# Supplementary material for: The Global Changes of N6-methyldeoxyadenosine in Response to Low Temperature in Arabidopsis thaliana and Rice
Source: Plants (Basel). 2023 Jun 19;12(12):2373. doi: 10.3390/plants12122373 (PMC10305114; doi:10.3390/plants12122373)
Supplement: Supplementary file 1 [file plants-12-02373-s001.zip]

Archive with 10 entries (10 files):
- Figure S1-5.pdf
- Table S1.xlsx
- Table S2.xlsx
- Table S3.xlsx
- Table S4.xlsx
- Table S5.xlsx
- Table S6.xlsx
- Table S7.xlsx
- Table S8.xlsx
- Table S9.xlsx
