# Supplementary material for: The Global Changes of N6-methyldeoxyadenosine in Response to Low Temperature in Arabidopsis thaliana and Rice
Source: Plants (Basel). 2023 Jun 19;12(12):2373. doi: 10.3390/plants12122373 (PMC10305114; doi:10.3390/plants12122373)
Supplement: Supplementary file 1 [file plants-12-02373-s001.zip › Table S1.xlsx]

## Sheet: Sheet1
		Table S1. A summary of 6mA-IP-seq and RNA-seq information.
6mA-IP-seq
	Total number of pair reads	Number of mappable pair reads	Ratio of mappable pair reads	Number of uniquely mapped pair reads	Ratio of uniquely mapped pair reads
Input	121221629	97274229	0.802449	80213526	0.66171
Normal-1	135742017	105437504	0.776749	89868993	0.662057
Normal-2	172892939	131648160	0.761443	112216552	0.649052
Cold-1	102097026	87007116	0.8522	69853553	0.684188
Cold-2	97225803	82134414	0.84478	66287204	0.681786
mRNA-seq
	Total number of pair reads	Number of mappable pair reads	Ratio of mappable pair reads	Number of uniquely mapped pair reads	Ratio of uniquely mapped pair reads
Normal-1	33451014	30858366	0.922494	30160018	0.901617
Normal-2	32311859	29747964	0.920652	29387338	0.909491
Normal-3	32238613	29882108	0.926904	29548746	0.916564
Cold-1	31521106	28378431	0.900299	28054037	0.890008
Cold-2	31543067	28607512	0.906935	28166288	0.892947
Cold-3	31513180	28470831	0.903458	28051047	0.890137
