# Supplementary material for: The Global Changes of N6-methyldeoxyadenosine in Response to Low Temperature in Arabidopsis thaliana and Rice
Source: Plants (Basel). 2023 Jun 19;12(12):2373. doi: 10.3390/plants12122373 (PMC10305114; doi:10.3390/plants12122373)
Supplement: Supplementary file 1 [file plants-12-02373-s001.zip › Table S2.xlsx]

## Sheet: sheet
	Table S2. Identification of 6mA peaks under normal and cold conditions in Arabidopsis.
Normal				Cold
Chr	start	end		Chr	start	end
Chr1	23800	24199		Chr1	23400	24399
Chr1	46400	47199		Chr1	46400	47199
Chr1	117000	117399		Chr1	53800	54399
Chr1	180400	180799		Chr1	97600	97999
Chr1	210000	210399		Chr1	117000	117599
Chr1	237400	237999		Chr1	137000	137599
Chr1	240600	241199		Chr1	149400	149999
Chr1	348400	349199		Chr1	180400	180799
Chr1	354200	354599		Chr1	182200	182599
Chr1	365600	365999		Chr1	199800	200399
Chr1	399200	399599		Chr1	237400	238199
Chr1	449200	450199		Chr1	240600	241199
Chr1	471200	471599		Chr1	294800	295599
Chr1	494400	494999		Chr1	300800	301199
Chr1	504600	505399		Chr1	308000	308799
Chr1	541800	542199		Chr1	325600	326399
Chr1	618000	618599		Chr1	348400	348999
Chr1	726600	726799		Chr1	354200	354599
Chr1	755400	755799		Chr1	355600	356399
Chr1	789800	790399		Chr1	365600	365999
Chr1	835800	836599		Chr1	397000	397599
Chr1	865800	867399		Chr1	399200	399799
Chr1	882200	883199		Chr1	405000	405199
Chr1	897000	897599		Chr1	412000	412599
Chr1	1122000	1122599		Chr1	415600	416599
Chr1	1300400	1301199		Chr1	429600	429999
Chr1	1477600	1477999		Chr1	449000	450199
Chr1	1478400	1478799		Chr1	452000	452599
Chr1	1489600	1489799		Chr1	462400	462999
Chr1	1590000	1590599		Chr1	471200	471599
Chr1	1601200	1601799		Chr1	493800	494999
Chr1	1636600	1637199		Chr1	504600	505399
Chr1	1645800	1646399		Chr1	541800	542199
Chr1	1681400	1682599		Chr1	543600	543999
Chr1	1692000	1692399		Chr1	583600	583999
Chr1	1701000	1701599		Chr1	608800	609199
Chr1	1703000	1703399		Chr1	618000	618599
Chr1	1741000	1741399		Chr1	627200	627799
Chr1	1754600	1755599		Chr1	631600	632199
Chr1	1779200	1780399		Chr1	692000	692599
Chr1	1790000	1790599		Chr1	726600	726999
Chr1	1808000	1808399		Chr1	737400	738199
Chr1	1859800	1860399		Chr1	754000	754399
Chr1	1895200	1895599		Chr1	755400	755799
Chr1	2002000	2002399		Chr1	756400	756799
Chr1	2030400	2030799		Chr1	787000	787399
Chr1	2060600	2060999		Chr1	789800	790799
Chr1	2095800	2096399		Chr1	795800	796199
Chr1	2105000	2105599		Chr1	823200	823799
Chr1	2117800	2118399		Chr1	835800	836599
Chr1	2159000	2159999		Chr1	865800	867399
Chr1	2249800	2250199		Chr1	876200	877199
Chr1	2351600	2352599		Chr1	882200	883199
Chr1	2403200	2403999		Chr1	884200	884999
Chr1	2415000	2415599		Chr1	885800	886199
Chr1	2418000	2418399		Chr1	891200	891999
Chr1	2445800	2446399		Chr1	893600	893999
Chr1	2455000	2455599		Chr1	897000	897599
Chr1	2562800	2563399		Chr1	917200	917799
Chr1	2603200	2603599		Chr1	966000	966399
Chr1	2626000	2626399		Chr1	983200	983599
Chr1	2632200	2632799		Chr1	1027600	1027999
Chr1	2709000	2709399		Chr1	1055200	1056199
Chr1	2724600	2724799		Chr1	1063600	1064199
Chr1	2770800	2771199		Chr1	1070000	1071199
Chr1	2805200	2805999		Chr1	1086400	1086799
Chr1	2860200	2860599		Chr1	1104400	1104999
Chr1	2879800	2880599		Chr1	1122000	1122599
Chr1	2911800	2912199		Chr1	1142000	1142799
Chr1	2929200	2929799		Chr1	1143200	1144399
Chr1	2949800	2950199		Chr1	1164000	1164399
Chr1	2951400	2951799		Chr1	1182400	1182999
Chr1	2970600	2971199		Chr1	1190400	1190799
Chr1	2984200	2985399		Chr1	1202200	1202599
Chr1	3026400	3026599		Chr1	1300400	1301199
Chr1	3157200	3157999		Chr1	1326000	1326599
Chr1	3191400	3191999		Chr1	1348600	1349199
Chr1	3363400	3363599		Chr1	1477600	1477999
Chr1	3387800	3388399		Chr1	1478400	1478799
Chr1	3397000	3397199		Chr1	1482600	1483399
Chr1	3414800	3415399		Chr1	1489400	1489799
Chr1	3470000	3470999		Chr1	1500800	1501599
Chr1	3493000	3493199		Chr1	1577400	1579199
Chr1	3511600	3511799		Chr1	1579800	1580799
Chr1	3526000	3526399		Chr1	1590000	1590599
Chr1	3595000	3595399		Chr1	1601200	1601799
Chr1	3645600	3646199		Chr1	1636600	1637199
Chr1	3747200	3747599		Chr1	1645600	1646599
Chr1	3767000	3767799		Chr1	1648000	1648399
Chr1	3842400	3842999		Chr1	1681400	1682599
Chr1	3913200	3913799		Chr1	1691800	1692399
Chr1	3941600	3942199		Chr1	1701000	1701599
Chr1	3949200	3949799		Chr1	1702600	1703599
Chr1	3980000	3980599		Chr1	1741000	1741599
Chr1	4021600	4021999		Chr1	1754600	1755599
Chr1	4053200	4053599		Chr1	1768000	1768799
Chr1	4071400	4072399		Chr1	1779200	1780599
Chr1	4218200	4218799		Chr1	1790000	1790799
Chr1	4241000	4241799		Chr1	1791600	1791999
Chr1	4308800	4309599		Chr1	1802600	1803399
Chr1	4374400	4374799		Chr1	1808000	1808399
Chr1	4442800	4443399		Chr1	1816400	1817399
Chr1	4448000	4448599		Chr1	1818400	1818999
Chr1	4517600	4517999		Chr1	1859800	1860399
Chr1	4529600	4530199		Chr1	1895200	1895599
Chr1	4542000	4542399		Chr1	1910400	1910799
Chr1	4575200	4575799		Chr1	1972600	1972999
Chr1	4595200	4595599		Chr1	1995800	1996199
Chr1	4620200	4620599		Chr1	2002000	2002599
Chr1	4622800	4623199		Chr1	2030400	2030799
Chr1	4627200	4628199		Chr1	2035200	2035799
Chr1	4633800	4634199		Chr1	2054800	2055399
Chr1	4637000	4637599		Chr1	2060600	2060999
Chr1	4651200	4651799		Chr1	2095600	2096599
Chr1	4671400	4672199		Chr1	2105000	2105599
Chr1	4704600	4704999		Chr1	2117800	2118399
Chr1	4727000	4727399		Chr1	2120200	2120599
Chr1	4755400	4755999		Chr1	2124200	2125599
Chr1	4849200	4849599		Chr1	2126600	2127399
Chr1	4862000	4862399		Chr1	2159000	2159999
Chr1	4908200	4908599		Chr1	2192000	2192599
Chr1	4951400	4952399		Chr1	2200200	2200599
Chr1	4973000	4973599		Chr1	2219200	2219599
Chr1	4984000	4984599		Chr1	2248000	2248399
Chr1	5042400	5042599		Chr1	2249200	2250199
Chr1	5056200	5056399		Chr1	2260800	2261599
Chr1	5076200	5076599		Chr1	2277800	2278599
Chr1	5088200	5088599		Chr1	2292600	2293199
Chr1	5134200	5134399		Chr1	2304400	2304799
Chr1	5159400	5159799		Chr1	2328000	2328599
Chr1	5185800	5186399		Chr1	2343600	2344199
Chr1	5228400	5228999		Chr1	2351800	2352599
Chr1	5252600	5252999		Chr1	2401200	2401599
Chr1	5257200	5257599		Chr1	2403400	2404199
Chr1	5269400	5270199		Chr1	2415000	2415599
Chr1	5291800	5292199		Chr1	2418000	2418399
Chr1	5329400	5329999		Chr1	2423400	2423599
Chr1	5404000	5404799		Chr1	2430000	2430599
Chr1	5449400	5450199		Chr1	2434400	2434999
Chr1	5477200	5478199		Chr1	2437200	2437999
Chr1	5494200	5495399		Chr1	2446000	2446399
Chr1	5555800	5556399		Chr1	2447600	2448799
Chr1	5653000	5653399		Chr1	2454600	2455599
Chr1	5654000	5654599		Chr1	2516000	2516599
Chr1	5714200	5714399		Chr1	2562800	2563399
Chr1	5770000	5770599		Chr1	2567600	2568199
Chr1	5807600	5807999		Chr1	2568800	2569599
Chr1	5833600	5833999		Chr1	2603000	2603599
Chr1	5837800	5838599		Chr1	2616800	2617199
Chr1	5852000	5852999		Chr1	2626000	2626399
Chr1	5856600	5856999		Chr1	2632200	2632799
Chr1	5922800	5923599		Chr1	2636000	2636599
Chr1	5947000	5947399		Chr1	2662800	2663399
Chr1	5987200	5987799		Chr1	2690800	2691799
Chr1	6039200	6039599		Chr1	2693800	2694199
Chr1	6068200	6068799		Chr1	2709000	2709599
Chr1	6076200	6076799		Chr1	2724400	2724799
Chr1	6113600	6114199		Chr1	2770200	2771399
Chr1	6352800	6353399		Chr1	2771800	2771999
Chr1	6365600	6366199		Chr1	2805200	2805999
Chr1	6369200	6369599		Chr1	2860200	2860799
Chr1	6374400	6374999		Chr1	2879800	2880799
Chr1	6436000	6436399		Chr1	2911800	2912199
Chr1	6466600	6467399		Chr1	2929200	2929799
Chr1	6550800	6551399		Chr1	2949800	2950199
Chr1	6573400	6573999		Chr1	2951400	2951799
Chr1	6575000	6575399		Chr1	2970600	2971199
Chr1	6593400	6593799		Chr1	2984600	2985399
Chr1	6683400	6683999		Chr1	3011600	3011999
Chr1	6723000	6723399		Chr1	3035800	3036199
Chr1	6733800	6734399		Chr1	3054000	3054199
Chr1	6764800	6764999		Chr1	3093800	3094199
Chr1	6802200	6802999		Chr1	3098400	3099399
Chr1	6821200	6822399		Chr1	3104600	3104999
Chr1	6903800	6904199		Chr1	3157400	3158199
Chr1	6956600	6956999		Chr1	3162200	3163599
Chr1	6971600	6971999		Chr1	3173400	3173799
Chr1	6978200	6978599		Chr1	3191400	3191999
Chr1	7005400	7005999		Chr1	3218400	3219199
Chr1	7009800	7010399		Chr1	3229000	3229599
Chr1	7014800	7015399		Chr1	3244200	3244799
Chr1	7167600	7168199		Chr1	3282800	3283399
Chr1	7169000	7169399		Chr1	3285400	3286199
Chr1	7265000	7265399		Chr1	3294800	3295399
Chr1	7285400	7286599		Chr1	3298000	3298399
Chr1	7295600	7296199		Chr1	3299000	3299599
Chr1	7309000	7309999		Chr1	3320400	3320999
Chr1	7318400	7318799		Chr1	3325800	3326799
Chr1	7330200	7330599		Chr1	3329600	3330399
Chr1	7349200	7349599		Chr1	3363200	3363799
Chr1	7386200	7386599		Chr1	3364200	3364799
Chr1	7411600	7411999		Chr1	3365200	3365999
Chr1	7453600	7454999		Chr1	3387800	3388399
Chr1	7464800	7465199		Chr1	3397000	3397199
Chr1	7469400	7469999		Chr1	3407000	3407399
Chr1	7497600	7497799		Chr1	3414800	3415399
Chr1	7557200	7557799		Chr1	3439400	3440199
Chr1	7603200	7603799		Chr1	3461000	3461599
Chr1	7606400	7606799		Chr1	3470000	3470999
Chr1	7680800	7681599		Chr1	3472200	3472999
Chr1	7696400	7696799		Chr1	3484800	3485399
Chr1	7704800	7705399		Chr1	3493000	3493399
Chr1	7734200	7734599		Chr1	3506400	3507599
Chr1	7735400	7735999		Chr1	3510400	3510799
Chr1	7760400	7760799		Chr1	3511400	3511799
Chr1	7801200	7801999		Chr1	3525800	3526399
Chr1	7874400	7875799		Chr1	3550400	3550999
Chr1	7888400	7888799		Chr1	3590600	3590999
Chr1	7890400	7890999		Chr1	3595000	3595399
Chr1	7895000	7895399		Chr1	3629600	3630599
Chr1	7903600	7904599		Chr1	3631000	3631399
Chr1	7908000	7908399		Chr1	3635800	3636199
Chr1	7911800	7912199		Chr1	3645600	3646199
Chr1	7994000	7994599		Chr1	3656000	3656199
Chr1	8058800	8059199		Chr1	3662000	3662399
Chr1	8100800	8101199		Chr1	3678600	3679199
Chr1	8104200	8104599		Chr1	3681800	3682199
Chr1	8121400	8121799		Chr1	3706800	3707399
Chr1	8129200	8130199		Chr1	3747200	3747799
Chr1	8160800	8161399		Chr1	3767000	3767799
Chr1	8216400	8216999		Chr1	3836800	3837399
Chr1	8243000	8243399		Chr1	3838000	3838999
Chr1	8295600	8296399		Chr1	3842400	3843199
Chr1	8311200	8311599		Chr1	3849200	3849399
Chr1	8313400	8314199		Chr1	3850000	3850399
Chr1	8319800	8320999		Chr1	3912000	3912799
Chr1	8344600	8345199		Chr1	3913200	3913799
Chr1	8349200	8349799		Chr1	3915000	3915199
Chr1	8388800	8391599		Chr1	3941600	3942199
Chr1	8509200	8509599		Chr1	3949000	3950399
Chr1	8523600	8524199		Chr1	3980000	3980599
Chr1	8525400	8525999		Chr1	3986000	3986599
Chr1	8545400	8545999		Chr1	4020400	4020799
Chr1	8555000	8555399		Chr1	4021800	4021999
Chr1	8593400	8593799		Chr1	4030000	4030599
Chr1	8595800	8596199		Chr1	4053200	4053399
Chr1	8606000	8606599		Chr1	4070800	4072399
Chr1	8662600	8663199		Chr1	4115000	4116199
Chr1	8723800	8724199		Chr1	4119600	4120599
Chr1	8732800	8733599		Chr1	4165600	4165799
Chr1	8754600	8754999		Chr1	4201200	4201999
Chr1	8850600	8850999		Chr1	4241000	4241999
Chr1	8893000	8893399		Chr1	4251400	4252399
Chr1	8914200	8914599		Chr1	4264600	4265199
Chr1	8995200	8995599		Chr1	4274600	4275799
Chr1	9042000	9042799		Chr1	4298600	4299799
Chr1	9078200	9079599		Chr1	4305000	4306199
Chr1	9084200	9085199		Chr1	4308800	4309399
Chr1	9097800	9098599		Chr1	4326800	4327599
Chr1	9158400	9159799		Chr1	4333000	4333799
Chr1	9198600	9199199		Chr1	4345600	4346199
Chr1	9248400	9248799		Chr1	4348000	4348199
Chr1	9250200	9250799		Chr1	4374400	4374799
Chr1	9260800	9261599		Chr1	4375600	4376199
Chr1	9282600	9283599		Chr1	4423800	4424199
Chr1	9284600	9284999		Chr1	4433600	4433999
Chr1	9318200	9318599		Chr1	4442800	4443399
Chr1	9351200	9351599		Chr1	4448000	4448599
Chr1	9352400	9353399		Chr1	4452400	4452799
Chr1	9359000	9359799		Chr1	4472000	4472799
Chr1	9386000	9386599		Chr1	4486800	4487599
Chr1	9422000	9422599		Chr1	4500400	4500999
Chr1	9447400	9448199		Chr1	4517600	4518199
Chr1	9478600	9478999		Chr1	4529600	4530199
Chr1	9527000	9527399		Chr1	4545800	4546399
Chr1	9539000	9539399		Chr1	4551200	4551599
Chr1	9572200	9572799		Chr1	4575200	4575799
Chr1	9608000	9608599		Chr1	4615600	4616599
Chr1	9614600	9614999		Chr1	4620200	4620799
Chr1	9642600	9643199		Chr1	4622800	4623199
Chr1	9662600	9662999		Chr1	4627200	4628399
Chr1	9667000	9667399		Chr1	4629600	4629999
Chr1	9707600	9708399		Chr1	4631800	4632199
Chr1	9756400	9756999		Chr1	4633800	4634199
Chr1	9776800	9777399		Chr1	4637000	4637599
Chr1	9779200	9779599		Chr1	4641200	4641799
Chr1	9782200	9782399		Chr1	4651200	4651599
Chr1	9787600	9788199		Chr1	4671200	4672399
Chr1	9831200	9831799		Chr1	4726800	4727599
Chr1	9879000	9879399		Chr1	4748000	4748599
Chr1	9899800	9899999		Chr1	4755400	4755999
Chr1	9912000	9912199		Chr1	4812200	4812399
Chr1	9964000	9964599		Chr1	4849200	4849599
Chr1	9966600	9967399		Chr1	4861800	4862399
Chr1	9973600	9973999		Chr1	4890400	4891199
Chr1	9987000	9987599		Chr1	4899000	4899399
Chr1	10013200	10013999		Chr1	4907600	4908599
Chr1	10016400	10017399		Chr1	4915400	4916199
Chr1	10103600	10104199		Chr1	4947000	4947399
Chr1	10114000	10114599		Chr1	4951200	4952599
Chr1	10154200	10154799		Chr1	4954200	4954999
Chr1	10283800	10284799		Chr1	4963400	4963799
Chr1	10312800	10313599		Chr1	4972800	4973799
Chr1	10349200	10349399		Chr1	4984000	4984599
Chr1	10457600	10457999		Chr1	4985800	4986199
Chr1	10461800	10462199		Chr1	5024400	5025399
Chr1	10485600	10486799		Chr1	5042400	5042799
Chr1	10582000	10582599		Chr1	5047800	5048199
Chr1	10602800	10602999		Chr1	5056200	5056399
Chr1	10655600	10655999		Chr1	5076200	5076599
Chr1	10660200	10660799		Chr1	5088200	5088599
Chr1	10728000	10728799		Chr1	5122600	5123599
Chr1	10790600	10790999		Chr1	5134200	5134399
Chr1	10805800	10806399		Chr1	5159200	5159799
Chr1	10846800	10847399		Chr1	5185800	5186399
Chr1	10888200	10888799		Chr1	5199200	5200199
Chr1	10904800	10905799		Chr1	5218800	5219199
Chr1	10918200	10918599		Chr1	5227000	5227799
Chr1	10968000	10968599		Chr1	5228400	5228999
Chr1	10975400	10975999		Chr1	5245400	5245999
Chr1	11043000	11043599		Chr1	5252400	5252999
Chr1	11052400	11052799		Chr1	5257200	5257799
Chr1	11114800	11115799		Chr1	5268200	5268599
Chr1	11131000	11131399		Chr1	5269200	5270399
Chr1	11156600	11156999		Chr1	5272400	5272799
Chr1	11162400	11163399		Chr1	5291800	5292199
Chr1	11171400	11171799		Chr1	5301600	5301999
Chr1	11186200	11186399		Chr1	5307000	5307199
Chr1	11194600	11194999		Chr1	5329400	5329999
Chr1	11215800	11216199		Chr1	5330600	5331399
Chr1	11221400	11221999		Chr1	5340000	5340399
Chr1	11239400	11239799		Chr1	5341400	5341999
Chr1	11255000	11255399		Chr1	5367800	5368399
Chr1	11370400	11371399		Chr1	5398800	5399799
Chr1	11383600	11384399		Chr1	5404000	5404799
Chr1	11424400	11424999		Chr1	5419800	5421399
Chr1	11447800	11448799		Chr1	5425200	5426399
Chr1	11457600	11458799		Chr1	5444400	5445599
Chr1	11479800	11481199		Chr1	5449400	5450399
Chr1	11515400	11515999		Chr1	5453400	5454199
Chr1	11523400	11523999		Chr1	5465200	5465799
Chr1	11532000	11532799		Chr1	5471200	5471999
Chr1	11553200	11553799		Chr1	5477200	5478199
Chr1	11560600	11561399		Chr1	5494800	5495399
Chr1	11581200	11581599		Chr1	5502200	5502599
Chr1	11584000	11585199		Chr1	5555800	5556399
Chr1	11612400	11613799		Chr1	5556800	5557799
Chr1	11625400	11625599		Chr1	5575000	5575399
Chr1	11629800	11630799		Chr1	5628200	5628599
Chr1	11644800	11645199		Chr1	5649200	5649599
Chr1	11650200	11650799		Chr1	5654000	5654599
Chr1	11662000	11662399		Chr1	5697000	5697599
Chr1	11673800	11674599		Chr1	5709800	5710799
Chr1	11695800	11696599		Chr1	5712200	5712599
Chr1	11712800	11713199		Chr1	5714200	5714399
Chr1	11738600	11738799		Chr1	5727400	5728199
Chr1	11761200	11762199		Chr1	5769400	5770599
Chr1	11777800	11778399		Chr1	5781600	5781999
Chr1	11784400	11784999		Chr1	5807600	5807999
Chr1	11806400	11806799		Chr1	5833600	5833999
Chr1	11814000	11814399		Chr1	5837800	5838999
Chr1	11847000	11847399		Chr1	5848800	5849599
Chr1	11858800	11859199		Chr1	5852000	5852999
Chr1	11881800	11882399		Chr1	5856600	5856999
Chr1	11903000	11903399		Chr1	5861600	5862199
Chr1	11908400	11908999		Chr1	5900200	5900599
Chr1	11977400	11978199		Chr1	5922800	5923599
Chr1	12032000	12032399		Chr1	5947000	5947399
Chr1	12047400	12047999		Chr1	5987400	5987799
Chr1	12064400	12064999		Chr1	6011200	6011599
Chr1	12157800	12158599		Chr1	6033600	6033799
Chr1	12194800	12195199		Chr1	6039200	6039799
Chr1	12196600	12196999		Chr1	6050200	6050799
Chr1	12198800	12199799		Chr1	6062000	6062399
Chr1	12204600	12204999		Chr1	6064600	6065399
Chr1	12237600	12237999		Chr1	6067400	6067799
Chr1	12352000	12352399		Chr1	6068200	6068799
Chr1	12360000	12360599		Chr1	6076200	6076799
Chr1	12381200	12381999		Chr1	6108200	6108799
Chr1	12419000	12419599		Chr1	6113600	6114199
Chr1	12442000	12442999		Chr1	6256000	6256799
Chr1	12444800	12445199		Chr1	6292600	6293799
Chr1	12485800	12486799		Chr1	6352600	6353399
Chr1	12493600	12494599		Chr1	6365600	6365999
Chr1	12514600	12515399		Chr1	6369200	6369599
Chr1	12515800	12516199		Chr1	6374600	6374999
Chr1	12529200	12529599		Chr1	6409000	6409199
Chr1	12543400	12543799		Chr1	6435800	6436399
Chr1	12550400	12550999		Chr1	6452600	6453199
Chr1	12565800	12566199		Chr1	6466600	6467399
Chr1	12577800	12578199		Chr1	6510600	6511399
Chr1	12588800	12589799		Chr1	6536000	6536599
Chr1	12601200	12601999		Chr1	6550800	6551399
Chr1	12604800	12605199		Chr1	6559200	6559599
Chr1	12621600	12621999		Chr1	6569000	6569599
Chr1	12629200	12629599		Chr1	6573600	6573999
Chr1	12649800	12650999		Chr1	6575000	6575399
Chr1	12658400	12658799		Chr1	6579200	6579599
Chr1	12747200	12747799		Chr1	6594800	6595199
Chr1	12845600	12845999		Chr1	6614000	6614599
Chr1	12917600	12918199		Chr1	6623600	6624799
Chr1	12930000	12930599		Chr1	6629400	6630599
Chr1	12956400	12956799		Chr1	6643800	6644399
Chr1	12969200	12969999		Chr1	6671800	6672599
Chr1	12970800	12971599		Chr1	6683400	6683799
Chr1	12974800	12975599		Chr1	6723000	6723399
Chr1	12978200	12978599		Chr1	6733800	6734399
Chr1	12997200	12997599		Chr1	6745800	6746399
Chr1	13020800	13021399		Chr1	6753800	6754199
Chr1	13023600	13023999		Chr1	6760400	6761599
Chr1	13054200	13054599		Chr1	6764800	6764999
Chr1	13071400	13072199		Chr1	6801200	6803199
Chr1	13085200	13085599		Chr1	6805400	6805799
Chr1	13136200	13136599		Chr1	6821200	6822599
Chr1	13180800	13181199		Chr1	6832200	6832999
Chr1	13186800	13187199		Chr1	6833400	6834199
Chr1	13205800	13206799		Chr1	6902800	6904399
Chr1	13237200	13237799		Chr1	6905400	6905999
Chr1	13239800	13240199		Chr1	6914000	6914399
Chr1	13297600	13297799		Chr1	6915400	6916799
Chr1	13298200	13298999		Chr1	6926000	6926399
Chr1	13321400	13322199		Chr1	6939800	6940799
Chr1	13327600	13328199		Chr1	6956200	6956999
Chr1	13403200	13403999		Chr1	6970000	6970399
Chr1	13437600	13438799		Chr1	6971400	6971999
Chr1	13447400	13447799		Chr1	6978000	6978599
Chr1	13507800	13508399		Chr1	7005400	7005999
Chr1	13514400	13515399		Chr1	7009800	7010399
Chr1	13533400	13533799		Chr1	7014800	7015399
Chr1	13568800	13569199		Chr1	7029600	7030199
Chr1	13574200	13574799		Chr1	7043200	7043999
Chr1	13592000	13592399		Chr1	7088200	7088799
Chr1	13604600	13605199		Chr1	7095600	7096199
Chr1	13610600	13610999		Chr1	7122400	7122799
Chr1	13623600	13624199		Chr1	7129600	7129999
Chr1	13626200	13626799		Chr1	7162400	7162799
Chr1	13638800	13638999		Chr1	7167600	7168199
Chr1	13646000	13646399		Chr1	7169000	7169599
Chr1	13653600	13654199		Chr1	7216200	7216599
Chr1	13659800	13660399		Chr1	7245000	7245599
Chr1	13667000	13667199		Chr1	7264800	7265399
Chr1	13680600	13680999		Chr1	7280800	7281199
Chr1	13697200	13697799		Chr1	7285200	7286599
Chr1	13706600	13706999		Chr1	7295600	7296199
Chr1	13710000	13710799		Chr1	7309000	7310199
Chr1	13717800	13718399		Chr1	7318200	7318999
Chr1	13726800	13727999		Chr1	7325200	7325599
Chr1	13731800	13732199		Chr1	7330200	7330799
Chr1	13763200	13763799		Chr1	7349200	7349599
Chr1	13772000	13772799		Chr1	7386000	7386599
Chr1	13776600	13777199		Chr1	7411600	7413599
Chr1	13835200	13835799		Chr1	7453600	7454999
Chr1	13841200	13842199		Chr1	7464800	7465399
Chr1	13977400	13977799		Chr1	7469400	7469999
Chr1	13979000	13979599		Chr1	7475800	7475999
Chr1	14000000	14000799		Chr1	7497400	7497799
Chr1	14029800	14030199		Chr1	7537000	7537399
Chr1	14033600	14034199		Chr1	7557200	7557799
Chr1	14059000	14059399		Chr1	7565000	7565799
Chr1	14062000	14062199		Chr1	7593200	7593599
Chr1	14065800	14066799		Chr1	7603200	7603799
Chr1	14122600	14123199		Chr1	7606200	7606799
Chr1	14129200	14129599		Chr1	7642400	7642999
Chr1	14134800	14135599		Chr1	7678600	7678999
Chr1	14155200	14155599		Chr1	7680800	7681599
Chr1	14170600	14171199		Chr1	7696400	7696799
Chr1	14245200	14245999		Chr1	7704800	7705399
Chr1	14246800	14247599		Chr1	7734200	7734599
Chr1	14252000	14252399		Chr1	7735600	7735999
Chr1	14275200	14275599		Chr1	7760400	7760799
Chr1	14276400	14276999		Chr1	7768400	7769799
Chr1	14331600	14331999		Chr1	7801600	7801999
Chr1	14335000	14335799		Chr1	7840000	7840599
Chr1	14439600	14440199		Chr1	7850600	7850999
Chr1	14499400	14500199		Chr1	7874800	7875799
Chr1	14540400	14540799		Chr1	7888400	7888799
Chr1	14592000	14592999		Chr1	7890400	7890999
Chr1	14923400	14923999		Chr1	7892800	7893399
Chr1	15058400	15060199		Chr1	7895000	7895599
Chr1	15087800	15088599		Chr1	7903800	7904599
Chr1	15089000	15089199		Chr1	7908800	7909599
Chr1	15090400	15090799		Chr1	7911800	7912199
Chr1	15091800	15092199		Chr1	7912600	7913599
Chr1	15093600	15095599		Chr1	7915800	7916199
Chr1	15099800	15104399		Chr1	7953800	7954599
Chr1	15106800	15107799		Chr1	7957400	7958599
Chr1	15111600	15111799		Chr1	7967400	7967999
Chr1	15135600	15138799		Chr1	7970400	7970799
Chr1	15139600	15141199		Chr1	7994200	7994599
Chr1	15142000	15142599		Chr1	7995800	7996199
Chr1	15143200	15144999		Chr1	7996600	7997399
Chr1	15145800	15145999		Chr1	8015800	8016199
Chr1	15147000	15147399		Chr1	8018800	8019799
Chr1	15149000	15149599		Chr1	8050600	8051599
Chr1	15178200	15178799		Chr1	8058800	8059199
Chr1	15179200	15179599		Chr1	8070000	8070799
Chr1	15198200	15199199		Chr1	8100600	8101199
Chr1	15200600	15201199		Chr1	8104200	8104599
Chr1	15202000	15202599		Chr1	8121000	8121799
Chr1	15203000	15205999		Chr1	8129400	8130199
Chr1	15206400	15206799		Chr1	8133000	8133599
Chr1	15207400	15207799		Chr1	8187200	8187599
Chr1	15208200	15209399		Chr1	8216400	8217199
Chr1	15297800	15298199		Chr1	8220200	8220399
Chr1	15415000	15415999		Chr1	8242800	8243399
Chr1	15420800	15421199		Chr1	8245200	8245599
Chr1	15423800	15423999		Chr1	8257800	8258399
Chr1	15424400	15424799		Chr1	8281000	8281799
Chr1	15427800	15428599		Chr1	8295600	8296999
Chr1	15429400	15430399		Chr1	8312000	8312399
Chr1	15431200	15431999		Chr1	8313200	8314799
Chr1	15540800	15541599		Chr1	8316200	8316799
Chr1	15584200	15584599		Chr1	8319800	8320399
Chr1	15709400	15709999		Chr1	8325000	8325399
Chr1	15766600	15767399		Chr1	8344600	8345199
Chr1	15799800	15800399		Chr1	8349200	8349799
Chr1	15800800	15801599		Chr1	8388600	8391599
Chr1	15806600	15807399		Chr1	8412600	8412999
Chr1	15808800	15809599		Chr1	8417600	8417999
Chr1	15814800	15816399		Chr1	8424400	8425399
Chr1	15870400	15870999		Chr1	8432200	8432799
Chr1	15899000	15899599		Chr1	8436000	8436399
Chr1	15951800	15952399		Chr1	8509000	8509599
Chr1	15963600	15963999		Chr1	8523600	8524199
Chr1	15978600	15979799		Chr1	8525400	8525999
Chr1	16000000	16000399		Chr1	8528200	8528599
Chr1	16010200	16011599		Chr1	8534200	8535199
Chr1	16084800	16085799		Chr1	8545600	8545999
Chr1	16086400	16086999		Chr1	8549200	8549799
Chr1	16124800	16125199		Chr1	8555000	8555399
Chr1	16136400	16137199		Chr1	8558600	8558999
Chr1	16165600	16166799		Chr1	8562400	8562799
Chr1	16172400	16172799		Chr1	8593400	8593799
Chr1	16176200	16176799		Chr1	8595800	8595999
Chr1	16292200	16292799		Chr1	8606000	8606399
Chr1	16310400	16311199		Chr1	8614600	8615199
Chr1	16321200	16321599		Chr1	8631400	8632199
Chr1	16359000	16359399		Chr1	8662600	8663199
Chr1	16380200	16380599		Chr1	8666200	8666599
Chr1	16386000	16387199		Chr1	8703000	8703599
Chr1	16393200	16393799		Chr1	8723800	8724199
Chr1	16395600	16395999		Chr1	8730600	8731199
Chr1	16419400	16420399		Chr1	8732800	8733599
Chr1	16465200	16465799		Chr1	8748800	8749199
Chr1	16471400	16471799		Chr1	8754600	8755199
Chr1	16478800	16479799		Chr1	8846000	8846199
Chr1	16487200	16487599		Chr1	8850800	8851399
Chr1	16493600	16494199		Chr1	8893000	8893399
Chr1	16556400	16556999		Chr1	8903800	8904199
Chr1	16577400	16578599		Chr1	8911400	8911999
Chr1	16610200	16610599		Chr1	8914200	8914799
Chr1	16621000	16621599		Chr1	8928400	8928799
Chr1	16623400	16623999		Chr1	8934000	8934599
Chr1	16637400	16637799		Chr1	8960000	8960799
Chr1	16654000	16654399		Chr1	8969600	8970399
Chr1	16663200	16663799		Chr1	8993400	8993999
Chr1	16675400	16676399		Chr1	8995200	8995599
Chr1	16711800	16712399		Chr1	9022000	9022599
Chr1	16739400	16739799		Chr1	9023600	9023999
Chr1	16775800	16776399		Chr1	9024400	9025199
Chr1	16813600	16814599		Chr1	9031600	9031999
Chr1	16855000	16855199		Chr1	9042000	9043199
Chr1	16908200	16908799		Chr1	9079200	9079599
Chr1	16924000	16924599		Chr1	9084000	9085199
Chr1	16926400	16926799		Chr1	9089800	9090599
Chr1	16982200	16982599		Chr1	9097800	9098599
Chr1	16991400	16992199		Chr1	9142600	9143399
Chr1	16995600	16996199		Chr1	9158400	9160599
Chr1	17007400	17007999		Chr1	9167200	9168199
Chr1	17075600	17075999		Chr1	9198400	9198999
Chr1	17094600	17095599		Chr1	9210600	9211199
Chr1	17098400	17099199		Chr1	9216600	9217399
Chr1	17170400	17170999		Chr1	9248400	9248799
Chr1	17222800	17223199		Chr1	9250200	9251199
Chr1	17233800	17234199		Chr1	9260800	9261599
Chr1	17234800	17235399		Chr1	9271800	9272199
Chr1	17296000	17296199		Chr1	9284600	9284999
Chr1	17297800	17298199		Chr1	9285600	9285999
Chr1	17301800	17302199		Chr1	9318200	9318599
Chr1	17313400	17313999		Chr1	9336400	9337199
Chr1	17319600	17320199		Chr1	9343600	9343999
Chr1	17341600	17342799		Chr1	9351200	9351599
Chr1	17351400	17351999		Chr1	9352400	9353399
Chr1	17419000	17419399		Chr1	9359400	9359799
Chr1	17424400	17424799		Chr1	9374200	9374799
Chr1	17428800	17430399		Chr1	9376200	9377199
Chr1	17511800	17512399		Chr1	9421800	9422599
Chr1	17558800	17559399		Chr1	9425400	9426199
Chr1	17569400	17569999		Chr1	9427600	9427999
Chr1	17582200	17582599		Chr1	9446400	9446799
Chr1	17584800	17585199		Chr1	9447200	9448599
Chr1	17588400	17588999		Chr1	9478400	9479199
Chr1	17590000	17590399		Chr1	9487200	9488199
Chr1	17614200	17614399		Chr1	9495400	9495599
Chr1	17634600	17634999		Chr1	9508000	9508599
Chr1	17676000	17676399		Chr1	9520000	9520599
Chr1	17687400	17687799		Chr1	9526800	9527199
Chr1	17688200	17688799		Chr1	9529200	9530199
Chr1	17714000	17714999		Chr1	9534600	9534999
Chr1	17723200	17723599		Chr1	9539000	9539599
Chr1	17766600	17766999		Chr1	9571600	9572599
Chr1	17873000	17873599		Chr1	9602200	9603199
Chr1	17882600	17883199		Chr1	9614600	9614999
Chr1	17918400	17918599		Chr1	9642200	9643199
Chr1	17940600	17940999		Chr1	9649000	9649399
Chr1	17976000	17976599		Chr1	9662600	9663599
Chr1	18074000	18074599		Chr1	9667000	9667399
Chr1	18095600	18095999		Chr1	9668400	9668999
Chr1	18101000	18101399		Chr1	9703400	9703999
Chr1	18129000	18129199		Chr1	9707800	9708399
Chr1	18159200	18159799		Chr1	9728800	9729399
Chr1	18229800	18230199		Chr1	9748200	9748599
Chr1	18235000	18235599		Chr1	9756600	9756999
Chr1	18310400	18311199		Chr1	9768200	9768799
Chr1	18313400	18313799		Chr1	9777000	9777399
Chr1	18317600	18318799		Chr1	9779200	9779799
Chr1	18360000	18360599		Chr1	9782000	9782599
Chr1	18412600	18412999		Chr1	9831200	9831799
Chr1	18425400	18425799		Chr1	9861200	9861599
Chr1	18469800	18470599		Chr1	9879000	9879399
Chr1	18486200	18487199		Chr1	9887000	9887999
Chr1	18491400	18491999		Chr1	9899600	9899999
Chr1	18519400	18519799		Chr1	9912000	9912199
Chr1	18618800	18619399		Chr1	9913000	9913199
Chr1	18692600	18692999		Chr1	9933800	9934399
Chr1	18693800	18694399		Chr1	9940800	9941799
Chr1	18744200	18744399		Chr1	9964000	9964799
Chr1	18763400	18763799		Chr1	9966600	9967599
Chr1	18782800	18783799		Chr1	9970400	9970999
Chr1	18849800	18850199		Chr1	9973000	9973999
Chr1	18895000	18895399		Chr1	9981800	9982199
Chr1	18929800	18930399		Chr1	9982800	9983199
Chr1	18984600	18985199		Chr1	9987000	9987599
Chr1	18991800	18992599		Chr1	10013600	10013999
Chr1	19021400	19021799		Chr1	10016400	10017799
Chr1	19041800	19042199		Chr1	10029400	10029799
Chr1	19058000	19058599		Chr1	10103600	10104199
Chr1	19070800	19071199		Chr1	10110800	10111199
Chr1	19075000	19075799		Chr1	10114000	10114599
Chr1	19103800	19104399		Chr1	10154200	10154799
Chr1	19132400	19133199		Chr1	10212400	10212599
Chr1	19137000	19137599		Chr1	10225600	10225999
Chr1	19199800	19200199		Chr1	10283800	10284199
Chr1	19280800	19281999		Chr1	10284600	10285799
Chr1	19297800	19298199		Chr1	10312800	10313599
Chr1	19312800	19313399		Chr1	10395800	10396199
Chr1	19315400	19315799		Chr1	10428000	10428799
Chr1	19326200	19326599		Chr1	10430000	10430399
Chr1	19413800	19414399		Chr1	10430800	10431199
Chr1	19503200	19503999		Chr1	10457400	10458199
Chr1	19528600	19529199		Chr1	10461600	10462199
Chr1	19566200	19566799		Chr1	10485600	10486799
Chr1	19570200	19570599		Chr1	10491600	10492199
Chr1	19604200	19604599		Chr1	10511400	10511799
Chr1	19608600	19609199		Chr1	10513800	10514599
Chr1	19613600	19614199		Chr1	10543200	10543799
Chr1	19645600	19646199		Chr1	10559800	10560999
Chr1	19700400	19700999		Chr1	10582000	10582599
Chr1	19745800	19746399		Chr1	10587600	10588399
Chr1	19758800	19759399		Chr1	10602800	10603199
Chr1	19790800	19791799		Chr1	10618800	10619599
Chr1	19859400	19860199		Chr1	10639800	10640799
Chr1	19879200	19879799		Chr1	10655600	10656199
Chr1	19901600	19901999		Chr1	10660200	10660799
Chr1	19916000	19916999		Chr1	10671200	10671999
Chr1	19955600	19956199		Chr1	10700600	10701199
Chr1	19972800	19973199		Chr1	10728000	10728799
Chr1	19978800	19979999		Chr1	10759000	10759399
Chr1	20001600	20002199		Chr1	10779400	10779999
Chr1	20005800	20006399		Chr1	10790600	10790999
Chr1	20014400	20014799		Chr1	10795000	10795399
Chr1	20027600	20027799		Chr1	10800400	10800999
Chr1	20033200	20033599		Chr1	10805200	10806399
Chr1	20048400	20048799		Chr1	10811200	10811599
Chr1	20059200	20059599		Chr1	10846600	10848199
Chr1	20188800	20189399		Chr1	10854600	10855399
Chr1	20225200	20225599		Chr1	10888200	10888999
Chr1	20235600	20236199		Chr1	10904800	10905799
Chr1	20277800	20277999		Chr1	10918200	10918599
Chr1	20296600	20296999		Chr1	10937000	10937399
Chr1	20334000	20334599		Chr1	10968000	10968599
Chr1	20350600	20351199		Chr1	10975400	10975999
Chr1	20362200	20362599		Chr1	10994800	10995399
Chr1	20447200	20447599		Chr1	11043000	11043799
Chr1	20505000	20505799		Chr1	11052400	11052999
Chr1	20534800	20535599		Chr1	11114800	11115999
Chr1	20538400	20538799		Chr1	11131000	11131399
Chr1	20541800	20542599		Chr1	11156600	11156999
Chr1	20553800	20554199		Chr1	11162200	11163199
Chr1	20652200	20653199		Chr1	11182800	11183199
Chr1	20668600	20668999		Chr1	11194600	11194999
Chr1	20708000	20708799		Chr1	11215800	11216199
Chr1	20725200	20725999		Chr1	11221600	11221999
Chr1	20743200	20743599		Chr1	11239200	11239799
Chr1	20763800	20764399		Chr1	11240800	11242199
Chr1	20807000	20807599		Chr1	11249600	11250199
Chr1	20848800	20849199		Chr1	11254800	11255599
Chr1	20870400	20870999		Chr1	11266400	11266799
Chr1	20885400	20885799		Chr1	11292200	11292799
Chr1	20914800	20915199		Chr1	11308600	11309399
Chr1	20942400	20943199		Chr1	11319000	11319599
Chr1	20977200	20977599		Chr1	11344600	11344999
Chr1	20984400	20984999		Chr1	11403000	11403799
Chr1	21075600	21076199		Chr1	11424400	11425399
Chr1	21093400	21093799		Chr1	11439800	11440199
Chr1	21134400	21134799		Chr1	11448200	11448999
Chr1	21180200	21181199		Chr1	11457600	11458799
Chr1	21197000	21197799		Chr1	11466200	11466599
Chr1	21238800	21240399		Chr1	11479800	11481199
Chr1	21254000	21254799		Chr1	11485000	11485399
Chr1	21364200	21364799		Chr1	11504800	11505199
Chr1	21371200	21371599		Chr1	11515400	11515999
Chr1	21411000	21411599		Chr1	11523600	11523799
Chr1	21436200	21436999		Chr1	11532000	11532999
Chr1	21437600	21438199		Chr1	11535800	11536399
Chr1	21439400	21439799		Chr1	11553200	11553799
Chr1	21441600	21442199		Chr1	11560600	11561399
Chr1	21467200	21467599		Chr1	11566000	11566599
Chr1	21512400	21512799		Chr1	11581200	11581599
Chr1	21520800	21520999		Chr1	11584200	11585399
Chr1	21521800	21522399		Chr1	11595600	11595999
Chr1	21554000	21554599		Chr1	11612400	11613199
Chr1	21561400	21562399		Chr1	11625400	11625599
Chr1	21613400	21613599		Chr1	11629800	11630799
Chr1	21614800	21615199		Chr1	11644800	11645199
Chr1	21629000	21629599		Chr1	11650200	11650599
Chr1	21966600	21966999		Chr1	11662000	11662399
Chr1	21967400	21967799		Chr1	11673800	11674599
Chr1	22044400	22044999		Chr1	11680800	11681399
Chr1	22102400	22102999		Chr1	11696000	11696799
Chr1	22166400	22167199		Chr1	11697600	11697999
Chr1	22202200	22202399		Chr1	11712600	11713199
Chr1	22203800	22204799		Chr1	11738600	11738799
Chr1	22297200	22297599		Chr1	11750600	11751399
Chr1	22307200	22307999		Chr1	11761400	11762199
Chr1	22415600	22416199		Chr1	11778000	11778599
Chr1	22424400	22424799		Chr1	11784400	11785399
Chr1	22483200	22483599		Chr1	11788800	11789199
Chr1	22494600	22495199		Chr1	11813800	11814399
Chr1	22610600	22610999		Chr1	11841200	11841599
Chr1	22633600	22633999		Chr1	11847000	11847599
Chr1	22634400	22634999		Chr1	11856200	11856799
Chr1	22704000	22704399		Chr1	11858800	11859199
Chr1	22730600	22731399		Chr1	11881600	11882399
Chr1	22793400	22793999		Chr1	11903000	11903399
Chr1	22813200	22813799		Chr1	11908200	11908999
Chr1	22824200	22824599		Chr1	11912400	11912799
Chr1	22847000	22847599		Chr1	11977200	11978199
Chr1	22854600	22855199		Chr1	12032000	12032399
Chr1	22881800	22882599		Chr1	12047400	12047999
Chr1	22888000	22888999		Chr1	12052400	12052799
Chr1	22969600	22970199		Chr1	12058200	12058799
Chr1	22994800	22995399		Chr1	12064400	12064999
Chr1	22999000	22999399		Chr1	12091200	12091599
Chr1	23013000	23013399		Chr1	12101600	12101999
Chr1	23114200	23115599		Chr1	12140400	12141199
Chr1	23133200	23133399		Chr1	12157600	12158799
Chr1	23180200	23180599		Chr1	12169000	12169799
Chr1	23201200	23201399		Chr1	12194800	12195199
Chr1	23228000	23228399		Chr1	12196600	12196999
Chr1	23238000	23238599		Chr1	12198800	12200399
Chr1	23263200	23263799		Chr1	12204400	12204999
Chr1	23333400	23333999		Chr1	12350400	12351199
Chr1	23361000	23361599		Chr1	12351800	12352399
Chr1	23371000	23371399		Chr1	12360200	12360599
Chr1	23377600	23378399		Chr1	12367000	12367999
Chr1	23404200	23404599		Chr1	12381200	12381999
Chr1	23443400	23444199		Chr1	12407400	12407999
Chr1	23509800	23510399		Chr1	12418800	12419599
Chr1	23581600	23581999		Chr1	12420800	12421399
Chr1	23606200	23606799		Chr1	12432000	12432999
Chr1	23640400	23640799		Chr1	12434000	12434399
Chr1	23702400	23702799		Chr1	12441800	12442799
Chr1	23741000	23741799		Chr1	12444800	12445399
Chr1	23761600	23761999		Chr1	12451800	12452599
Chr1	23779000	23779399		Chr1	12485400	12486799
Chr1	23814600	23814999		Chr1	12493600	12494599
Chr1	23825800	23826399		Chr1	12505000	12505399
Chr1	23844200	23844799		Chr1	12514200	12515199
Chr1	23856400	23856999		Chr1	12515800	12516799
Chr1	23873400	23874199		Chr1	12529200	12529599
Chr1	23910800	23911399		Chr1	12531200	12531599
Chr1	23977400	23977599		Chr1	12543400	12543799
Chr1	24018600	24018999		Chr1	12550400	12550999
Chr1	24106200	24106799		Chr1	12565800	12566199
Chr1	24129800	24130799		Chr1	12577800	12578199
Chr1	24226600	24227199		Chr1	12588800	12590199
Chr1	24245600	24245999		Chr1	12600800	12601999
Chr1	24252400	24252999		Chr1	12604800	12605199
Chr1	24307000	24307399		Chr1	12609600	12609999
Chr1	24323000	24323599		Chr1	12629000	12629799
Chr1	24342800	24343199		Chr1	12649800	12650999
Chr1	24361200	24361599		Chr1	12658400	12658799
Chr1	24373000	24373399		Chr1	12747200	12747799
Chr1	24383000	24383599		Chr1	12867800	12868799
Chr1	24552400	24552799		Chr1	12917400	12917799
Chr1	24559800	24560399		Chr1	12930000	12930399
Chr1	24599800	24600599		Chr1	12951200	12952599
Chr1	24609200	24610399		Chr1	12956200	12956799
Chr1	24621200	24622199		Chr1	12969200	12969999
Chr1	24639000	24639399		Chr1	12970800	12971599
Chr1	24640200	24640999		Chr1	12974800	12975599
Chr1	24647200	24647799		Chr1	12977800	12978599
Chr1	24653800	24654199		Chr1	12997200	12997599
Chr1	24696200	24696599		Chr1	12999400	12999999
Chr1	24737800	24739399		Chr1	13002800	13004199
Chr1	24770600	24770999		Chr1	13006600	13006999
Chr1	24777800	24778399		Chr1	13020800	13021399
Chr1	24824400	24824799		Chr1	13023600	13023799
Chr1	24826000	24826599		Chr1	13054200	13054599
Chr1	24868200	24868799		Chr1	13071400	13072199
Chr1	24885000	24886199		Chr1	13085400	13085599
Chr1	24895200	24895799		Chr1	13125000	13125399
Chr1	24935000	24935799		Chr1	13127000	13127799
Chr1	24955000	24955599		Chr1	13149200	13149799
Chr1	25012400	25013199		Chr1	13180800	13180999
Chr1	25146800	25147399		Chr1	13186800	13187199
Chr1	25153200	25153599		Chr1	13205800	13206599
Chr1	25195600	25196399		Chr1	13237400	13237799
Chr1	25216000	25216399		Chr1	13239800	13240199
Chr1	25299800	25300599		Chr1	13272800	13273599
Chr1	25307200	25308199		Chr1	13281400	13281999
Chr1	25313000	25313599		Chr1	13283000	13283399
Chr1	25329800	25330799		Chr1	13287200	13287599
Chr1	25333400	25334199		Chr1	13295000	13295199
Chr1	25343800	25344199		Chr1	13297600	13298999
Chr1	25386600	25386999		Chr1	13321400	13322399
Chr1	25390000	25390399		Chr1	13327600	13328199
Chr1	25391400	25392599		Chr1	13340200	13340399
Chr1	25394800	25395199		Chr1	13341400	13341799
Chr1	25408000	25408399		Chr1	13397200	13397599
Chr1	25422800	25423399		Chr1	13403200	13403999
Chr1	25434000	25434999		Chr1	13420800	13421199
Chr1	25438400	25438799		Chr1	13427000	13427599
Chr1	25474600	25474799		Chr1	13428600	13428999
Chr1	25477000	25477399		Chr1	13433400	13434199
Chr1	25483000	25483999		Chr1	13435800	13436399
Chr1	25491400	25491799		Chr1	13438000	13438599
Chr1	25574000	25574399		Chr1	13445800	13446199
Chr1	25642800	25643199		Chr1	13447200	13447799
Chr1	25648400	25648799		Chr1	13455200	13455599
Chr1	25693400	25693799		Chr1	13472800	13473199
Chr1	25714600	25714999		Chr1	13498800	13499599
Chr1	25736200	25737199		Chr1	13501400	13501999
Chr1	25785800	25786599		Chr1	13507800	13508399
Chr1	25789400	25789999		Chr1	13513800	13515399
Chr1	25797200	25797599		Chr1	13516600	13517599
Chr1	25801800	25802599		Chr1	13533400	13533799
Chr1	25803400	25803799		Chr1	13551800	13552199
Chr1	25804800	25805399		Chr1	13560400	13561199
Chr1	25809400	25810199		Chr1	13568800	13569199
Chr1	25874600	25875199		Chr1	13574200	13574999
Chr1	25957800	25958799		Chr1	13592000	13592399
Chr1	25969400	25969999		Chr1	13604800	13605399
Chr1	25970400	25971199		Chr1	13610600	13610999
Chr1	25991200	25991799		Chr1	13623600	13623999
Chr1	26000000	26000399		Chr1	13626200	13626799
Chr1	26012400	26012799		Chr1	13638800	13639199
Chr1	26024600	26025999		Chr1	13646000	13646599
Chr1	26036000	26036799		Chr1	13653600	13654199
Chr1	26048200	26048599		Chr1	13680600	13680999
Chr1	26057200	26057999		Chr1	13689600	13689999
Chr1	26061600	26061999		Chr1	13697200	13697799
Chr1	26070000	26070799		Chr1	13706600	13706999
Chr1	26098400	26099199		Chr1	13710000	13710799
Chr1	26104400	26105199		Chr1	13727000	13727999
Chr1	26126600	26126999		Chr1	13732000	13732399
Chr1	26197000	26197399		Chr1	13763200	13763799
Chr1	26203400	26203999		Chr1	13772000	13772799
Chr1	26235600	26235999		Chr1	13776600	13777199
Chr1	26256200	26256599		Chr1	13781800	13782199
Chr1	26258400	26259199		Chr1	13831200	13831799
Chr1	26277200	26277599		Chr1	13835200	13835599
Chr1	26278200	26278999		Chr1	13841200	13842199
Chr1	26330200	26330599		Chr1	13843400	13843799
Chr1	26342000	26342599		Chr1	13850400	13851199
Chr1	26346600	26347399		Chr1	13947200	13947799
Chr1	26360200	26361199		Chr1	13948800	13949799
Chr1	26382400	26382999		Chr1	13974000	13974399
Chr1	26412800	26413399		Chr1	13975200	13975599
Chr1	26423800	26424199		Chr1	13979200	13979399
Chr1	26426800	26427199		Chr1	13992200	13992599
Chr1	26431000	26431399		Chr1	14000000	14000799
Chr1	26433600	26434199		Chr1	14029800	14030199
Chr1	26468400	26469199		Chr1	14041000	14041399
Chr1	26494000	26494599		Chr1	14058800	14059399
Chr1	26680000	26680399		Chr1	14062000	14062199
Chr1	26681200	26681599		Chr1	14065800	14067399
Chr1	26735600	26736199		Chr1	14122600	14123199
Chr1	26774200	26774599		Chr1	14133600	14133999
Chr1	26812800	26813199		Chr1	14147600	14147999
Chr1	26826400	26826799		Chr1	14155200	14155799
Chr1	26832800	26833399		Chr1	14170600	14171399
Chr1	26838800	26839399		Chr1	14172000	14172399
Chr1	26892200	26892599		Chr1	14197200	14197999
Chr1	26911200	26911799		Chr1	14204800	14205399
Chr1	26929400	26929999		Chr1	14244200	14245999
Chr1	26961800	26962199		Chr1	14246600	14247599
Chr1	26984000	26984599		Chr1	14249000	14249399
Chr1	27033600	27034399		Chr1	14252000	14252399
Chr1	27093000	27093399		Chr1	14259800	14260399
Chr1	27099400	27099799		Chr1	14265800	14266199
Chr1	27127800	27128599		Chr1	14275000	14275599
Chr1	27145000	27145399		Chr1	14276400	14276999
Chr1	27158400	27158799		Chr1	14331600	14331999
Chr1	27185400	27185799		Chr1	14335000	14335799
Chr1	27209800	27210199		Chr1	14439200	14439999
Chr1	27210600	27210999		Chr1	14441000	14441799
Chr1	27225800	27226199		Chr1	14487600	14488199
Chr1	27265400	27265799		Chr1	14499400	14500399
Chr1	27268200	27268799		Chr1	14506600	14506999
Chr1	27294200	27294799		Chr1	14540200	14540999
Chr1	27400200	27400599		Chr1	14592000	14592999
Chr1	27576400	27576799		Chr1	14923600	14923999
Chr1	27603600	27603999		Chr1	14926200	14926599
Chr1	27677800	27678199		Chr1	15058800	15060199
Chr1	27689600	27689999		Chr1	15087800	15088599
Chr1	27713600	27713799		Chr1	15089000	15089199
Chr1	27779800	27780199		Chr1	15093600	15095599
Chr1	27872400	27872999		Chr1	15099800	15104399
Chr1	27916200	27916599		Chr1	15106800	15107799
Chr1	27920800	27921999		Chr1	15110000	15110199
Chr1	27994000	27994599		Chr1	15135600	15138999
Chr1	28064000	28064399		Chr1	15139600	15141199
Chr1	28098800	28099199		Chr1	15143200	15144399
Chr1	28132600	28132999		Chr1	15147000	15147399
Chr1	28134600	28135199		Chr1	15149000	15149599
Chr1	28145600	28146399		Chr1	15159800	15160599
Chr1	28155200	28155599		Chr1	15178200	15179599
Chr1	28177200	28177799		Chr1	15198200	15199599
Chr1	28206600	28207399		Chr1	15200000	15201199
Chr1	28219600	28220199		Chr1	15202000	15202599
Chr1	28239400	28239799		Chr1	15203000	15205999
Chr1	28264200	28264799		Chr1	15206400	15207199
Chr1	28291400	28291799		Chr1	15207600	15209399
Chr1	28357000	28357399		Chr1	15214200	15214599
Chr1	28372600	28373199		Chr1	15297800	15298199
Chr1	28431400	28431999		Chr1	15415000	15416199
Chr1	28442600	28443199		Chr1	15420800	15422399
Chr1	28446800	28447199		Chr1	15423600	15424799
Chr1	28461800	28462599		Chr1	15426000	15426599
Chr1	28463600	28463999		Chr1	15427800	15428599
Chr1	28550000	28550999		Chr1	15429400	15430399
Chr1	28659600	28659999		Chr1	15431200	15432599
Chr1	28688600	28689399		Chr1	15442200	15442599
Chr1	28703000	28703399		Chr1	15515600	15515999
Chr1	28727200	28727599		Chr1	15535800	15536199
Chr1	28797400	28797999		Chr1	15540800	15542199
Chr1	28814000	28814399		Chr1	15565600	15566399
Chr1	28816600	28821999		Chr1	15572000	15572599
Chr1	28829600	28829999		Chr1	15573000	15573599
Chr1	28838000	28838799		Chr1	15574000	15574599
Chr1	28848200	28848599		Chr1	15578800	15579399
Chr1	28866400	28866799		Chr1	15584200	15584799
Chr1	28895600	28896199		Chr1	15632800	15633399
Chr1	28941000	28941399		Chr1	15667600	15668599
Chr1	28968400	28968999		Chr1	15691000	15691399
Chr1	28990400	28990799		Chr1	15695600	15695999
Chr1	29017800	29018199		Chr1	15700000	15701199
Chr1	29085600	29086199		Chr1	15702600	15702999
Chr1	29135800	29135999		Chr1	15704800	15705599
Chr1	29151000	29152399		Chr1	15709400	15709999
Chr1	29179800	29180999		Chr1	15722600	15723199
Chr1	29192000	29192599		Chr1	15748400	15748799
Chr1	29221000	29221599		Chr1	15766400	15767599
Chr1	29253600	29253999		Chr1	15768200	15768799
Chr1	29277000	29277799		Chr1	15799800	15801599
Chr1	29278200	29278799		Chr1	15804400	15805599
Chr1	29373800	29374199		Chr1	15806600	15807399
Chr1	29392200	29392999		Chr1	15808800	15809599
Chr1	29413200	29413799		Chr1	15814200	15816199
Chr1	29446800	29447399		Chr1	15858200	15858799
Chr1	29448800	29449199		Chr1	15892200	15892799
Chr1	29589800	29590599		Chr1	15898400	15899599
Chr1	29609200	29609599		Chr1	15927000	15927399
Chr1	29617800	29618399		Chr1	15933000	15933999
Chr1	29727800	29728199		Chr1	15951800	15952399
Chr1	29732800	29733599		Chr1	15963600	15964199
Chr1	29743000	29743799		Chr1	15977400	15977999
Chr1	29745800	29746199		Chr1	15978600	15979799
Chr1	29801600	29802399		Chr1	15999800	16000399
Chr1	29807800	29808599		Chr1	16006000	16007199
Chr1	29855600	29855999		Chr1	16010400	16011599
Chr1	29898400	29898999		Chr1	16049400	16049599
Chr1	30012400	30012999		Chr1	16085000	16085799
Chr1	30138200	30138599		Chr1	16086400	16086999
Chr1	30176800	30177199		Chr1	16101600	16102199
Chr1	30189000	30189599		Chr1	16103600	16104399
Chr1	30217200	30217799		Chr1	16107200	16107599
Chr1	30352000	30352599		Chr1	16124000	16125199
Chr1	30368400	30368999		Chr1	16134400	16134999
Chr1	30393000	30393799		Chr1	16136200	16137199
Chr1	30408600	30409399		Chr1	16165600	16166799
Chr2	175200	175599		Chr1	16172400	16172999
Chr2	183200	183399		Chr1	16176200	16176599
Chr2	263400	263799		Chr1	16189400	16190399
Chr2	269000	269999		Chr1	16199600	16200199
Chr2	328200	328599		Chr1	16213200	16213599
Chr2	347000	347599		Chr1	16228400	16228999
Chr2	410600	411199		Chr1	16268000	16268599
Chr2	422400	422799		Chr1	16279600	16280399
Chr2	443600	444399		Chr1	16292200	16292999
Chr2	510200	510599		Chr1	16310400	16311399
Chr2	518200	518799		Chr1	16319200	16319599
Chr2	520600	521599		Chr1	16321200	16321599
Chr2	523600	524199		Chr1	16337400	16338199
Chr2	551200	552599		Chr1	16359000	16359399
Chr2	565400	566199		Chr1	16380200	16380799
Chr2	590400	590999		Chr1	16382000	16382799
Chr2	605000	605599		Chr1	16385600	16387399
Chr2	619400	620199		Chr1	16389200	16389599
Chr2	625800	626199		Chr1	16393200	16393799
Chr2	650000	650599		Chr1	16416600	16417199
Chr2	652800	653399		Chr1	16420000	16420399
Chr2	667200	667999		Chr1	16468400	16468999
Chr2	684600	684999		Chr1	16469400	16469799
Chr2	770000	770799		Chr1	16471400	16471799
Chr2	772800	773199		Chr1	16478800	16479799
Chr2	788200	788799		Chr1	16484800	16485599
Chr2	794200	795399		Chr1	16487200	16487799
Chr2	806600	806999		Chr1	16502000	16502599
Chr2	841600	842199		Chr1	16503800	16504199
Chr2	881200	881599		Chr1	16509800	16510799
Chr2	935400	935999		Chr1	16518200	16518999
Chr2	956600	957399		Chr1	16519600	16519799
Chr2	1028600	1029399		Chr1	16526600	16527199
Chr2	1039400	1040199		Chr1	16530000	16530599
Chr2	1085000	1085799		Chr1	16552400	16552999
Chr2	1150800	1151199		Chr1	16556200	16556999
Chr2	1217600	1217999		Chr1	16570800	16571199
Chr2	1302000	1302599		Chr1	16577400	16578599
Chr2	1327600	1328199		Chr1	16584600	16585199
Chr2	1331600	1332199		Chr1	16610200	16610799
Chr2	1384800	1385199		Chr1	16621000	16621799
Chr2	1412800	1413599		Chr1	16623400	16624199
Chr2	1435200	1436199		Chr1	16631200	16632799
Chr2	1457800	1458999		Chr1	16637400	16637799
Chr2	1481200	1481599		Chr1	16649600	16649799
Chr2	1534600	1534999		Chr1	16654000	16654399
Chr2	1573600	1574199		Chr1	16663200	16663999
Chr2	1611600	1612999		Chr1	16675400	16676199
Chr2	1614600	1615399		Chr1	16688600	16689199
Chr2	1623400	1624199		Chr1	16708200	16708799
Chr2	1649800	1650199		Chr1	16711800	16712199
Chr2	1668200	1668599		Chr1	16739400	16739799
Chr2	1701200	1701599		Chr1	16740600	16741199
Chr2	1715800	1716399		Chr1	16744200	16745199
Chr2	1747200	1748399		Chr1	16745600	16745999
Chr2	1762600	1762799		Chr1	16775800	16776199
Chr2	1765200	1765799		Chr1	16809600	16810399
Chr2	1802200	1803399		Chr1	16813600	16814599
Chr2	1875400	1875599		Chr1	16850800	16851199
Chr2	1896400	1896999		Chr1	16855000	16855399
Chr2	1935800	1936399		Chr1	16857000	16857999
Chr2	1943800	1944399		Chr1	16886000	16886399
Chr2	2097000	2098199		Chr1	16887200	16888199
Chr2	2114200	2114999		Chr1	16898200	16898599
Chr2	2122600	2122999		Chr1	16908200	16908799
Chr2	2123800	2124399		Chr1	16924000	16924599
Chr2	2134200	2134599		Chr1	16926400	16926799
Chr2	2141000	2141799		Chr1	16941800	16942199
Chr2	2190600	2191199		Chr1	16970800	16971199
Chr2	2207200	2207599		Chr1	16982200	16982599
Chr2	2216600	2216999		Chr1	16991400	16992199
Chr2	2218200	2218799		Chr1	16995600	16996199
Chr2	2221200	2221999		Chr1	17007400	17007999
Chr2	2270800	2271399		Chr1	17055000	17056399
Chr2	2271800	2272599		Chr1	17075400	17075999
Chr2	2294800	2295399		Chr1	17098600	17099199
Chr2	2326200	2326799		Chr1	17177800	17178199
Chr2	2328400	2329199		Chr1	17180800	17181599
Chr2	2347800	2348199		Chr1	17224600	17224999
Chr2	2354600	2355199		Chr1	17233800	17234199
Chr2	2384000	2385399		Chr1	17234800	17235399
Chr2	2388600	2389199		Chr1	17295600	17296199
Chr2	2426200	2426599		Chr1	17297200	17298399
Chr2	2446200	2446999		Chr1	17301800	17302199
Chr2	2473200	2473799		Chr1	17313400	17313999
Chr2	2562200	2562799		Chr1	17319600	17320199
Chr2	2585400	2585799		Chr1	17339600	17340199
Chr2	2604000	2604399		Chr1	17341600	17342799
Chr2	2621200	2621599		Chr1	17351400	17351999
Chr2	2634600	2634799		Chr1	17353600	17354799
Chr2	2640200	2640599		Chr1	17358600	17359599
Chr2	2663000	2663199		Chr1	17419000	17419399
Chr2	2680000	2680399		Chr1	17424400	17424999
Chr2	2692000	2692599		Chr1	17428800	17430599
Chr2	2716800	2717399		Chr1	17432200	17432799
Chr2	2721800	2722399		Chr1	17452400	17453199
Chr2	2741400	2741799		Chr1	17464000	17464399
Chr2	2758400	2758799		Chr1	17473600	17474399
Chr2	2859800	2860399		Chr1	17476000	17476599
Chr2	2944600	2945199		Chr1	17484800	17485599
Chr2	3030200	3030799		Chr1	17487200	17487599
Chr2	3072000	3072799		Chr1	17497400	17497799
Chr2	3073200	3073799		Chr1	17503000	17503599
Chr2	3086200	3086599		Chr1	17534600	17534999
Chr2	3087200	3087799		Chr1	17558800	17559399
Chr2	3125800	3126399		Chr1	17569200	17569999
Chr2	3181400	3181999		Chr1	17582200	17582599
Chr2	3182600	3183199		Chr1	17584800	17585199
Chr2	3184200	3184799		Chr1	17588400	17588999
Chr2	3185600	3185999		Chr1	17590000	17590599
Chr2	3529000	3530399		Chr1	17610800	17611599
Chr2	3547200	3547799		Chr1	17614000	17614399
Chr2	3575200	3575799		Chr1	17634600	17635199
Chr2	3588200	3588799		Chr1	17676000	17676399
Chr2	3589200	3589799		Chr1	17679000	17679399
Chr2	3604400	3604999		Chr1	17687400	17688799
Chr2	3642000	3642599		Chr1	17718200	17718399
Chr2	3649600	3650799		Chr1	17721200	17721599
Chr2	3774200	3774599		Chr1	17723200	17724399
Chr2	3812000	3812599		Chr1	17758000	17758199
Chr2	3818200	3818999		Chr1	17766800	17766999
Chr2	3825800	3826199		Chr1	17769600	17770199
Chr2	3830400	3830799		Chr1	17778400	17779199
Chr2	3853200	3853599		Chr1	17782200	17782399
Chr2	3868600	3869599		Chr1	17782800	17783799
Chr2	3875400	3875999		Chr1	17784200	17785199
Chr2	3901000	3901799		Chr1	17847200	17848399
Chr2	3907800	3908199		Chr1	17892000	17892399
Chr2	3969800	3970399		Chr1	17898200	17898799
Chr2	4040400	4040999		Chr1	17905400	17905799
Chr2	4134000	4134399		Chr1	17915200	17915999
Chr2	4156400	4156999		Chr1	17918400	17918599
Chr2	4159600	4159799		Chr1	17919400	17919999
Chr2	4232000	4232399		Chr1	17940600	17940999
Chr2	4284800	4285599		Chr1	17976000	17976599
Chr2	4292200	4292999		Chr1	18040400	18040999
Chr2	4301600	4302199		Chr1	18060800	18061199
Chr2	4337600	4338199		Chr1	18073800	18074599
Chr2	4344400	4344799		Chr1	18081400	18081799
Chr2	4349000	4349999		Chr1	18095600	18095999
Chr2	4371800	4372399		Chr1	18097800	18098399
Chr2	4373000	4373799		Chr1	18101000	18101399
Chr2	4393200	4393599		Chr1	18104600	18104999
Chr2	4416000	4416399		Chr1	18117800	18118199
Chr2	4438800	4439599		Chr1	18121400	18121799
Chr2	4491200	4491599		Chr1	18128800	18129399
Chr2	4532600	4533199		Chr1	18159200	18159599
Chr2	4539400	4539799		Chr1	18203200	18203599
Chr2	4597800	4598399		Chr1	18221800	18222199
Chr2	4624200	4624799		Chr1	18229800	18230199
Chr2	4633800	4635199		Chr1	18235000	18235599
Chr2	4643000	4644399		Chr1	18310400	18311199
Chr2	4657000	4658399		Chr1	18313400	18313799
Chr2	4727600	4727999		Chr1	18317600	18318799
Chr2	4802800	4803599		Chr1	18319600	18320599
Chr2	4805600	4807199		Chr1	18328200	18328599
Chr2	4820000	4820399		Chr1	18351400	18351599
Chr2	4901800	4902799		Chr1	18359600	18360599
Chr2	4906200	4906799		Chr1	18378800	18379599
Chr2	4993000	4993399		Chr1	18412400	18412999
Chr2	5000800	5000999		Chr1	18448600	18448999
Chr2	5028600	5028999		Chr1	18456200	18456799
Chr2	5053400	5053999		Chr1	18470200	18471399
Chr2	5057800	5058399		Chr1	18491400	18491999
Chr2	5090200	5090599		Chr1	18517800	18518399
Chr2	5124600	5125199		Chr1	18519200	18519999
Chr2	5131800	5132199		Chr1	18530800	18531199
Chr2	5143400	5143799		Chr1	18618600	18619399
Chr2	5150600	5151399		Chr1	18621600	18622199
Chr2	5192600	5193199		Chr1	18622600	18622999
Chr2	5203000	5203799		Chr1	18627800	18628199
Chr2	5216200	5216999		Chr1	18678000	18678399
Chr2	5220200	5221599		Chr1	18692800	18693199
Chr2	5277400	5278199		Chr1	18693800	18694399
Chr2	5289600	5289999		Chr1	18727200	18727799
Chr2	5290400	5291599		Chr1	18744200	18744599
Chr2	5331400	5331799		Chr1	18763600	18764399
Chr2	5335200	5335799		Chr1	18782600	18783999
Chr2	5337200	5337799		Chr1	18821600	18821999
Chr2	5339000	5339599		Chr1	18840000	18840399
Chr2	5390200	5390999		Chr1	18849600	18849999
Chr2	5425400	5425799		Chr1	18870200	18870599
Chr2	5455000	5456199		Chr1	18895000	18895399
Chr2	5524600	5524999		Chr1	18929800	18930399
Chr2	5528000	5528399		Chr1	18950200	18950599
Chr2	5586800	5588999		Chr1	18960000	18960399
Chr2	5599600	5600399		Chr1	18984600	18985199
Chr2	5607800	5608799		Chr1	18988600	18988999
Chr2	5648800	5649799		Chr1	18991800	18992399
Chr2	5671600	5672199		Chr1	19021400	19021999
Chr2	5715000	5715599		Chr1	19041400	19042199
Chr2	5723000	5723799		Chr1	19058000	19058399
Chr2	5729800	5729999		Chr1	19070800	19071399
Chr2	5744000	5744399		Chr1	19075000	19075799
Chr2	5752600	5752999		Chr1	19103800	19104999
Chr2	5779400	5780799		Chr1	19118600	19118999
Chr2	5786800	5787199		Chr1	19121000	19121599
Chr2	5798400	5798799		Chr1	19125800	19126399
Chr2	5812600	5814199		Chr1	19132000	19133399
Chr2	5861800	5862399		Chr1	19136800	19137599
Chr2	5886800	5887799		Chr1	19160800	19161399
Chr2	5945000	5945599		Chr1	19199800	19200999
Chr2	5968800	5969799		Chr1	19216600	19216999
Chr2	5983600	5984199		Chr1	19280800	19281999
Chr2	5990200	5990999		Chr1	19297600	19298199
Chr2	6029800	6030199		Chr1	19312800	19313399
Chr2	6058400	6058799		Chr1	19315400	19315799
Chr2	6079000	6079799		Chr1	19326200	19326599
Chr2	6148800	6149199		Chr1	19334800	19335199
Chr2	6190600	6191199		Chr1	19413800	19414399
Chr2	6207200	6208599		Chr1	19422000	19422399
Chr2	6212800	6213199		Chr1	19423400	19423799
Chr2	6223200	6223999		Chr1	19485200	19485599
Chr2	6235400	6236399		Chr1	19490000	19490799
Chr2	6254600	6255599		Chr1	19503000	19504199
Chr2	6263200	6263999		Chr1	19506400	19506799
Chr2	6272800	6273199		Chr1	19528400	19529599
Chr2	6287200	6287999		Chr1	19566200	19566799
Chr2	6294200	6294599		Chr1	19570000	19570999
Chr2	6306000	6306599		Chr1	19603400	19604599
Chr2	6320600	6321199		Chr1	19608600	19609799
Chr2	6399400	6399999		Chr1	19613600	19614799
Chr2	6472200	6472599		Chr1	19617000	19617599
Chr2	6491600	6492199		Chr1	19645400	19646399
Chr2	6495200	6495799		Chr1	19710200	19710799
Chr2	6521200	6521599		Chr1	19744000	19744599
Chr2	6528600	6528999		Chr1	19745600	19746799
Chr2	6601200	6601599		Chr1	19758800	19759399
Chr2	6609000	6609599		Chr1	19772400	19773199
Chr2	6638200	6639199		Chr1	19790800	19791799
Chr2	6648400	6648999		Chr1	19855400	19855799
Chr2	6743800	6744799		Chr1	19859400	19860199
Chr2	6810400	6811399		Chr1	19879400	19879799
Chr2	6858400	6858999		Chr1	19916000	19916999
Chr2	6918000	6918999		Chr1	19928800	19928999
Chr2	6920000	6920999		Chr1	19955200	19956199
Chr2	6951400	6952999		Chr1	19972800	19973199
Chr2	6977800	6978199		Chr1	19978800	19979999
Chr2	6988000	6988399		Chr1	20001800	20002199
Chr2	7039400	7039799		Chr1	20014400	20014799
Chr2	7083600	7083999		Chr1	20027600	20027799
Chr2	7097600	7098399		Chr1	20042400	20042799
Chr2	7143400	7144799		Chr1	20059200	20059599
Chr2	7148200	7148799		Chr1	20098600	20098999
Chr2	7160200	7160599		Chr1	20103800	20104199
Chr2	7181800	7182199		Chr1	20179600	20179999
Chr2	7214200	7215599		Chr1	20185400	20185799
Chr2	7231800	7232399		Chr1	20186200	20186999
Chr2	7248600	7249399		Chr1	20188800	20189399
Chr2	7274600	7274999		Chr1	20189800	20190199
Chr2	7278000	7278999		Chr1	20202600	20202999
Chr2	7280600	7281199		Chr1	20225200	20225799
Chr2	7313200	7314599		Chr1	20235600	20236199
Chr2	7318400	7318999		Chr1	20271600	20272199
Chr2	7325400	7326599		Chr1	20277600	20277999
Chr2	7327800	7328799		Chr1	20289600	20289999
Chr2	7338200	7338999		Chr1	20291400	20291999
Chr2	7346600	7347199		Chr1	20296600	20296999
Chr2	7399400	7399999		Chr1	20299600	20300599
Chr2	7445000	7445199		Chr1	20310200	20310599
Chr2	7486400	7487399		Chr1	20334000	20334599
Chr2	7494800	7495199		Chr1	20337000	20337399
Chr2	7495800	7496199		Chr1	20342800	20343199
Chr2	7498600	7498999		Chr1	20350400	20351199
Chr2	7545200	7545799		Chr1	20389400	20389999
Chr2	7547200	7547999		Chr1	20396000	20396999
Chr2	7593000	7593599		Chr1	20413600	20414199
Chr2	7624000	7625199		Chr1	20425400	20425799
Chr2	7630400	7630799		Chr1	20439400	20439799
Chr2	7667200	7667799		Chr1	20447200	20447599
Chr2	7675200	7675599		Chr1	20505000	20505799
Chr2	7704600	7705199		Chr1	20534800	20535599
Chr2	7713800	7714199		Chr1	20538400	20538999
Chr2	7752800	7753399		Chr1	20541800	20542599
Chr2	7756600	7757199		Chr1	20553800	20554199
Chr2	7764400	7764999		Chr1	20617200	20617599
Chr2	7767400	7767799		Chr1	20652200	20653199
Chr2	7820400	7820999		Chr1	20655600	20655999
Chr2	7874200	7875199		Chr1	20659000	20659199
Chr2	7916400	7917199		Chr1	20668600	20668999
Chr2	7931400	7931799		Chr1	20682400	20682799
Chr2	7933000	7933799		Chr1	20701200	20701799
Chr2	7996200	7996799		Chr1	20702800	20703399
Chr2	8016600	8017399		Chr1	20708000	20708799
Chr2	8040200	8040799		Chr1	20725200	20725999
Chr2	8042200	8043399		Chr1	20743200	20743799
Chr2	8119400	8119999		Chr1	20764000	20764399
Chr2	8125800	8126399		Chr1	20772200	20772599
Chr2	8151800	8152199		Chr1	20805600	20805999
Chr2	8196400	8197199		Chr1	20807000	20807799
Chr2	8205400	8206399		Chr1	20848800	20849199
Chr2	8266600	8267199		Chr1	20866600	20866999
Chr2	8268000	8268599		Chr1	20870400	20870999
Chr2	8317600	8318199		Chr1	20878000	20878999
Chr2	8340800	8341199		Chr1	20885400	20885799
Chr2	8435600	8435999		Chr1	20892400	20892799
Chr2	8468000	8468599		Chr1	20942600	20943199
Chr2	8492200	8492599		Chr1	20957000	20957799
Chr2	8500000	8500599		Chr1	20966600	20966799
Chr2	8655400	8655999		Chr1	20967800	20968199
Chr2	8762400	8763599		Chr1	20977000	20977599
Chr2	8766800	8767399		Chr1	20984400	20984999
Chr2	8805600	8806199		Chr1	21023200	21024199
Chr2	8820800	8821599		Chr1	21035600	21035999
Chr2	8955200	8955799		Chr1	21075600	21076399
Chr2	9004000	9004399		Chr1	21093400	21093799
Chr2	9036800	9037399		Chr1	21142200	21142599
Chr2	9089200	9089999		Chr1	21180400	21180999
Chr2	9171400	9171999		Chr1	21193000	21193599
Chr2	9249600	9250199		Chr1	21197000	21197799
Chr2	9265400	9266199		Chr1	21207400	21207799
Chr2	9282200	9282799		Chr1	21212800	21213199
Chr2	9283600	9284599		Chr1	21238800	21240399
Chr2	9321400	9321999		Chr1	21242000	21242399
Chr2	9328200	9328999		Chr1	21254000	21254799
Chr2	9329400	9329799		Chr1	21364000	21364799
Chr2	9353400	9354199		Chr1	21371200	21371999
Chr2	9360800	9361799		Chr1	21395600	21397599
Chr2	9373200	9373599		Chr1	21411000	21411999
Chr2	9377400	9377799		Chr1	21417000	21417799
Chr2	9381600	9381999		Chr1	21436200	21436999
Chr2	9387400	9387999		Chr1	21437600	21438199
Chr2	9388400	9389599		Chr1	21439400	21439999
Chr2	9391800	9392599		Chr1	21441600	21442199
Chr2	9496000	9496799		Chr1	21467200	21467599
Chr2	9509400	9510199		Chr1	21504400	21504999
Chr2	9512800	9513399		Chr1	21510600	21511399
Chr2	9543200	9543799		Chr1	21512400	21512799
Chr2	9546200	9546599		Chr1	21520800	21520999
Chr2	9548600	9548799		Chr1	21521800	21522399
Chr2	9569200	9569799		Chr1	21552000	21552599
Chr2	9594000	9594399		Chr1	21554000	21554599
Chr2	9596800	9597399		Chr1	21556800	21557199
Chr2	9600200	9600599		Chr1	21561400	21562199
Chr2	9652800	9653399		Chr1	21601000	21601799
Chr2	9693400	9694199		Chr1	21629200	21629999
Chr2	9697600	9699599		Chr1	21687600	21688399
Chr2	9826000	9826399		Chr1	21733400	21734199
Chr2	9987200	9987799		Chr1	21859600	21860399
Chr2	9996000	9996599		Chr1	21891200	21891599
Chr2	10021000	10021999		Chr1	21893200	21893999
Chr2	10036200	10036599		Chr1	21926800	21927799
Chr2	10041200	10041799		Chr1	21940400	21941399
Chr2	10072600	10073199		Chr1	21950600	21950799
Chr2	10108200	10108399		Chr1	21966600	21966999
Chr2	10121800	10122199		Chr1	21979400	21980199
Chr2	10140800	10141599		Chr1	22011600	22012199
Chr2	10276000	10276399		Chr1	22044400	22045199
Chr2	10329600	10330199		Chr1	22055800	22056599
Chr2	10366200	10366999		Chr1	22074200	22074799
Chr2	10391200	10391799		Chr1	22091800	22092399
Chr2	10402000	10402399		Chr1	22102200	22102999
Chr2	10406000	10406599		Chr1	22104800	22105399
Chr2	10411600	10411999		Chr1	22107800	22107999
Chr2	10449800	10450399		Chr1	22153400	22153999
Chr2	10541000	10541399		Chr1	22172600	22172799
Chr2	10606600	10607199		Chr1	22198000	22198599
Chr2	10609600	10610399		Chr1	22202000	22202599
Chr2	10622400	10622799		Chr1	22203800	22204799
Chr2	10623600	10624199		Chr1	22245000	22245599
Chr2	10628000	10628399		Chr1	22262000	22262599
Chr2	10662000	10662399		Chr1	22288600	22289199
Chr2	10675400	10675999		Chr1	22296800	22297799
Chr2	10684200	10685199		Chr1	22307200	22307999
Chr2	10726000	10726399		Chr1	22312400	22312999
Chr2	10767600	10767999		Chr1	22315800	22316199
Chr2	10812000	10812399		Chr1	22396000	22396399
Chr2	10814400	10814799		Chr1	22415600	22416999
Chr2	10823000	10823799		Chr1	22424400	22425599
Chr2	10832800	10833599		Chr1	22439400	22439599
Chr2	10863600	10863999		Chr1	22479200	22479999
Chr2	10915200	10915999		Chr1	22483200	22483599
Chr2	10929200	10930399		Chr1	22494600	22495199
Chr2	10933200	10934199		Chr1	22514200	22514799
Chr2	10972000	10972399		Chr1	22554200	22554799
Chr2	10989400	10989799		Chr1	22556800	22557399
Chr2	11000600	11001199		Chr1	22561800	22562199
Chr2	11020800	11021599		Chr1	22589200	22589799
Chr2	11054400	11054999		Chr1	22610600	22610999
Chr2	11059200	11059799		Chr1	22633800	22635199
Chr2	11074000	11074999		Chr1	22640600	22640999
Chr2	11077600	11078199		Chr1	22695800	22696199
Chr2	11112600	11113199		Chr1	22703000	22703599
Chr2	11241400	11241799		Chr1	22704000	22704599
Chr2	11247200	11247799		Chr1	22730600	22731199
Chr2	11275000	11275799		Chr1	22747600	22747799
Chr2	11289400	11290199		Chr1	22793400	22793999
Chr2	11328400	11328799		Chr1	22813200	22813799
Chr2	11344400	11345399		Chr1	22824200	22824599
Chr2	11403800	11404599		Chr1	22854600	22855199
Chr2	11426600	11427799		Chr1	22865600	22865999
Chr2	11433000	11433799		Chr1	22866400	22866799
Chr2	11496600	11497199		Chr1	22888000	22888799
Chr2	11546000	11546799		Chr1	22922400	22923199
Chr2	11551400	11552199		Chr1	22969600	22970199
Chr2	11566200	11566999		Chr1	22994800	22995399
Chr2	11570800	11571999		Chr1	22998800	22999399
Chr2	11630600	11630999		Chr1	23003600	23003999
Chr2	11636400	11637399		Chr1	23036000	23036799
Chr2	11645000	11645399		Chr1	23068000	23068399
Chr2	11646200	11646799		Chr1	23114200	23115399
Chr2	11669600	11671199		Chr1	23133000	23133599
Chr2	11678800	11679399		Chr1	23180000	23180599
Chr2	11684000	11684999		Chr1	23228000	23228599
Chr2	11702600	11702999		Chr1	23238000	23238599
Chr2	11713400	11715599		Chr1	23263200	23263799
Chr2	11720600	11720999		Chr1	23266000	23266399
Chr2	11741000	11741399		Chr1	23281000	23281599
Chr2	11745200	11745999		Chr1	23284800	23285199
Chr2	11747000	11747599		Chr1	23329600	23329999
Chr2	11799200	11800199		Chr1	23333600	23334999
Chr2	11817200	11818199		Chr1	23361000	23361599
Chr2	11818800	11819199		Chr1	23371000	23371399
Chr2	11825200	11825599		Chr1	23377400	23378399
Chr2	11849800	11850199		Chr1	23399400	23399799
Chr2	11852800	11853199		Chr1	23404200	23404599
Chr2	11919000	11919599		Chr1	23443400	23444199
Chr2	11924200	11924599		Chr1	23465600	23465999
Chr2	11938400	11939199		Chr1	23509800	23510399
Chr2	12002400	12002799		Chr1	23575400	23575799
Chr2	12041000	12041799		Chr1	23581600	23581999
Chr2	12105000	12105399		Chr1	23606000	23606999
Chr2	12128600	12129399		Chr1	23615200	23615799
Chr2	12131600	12131999		Chr1	23620000	23620999
Chr2	12159600	12159999		Chr1	23640400	23640799
Chr2	12164800	12165399		Chr1	23702200	23702799
Chr2	12172200	12172999		Chr1	23711800	23712799
Chr2	12180600	12181399		Chr1	23730000	23730999
Chr2	12227200	12227799		Chr1	23741000	23741599
Chr2	12249600	12250599		Chr1	23761600	23761999
Chr2	12277000	12277399		Chr1	23762600	23762999
Chr2	12277800	12278599		Chr1	23765400	23765599
Chr2	12289200	12289799		Chr1	23770200	23770599
Chr2	12290800	12291199		Chr1	23774400	23775199
Chr2	12303000	12303599		Chr1	23778400	23779399
Chr2	12326800	12327799		Chr1	23803800	23804199
Chr2	12369800	12370199		Chr1	23806000	23806799
Chr2	12406600	12406999		Chr1	23821400	23822399
Chr2	12416000	12416799		Chr1	23825800	23826399
Chr2	12419000	12419599		Chr1	23826800	23827199
Chr2	12427600	12428199		Chr1	23837200	23837599
Chr2	12471800	12472799		Chr1	23844200	23844599
Chr2	12499000	12499399		Chr1	23851400	23851799
Chr2	12552400	12553399		Chr1	23869200	23869599
Chr2	12557400	12557799		Chr1	23873200	23873999
Chr2	12612200	12612799		Chr1	23888800	23888999
Chr2	12617800	12618599		Chr1	23899600	23900799
Chr2	12651000	12651399		Chr1	23911000	23911599
Chr2	12680200	12680599		Chr1	23945200	23945599
Chr2	12694000	12694999		Chr1	23953800	23954399
Chr2	12715600	12716599		Chr1	23977400	23977799
Chr2	12737200	12737599		Chr1	24018400	24018999
Chr2	12777400	12777799		Chr1	24062400	24062799
Chr2	12837800	12838199		Chr1	24085200	24085599
Chr2	12848200	12848799		Chr1	24106000	24106799
Chr2	12861200	12861599		Chr1	24129800	24130799
Chr2	12873200	12873799		Chr1	24155800	24157399
Chr2	12875600	12876799		Chr1	24163000	24163799
Chr2	12878600	12879399		Chr1	24171200	24171799
Chr2	12884800	12885599		Chr1	24226400	24227399
Chr2	12937200	12937599		Chr1	24245200	24245999
Chr2	12941800	12942599		Chr1	24247800	24248199
Chr2	12980600	12981199		Chr1	24252200	24252999
Chr2	12995800	12996199		Chr1	24284600	24285199
Chr2	13018400	13018999		Chr1	24305400	24305799
Chr2	13037200	13037599		Chr1	24306800	24307399
Chr2	13044800	13045199		Chr1	24323000	24323599
Chr2	13177800	13178199		Chr1	24361200	24361799
Chr2	13193800	13194599		Chr1	24373000	24373399
Chr2	13200000	13200399		Chr1	24382600	24383599
Chr2	13232800	13233599		Chr1	24417200	24417399
Chr2	13264600	13264999		Chr1	24437800	24437999
Chr2	13318600	13319199		Chr1	24440600	24440999
Chr2	13392200	13392599		Chr1	24450600	24450799
Chr2	13461600	13461999		Chr1	24457400	24457999
Chr2	13499600	13499999		Chr1	24474000	24474399
Chr2	13506800	13507199		Chr1	24477800	24477999
Chr2	13538800	13539399		Chr1	24559800	24560599
Chr2	13546200	13546599		Chr1	24575000	24575399
Chr2	13613400	13613999		Chr1	24599800	24600599
Chr2	13651400	13651799		Chr1	24601000	24601199
Chr2	13680600	13680999		Chr1	24609200	24610399
Chr2	13694200	13694599		Chr1	24621200	24622199
Chr2	13712800	13713199		Chr1	24632600	24633599
Chr2	13727000	13727599		Chr1	24638200	24638399
Chr2	13736800	13737599		Chr1	24639000	24639599
Chr2	13759200	13760199		Chr1	24640200	24640999
Chr2	13781000	13781399		Chr1	24647200	24647599
Chr2	13790000	13790399		Chr1	24653000	24653199
Chr2	13798600	13799199		Chr1	24653800	24654199
Chr2	13824000	13824399		Chr1	24696200	24696599
Chr2	13845200	13846399		Chr1	24737800	24739399
Chr2	13863800	13864199		Chr1	24777800	24778599
Chr2	13967800	13968199		Chr1	24815400	24815999
Chr2	14041600	14042799		Chr1	24821600	24821999
Chr2	14044600	14045199		Chr1	24824400	24824799
Chr2	14110800	14111199		Chr1	24826000	24826599
Chr2	14115800	14116199		Chr1	24849200	24849599
Chr2	14153400	14153999		Chr1	24850200	24850599
Chr2	14156800	14157399		Chr1	24853400	24853799
Chr2	14181600	14182199		Chr1	24868200	24868799
Chr2	14192800	14193399		Chr1	24885000	24886199
Chr2	14208000	14208599		Chr1	24895200	24895799
Chr2	14287800	14288599		Chr1	24915600	24916199
Chr2	14301200	14302399		Chr1	24935000	24935799
Chr2	14321400	14322399		Chr1	24954600	24955599
Chr2	14361600	14361999		Chr1	24967200	24967599
Chr2	14441200	14441599		Chr1	25022000	25022599
Chr2	14513200	14513599		Chr1	25072200	25072399
Chr2	14516800	14517599		Chr1	25088600	25089399
Chr2	14563800	14564199		Chr1	25146800	25147399
Chr2	14596800	14597399		Chr1	25153000	25153999
Chr2	14605000	14605999		Chr1	25159400	25160199
Chr2	14778200	14778599		Chr1	25195600	25196399
Chr2	14789600	14789999		Chr1	25216000	25216199
Chr2	14796200	14796799		Chr1	25262200	25262799
Chr2	14802600	14802999		Chr1	25264600	25265399
Chr2	14828000	14828999		Chr1	25277400	25277999
Chr2	14869400	14869999		Chr1	25298800	25299199
Chr2	14882400	14882999		Chr1	25299800	25300399
Chr2	14927600	14928399		Chr1	25307400	25308999
Chr2	14972800	14973199		Chr1	25313000	25313399
Chr2	14983800	14984599		Chr1	25322600	25323199
Chr2	14998200	14998599		Chr1	25329800	25330799
Chr2	15049600	15050199		Chr1	25333200	25334199
Chr2	15059800	15060399		Chr1	25343800	25344199
Chr2	15073400	15073999		Chr1	25386000	25386999
Chr2	15117000	15117799		Chr1	25390000	25390399
Chr2	15119000	15119799		Chr1	25391400	25392599
Chr2	15136400	15136999		Chr1	25394800	25395199
Chr2	15159200	15159599		Chr1	25408000	25408999
Chr2	15165600	15166199		Chr1	25422800	25423399
Chr2	15173600	15174199		Chr1	25430200	25430999
Chr2	15205400	15205799		Chr1	25434000	25434999
Chr2	15213000	15213799		Chr1	25438200	25438999
Chr2	15234000	15234599		Chr1	25468200	25468599
Chr2	15236800	15237199		Chr1	25474600	25474999
Chr2	15238400	15238799		Chr1	25475800	25477399
Chr2	15288200	15288999		Chr1	25483000	25483999
Chr2	15298200	15298599		Chr1	25491400	25491799
Chr2	15360400	15361199		Chr1	25515600	25516199
Chr2	15391000	15391399		Chr1	25520800	25520999
Chr2	15447600	15448199		Chr1	25524600	25525399
Chr2	15556400	15556999		Chr1	25553400	25553599
Chr2	15560400	15560599		Chr1	25642800	25643199
Chr2	15616400	15616999		Chr1	25646400	25646799
Chr2	15620400	15620999		Chr1	25648200	25648799
Chr2	15635400	15635799		Chr1	25684400	25684999
Chr2	15636200	15636999		Chr1	25693400	25693799
Chr2	15638400	15638999		Chr1	25714400	25714999
Chr2	15671600	15672199		Chr1	25735400	25737999
Chr2	15696200	15696599		Chr1	25771200	25771999
Chr2	15717800	15718599		Chr1	25785800	25786599
Chr2	15743800	15744399		Chr1	25789400	25789999
Chr2	15764200	15764999		Chr1	25796400	25796799
Chr2	15766200	15766799		Chr1	25797200	25797599
Chr2	15776000	15776599		Chr1	25801800	25802399
Chr2	15854800	15855199		Chr1	25803400	25803799
Chr2	15857200	15857399		Chr1	25804800	25805399
Chr2	15869200	15869599		Chr1	25809400	25810199
Chr2	15880400	15881199		Chr1	25836600	25837399
Chr2	15955400	15955799		Chr1	25866000	25866999
Chr2	15976200	15977199		Chr1	25874600	25875199
Chr2	16012200	16012399		Chr1	25909000	25909799
Chr2	16019000	16019599		Chr1	25933000	25933999
Chr2	16059400	16059799		Chr1	25939800	25940799
Chr2	16225600	16226799		Chr1	25948600	25949799
Chr2	16233600	16234199		Chr1	25957600	25958799
Chr2	16288200	16288599		Chr1	25967600	25968399
Chr2	16322200	16322599		Chr1	25969400	25971199
Chr2	16346400	16346799		Chr1	25991400	25991799
Chr2	16375400	16375999		Chr1	26000000	26000599
Chr2	16382200	16382999		Chr1	26016000	26017199
Chr2	16392600	16393199		Chr1	26024600	26025199
Chr2	16417400	16417999		Chr1	26025600	26026199
Chr2	16450600	16451599		Chr1	26032800	26033599
Chr2	16463200	16463599		Chr1	26048200	26048599
Chr2	16540000	16540399		Chr1	26057200	26057999
Chr2	16573200	16573399		Chr1	26061600	26061999
Chr2	16577000	16577599		Chr1	26063800	26065199
Chr2	16597400	16597999		Chr1	26070000	26070999
Chr2	16623200	16623999		Chr1	26097800	26099199
Chr2	16648600	16649199		Chr1	26104400	26105199
Chr2	16797000	16797599		Chr1	26126600	26126999
Chr2	16811600	16812599		Chr1	26147000	26147599
Chr2	16850000	16850399		Chr1	26171600	26171999
Chr2	16855800	16856399		Chr1	26187400	26187999
Chr2	16859000	16859399		Chr1	26194800	26195799
Chr2	16929800	16929999		Chr1	26197000	26197399
Chr2	16963600	16963999		Chr1	26203400	26203799
Chr2	16987400	16988399		Chr1	26205000	26205599
Chr2	17002400	17002599		Chr1	26216400	26216999
Chr2	17021800	17022199		Chr1	26235600	26235999
Chr2	17035000	17035399		Chr1	26258600	26259399
Chr2	17100200	17100399		Chr1	26275200	26275799
Chr2	17362200	17362999		Chr1	26277200	26277599
Chr2	17393800	17394199		Chr1	26278200	26278999
Chr2	17402400	17402799		Chr1	26292200	26293199
Chr2	17406200	17406599		Chr1	26296600	26296999
Chr2	17422000	17422399		Chr1	26330200	26330599
Chr2	17503400	17503799		Chr1	26335200	26335599
Chr2	17507600	17508199		Chr1	26342200	26343199
Chr2	17537600	17537999		Chr1	26346600	26347399
Chr2	17544600	17545399		Chr1	26360400	26361399
Chr2	17577000	17577599		Chr1	26382400	26382999
Chr2	17583400	17583999		Chr1	26393800	26394199
Chr2	17604800	17605599		Chr1	26404400	26404599
Chr2	17622800	17623199		Chr1	26412800	26413399
Chr2	17633600	17633999		Chr1	26420400	26421599
Chr2	17643800	17644399		Chr1	26423800	26424199
Chr2	17648000	17648999		Chr1	26426800	26427399
Chr2	17711400	17711999		Chr1	26430800	26431399
Chr2	17714800	17715399		Chr1	26433200	26434199
Chr2	17716200	17716599		Chr1	26450000	26450999
Chr2	17737800	17738399		Chr1	26486400	26486599
Chr2	17766000	17766599		Chr1	26494000	26494599
Chr2	17809000	17809999		Chr1	26502200	26503799
Chr2	17816000	17816399		Chr1	26546000	26546399
Chr2	17826800	17827399		Chr1	26565200	26565799
Chr2	17835000	17835599		Chr1	26571400	26572199
Chr2	17859200	17859599		Chr1	26618800	26619599
Chr2	17892200	17892599		Chr1	26626600	26626999
Chr2	17902200	17902599		Chr1	26629200	26629999
Chr2	17919600	17920199		Chr1	26639800	26639999
Chr2	17958200	17958599		Chr1	26652000	26652399
Chr2	18145400	18146199		Chr1	26680000	26680399
Chr2	18164400	18164799		Chr1	26681000	26681599
Chr2	18205600	18205999		Chr1	26689400	26689999
Chr2	18212800	18213199		Chr1	26812400	26813599
Chr2	18241600	18242599		Chr1	26826400	26826999
Chr2	18277200	18277999		Chr1	26831000	26831599
Chr2	18279000	18280199		Chr1	26832600	26833199
Chr2	18297400	18297799		Chr1	26850200	26850799
Chr2	18374000	18374399		Chr1	26892200	26892799
Chr2	18427400	18427799		Chr1	26893800	26894399
Chr2	18433400	18433799		Chr1	26899800	26900599
Chr2	18437400	18438999		Chr1	26911400	26911799
Chr2	18478600	18478999		Chr1	26921000	26921399
Chr2	18555200	18555799		Chr1	26929200	26929999
Chr2	18571200	18571799		Chr1	26935400	26936199
Chr2	18577400	18577999		Chr1	26938400	26939199
Chr2	18583000	18583399		Chr1	26961800	26962199
Chr2	18606000	18606599		Chr1	26965800	26966199
Chr2	18624600	18625199		Chr1	26984000	26984599
Chr2	18691400	18691999		Chr1	27016600	27016999
Chr2	18710000	18710399		Chr1	27032400	27032799
Chr2	18733800	18734199		Chr1	27033800	27034399
Chr2	18743800	18744599		Chr1	27061800	27062999
Chr2	18751800	18752399		Chr1	27093000	27093399
Chr2	18787400	18788399		Chr1	27099400	27099799
Chr2	18797800	18798399		Chr1	27115400	27116199
Chr2	18810600	18810999		Chr1	27127400	27128599
Chr2	18837800	18838199		Chr1	27139600	27140199
Chr2	18868400	18868999		Chr1	27145000	27145399
Chr2	19009200	19009599		Chr1	27148800	27148999
Chr2	19018600	19018799		Chr1	27158400	27159399
Chr2	19026800	19027199		Chr1	27185400	27185799
Chr2	19081400	19081999		Chr1	27209600	27211199
Chr2	19133200	19133599		Chr1	27225800	27226199
Chr2	19138600	19139399		Chr1	27239400	27239999
Chr2	19145600	19146199		Chr1	27244400	27244799
Chr2	19241400	19241799		Chr1	27248800	27249799
Chr2	19251000	19251399		Chr1	27250800	27251199
Chr2	19262200	19262999		Chr1	27265400	27265799
Chr2	19328400	19328799		Chr1	27268400	27268799
Chr2	19336600	19336799		Chr1	27294200	27294599
Chr2	19402000	19402599		Chr1	27313800	27314399
Chr2	19438400	19439999		Chr1	27328600	27328999
Chr2	19447200	19447599		Chr1	27367200	27367599
Chr2	19521800	19522399		Chr1	27384400	27384799
Chr2	19557400	19557999		Chr1	27400200	27400599
Chr2	19650000	19650799		Chr1	27420400	27420999
Chr2	19665000	19665399		Chr1	27430600	27430999
Chr3	400	1399		Chr1	27463000	27463799
Chr3	74200	74999		Chr1	27543600	27544599
Chr3	169400	170199		Chr1	27576400	27576999
Chr3	197600	197999		Chr1	27585200	27585999
Chr3	220800	221399		Chr1	27603600	27603999
Chr3	239600	240199		Chr1	27640200	27640599
Chr3	283000	283399		Chr1	27677800	27678199
Chr3	335800	336199		Chr1	27684600	27684799
Chr3	402200	402599		Chr1	27689000	27690199
Chr3	461400	461999		Chr1	27713600	27713799
Chr3	490400	491599		Chr1	27721200	27721799
Chr3	501800	502199		Chr1	27734200	27734599
Chr3	514000	514599		Chr1	27773000	27773399
Chr3	577200	578199		Chr1	27779800	27780399
Chr3	822800	823399		Chr1	27788400	27789199
Chr3	873000	873599		Chr1	27792600	27793399
Chr3	936800	937799		Chr1	27794400	27795199
Chr3	956200	956799		Chr1	27805200	27805599
Chr3	986000	986599		Chr1	27851800	27852399
Chr3	1039400	1039599		Chr1	27857000	27857599
Chr3	1048200	1048799		Chr1	27872400	27872999
Chr3	1152200	1152999		Chr1	27887400	27888199
Chr3	1157200	1157599		Chr1	27896400	27897199
Chr3	1159200	1159599		Chr1	27916200	27916599
Chr3	1212600	1212999		Chr1	27920800	27921999
Chr3	1241200	1241799		Chr1	27932200	27932599
Chr3	1246600	1246999		Chr1	27936800	27937199
Chr3	1284000	1284599		Chr1	27954200	27955399
Chr3	1331800	1331999		Chr1	27966400	27966799
Chr3	1359000	1359999		Chr1	27968400	27969199
Chr3	1384000	1384399		Chr1	27994000	27994599
Chr3	1391000	1391399		Chr1	28005000	28005199
Chr3	1410400	1410799		Chr1	28021000	28021799
Chr3	1413000	1413599		Chr1	28025600	28025999
Chr3	1422800	1423399		Chr1	28031200	28032199
Chr3	1430800	1431199		Chr1	28064200	28064399
Chr3	1434200	1435399		Chr1	28086000	28087199
Chr3	1444400	1444999		Chr1	28098800	28099199
Chr3	1489600	1490599		Chr1	28121000	28121599
Chr3	1494600	1494999		Chr1	28132400	28133199
Chr3	1539400	1539799		Chr1	28134600	28135199
Chr3	1579400	1579999		Chr1	28146000	28146799
Chr3	1603200	1603599		Chr1	28155200	28155999
Chr3	1653400	1654999		Chr1	28177200	28177799
Chr3	1758000	1758399		Chr1	28183400	28183599
Chr3	1781400	1781799		Chr1	28189600	28189799
Chr3	1812400	1813399		Chr1	28206000	28207599
Chr3	1871600	1871999		Chr1	28219600	28219999
Chr3	1986000	1986599		Chr1	28222800	28224399
Chr3	2120800	2121199		Chr1	28234400	28234799
Chr3	2136800	2137799		Chr1	28242400	28242799
Chr3	2180400	2180999		Chr1	28247800	28248599
Chr3	2213200	2213799		Chr1	28264200	28264799
Chr3	2223000	2223999		Chr1	28277200	28278399
Chr3	2240000	2240799		Chr1	28279200	28279799
Chr3	2258800	2259199		Chr1	28282800	28283399
Chr3	2284600	2284999		Chr1	28291600	28291799
Chr3	2318800	2319599		Chr1	28297400	28297799
Chr3	2407000	2407399		Chr1	28314200	28314599
Chr3	2412000	2412599		Chr1	28330000	28330399
Chr3	2441800	2442399		Chr1	28331800	28332399
Chr3	2468600	2469199		Chr1	28356000	28356399
Chr3	2476200	2476399		Chr1	28367000	28367599
Chr3	2486200	2486799		Chr1	28369400	28369799
Chr3	2582400	2583199		Chr1	28372400	28373199
Chr3	2586000	2586399		Chr1	28446800	28447199
Chr3	2612000	2612799		Chr1	28449800	28450199
Chr3	2617800	2617999		Chr1	28461600	28462399
Chr3	2635200	2635799		Chr1	28463600	28463999
Chr3	2652800	2652999		Chr1	28484800	28485399
Chr3	2678800	2679599		Chr1	28485800	28486199
Chr3	2686400	2686799		Chr1	28515400	28515999
Chr3	2743200	2743599		Chr1	28523600	28523999
Chr3	2773800	2774199		Chr1	28537800	28538199
Chr3	2821600	2822199		Chr1	28550000	28550999
Chr3	2824200	2824599		Chr1	28583400	28583799
Chr3	2852200	2852799		Chr1	28595200	28595599
Chr3	2940000	2940399		Chr1	28608400	28608999
Chr3	2951600	2952199		Chr1	28636200	28636599
Chr3	2959400	2959999		Chr1	28655800	28656599
Chr3	2984200	2984799		Chr1	28659600	28659999
Chr3	2996600	2997199		Chr1	28688400	28689599
Chr3	3024800	3025199		Chr1	28695600	28696599
Chr3	3043000	3043399		Chr1	28703000	28703399
Chr3	3070600	3071399		Chr1	28726600	28727599
Chr3	3090800	3091199		Chr1	28734200	28735199
Chr3	3096400	3096999		Chr1	28746800	28747399
Chr3	3308400	3308799		Chr1	28750800	28751199
Chr3	3315200	3315799		Chr1	28767400	28767599
Chr3	3338400	3339199		Chr1	28770800	28771599
Chr3	3367800	3368199		Chr1	28797200	28798599
Chr3	3382200	3382599		Chr1	28813800	28815199
Chr3	3425000	3425399		Chr1	28816600	28821999
Chr3	3476200	3476999		Chr1	28829200	28829999
Chr3	3496200	3496799		Chr1	28834800	28836599
Chr3	3504200	3504999		Chr1	28838000	28838999
Chr3	3553200	3554399		Chr1	28848200	28848599
Chr3	3559000	3560199		Chr1	28866400	28866799
Chr3	3584200	3584799		Chr1	28873200	28874199
Chr3	3602000	3602399		Chr1	28889400	28889999
Chr3	3651200	3651599		Chr1	28895600	28896199
Chr3	3672200	3673199		Chr1	28906400	28906799
Chr3	3679400	3679799		Chr1	28909600	28909999
Chr3	3698800	3698999		Chr1	28923600	28924199
Chr3	3714600	3714799		Chr1	28940800	28941999
Chr3	3724400	3725199		Chr1	28947800	28948199
Chr3	3803600	3803999		Chr1	28968400	28968999
Chr3	3839600	3840199		Chr1	28990400	28990799
Chr3	3840800	3841199		Chr1	28995400	28995999
Chr3	4227800	4228199		Chr1	29017800	29018199
Chr3	4256200	4256599		Chr1	29044200	29044799
Chr3	4285600	4286599		Chr1	29052600	29052999
Chr3	4288200	4288799		Chr1	29063000	29063599
Chr3	4332000	4332599		Chr1	29069600	29069999
Chr3	4339200	4340399		Chr1	29072800	29073599
Chr3	4462800	4463799		Chr1	29085600	29086399
Chr3	4464600	4464999		Chr1	29135800	29136199
Chr3	4525600	4526199		Chr1	29151600	29152399
Chr3	4546400	4546799		Chr1	29192000	29192599
Chr3	4559600	4560199		Chr1	29202600	29203599
Chr3	4660400	4660799		Chr1	29214200	29214599
Chr3	4743600	4744799		Chr1	29220200	29221599
Chr3	4830200	4830799		Chr1	29239200	29239599
Chr3	4833400	4834199		Chr1	29253600	29253999
Chr3	4928000	4928199		Chr1	29254400	29254599
Chr3	4952200	4952999		Chr1	29273200	29273999
Chr3	5013600	5014999		Chr1	29277200	29277799
Chr3	5082400	5083199		Chr1	29278200	29278799
Chr3	5094200	5095199		Chr1	29301400	29305199
Chr3	5136400	5136799		Chr1	29346800	29347799
Chr3	5184000	5184599		Chr1	29373800	29374399
Chr3	5278400	5279199		Chr1	29388400	29388799
Chr3	5279800	5281399		Chr1	29392200	29393199
Chr3	5284800	5286799		Chr1	29394000	29394399
Chr3	5287800	5288599		Chr1	29406000	29406999
Chr3	5481400	5481999		Chr1	29410000	29410399
Chr3	5523200	5524399		Chr1	29413400	29413599
Chr3	5620400	5620999		Chr1	29446800	29447399
Chr3	5661000	5661799		Chr1	29449000	29449199
Chr3	5690600	5690999		Chr1	29509800	29510799
Chr3	5697600	5698199		Chr1	29542000	29542399
Chr3	5814600	5816599		Chr1	29557000	29558199
Chr3	5853200	5853799		Chr1	29569800	29570199
Chr3	5859000	5859799		Chr1	29571200	29571599
Chr3	6032200	6032999		Chr1	29589800	29590599
Chr3	6083600	6084199		Chr1	29599800	29600999
Chr3	6086000	6086999		Chr1	29606800	29607199
Chr3	6097200	6098199		Chr1	29609200	29609599
Chr3	6159800	6160399		Chr1	29617800	29618399
Chr3	6163000	6163599		Chr1	29634600	29635199
Chr3	6262600	6262999		Chr1	29652600	29652999
Chr3	6301400	6301799		Chr1	29660000	29660999
Chr3	6314000	6314399		Chr1	29673200	29673999
Chr3	6350400	6350799		Chr1	29714800	29715199
Chr3	6383800	6383999		Chr1	29727600	29728199
Chr3	6387400	6387799		Chr1	29732800	29733799
Chr3	6478200	6478799		Chr1	29743400	29743799
Chr3	6483200	6483599		Chr1	29745800	29746599
Chr3	6496600	6497199		Chr1	29759200	29759799
Chr3	6497600	6497999		Chr1	29780800	29781399
Chr3	6551000	6551599		Chr1	29801000	29802399
Chr3	6559200	6560799		Chr1	29807800	29809799
Chr3	6594000	6594599		Chr1	29847800	29848599
Chr3	6597200	6597599		Chr1	29855200	29855999
Chr3	6610600	6611199		Chr1	29872400	29872799
Chr3	6664800	6665399		Chr1	29895600	29896199
Chr3	6737600	6737999		Chr1	29898200	29898999
Chr3	6802600	6803399		Chr1	29925600	29925999
Chr3	6840200	6840399		Chr1	29940800	29941599
Chr3	6921800	6922399		Chr1	29995600	29995999
Chr3	6966200	6966999		Chr1	30000800	30001199
Chr3	6995200	6995599		Chr1	30012400	30013199
Chr3	7120800	7121799		Chr1	30015800	30015999
Chr3	7140400	7140999		Chr1	30020200	30020599
Chr3	7168200	7168999		Chr1	30057200	30057999
Chr3	7177200	7177599		Chr1	30067000	30067799
Chr3	7180600	7180999		Chr1	30073600	30073999
Chr3	7192200	7193199		Chr1	30081000	30081399
Chr3	7200000	7200599		Chr1	30094800	30095399
Chr3	7262200	7263399		Chr1	30157000	30157799
Chr3	7304200	7304799		Chr1	30176600	30177199
Chr3	7315400	7316399		Chr1	30189000	30189599
Chr3	7318000	7318399		Chr1	30192600	30193199
Chr3	7320000	7320799		Chr1	30217200	30217999
Chr3	7342600	7343199		Chr1	30285400	30286799
Chr3	7348800	7349399		Chr1	30298600	30298999
Chr3	7387200	7387599		Chr1	30324200	30324599
Chr3	7400000	7400399		Chr1	30351800	30352599
Chr3	7412000	7412599		Chr1	30363600	30364199
Chr3	7451800	7452399		Chr1	30368400	30368999
Chr3	7462600	7462999		Chr1	30392800	30393799
Chr3	7563600	7564399		Chr1	30397000	30397199
Chr3	7580400	7580799		Chr1	30408400	30409599
Chr3	7590000	7590399		Chr1	30414200	30414799
Chr3	7617400	7617799		Chr1	30416200	30416999
Chr3	7638600	7638999		Chr2	121800	121999
Chr3	7669400	7669799		Chr2	150000	150399
Chr3	7676800	7677199		Chr2	175200	175599
Chr3	7684800	7685799		Chr2	183200	183599
Chr3	7763600	7764199		Chr2	184000	184599
Chr3	7775600	7776199		Chr2	257200	257399
Chr3	7784200	7784799		Chr2	263400	263999
Chr3	7793600	7793999		Chr2	269000	270199
Chr3	7795400	7796199		Chr2	280200	280799
Chr3	7800200	7800799		Chr2	316400	316799
Chr3	7806400	7808199		Chr2	328200	328799
Chr3	7813000	7813999		Chr2	332600	333199
Chr3	7864600	7864999		Chr2	347000	347799
Chr3	7869600	7870199		Chr2	410600	411199
Chr3	7889400	7889999		Chr2	422400	422799
Chr3	7893200	7893999		Chr2	434400	434599
Chr3	7912800	7913599		Chr2	440800	441199
Chr3	7923600	7923999		Chr2	443400	444399
Chr3	7961600	7961999		Chr2	448000	448399
Chr3	7967000	7967799		Chr2	454200	454599
Chr3	7968200	7968999		Chr2	509600	510399
Chr3	8004400	8005199		Chr2	518400	518999
Chr3	8018200	8018999		Chr2	520800	521599
Chr3	8023400	8024199		Chr2	523600	524199
Chr3	8112600	8114199		Chr2	547600	547999
Chr3	8139200	8140599		Chr2	548400	548799
Chr3	8162000	8162999		Chr2	551200	552599
Chr3	8173600	8173999		Chr2	561200	561999
Chr3	8179000	8179399		Chr2	565400	566199
Chr3	8203800	8204199		Chr2	590400	590999
Chr3	8250400	8251399		Chr2	605000	605599
Chr3	8255600	8256199		Chr2	616000	616599
Chr3	8260600	8261399		Chr2	619400	620199
Chr3	8326600	8326999		Chr2	647800	648599
Chr3	8332600	8333999		Chr2	650000	650599
Chr3	8339400	8339999		Chr2	652800	653799
Chr3	8347600	8348199		Chr2	661200	661599
Chr3	8377400	8378399		Chr2	667200	667999
Chr3	8410200	8411799		Chr2	673200	673599
Chr3	8423400	8424799		Chr2	684400	684999
Chr3	8530800	8531399		Chr2	723400	724999
Chr3	8557600	8558399		Chr2	738800	739399
Chr3	8559400	8560199		Chr2	747600	747999
Chr3	8565400	8565799		Chr2	749800	750199
Chr3	8607400	8607999		Chr2	770000	770799
Chr3	8612000	8612799		Chr2	773000	773399
Chr3	8641200	8642799		Chr2	788200	788999
Chr3	8647000	8647599		Chr2	806600	806999
Chr3	8654600	8654999		Chr2	821000	822199
Chr3	8693200	8693999		Chr2	841400	842199
Chr3	8695400	8696799		Chr2	881000	881599
Chr3	8733200	8734399		Chr2	901200	901999
Chr3	8780600	8780999		Chr2	916800	917199
Chr3	8787000	8787399		Chr2	935200	935999
Chr3	8834800	8835399		Chr2	937400	938399
Chr3	8838000	8838799		Chr2	953800	954199
Chr3	8861200	8861799		Chr2	956000	957399
Chr3	8903800	8904199		Chr2	961800	961999
Chr3	8911200	8912199		Chr2	967800	967999
Chr3	8945200	8945599		Chr2	991600	992199
Chr3	8947800	8948199		Chr2	1028800	1029399
Chr3	8952000	8952399		Chr2	1039400	1040199
Chr3	8960400	8960799		Chr2	1043400	1044599
Chr3	8971200	8971599		Chr2	1076800	1077999
Chr3	8975600	8975999		Chr2	1085400	1085799
Chr3	9004000	9004799		Chr2	1150600	1151799
Chr3	9031400	9032199		Chr2	1162600	1163199
Chr3	9039400	9041199		Chr2	1181800	1182199
Chr3	9064800	9065399		Chr2	1188200	1188599
Chr3	9123000	9123599		Chr2	1253600	1253999
Chr3	9129000	9129399		Chr2	1281800	1282399
Chr3	9144600	9144999		Chr2	1287800	1288199
Chr3	9147400	9147999		Chr2	1302000	1302399
Chr3	9181000	9181599		Chr2	1331600	1332199
Chr3	9188600	9189399		Chr2	1407000	1407599
Chr3	9236400	9236599		Chr2	1412800	1413599
Chr3	9246400	9246599		Chr2	1435200	1436399
Chr3	9250200	9250599		Chr2	1481000	1481599
Chr3	9254400	9254999		Chr2	1502600	1503199
Chr3	9272800	9273199		Chr2	1534600	1535199
Chr3	9341000	9341599		Chr2	1549400	1549599
Chr3	9358400	9359199		Chr2	1573600	1574199
Chr3	9366200	9366599		Chr2	1574600	1575799
Chr3	9371000	9371599		Chr2	1588800	1589199
Chr3	9455400	9456999		Chr2	1605200	1606199
Chr3	9490200	9490599		Chr2	1611000	1612999
Chr3	9496200	9497199		Chr2	1623400	1624199
Chr3	9501800	9501999		Chr2	1645400	1645799
Chr3	9503000	9504199		Chr2	1649800	1650199
Chr3	9654200	9654799		Chr2	1668200	1668599
Chr3	9657400	9657799		Chr2	1687600	1687999
Chr3	9710800	9711399		Chr2	1701200	1701599
Chr3	9745800	9746199		Chr2	1705400	1705599
Chr3	9752600	9753399		Chr2	1715800	1716399
Chr3	9756000	9756599		Chr2	1761000	1761599
Chr3	9804600	9804999		Chr2	1762600	1762799
Chr3	9817200	9817599		Chr2	1765200	1765799
Chr3	9851000	9851799		Chr2	1782200	1782599
Chr3	9948600	9948799		Chr2	1800400	1800599
Chr3	9979000	9979599		Chr2	1802400	1803399
Chr3	9995000	9995599		Chr2	1824000	1824599
Chr3	9998400	9998799		Chr2	1831800	1832599
Chr3	10017400	10018599		Chr2	1873600	1874199
Chr3	10029000	10029599		Chr2	1875400	1875599
Chr3	10033200	10033799		Chr2	1931800	1932399
Chr3	10034800	10035199		Chr2	1935800	1936399
Chr3	10054800	10055199		Chr2	1943800	1944399
Chr3	10074400	10074799		Chr2	2067600	2067999
Chr3	10080600	10080999		Chr2	2070000	2070399
Chr3	10131400	10132199		Chr2	2114200	2115199
Chr3	10163200	10163999		Chr2	2122400	2123199
Chr3	10172800	10173599		Chr2	2123800	2124399
Chr3	10176400	10176799		Chr2	2134000	2134599
Chr3	10215400	10215799		Chr2	2135800	2136399
Chr3	10263600	10263999		Chr2	2141400	2142199
Chr3	10286800	10287399		Chr2	2146800	2147399
Chr3	10300600	10301599		Chr2	2180800	2181199
Chr3	10326400	10327199		Chr2	2190600	2191399
Chr3	10400600	10401799		Chr2	2207200	2208399
Chr3	10424800	10425999		Chr2	2216200	2216999
Chr3	10462400	10462799		Chr2	2262600	2262999
Chr3	10470000	10471199		Chr2	2270600	2271399
Chr3	10484400	10484799		Chr2	2271800	2272599
Chr3	10518000	10518399		Chr2	2294800	2295199
Chr3	10520200	10520599		Chr2	2326000	2326799
Chr3	10537600	10538199		Chr2	2328400	2329399
Chr3	10560400	10560799		Chr2	2333000	2333599
Chr3	10677600	10677999		Chr2	2347800	2348199
Chr3	10682400	10683199		Chr2	2350200	2351399
Chr3	10686600	10687199		Chr2	2354600	2355599
Chr3	10695200	10695999		Chr2	2375800	2376399
Chr3	10700800	10703799		Chr2	2384000	2384799
Chr3	10716600	10717399		Chr2	2400000	2400399
Chr3	10740000	10740399		Chr2	2409000	2409799
Chr3	10755200	10755799		Chr2	2415000	2415599
Chr3	10759200	10760199		Chr2	2426200	2426599
Chr3	10781400	10783599		Chr2	2429400	2429799
Chr3	10785400	10786199		Chr2	2446200	2447199
Chr3	10797600	10800599		Chr2	2452800	2453199
Chr3	10801600	10802199		Chr2	2468200	2468799
Chr3	10811400	10811799		Chr2	2473200	2473799
Chr3	10834600	10834999		Chr2	2485400	2485799
Chr3	10849600	10850599		Chr2	2487400	2487599
Chr3	10856400	10856799		Chr2	2496600	2497399
Chr3	10874400	10874799		Chr2	2500400	2500999
Chr3	10877200	10877799		Chr2	2508600	2509399
[truncated: 5,580 more rows]
