# Supplementary material for: The Global Changes of N6-methyldeoxyadenosine in Response to Low Temperature in Arabidopsis thaliana and Rice
Source: Plants (Basel). 2023 Jun 19;12(12):2373. doi: 10.3390/plants12122373 (PMC10305114; doi:10.3390/plants12122373)
Supplement: Supplementary file 1 [file plants-12-02373-s001.zip › Table S3.xlsx]

## Sheet: Sheet1
		Table S3. Identification of 6mA peaks under normal and cold conditions in rice.
Normal				Cold
Chr	start	end		Chr	start	end
Chr1	26000	26599		Chr1	1200	2199
Chr1	70400	71199		Chr1	26000	26599
Chr1	77000	78599		Chr1	41400	42199
Chr1	88200	88999		Chr1	42600	43199
Chr1	143600	144399		Chr1	52400	53399
Chr1	153400	154599		Chr1	58800	59599
Chr1	169000	170599		Chr1	96200	98399
Chr1	184600	185399		Chr1	141600	142799
Chr1	189200	189999		Chr1	143600	144199
Chr1	199800	200799		Chr1	153400	154199
Chr1	202200	203399		Chr1	169800	171399
Chr1	208800	210399		Chr1	191000	191599
Chr1	232000	234399		Chr1	202200	202599
Chr1	302000	302599		Chr1	209200	209799
Chr1	316000	317799		Chr1	232400	232799
Chr1	392200	393799		Chr1	236800	237599
Chr1	463200	464199		Chr1	258400	259799
Chr1	470800	470999		Chr1	270400	271199
Chr1	478800	479999		Chr1	288200	290199
Chr1	481600	482599		Chr1	292600	294199
Chr1	486200	487199		Chr1	319600	320599
Chr1	498400	499799		Chr1	331000	332399
Chr1	515000	516399		Chr1	389400	390199
Chr1	519200	521199		Chr1	392000	392799
Chr1	641000	641799		Chr1	405200	405599
Chr1	642800	643799		Chr1	419800	420399
Chr1	658000	658799		Chr1	422600	422799
Chr1	660200	660799		Chr1	460200	461399
Chr1	673200	673599		Chr1	470800	471199
Chr1	800000	800599		Chr1	481600	482799
Chr1	842600	844199		Chr1	498400	499399
Chr1	851000	851599		Chr1	515800	516399
Chr1	864200	866599		Chr1	527200	528199
Chr1	938800	939599		Chr1	533200	534199
Chr1	961800	962999		Chr1	595400	596399
Chr1	966000	966799		Chr1	604800	605599
Chr1	1027200	1028399		Chr1	632000	632399
Chr1	1046000	1046999		Chr1	641000	641399
Chr1	1056400	1057999		Chr1	658400	658999
Chr1	1087000	1088599		Chr1	673000	673599
Chr1	1094400	1095199		Chr1	723000	723399
Chr1	1110000	1111199		Chr1	736600	737799
Chr1	1118800	1119799		Chr1	738400	739799
Chr1	1136800	1137399		Chr1	744400	744999
Chr1	1138400	1139799		Chr1	749000	750199
Chr1	1153200	1153599		Chr1	770200	770999
Chr1	1214400	1215399		Chr1	798400	799199
Chr1	1407800	1408999		Chr1	801600	802199
Chr1	1423400	1424399		Chr1	802600	803599
Chr1	1550400	1550999		Chr1	841800	844199
Chr1	1624200	1624999		Chr1	860000	860999
Chr1	1780000	1781199		Chr1	937800	943999
Chr1	1792600	1792999		Chr1	965000	965999
Chr1	1836600	1837399		Chr1	1001800	1003199
Chr1	1929600	1930599		Chr1	1007000	1007799
Chr1	2045400	2045799		Chr1	1019200	1020599
Chr1	2098600	2100999		Chr1	1029200	1029799
Chr1	2250800	2251799		Chr1	1046000	1046799
Chr1	2262800	2263399		Chr1	1059400	1059999
Chr1	2380600	2381399		Chr1	1069400	1069799
Chr1	2395200	2396399		Chr1	1112000	1113399
Chr1	2415800	2417599		Chr1	1118800	1119799
Chr1	2546200	2547199		Chr1	1178200	1179599
Chr1	2561400	2562199		Chr1	1209800	1209999
Chr1	2603400	2604399		Chr1	1239600	1239999
Chr1	2612000	2612999		Chr1	1245600	1246399
Chr1	2634600	2635799		Chr1	1278000	1278599
Chr1	2645800	2646599		Chr1	1289400	1290199
Chr1	2669200	2670199		Chr1	1310000	1311199
Chr1	2857000	2857599		Chr1	1324000	1324599
Chr1	3103400	3104999		Chr1	1328200	1329399
Chr1	3223200	3223999		Chr1	1371600	1372999
Chr1	3334400	3335799		Chr1	1373400	1374199
Chr1	3366200	3367399		Chr1	1375400	1376399
Chr1	3428200	3429199		Chr1	1389000	1390599
Chr1	3449200	3450599		Chr1	1404600	1404999
Chr1	3713000	3713999		Chr1	1405800	1406999
Chr1	3791600	3792799		Chr1	1411600	1411999
Chr1	3806800	3807799		Chr1	1421600	1422199
Chr1	3829200	3830199		Chr1	1423600	1424399
Chr1	4087200	4088599		Chr1	1486200	1486799
Chr1	4124200	4126399		Chr1	1539800	1541199
Chr1	4178400	4180199		Chr1	1542200	1542799
Chr1	4275000	4275799		Chr1	1548800	1551199
Chr1	4434400	4435999		Chr1	1559200	1559999
Chr1	4542800	4544399		Chr1	1563000	1564399
Chr1	4675200	4676999		Chr1	1623000	1623799
Chr1	4731000	4731999		Chr1	1624200	1624599
Chr1	4812600	4814199		Chr1	1631600	1632199
Chr1	4884800	4885399		Chr1	1694800	1696399
Chr1	4891800	4892399		Chr1	1725400	1725799
Chr1	5018600	5019399		Chr1	1729000	1729599
Chr1	5038600	5039399		Chr1	1730800	1732399
Chr1	5048400	5049199		Chr1	1735200	1735999
Chr1	5070800	5071599		Chr1	1746000	1746599
Chr1	5078600	5079199		Chr1	1760400	1760999
Chr1	5080000	5081399		Chr1	1792600	1792999
Chr1	5112400	5113599		Chr1	1817000	1818999
Chr1	5226800	5227399		Chr1	1832600	1833399
Chr1	5236200	5236799		Chr1	1873600	1874399
Chr1	5247000	5248399		Chr1	2009600	2010399
Chr1	5295000	5295999		Chr1	2014600	2015799
Chr1	5334400	5334999		Chr1	2024400	2024999
Chr1	5368400	5368999		Chr1	2089000	2090599
Chr1	5381400	5382799		Chr1	2091000	2092199
Chr1	5392000	5393999		Chr1	2094000	2094399
Chr1	5415000	5415999		Chr1	2106800	2107599
Chr1	5434200	5435199		Chr1	2137600	2138199
Chr1	5507000	5507999		Chr1	2139600	2139999
Chr1	5513200	5514199		Chr1	2143600	2144599
Chr1	5516600	5517599		Chr1	2161600	2161999
Chr1	5563800	5564599		Chr1	2224200	2224999
Chr1	5578000	5578999		Chr1	2225600	2226199
Chr1	5580000	5580599		Chr1	2233000	2233999
Chr1	5600800	5601399		Chr1	2250800	2251599
Chr1	5705800	5706599		Chr1	2258000	2258599
Chr1	5727000	5728999		Chr1	2271200	2271999
Chr1	5747600	5748199		Chr1	2275000	2275599
Chr1	5766200	5767599		Chr1	2289600	2290599
Chr1	5887000	5887999		Chr1	2328600	2329599
Chr1	5948400	5948999		Chr1	2361600	2363599
Chr1	5953600	5954199		Chr1	2383400	2384599
Chr1	5992400	5993599		Chr1	2415600	2416799
Chr1	6010800	6011599		Chr1	2419400	2420599
Chr1	6097800	6098799		Chr1	2446000	2446599
Chr1	6151800	6152799		Chr1	2452000	2453199
Chr1	6196000	6196799		Chr1	2463800	2464199
Chr1	6224200	6224999		Chr1	2465400	2465999
Chr1	6274400	6274999		Chr1	2479600	2480199
Chr1	6311400	6312999		Chr1	2487400	2489199
Chr1	6314000	6314599		Chr1	2523000	2523799
Chr1	6338600	6339399		Chr1	2531000	2531999
Chr1	6556600	6557199		Chr1	2542200	2542599
Chr1	6564400	6564999		Chr1	2546600	2547399
Chr1	6574800	6575599		Chr1	2560800	2561799
Chr1	6650000	6650799		Chr1	2645800	2646999
Chr1	6680400	6680999		Chr1	2650000	2653399
Chr1	6699800	6700399		Chr1	2660600	2661399
Chr1	6707400	6708399		Chr1	2686400	2686799
Chr1	6731600	6732199		Chr1	2694600	2695399
Chr1	6797400	6798599		Chr1	2704000	2704599
Chr1	6877200	6877999		Chr1	2722400	2722999
Chr1	6912800	6913599		Chr1	2725800	2726399
Chr1	6948400	6949399		Chr1	2826200	2826799
Chr1	6961600	6962599		Chr1	2828400	2828799
Chr1	6963200	6963999		Chr1	2851400	2852799
Chr1	6978200	6979199		Chr1	2866000	2867399
Chr1	7153200	7154599		Chr1	2873600	2874199
Chr1	7156200	7156799		Chr1	2892800	2894399
Chr1	7158600	7159399		Chr1	2934800	2936599
Chr1	7222200	7223599		Chr1	2964000	2965199
Chr1	7253600	7254799		Chr1	2972400	2973599
Chr1	7294000	7294399		Chr1	3005200	3006199
Chr1	7334200	7334599		Chr1	3054200	3054999
Chr1	7367000	7367799		Chr1	3079600	3080999
Chr1	7368800	7370399		Chr1	3094000	3095999
Chr1	7376800	7378199		Chr1	3104600	3105599
Chr1	7409000	7409399		Chr1	3130000	3130399
Chr1	7416000	7416399		Chr1	3145800	3146799
Chr1	7443800	7445399		Chr1	3148000	3148999
Chr1	7475600	7476799		Chr1	3168200	3169999
Chr1	7484600	7485599		Chr1	3176400	3177399
Chr1	7488800	7489599		Chr1	3185800	3186399
Chr1	7497000	7497999		Chr1	3191200	3191799
Chr1	7507000	7507999		Chr1	3228800	3230199
Chr1	7539200	7540599		Chr1	3243600	3244399
Chr1	7563400	7564399		Chr1	3258000	3258599
Chr1	7572000	7573199		Chr1	3279200	3279799
Chr1	7655400	7655999		Chr1	3288200	3288999
Chr1	7777200	7777599		Chr1	3291000	3291599
Chr1	7822600	7823199		Chr1	3294800	3295199
Chr1	7835800	7836199		Chr1	3299200	3299799
Chr1	7837200	7837799		Chr1	3303400	3304199
Chr1	8118600	8120199		Chr1	3308200	3309399
Chr1	8311400	8311799		Chr1	3314800	3315599
Chr1	8371000	8371999		Chr1	3316600	3316999
Chr1	8389400	8390599		Chr1	3317400	3318799
Chr1	8420600	8421999		Chr1	3322600	3322999
Chr1	8458800	8459999		Chr1	3324000	3324599
Chr1	8612600	8612999		Chr1	3366600	3368399
Chr1	8665200	8667199		Chr1	3383400	3383999
Chr1	8686600	8687199		Chr1	3407800	3408399
Chr1	8726400	8726999		Chr1	3441200	3442399
Chr1	8752400	8753799		Chr1	3449200	3450399
Chr1	8791800	8792399		Chr1	3484200	3484799
Chr1	8948200	8949199		Chr1	3493000	3493999
Chr1	8950000	8952599		Chr1	3505600	3506399
Chr1	8962200	8963199		Chr1	3528600	3528999
Chr1	8966800	8967999		Chr1	3555800	3556399
Chr1	8982600	8983799		Chr1	3596000	3597599
Chr1	8991600	8993199		Chr1	3642600	3643999
Chr1	9187000	9187599		Chr1	3672600	3673199
Chr1	9197600	9198399		Chr1	3698600	3699999
Chr1	9210200	9211399		Chr1	3711600	3712199
Chr1	9244800	9245599		Chr1	3733600	3733999
Chr1	9259800	9261999		Chr1	3807400	3807999
Chr1	9263200	9263999		Chr1	3812000	3812599
Chr1	9407200	9407799		Chr1	3849200	3849999
Chr1	9441000	9441599		Chr1	3857000	3857599
Chr1	9448000	9449199		Chr1	3901000	3901999
Chr1	9631200	9633199		Chr1	3922200	3922999
Chr1	9636600	9638799		Chr1	3928200	3929599
Chr1	9641400	9641999		Chr1	3983600	3984599
Chr1	9705000	9705799		Chr1	3995000	3996399
Chr1	9963000	9963799		Chr1	4029200	4030399
Chr1	9965400	9966399		Chr1	4052200	4052999
Chr1	10016200	10017799		Chr1	4099200	4099599
Chr1	10100800	10102199		Chr1	4141000	4141599
Chr1	10134400	10135799		Chr1	4142800	4144399
Chr1	10229600	10230199		Chr1	4179400	4181599
Chr1	10233600	10234799		Chr1	4232000	4234199
Chr1	10282400	10283799		Chr1	4254400	4255399
Chr1	10353600	10354799		Chr1	4259000	4259799
Chr1	10426600	10427399		Chr1	4263600	4264199
Chr1	10474200	10474799		Chr1	4275200	4276399
Chr1	10501000	10504399		Chr1	4338000	4338799
Chr1	10555600	10555999		Chr1	4355200	4356599
Chr1	10600000	10601399		Chr1	4374000	4374599
Chr1	10634600	10636199		Chr1	4489600	4490399
Chr1	10673800	10674799		Chr1	4587200	4587799
Chr1	10676000	10676799		Chr1	4621000	4621999
Chr1	10713800	10714399		Chr1	4697400	4698199
Chr1	10943400	10944399		Chr1	4736800	4737599
Chr1	10962400	10962999		Chr1	4758200	4759599
Chr1	10972400	10973199		Chr1	4884000	4885799
Chr1	10978800	10979399		Chr1	4904200	4904999
Chr1	10981400	10982599		Chr1	4913200	4913799
Chr1	10989800	10990199		Chr1	4924800	4925799
Chr1	11038000	11038999		Chr1	4956400	4956999
Chr1	11066600	11067399		Chr1	4958200	4959199
Chr1	11091600	11092199		Chr1	4964200	4964799
Chr1	11166600	11167199		Chr1	4971800	4973399
Chr1	11197800	11198999		Chr1	4975600	4976799
Chr1	11344200	11345199		Chr1	5014200	5014799
Chr1	11411200	11411999		Chr1	5037800	5039199
Chr1	11579200	11580599		Chr1	5044800	5045799
Chr1	11604600	11605199		Chr1	5060800	5060999
Chr1	11621600	11622599		Chr1	5071000	5071999
Chr1	11664000	11664599		Chr1	5080200	5080999
Chr1	11674200	11674599		Chr1	5104000	5104399
Chr1	11699000	11699799		Chr1	5140000	5140599
Chr1	11790600	11792599		Chr1	5158600	5159199
Chr1	11907600	11908799		Chr1	5188400	5189199
Chr1	11929800	11930399		Chr1	5201800	5202799
Chr1	12055000	12056199		Chr1	5217600	5220399
Chr1	12127400	12128399		Chr1	5226600	5226999
Chr1	12154400	12154799		Chr1	5300400	5300999
Chr1	12266000	12266599		Chr1	5319200	5320199
Chr1	12267000	12268199		Chr1	5386600	5388199
Chr1	12284800	12285599		Chr1	5393000	5394399
Chr1	12316800	12318199		Chr1	5483400	5484199
Chr1	12329800	12330799		Chr1	5546800	5547399
Chr1	12336200	12337199		Chr1	5567600	5568999
Chr1	12391600	12392799		Chr1	5584800	5585399
Chr1	12551600	12552199		Chr1	5589800	5590799
Chr1	12570000	12570799		Chr1	5598800	5599399
Chr1	12595400	12596799		Chr1	5599800	5601199
Chr1	12619400	12620399		Chr1	5665400	5665799
Chr1	12659000	12659799		Chr1	5689600	5690399
Chr1	12687600	12688599		Chr1	5693200	5693999
Chr1	12695600	12696999		Chr1	5717000	5717199
Chr1	12713400	12714599		Chr1	5718200	5719799
Chr1	12779000	12779999		Chr1	5723800	5724399
Chr1	12831200	12832199		Chr1	5727200	5728999
Chr1	13089600	13090199		Chr1	5764800	5765599
Chr1	13113200	13113799		Chr1	5767000	5767999
Chr1	13193400	13196399		Chr1	5770000	5770999
Chr1	13202200	13202999		Chr1	5827400	5827799
Chr1	13203800	13204199		Chr1	5890400	5891399
Chr1	13221000	13223999		Chr1	5922000	5922399
Chr1	13305800	13306399		Chr1	5923400	5924199
Chr1	13336200	13336999		Chr1	5958400	5959199
Chr1	13450600	13451399		Chr1	5961600	5962199
Chr1	13478200	13478999		Chr1	6015400	6015999
Chr1	13486200	13487399		Chr1	6024800	6025599
Chr1	13499000	13499599		Chr1	6030600	6032799
Chr1	13565200	13566999		Chr1	6111000	6111399
Chr1	13569600	13571599		Chr1	6152200	6152999
Chr1	13574400	13575799		Chr1	6175000	6175399
Chr1	13616800	13617599		Chr1	6240200	6240799
Chr1	13620200	13620799		Chr1	6259800	6260199
Chr1	13671200	13671999		Chr1	6268200	6268799
Chr1	13717200	13717799		Chr1	6274400	6276199
Chr1	13736600	13737199		Chr1	6319000	6319799
Chr1	13757600	13758399		Chr1	6320200	6321399
Chr1	13777000	13778799		Chr1	6340800	6341399
Chr1	13786200	13788199		Chr1	6393600	6394199
Chr1	13853800	13854999		Chr1	6409800	6411399
Chr1	14065200	14067399		Chr1	6424000	6424799
Chr1	14092800	14093599		Chr1	6477000	6477199
Chr1	14129200	14129799		Chr1	6537400	6538599
Chr1	14150200	14151599		Chr1	6539200	6539599
Chr1	14155800	14156599		Chr1	6581200	6581999
Chr1	14190200	14190599		Chr1	6583600	6584399
Chr1	14278800	14279999		Chr1	6622200	6622999
Chr1	14406800	14407599		Chr1	6644200	6645199
Chr1	14415200	14419799		Chr1	6680400	6681199
Chr1	14420400	14427399		Chr1	6709200	6709599
Chr1	14432800	14433799		Chr1	6723600	6724399
Chr1	14457400	14459199		Chr1	6914000	6914799
Chr1	14472000	14472999		Chr1	6918200	6918599
Chr1	14627200	14628599		Chr1	6958400	6958799
Chr1	14747800	14749399		Chr1	7019600	7020399
Chr1	14751600	14752799		Chr1	7051200	7052399
Chr1	14755400	14756999		Chr1	7064600	7065199
Chr1	14792200	14792799		Chr1	7128400	7128799
Chr1	14801400	14802599		Chr1	7155200	7155799
Chr1	14817400	14818199		Chr1	7158800	7159399
Chr1	14829600	14831199		Chr1	7202600	7203399
Chr1	14884800	14885399		Chr1	7228600	7229999
Chr1	14929000	14929599		Chr1	7239800	7240999
Chr1	15010600	15011799		Chr1	7249800	7250399
Chr1	15094000	15094799		Chr1	7308000	7310799
Chr1	15166600	15168399		Chr1	7334000	7334599
Chr1	15208400	15209199		Chr1	7351400	7351999
Chr1	15318000	15318599		Chr1	7367200	7367999
Chr1	15398400	15399199		Chr1	7375200	7378799
Chr1	15442400	15442599		Chr1	7393200	7393599
Chr1	15505600	15507199		Chr1	7399400	7400799
Chr1	15530800	15531399		Chr1	7444800	7445399
Chr1	15547400	15548399		Chr1	7466000	7466999
Chr1	15587000	15589799		Chr1	7468600	7469399
Chr1	15594400	15594999		Chr1	7475600	7476799
Chr1	15622800	15624199		Chr1	7485000	7485599
Chr1	15648800	15650399		Chr1	7507200	7507999
Chr1	15662200	15662999		Chr1	7522400	7522999
Chr1	15804400	15805999		Chr1	7539000	7539399
Chr1	15814400	15814999		Chr1	7571000	7571799
Chr1	15818600	15819999		Chr1	7572800	7573399
Chr1	16006600	16007199		Chr1	7599000	7599799
Chr1	16015600	16018799		Chr1	7629000	7630199
Chr1	16021200	16022399		Chr1	7691600	7693799
Chr1	16025200	16026199		Chr1	7752800	7754199
Chr1	16028000	16029399		Chr1	7765000	7766199
Chr1	16043200	16043999		Chr1	7796000	7796599
Chr1	16070200	16070999		Chr1	7806200	7806799
Chr1	16109400	16110399		Chr1	7816200	7817199
Chr1	16204200	16205199		Chr1	7822600	7823599
Chr1	16210800	16211799		Chr1	7870800	7871399
Chr1	16234200	16234599		Chr1	7885600	7886199
Chr1	16272000	16272799		Chr1	7904600	7904999
Chr1	16291800	16293599		Chr1	7936400	7937599
Chr1	16332400	16333599		Chr1	7984000	7984199
Chr1	16532600	16533199		Chr1	7988600	7989999
Chr1	16547000	16548799		Chr1	8034400	8034599
Chr1	16564600	16565599		Chr1	8040800	8042199
Chr1	16849200	16849599		Chr1	8100800	8101399
Chr1	16961600	16966399		Chr1	8119600	8120199
Chr1	17009000	17009999		Chr1	8122000	8122599
Chr1	17019800	17020399		Chr1	8144600	8145799
Chr1	17026200	17028199		Chr1	8158200	8158599
Chr1	17030800	17031399		Chr1	8170200	8170799
Chr1	17175800	17176599		Chr1	8267800	8268799
Chr1	17181600	17182599		Chr1	8311400	8311999
Chr1	17266000	17267399		Chr1	8327600	8328399
Chr1	17302800	17303599		Chr1	8389400	8390199
Chr1	17353600	17355199		Chr1	8399200	8399799
Chr1	17355800	17356999		Chr1	8458800	8459799
Chr1	17424800	17425399		Chr1	8463600	8464999
Chr1	17429800	17430999		Chr1	8470800	8471999
Chr1	17459600	17460399		Chr1	8499600	8500799
Chr1	17522200	17522799		Chr1	8509000	8511799
Chr1	17593200	17593799		Chr1	8529000	8529999
Chr1	17601600	17602599		Chr1	8577400	8577999
Chr1	17629800	17630399		Chr1	8584800	8585599
Chr1	17849600	17850199		Chr1	8586200	8587399
Chr1	17852600	17853399		Chr1	8612400	8612999
Chr1	17905400	17905999		Chr1	8639000	8639799
Chr1	18024800	18026199		Chr1	8686600	8687199
Chr1	18045800	18046399		Chr1	8714600	8715999
Chr1	18224600	18225399		Chr1	8726600	8726999
Chr1	18268400	18269199		Chr1	8796800	8797599
Chr1	18284800	18285999		Chr1	8814800	8815199
Chr1	18402200	18403199		Chr1	8910000	8910599
Chr1	18436200	18436999		Chr1	8992200	8993199
Chr1	18496200	18496799		Chr1	9044200	9044799
Chr1	18566400	18567799		Chr1	9054400	9055799
Chr1	18573800	18575399		Chr1	9072800	9073399
Chr1	18577400	18578399		Chr1	9074400	9074799
Chr1	18593400	18594399		Chr1	9077600	9078199
Chr1	18659800	18661199		Chr1	9094600	9095199
Chr1	18736600	18738399		Chr1	9107600	9108799
Chr1	18743400	18744799		Chr1	9157600	9158399
Chr1	18750200	18751999		Chr1	9183200	9183999
Chr1	18799400	18799999		Chr1	9198000	9198399
Chr1	18828600	18829399		Chr1	9211400	9211799
Chr1	18861200	18861999		Chr1	9221000	9221599
Chr1	18888400	18888999		Chr1	9243200	9243799
Chr1	18896600	18897199		Chr1	9244800	9246399
Chr1	19034800	19035599		Chr1	9287000	9287599
Chr1	19046600	19046999		Chr1	9293200	9293599
Chr1	19102000	19102999		Chr1	9307600	9308399
Chr1	19103400	19104199		Chr1	9308800	9309999
Chr1	19119600	19120599		Chr1	9316000	9318599
Chr1	19180200	19180999		Chr1	9323200	9323399
Chr1	19244800	19245799		Chr1	9354400	9354999
Chr1	19254000	19254999		Chr1	9359800	9360999
Chr1	19344200	19346199		Chr1	9364000	9366599
Chr1	19348800	19349199		Chr1	9367000	9368999
Chr1	19465400	19465999		Chr1	9386000	9386999
Chr1	19595200	19595799		Chr1	9393000	9393399
Chr1	19644800	19645599		Chr1	9396400	9398399
Chr1	19818600	19821199		Chr1	9419000	9420799
Chr1	19843000	19843799		Chr1	9423600	9423999
Chr1	19845200	19846599		Chr1	9438200	9439799
Chr1	19883000	19885999		Chr1	9568600	9569999
Chr1	19981800	19982399		Chr1	9711800	9711999
Chr1	20024600	20025999		Chr1	9736600	9737399
Chr1	20136400	20137199		Chr1	9831200	9831999
Chr1	20221200	20221799		Chr1	9833400	9834199
Chr1	20237000	20237599		Chr1	9837600	9838399
Chr1	20251600	20253199		Chr1	9842200	9842799
Chr1	20357800	20358399		Chr1	9895600	9896599
Chr1	20454600	20456199		Chr1	9905800	9906199
Chr1	20634600	20635199		Chr1	9921000	9921799
Chr1	20713400	20714199		Chr1	9932800	9933599
Chr1	20728600	20729599		Chr1	9949000	9949999
Chr1	20743400	20745199		Chr1	9967600	9969199
Chr1	20758200	20758999		Chr1	10048400	10048999
Chr1	20783800	20784599		Chr1	10094600	10095399
Chr1	20785400	20786199		Chr1	10134400	10134999
Chr1	20864400	20865599		Chr1	10155000	10155599
Chr1	20915200	20915799		Chr1	10156000	10156799
Chr1	20949800	20950599		Chr1	10198200	10198799
Chr1	20961200	20963199		Chr1	10229400	10230199
Chr1	20991200	20991999		Chr1	10234000	10235799
Chr1	21008800	21010399		Chr1	10283200	10283799
Chr1	21012800	21013999		Chr1	10303400	10304599
Chr1	21021000	21022199		Chr1	10316000	10316599
Chr1	21065800	21067999		Chr1	10319000	10320199
Chr1	21083600	21084599		Chr1	10337000	10337799
Chr1	21110200	21111599		Chr1	10354000	10354799
Chr1	21137800	21138399		Chr1	10426400	10427199
Chr1	21139400	21140199		Chr1	10480200	10480599
Chr1	21141400	21142399		Chr1	10481000	10481999
Chr1	21152600	21153399		Chr1	10492200	10492999
Chr1	21174400	21175599		Chr1	10499200	10504599
Chr1	21268600	21269599		Chr1	10509400	10510399
Chr1	21372800	21374399		Chr1	10585800	10586599
Chr1	21375000	21375999		Chr1	10597400	10598599
Chr1	21397400	21398399		Chr1	10601000	10601599
Chr1	21400600	21401599		Chr1	10614600	10615399
Chr1	21407600	21408999		Chr1	10662400	10663199
Chr1	21484600	21484799		Chr1	10666800	10667399
Chr1	21530000	21530999		Chr1	10673600	10674599
Chr1	21532600	21533399		Chr1	10675000	10676599
Chr1	21534400	21534799		Chr1	10687200	10688399
Chr1	21567400	21568799		Chr1	10720400	10721999
Chr1	21592800	21593999		Chr1	10724000	10724399
Chr1	21635200	21635599		Chr1	10739800	10740199
Chr1	21702800	21704999		Chr1	10764600	10765199
Chr1	21726200	21727399		Chr1	10805800	10806399
Chr1	21734000	21735199		Chr1	10822200	10822999
Chr1	21791800	21792999		Chr1	10829400	10829999
Chr1	21807200	21807999		Chr1	10875200	10876399
Chr1	21809200	21810399		Chr1	10881000	10881599
Chr1	21859000	21860199		Chr1	10923000	10923999
Chr1	21871000	21872399		Chr1	10943400	10944199
Chr1	21883200	21884599		Chr1	10944800	10945599
Chr1	21902800	21903599		Chr1	10964800	10966799
Chr1	21908000	21908999		Chr1	10972400	10973199
Chr1	21921400	21922799		Chr1	11007800	11008399
Chr1	21930800	21931799		Chr1	11017800	11019199
Chr1	21933800	21935199		Chr1	11038200	11038999
Chr1	21946200	21946999		Chr1	11040600	11041399
Chr1	21974200	21974799		Chr1	11045200	11045799
Chr1	22011200	22012199		Chr1	11063000	11063799
Chr1	22021600	22023399		Chr1	11067000	11067399
Chr1	22032600	22033199		Chr1	11081400	11082399
Chr1	22048000	22049399		Chr1	11098400	11098799
Chr1	22074600	22075599		Chr1	11159400	11160599
Chr1	22077800	22078399		Chr1	11162000	11162399
Chr1	22080200	22081599		Chr1	11195600	11196599
Chr1	22110200	22112199		Chr1	11225800	11226399
Chr1	22275800	22276799		Chr1	11227400	11228399
Chr1	22485800	22486999		Chr1	11281200	11282599
Chr1	22490800	22491599		Chr1	11321200	11322599
Chr1	22528800	22529599		Chr1	11331400	11331599
Chr1	22535600	22536599		Chr1	11336000	11336599
Chr1	22645600	22647599		Chr1	11337600	11338399
Chr1	22649400	22650599		Chr1	11383400	11385999
Chr1	22812000	22812999		Chr1	11388600	11390399
Chr1	22873600	22874199		Chr1	11391000	11393399
Chr1	22908400	22910399		Chr1	11430200	11431799
Chr1	22916200	22917199		Chr1	11444000	11444399
Chr1	22922400	22923199		Chr1	11474800	11475799
Chr1	22951800	22952799		Chr1	11501000	11501399
Chr1	22959200	22960399		Chr1	11502000	11502399
Chr1	23021600	23022399		Chr1	11510600	11510999
Chr1	23074000	23075199		Chr1	11513400	11514599
Chr1	23147800	23149199		Chr1	11523200	11524799
Chr1	23225600	23226799		Chr1	11558000	11558599
Chr1	23276600	23277399		Chr1	11559400	11559999
Chr1	23299000	23299999		Chr1	11595600	11595999
Chr1	23355600	23356399		Chr1	11637000	11637599
Chr1	23462400	23463399		Chr1	11674200	11675199
Chr1	23484200	23484799		Chr1	11676000	11676599
Chr1	23568600	23569599		Chr1	11698800	11699599
Chr1	23622800	23623799		Chr1	11715400	11716199
Chr1	23721600	23722799		Chr1	11716800	11717999
Chr1	23731000	23731999		Chr1	11720400	11722199
Chr1	23732600	23733399		Chr1	11722800	11723999
Chr1	23817800	23818799		Chr1	11724400	11725399
Chr1	23847200	23848799		Chr1	11741000	11742799
Chr1	23964000	23964999		Chr1	11783400	11784199
Chr1	24001600	24002599		Chr1	11791600	11793399
Chr1	24075400	24076999		Chr1	11818600	11819599
Chr1	24146400	24147199		Chr1	11824800	11825399
Chr1	24190400	24191199		Chr1	11855200	11855799
Chr1	24199600	24200999		Chr1	11861400	11861799
Chr1	24258600	24259999		Chr1	11879200	11880199
Chr1	24264200	24265799		Chr1	11907200	11908199
Chr1	24280800	24282199		Chr1	11967400	11968599
Chr1	24319200	24319599		Chr1	11988200	11989199
Chr1	24460000	24460599		Chr1	11992800	11994799
Chr1	24464800	24465399		Chr1	11995600	11996799
Chr1	24545200	24546599		Chr1	12056400	12058399
Chr1	24557200	24558999		Chr1	12082400	12082999
Chr1	24623400	24623799		Chr1	12089200	12090199
Chr1	24638200	24638799		Chr1	12129800	12131199
Chr1	24725400	24726199		Chr1	12132800	12133399
Chr1	24732400	24732999		Chr1	12142800	12143399
Chr1	24742000	24742399		Chr1	12154200	12154799
Chr1	24766000	24767199		Chr1	12159600	12159999
Chr1	24789200	24789799		Chr1	12184800	12186599
Chr1	24808800	24810199		Chr1	12203400	12203999
Chr1	24817800	24819199		Chr1	12205400	12206399
Chr1	24852200	24853799		Chr1	12214000	12214799
Chr1	24923000	24923599		Chr1	12217400	12217999
Chr1	24938000	24938599		Chr1	12238800	12239999
Chr1	24956200	24957999		Chr1	12248000	12248399
Chr1	24965000	24965999		Chr1	12266000	12266599
Chr1	25011600	25012399		Chr1	12283200	12284599
Chr1	25017400	25018799		Chr1	12285200	12285599
Chr1	25029800	25031799		Chr1	12295000	12295799
Chr1	25160600	25161999		Chr1	12316800	12317199
Chr1	25166200	25166799		Chr1	12326600	12326999
Chr1	25294600	25296199		Chr1	12336400	12337199
Chr1	25420400	25422199		Chr1	12369600	12370199
Chr1	25431800	25432999		Chr1	12392000	12392999
Chr1	25460000	25461399		Chr1	12418000	12420199
Chr1	25551400	25552599		Chr1	12422200	12422599
Chr1	25638200	25639399		Chr1	12474000	12474399
Chr1	25853200	25854199		Chr1	12570400	12571199
Chr1	25900400	25901199		Chr1	12573600	12574199
Chr1	25906800	25907599		Chr1	12619200	12620999
Chr1	25929400	25930199		Chr1	12655200	12656199
Chr1	25967000	25967599		Chr1	12695600	12696199
Chr1	26008600	26009399		Chr1	12713600	12714199
Chr1	26040600	26041199		Chr1	12739800	12740199
Chr1	26109800	26111199		Chr1	12757000	12757599
Chr1	26189200	26189799		Chr1	12779400	12779999
Chr1	26203600	26204999		Chr1	12809400	12809999
Chr1	26224800	26225599		Chr1	12910400	12911199
Chr1	26246000	26246799		Chr1	12945800	12946399
Chr1	26343600	26344399		Chr1	12989400	12990199
Chr1	26426400	26426799		Chr1	12991600	12992199
Chr1	26430600	26431199		Chr1	12999000	13002199
Chr1	26431800	26432599		Chr1	13027400	13027999
Chr1	26484600	26485399		Chr1	13111000	13112599
Chr1	26586400	26586999		Chr1	13113400	13114599
Chr1	26607000	26607999		Chr1	13115200	13116199
Chr1	26656000	26657199		Chr1	13146200	13146999
Chr1	26747200	26749599		Chr1	13147800	13148399
Chr1	26761000	26762199		Chr1	13157200	13157799
Chr1	26847400	26848399		Chr1	13161600	13162199
Chr1	26889400	26890799		Chr1	13165600	13166599
Chr1	26904600	26905599		Chr1	13196600	13197399
Chr1	27005000	27005999		Chr1	13202200	13202999
Chr1	27007400	27008199		Chr1	13220400	13224399
Chr1	27042600	27044199		Chr1	13225000	13226599
Chr1	27047800	27048599		Chr1	13231400	13231999
Chr1	27063400	27065999		Chr1	13272600	13273199
Chr1	27087600	27088199		Chr1	13287800	13288199
Chr1	27108600	27109599		Chr1	13296200	13296999
Chr1	27133600	27135199		Chr1	13305800	13306399
Chr1	27172000	27172799		Chr1	13310000	13310599
Chr1	27186600	27187199		Chr1	13323000	13323999
Chr1	27195600	27196799		Chr1	13326000	13326999
Chr1	27205600	27207799		Chr1	13339400	13340799
Chr1	27224800	27225399		Chr1	13341800	13342599
Chr1	27228800	27229199		Chr1	13372400	13372799
Chr1	27235000	27235599		Chr1	13385200	13385399
Chr1	27354600	27355399		Chr1	13394800	13395199
Chr1	27477000	27477799		Chr1	13396200	13397199
Chr1	27489400	27490999		Chr1	13459000	13460399
Chr1	27504200	27505199		Chr1	13472800	13473399
Chr1	27537000	27537999		Chr1	13532000	13532599
Chr1	27574000	27575199		Chr1	13537000	13537399
Chr1	27578200	27578799		Chr1	13553600	13553999
Chr1	27583400	27584599		Chr1	13570200	13571199
Chr1	27598000	27598599		Chr1	13600600	13601199
Chr1	27614000	27614599		Chr1	13603000	13604399
Chr1	27636000	27636399		Chr1	13609400	13609999
Chr1	27652600	27653399		Chr1	13616600	13616999
Chr1	27662600	27664199		Chr1	13620400	13620799
Chr1	27670400	27671799		Chr1	13621600	13622599
Chr1	27686600	27686999		Chr1	13661200	13661399
Chr1	27725800	27727399		Chr1	13697200	13697599
Chr1	27728800	27730599		Chr1	13704800	13705399
Chr1	27735000	27736199		Chr1	13706000	13708799
Chr1	27753200	27754399		Chr1	13716800	13717799
Chr1	27761200	27762399		Chr1	13757600	13758999
Chr1	27827000	27828399		Chr1	13816000	13816799
Chr1	27863000	27863599		Chr1	13821400	13821999
Chr1	27875400	27877199		Chr1	13841800	13842999
Chr1	27886000	27886999		Chr1	13877800	13878599
Chr1	27972000	27973199		Chr1	13896200	13896599
Chr1	27997400	27998599		Chr1	13937000	13937599
Chr1	28003000	28003799		Chr1	13982600	13983999
Chr1	28008200	28008799		Chr1	14026000	14026399
Chr1	28020600	28021199		Chr1	14034800	14035199
Chr1	28035400	28035799		Chr1	14043800	14044799
Chr1	28153400	28154999		Chr1	14046600	14046999
Chr1	28202600	28203199		Chr1	14047800	14048599
Chr1	28210400	28212599		Chr1	14058200	14058799
Chr1	28269000	28271399		Chr1	14065600	14066599
Chr1	28280400	28281199		Chr1	14072800	14073599
Chr1	28388000	28388599		Chr1	14076000	14076799
Chr1	28417000	28417799		Chr1	14082000	14082999
Chr1	28423800	28424199		Chr1	14090600	14091399
Chr1	28456800	28458399		Chr1	14122000	14123599
Chr1	28526000	28526999		Chr1	14128200	14128799
Chr1	28534000	28535199		Chr1	14129200	14129599
Chr1	28583000	28583599		Chr1	14130800	14132999
Chr1	28591000	28591399		Chr1	14171200	14171599
Chr1	28637800	28638999		Chr1	14203600	14204199
Chr1	28711600	28712399		Chr1	14210600	14211599
Chr1	28741600	28742599		Chr1	14220400	14220999
Chr1	28775400	28776799		Chr1	14236800	14237399
Chr1	28801800	28802199		Chr1	14247600	14248599
Chr1	28878200	28881399		Chr1	14251800	14252399
Chr1	28899000	28899599		Chr1	14261800	14262399
Chr1	28956600	28957399		Chr1	14264000	14265599
Chr1	29102400	29103399		Chr1	14319000	14319599
Chr1	29138000	29138799		Chr1	14411400	14412799
Chr1	29232400	29233199		Chr1	14415200	14417599
Chr1	29267200	29268199		Chr1	14421400	14421999
Chr1	29277200	29278199		Chr1	14422800	14423799
Chr1	29362200	29363599		Chr1	14424200	14426799
Chr1	29381400	29382599		Chr1	14481000	14481799
Chr1	29397400	29398599		Chr1	14531200	14531599
Chr1	29426000	29427799		Chr1	14590400	14591799
Chr1	29486200	29487599		Chr1	14619000	14620799
Chr1	29506200	29507599		Chr1	14627800	14628399
Chr1	29625000	29625399		Chr1	14635000	14635399
Chr1	29631000	29633199		Chr1	14644800	14644999
Chr1	29691400	29692199		Chr1	14708600	14710599
Chr1	29761400	29761799		Chr1	14737600	14738399
Chr1	29772000	29772799		Chr1	14747800	14748799
Chr1	29851200	29853199		Chr1	14749400	14750199
Chr1	29867800	29868399		Chr1	14787800	14788399
Chr1	29898600	29899399		Chr1	14809600	14809999
Chr1	29913400	29914399		Chr1	14829800	14830199
Chr1	29968200	29968999		Chr1	14839000	14839199
Chr1	29969600	29970599		Chr1	14846200	14846999
Chr1	30004800	30005799		Chr1	14849600	14849999
Chr1	30008800	30009399		Chr1	14879600	14880199
Chr1	30051400	30052399		Chr1	14895600	14896799
Chr1	30057000	30057999		Chr1	14900800	14901199
Chr1	30097200	30098399		Chr1	14912800	14913399
Chr1	30110000	30111599		Chr1	14915000	14915799
Chr1	30182800	30183799		Chr1	14928200	14929599
Chr1	30371400	30372199		Chr1	14933400	14933999
Chr1	30424400	30426199		Chr1	14977400	14978199
Chr1	30469200	30470399		Chr1	14997600	14998199
Chr1	30511000	30511799		Chr1	15010600	15011199
Chr1	30515600	30516399		Chr1	15025600	15026199
Chr1	30629000	30629599		Chr1	15055000	15055799
Chr1	30664800	30665599		Chr1	15087800	15088599
Chr1	30711000	30711999		Chr1	15094000	15094799
Chr1	30726400	30727599		Chr1	15140800	15142399
Chr1	30769800	30770999		Chr1	15160400	15161999
Chr1	30815800	30816799		Chr1	15166800	15168199
Chr1	30827000	30827599		Chr1	15183600	15184599
Chr1	30850400	30850999		Chr1	15193000	15193799
Chr1	30855000	30855799		Chr1	15222600	15223199
Chr1	30858800	30859199		Chr1	15225200	15225599
Chr1	30874200	30875199		Chr1	15258800	15259399
Chr1	30939200	30939799		Chr1	15277000	15278999
Chr1	30973800	30974999		Chr1	15281600	15281999
Chr1	31032600	31033199		Chr1	15285600	15287199
Chr1	31094200	31094999		Chr1	15299200	15300399
Chr1	31099800	31101999		Chr1	15318000	15318999
Chr1	31119800	31120799		Chr1	15319400	15322799
Chr1	31150200	31150599		Chr1	15325200	15325999
Chr1	31158400	31159799		Chr1	15385000	15385799
Chr1	31214200	31214599		Chr1	15397200	15397599
Chr1	31375800	31376599		Chr1	15419200	15420999
Chr1	31414800	31415399		Chr1	15428600	15428799
Chr1	31424800	31425399		Chr1	15458800	15459799
Chr1	31503000	31503999		Chr1	15478000	15478599
Chr1	31722800	31723599		Chr1	15505800	15506399
Chr1	31741800	31742199		Chr1	15539600	15541199
Chr1	31759600	31760999		Chr1	15564600	15565199
Chr1	31770600	31771399		Chr1	15594400	15594799
Chr1	31820600	31822599		Chr1	15595200	15595999
Chr1	31905000	31905999		Chr1	15612400	15614399
Chr1	31908800	31909399		Chr1	15627000	15627799
Chr1	31926800	31927599		Chr1	15641000	15641399
Chr1	31961000	31961599		Chr1	15649400	15650599
Chr1	32004600	32005399		Chr1	15686200	15687199
Chr1	32019400	32020599		Chr1	15689400	15690199
Chr1	32026000	32027599		Chr1	15691000	15691999
Chr1	32140200	32141399		Chr1	15709600	15711599
Chr1	32164200	32164999		Chr1	15716400	15717799
Chr1	32219000	32220399		Chr1	15764600	15764999
Chr1	32248400	32248999		Chr1	15767400	15768599
Chr1	32314200	32314999		Chr1	15781600	15781999
Chr1	32332000	32333199		Chr1	15802400	15805799
Chr1	32383800	32385199		Chr1	15814400	15815399
Chr1	32419200	32419799		Chr1	15880800	15881399
Chr1	32423400	32424999		Chr1	15890600	15892399
Chr1	32616000	32617599		Chr1	15916000	15916799
Chr1	32661400	32662399		Chr1	15920600	15921399
Chr1	32701800	32702599		Chr1	15939400	15939999
Chr1	32713400	32713999		Chr1	15958000	15958399
Chr1	32820000	32820999		Chr1	15962000	15963199
Chr1	33006200	33007199		Chr1	15997400	15998599
Chr1	33099400	33099999		Chr1	16005200	16006199
Chr1	33145000	33145999		Chr1	16017200	16020199
Chr1	33217600	33219799		Chr1	16035000	16035999
Chr1	33245000	33246399		Chr1	16043200	16044199
Chr1	33268200	33268799		Chr1	16045000	16046799
Chr1	33337000	33337999		Chr1	16109400	16110599
Chr1	33379200	33380199		Chr1	16130200	16131199
Chr1	33530200	33530799		Chr1	16140200	16140599
Chr1	33650800	33652199		Chr1	16239200	16239999
Chr1	33722200	33723399		Chr1	16240400	16241199
Chr1	33723800	33724599		Chr1	16251800	16252799
Chr1	33746200	33746999		Chr1	16314800	16315999
Chr1	33760400	33761799		Chr1	16353400	16354799
Chr1	33825600	33826399		Chr1	16361600	16362399
Chr1	33866400	33867199		Chr1	16395400	16397199
Chr1	33905800	33907199		Chr1	16397600	16398199
Chr1	33931800	33932599		Chr1	16401400	16403599
Chr1	33962800	33963399		Chr1	16410000	16412599
Chr1	33969600	33970199		Chr1	16418400	16418599
Chr1	34020000	34021199		Chr1	16426400	16426799
Chr1	34022200	34023399		Chr1	16430200	16430999
Chr1	34037000	34038399		Chr1	16431800	16432599
Chr1	34065400	34066199		Chr1	16437200	16438999
Chr1	34148200	34149199		Chr1	16443200	16444399
Chr1	34152600	34153799		Chr1	16480400	16481199
Chr1	34168200	34170199		Chr1	16500000	16500399
Chr1	34177400	34178199		Chr1	16505600	16506999
Chr1	34304600	34305799		Chr1	16518200	16518599
Chr1	34357600	34359999		Chr1	16522000	16523199
Chr1	34481600	34482599		Chr1	16544400	16545199
Chr1	34488600	34489399		Chr1	16550800	16551399
Chr1	34515400	34517999		Chr1	16562800	16563599
Chr1	34585000	34585799		Chr1	16572600	16572999
Chr1	34611400	34611999		Chr1	16607800	16608399
Chr1	34637800	34638599		Chr1	16614200	16614399
Chr1	34662400	34663999		Chr1	16635200	16635799
Chr1	34865400	34866199		Chr1	16673600	16677199
Chr1	34891600	34892999		Chr1	16677600	16678799
Chr1	34899000	34899799		Chr1	16682200	16682599
Chr1	34900800	34901999		Chr1	16688400	16691199
Chr1	34912400	34913199		Chr1	16691600	16692399
Chr1	34917000	34919999		Chr1	16693200	16694199
Chr1	34934400	34934999		Chr1	16696600	16698599
Chr1	34935400	34941999		Chr1	16722400	16722799
Chr1	34972600	34973199		Chr1	16730800	16731999
Chr1	35006000	35006799		Chr1	16772600	16772999
Chr1	35009200	35009999		Chr1	16787000	16787599
Chr1	35031200	35031999		Chr1	16793400	16794199
Chr1	35032400	35033199		Chr1	16828800	16829399
Chr1	35066400	35067799		Chr1	16849200	16849799
Chr1	35073400	35074399		Chr1	16852400	16852999
Chr1	35076000	35076999		Chr1	16884000	16884199
Chr1	35091000	35091799		Chr1	16911200	16913799
Chr1	35309000	35309399		Chr1	16965800	16966399
Chr1	35334800	35335999		Chr1	17021600	17023599
Chr1	35375000	35376199		Chr1	17024600	17025599
Chr1	35397600	35398599		Chr1	17037600	17038199
Chr1	35422600	35423799		Chr1	17058800	17059399
Chr1	35436600	35437199		Chr1	17079000	17079399
Chr1	35490200	35491399		Chr1	17099000	17099599
Chr1	35533400	35533999		Chr1	17150200	17150599
Chr1	35636200	35636799		Chr1	17177600	17178199
Chr1	35694600	35695999		Chr1	17199000	17199599
Chr1	35709200	35710599		Chr1	17217800	17218199
Chr1	35735800	35737399		Chr1	17230400	17231999
Chr1	35787400	35788599		Chr1	17260200	17260799
Chr1	35952000	35952399		Chr1	17266200	17266999
Chr1	36123000	36123999		Chr1	17291000	17291399
Chr1	36201600	36202799		Chr1	17302000	17303399
Chr1	36219000	36220199		Chr1	17312000	17315199
Chr1	36244600	36245799		Chr1	17323600	17323799
Chr1	36309600	36310199		Chr1	17349200	17350599
Chr1	36340800	36341799		Chr1	17354400	17355199
Chr1	36363600	36364399		Chr1	17396400	17397399
Chr1	36369600	36370599		Chr1	17432800	17433599
Chr1	36477600	36480399		Chr1	17444800	17445399
Chr1	36733400	36734999		Chr1	17445800	17446599
Chr1	36902600	36903199		Chr1	17449800	17450199
Chr1	36941800	36943199		Chr1	17452400	17453399
Chr1	36960400	36960999		Chr1	17459200	17459999
Chr1	36991600	36992599		Chr1	17481200	17481799
Chr1	37091600	37092199		Chr1	17493800	17494199
Chr1	37179000	37179799		Chr1	17517600	17518399
Chr1	37231800	37232199		Chr1	17522400	17522999
Chr1	37288200	37289199		Chr1	17535800	17536799
Chr1	37298000	37298599		Chr1	17539400	17540199
Chr1	37324600	37325399		Chr1	17567400	17568599
Chr1	37433200	37434199		Chr1	17614200	17614999
Chr1	37512400	37513799		Chr1	17627200	17628599
Chr1	37578200	37579399		Chr1	17629800	17630599
Chr1	37582200	37583199		Chr1	17631800	17633999
Chr1	37659200	37660799		Chr1	17692800	17693599
Chr1	37669400	37670799		Chr1	17707200	17707799
Chr1	37713200	37713999		Chr1	17714200	17715199
Chr1	37758600	37759799		Chr1	17741600	17742199
Chr1	37861200	37862399		Chr1	17789600	17790599
Chr1	37927600	37928799		Chr1	17804400	17808199
Chr1	37964000	37964999		Chr1	17820400	17823999
Chr1	38009000	38009999		Chr1	17846000	17846599
Chr1	38046000	38048199		Chr1	17847000	17848599
Chr1	38083800	38085199		Chr1	17852000	17853399
Chr1	38095400	38096399		Chr1	17859000	17859399
Chr1	38158200	38158999		Chr1	17869000	17869399
Chr1	38164000	38164399		Chr1	17886400	17886999
Chr1	38195000	38195599		Chr1	17892200	17893199
Chr1	38197400	38199199		Chr1	17902000	17903599
Chr1	38204200	38205399		Chr1	17945400	17946399
Chr1	38212400	38213799		Chr1	17953000	17953399
Chr1	38264200	38265799		Chr1	18029800	18030399
Chr1	38268400	38268799		Chr1	18045800	18046199
Chr1	38339600	38341199		Chr1	18064800	18066199
Chr1	38409600	38410199		Chr1	18070600	18070999
Chr1	38431400	38432399		Chr1	18080800	18082199
Chr1	38445200	38446399		Chr1	18097400	18098399
Chr1	38458400	38460999		Chr1	18100400	18100999
Chr1	38472200	38472999		Chr1	18110200	18111199
Chr1	38509000	38510999		Chr1	18208800	18209199
Chr1	38535200	38535999		Chr1	18219000	18219999
Chr1	38560600	38561999		Chr1	18224800	18224999
Chr1	38567200	38567999		Chr1	18268400	18269399
Chr1	38569600	38570199		Chr1	18270200	18270999
Chr1	38620600	38622399		Chr1	18283000	18283999
Chr1	38783000	38783599		Chr1	18284600	18286399
Chr1	38784800	38785999		Chr1	18341000	18341799
Chr1	38860200	38861799		Chr1	18343200	18344199
Chr1	38864200	38865199		Chr1	18348600	18350399
Chr1	38866400	38866999		Chr1	18392000	18393999
Chr1	38876000	38878999		Chr1	18402200	18403199
Chr1	38884600	38886399		Chr1	18435600	18436599
Chr1	38891400	38892199		Chr1	18444400	18445599
Chr1	38896400	38896999		Chr1	18460600	18461799
Chr1	38929000	38930399		Chr1	18472200	18472599
Chr1	38933000	38934199		Chr1	18495800	18496199
Chr1	38992600	38993399		Chr1	18543800	18545599
Chr1	39017600	39018999		Chr1	18555200	18556599
Chr1	39132200	39133999		Chr1	18566000	18567999
Chr1	39134600	39135599		Chr1	18574800	18575399
Chr1	39137400	39138199		Chr1	18589600	18590399
Chr1	39143400	39144199		Chr1	18594800	18595599
Chr1	39145800	39146599		Chr1	18596600	18597799
Chr1	39149200	39150799		Chr1	18609600	18610399
Chr1	39155200	39155799		Chr1	18617400	18618599
Chr1	39161400	39162199		Chr1	18634800	18635799
Chr1	39171800	39172199		Chr1	18636200	18636799
Chr1	39247000	39247599		Chr1	18699000	18699199
Chr1	39278400	39279399		Chr1	18726400	18726799
Chr1	39323000	39324199		Chr1	18730600	18731199
Chr1	39381800	39382799		Chr1	18751600	18751999
Chr1	39389400	39390199		Chr1	18802200	18802599
Chr1	39417600	39418399		Chr1	18828600	18831599
Chr1	39423600	39424399		Chr1	18841000	18842199
Chr1	39431800	39432399		Chr1	18864800	18865399
Chr1	39461200	39462199		Chr1	18888200	18889399
Chr1	39488800	39490199		Chr1	18892600	18893999
Chr1	39548000	39548799		Chr1	18896000	18897199
Chr1	39620200	39621599		Chr1	18907400	18907999
Chr1	39661800	39662599		Chr1	18934200	18937399
Chr1	39665400	39666199		Chr1	18970800	18971399
Chr1	39683200	39683799		Chr1	19046400	19046799
Chr1	39763600	39764199		Chr1	19053800	19054199
Chr1	39773400	39773999		Chr1	19057400	19057999
Chr1	39785800	39787199		Chr1	19078000	19078799
Chr1	39807800	39808799		Chr1	19100000	19100799
Chr1	39817600	39818999		Chr1	19102200	19102799
Chr1	39830200	39831199		Chr1	19149600	19150399
Chr1	39849600	39850599		Chr1	19155600	19156399
Chr1	39954800	39956199		Chr1	19192600	19193799
Chr1	39961400	39961999		Chr1	19284600	19285399
Chr1	39966400	39967199		Chr1	19291600	19292199
Chr1	40028000	40028999		Chr1	19292600	19293399
Chr1	40041400	40041799		Chr1	19345600	19347199
Chr1	40058400	40059399		Chr1	19358800	19360799
Chr1	40065200	40066199		Chr1	19377200	19377799
Chr1	40074200	40075199		Chr1	19414600	19415399
Chr1	40081000	40081999		Chr1	19429800	19430599
Chr1	40103400	40103999		Chr1	19437000	19437399
Chr1	40127600	40129199		Chr1	19446200	19446799
Chr1	40142000	40144399		Chr1	19465200	19465999
Chr1	40169600	40170999		Chr1	19468000	19468599
Chr1	40189400	40190199		Chr1	19474400	19475799
Chr1	40251200	40251599		Chr1	19507600	19508399
Chr1	40268200	40269199		Chr1	19575400	19576599
Chr1	40364000	40364599		Chr1	19596800	19597399
Chr1	40367600	40368399		Chr1	19608000	19608799
Chr1	40400200	40400799		Chr1	19644600	19645999
Chr1	40457800	40458399		Chr1	19676800	19676999
Chr1	40566800	40567999		Chr1	19713800	19714599
Chr1	40568400	40569399		Chr1	19715800	19716199
Chr1	40576000	40577999		Chr1	19716600	19717399
Chr1	40631400	40632399		Chr1	19773400	19774199
Chr1	40662200	40663399		Chr1	19776800	19777199
Chr1	40684400	40685799		Chr1	19817600	19821399
Chr1	40705400	40706999		Chr1	19827400	19829799
Chr1	40719400	40720199		Chr1	19843000	19843599
Chr1	40740800	40741399		Chr1	19851000	19851399
Chr1	40786200	40787399		Chr1	19864800	19865399
Chr1	40790000	40790999		Chr1	19886600	19886999
Chr1	40826800	40828599		Chr1	19909200	19909799
Chr1	40892400	40893199		Chr1	19959800	19960399
Chr1	40944800	40945599		Chr1	19982600	19983399
Chr1	41036000	41036799		Chr1	20024800	20025799
Chr1	41057000	41057799		Chr1	20040000	20040599
Chr1	41058600	41059599		Chr1	20055200	20056199
Chr1	41095800	41097199		Chr1	20061800	20062599
Chr1	41111200	41112199		Chr1	20113600	20113999
Chr1	41120600	41121999		Chr1	20115600	20117199
Chr1	41192000	41192599		Chr1	20124200	20124799
Chr1	41214600	41215599		Chr1	20141000	20141999
Chr1	41299600	41300599		Chr1	20153400	20153999
Chr1	41381400	41382199		Chr1	20186600	20187199
Chr1	41510000	41511399		Chr1	20214800	20215799
Chr1	41530600	41531399		Chr1	20221200	20221999
Chr1	41543200	41544999		Chr1	20225800	20226999
Chr1	41735600	41737799		Chr1	20227600	20229399
Chr1	41744400	41744799		Chr1	20277600	20278399
Chr1	41864400	41865999		Chr1	20280800	20281599
Chr1	41893400	41894799		Chr1	20373400	20373999
Chr1	41941400	41942799		Chr1	20397600	20398799
Chr1	42034200	42035399		Chr1	20436000	20436199
Chr1	42138200	42138799		Chr1	20450600	20451199
Chr1	42140600	42141799		Chr1	20464000	20464599
Chr1	42210000	42210799		Chr1	20479000	20479199
Chr1	42247600	42247999		Chr1	20526800	20527799
Chr1	42254000	42255199		Chr1	20528800	20529399
Chr1	42485000	42486399		Chr1	20595000	20595399
Chr1	42542000	42542999		Chr1	20634600	20635799
Chr1	42595800	42597399		Chr1	20707600	20708799
Chr1	42631400	42632799		Chr1	20713400	20714399
Chr1	42638600	42640199		Chr1	20728800	20729999
Chr1	42685200	42686599		Chr1	20734600	20735199
Chr1	42740800	42741999		Chr1	20743000	20744399
Chr1	42752600	42754199		Chr1	20758200	20758999
Chr1	42761200	42762199		Chr1	20779200	20780599
Chr1	42814400	42815399		Chr1	20785200	20786399
Chr1	42846200	42848399		Chr1	20791200	20792199
Chr1	42851000	42852199		Chr1	20813200	20814399
Chr1	42863200	42864199		Chr1	20820800	20821999
Chr1	42917400	42918199		Chr1	21010800	21011199
Chr1	42918600	42919799		Chr1	21012800	21014199
Chr1	43120400	43120999		Chr1	21026000	21026799
Chr1	43124600	43126199		Chr1	21063600	21064599
Chr1	43129600	43130999		Chr1	21066600	21067999
Chr1	43140000	43140999		Chr1	21100400	21100999
Chr1	43157800	43159199		Chr1	21111600	21112399
Chr1	43169200	43169999		Chr1	21137800	21138799
Chr1	43186000	43188199		Chr1	21174600	21175399
Chr1	43252800	43253599		Chr1	21191600	21193399
Chr2	27800	28599		Chr1	21244600	21245199
Chr2	37200	38199		Chr1	21363800	21364599
Chr2	55200	56399		Chr1	21368800	21369599
Chr2	62400	64399		Chr1	21373000	21376199
Chr2	66800	67399		Chr1	21391000	21391799
Chr2	69800	72599		Chr1	21397400	21398599
Chr2	75400	76599		Chr1	21400800	21401999
Chr2	80400	81199		Chr1	21466800	21467599
Chr2	89600	90999		Chr1	21480600	21480999
Chr2	211600	212399		Chr1	21522600	21523199
Chr2	215000	216199		Chr1	21532600	21533399
Chr2	287800	288799		Chr1	21542600	21544199
Chr2	300000	301199		Chr1	21553400	21554799
Chr2	310000	310799		Chr1	21555600	21556799
Chr2	315400	316199		Chr1	21557600	21557999
Chr2	413600	414399		Chr1	21568000	21568599
Chr2	438800	439799		Chr1	21582200	21583399
Chr2	486200	487199		Chr1	21591400	21591999
Chr2	497000	498599		Chr1	21604400	21605799
Chr2	531400	531999		Chr1	21609200	21610199
Chr2	570400	571799		Chr1	21618200	21619199
Chr2	572200	574199		Chr1	21675400	21676399
Chr2	575200	576999		Chr1	21704200	21704599
Chr2	623800	624999		Chr1	21805200	21805799
Chr2	732800	733799		Chr1	21824400	21827599
Chr2	768800	769399		Chr1	21889800	21890399
Chr2	781800	783999		Chr1	21896600	21897599
Chr2	842000	843199		Chr1	21903000	21903399
Chr2	857400	858999		Chr1	21912400	21913399
Chr2	1039600	1041199		Chr1	21916600	21916999
Chr2	1116600	1117199		Chr1	21964600	21964799
Chr2	1131000	1131399		Chr1	21973000	21974599
Chr2	1179200	1180399		Chr1	22021400	22022199
Chr2	1204800	1205599		Chr1	22030400	22030799
Chr2	1207200	1207799		Chr1	22044200	22045399
Chr2	1327200	1330199		Chr1	22049000	22049399
Chr2	1374000	1374999		Chr1	22068200	22068599
Chr2	1452200	1452599		Chr1	22078800	22079399
Chr2	1479800	1480599		Chr1	22081000	22081599
Chr2	1564200	1564999		Chr1	22110000	22111599
Chr2	1598400	1599599		Chr1	22141200	22141999
Chr2	1605600	1606599		Chr1	22148200	22149399
Chr2	1621800	1623599		Chr1	22181600	22182199
Chr2	1702600	1703599		Chr1	22193400	22195199
Chr2	1737600	1738199		Chr1	22207000	22207999
Chr2	1742600	1744399		Chr1	22210200	22211599
Chr2	1754400	1755799		Chr1	22279000	22279599
Chr2	1762800	1763599		Chr1	22307200	22307599
Chr2	1788800	1790199		Chr1	22309000	22310599
Chr2	1818600	1819599		Chr1	22331400	22333599
Chr2	1832600	1833599		Chr1	22336400	22336599
Chr2	1836000	1836799		Chr1	22337600	22338399
Chr2	1880800	1881999		Chr1	22360600	22362399
Chr2	1887200	1887799		Chr1	22370000	22370799
Chr2	1906000	1907399		Chr1	22392400	22393399
Chr2	1916600	1917399		Chr1	22401200	22407799
Chr2	1917800	1919199		Chr1	22408200	22410799
Chr2	1954200	1955199		Chr1	22416600	22417999
Chr2	1970600	1971199		Chr1	22523600	22523999
Chr2	2019600	2019999		Chr1	22528800	22529799
Chr2	2193400	2193799		Chr1	22546400	22546999
Chr2	2218000	2218999		Chr1	22563200	22563999
Chr2	2283800	2284999		Chr1	22627600	22628199
Chr2	2431000	2431999		Chr1	22645200	22646799
Chr2	2607200	2607999		Chr1	22693200	22694199
Chr2	2637400	2638599		Chr1	22709400	22710199
Chr2	2644800	2647199		Chr1	22742200	22742799
Chr2	2749400	2750199		Chr1	22767800	22769599
Chr2	2791400	2792999		Chr1	22822400	22823199
Chr2	2805600	2807399		Chr1	22823800	22823999
Chr2	2867400	2868199		Chr1	22831200	22832599
Chr2	2881000	2881999		Chr1	22861000	22862399
Chr2	2919400	2919999		Chr1	22908600	22909799
Chr2	2920800	2922599		Chr1	22922600	22923199
Chr2	3135000	3135399		Chr1	22964000	22964599
Chr2	3198200	3199199		Chr1	23019600	23020199
Chr2	3298400	3299399		Chr1	23027800	23028199
Chr2	3440800	3441799		Chr1	23032800	23033799
Chr2	3448400	3449199		Chr1	23034200	23034999
Chr2	3485000	3486199		Chr1	23036800	23037199
Chr2	3490000	3491399		Chr1	23073600	23075599
Chr2	3551800	3552599		Chr1	23095600	23095999
Chr2	3581600	3582599		Chr1	23099200	23099799
Chr2	3591600	3592399		Chr1	23111200	23111999
Chr2	3594000	3594799		Chr1	23117400	23118199
Chr2	3745600	3746799		Chr1	23161000	23161399
Chr2	3784200	3784999		Chr1	23164600	23165599
Chr2	3828000	3828799		Chr1	23173600	23174399
Chr2	3840000	3840999		Chr1	23187400	23188799
Chr2	3859000	3860399		Chr1	23225400	23226399
Chr2	3862600	3863599		Chr1	23266000	23267599
Chr2	3972000	3972599		Chr1	23270800	23272999
Chr2	3999200	4000799		Chr1	23276600	23277599
Chr2	4021800	4023399		Chr1	23279600	23280799
Chr2	4026200	4027399		Chr1	23283200	23283599
Chr2	4083600	4084599		Chr1	23289800	23290799
Chr2	4123600	4124799		Chr1	23299000	23299799
Chr2	4131600	4132399		Chr1	23325600	23326399
Chr2	4135800	4136599		Chr1	23337600	23338599
Chr2	4138200	4139399		Chr1	23377800	23378799
Chr2	4142200	4143199		Chr1	23397400	23398599
Chr2	4172400	4173199		Chr1	23402200	23402999
Chr2	4173600	4174799		Chr1	23440600	23441399
Chr2	4175200	4177399		Chr1	23462400	23463199
Chr2	4201600	4202799		Chr1	23470400	23471199
Chr2	4229600	4230199		Chr1	23472400	23474399
Chr2	4449200	4451199		Chr1	23484200	23484799
Chr2	4570200	4571799		Chr1	23523200	23524799
Chr2	4574600	4575399		Chr1	23556800	23557599
Chr2	4577000	4578799		Chr1	23569800	23570799
Chr2	4579200	4579799		Chr1	23579800	23580199
Chr2	4617400	4617799		Chr1	23581200	23581999
Chr2	4628400	4628999		Chr1	23585000	23585999
Chr2	4667200	4667799		Chr1	23587000	23588199
Chr2	4688800	4689199		Chr1	23622400	23623399
Chr2	4709200	4710799		Chr1	23644800	23645399
Chr2	4738800	4739599		Chr1	23668200	23668599
Chr2	4775400	4776999		Chr1	23681400	23682199
Chr2	4784400	4785199		Chr1	23688400	23689399
Chr2	4821000	4821399		Chr1	23690200	23690999
Chr2	4875400	4876399		Chr1	23700000	23701199
Chr2	4898000	4898599		Chr1	23703800	23704399
Chr2	4935800	4936999		Chr1	23722200	23722799
Chr2	4954200	4956599		Chr1	23781200	23781999
Chr2	5041000	5042799		Chr1	23855600	23857799
Chr2	5060800	5061799		Chr1	23881800	23882199
Chr2	5067200	5068199		Chr1	23931400	23932199
Chr2	5101800	5102799		Chr1	23947400	23947999
Chr2	5127600	5128599		Chr1	23949800	23949999
Chr2	5134000	5135199		Chr1	23964000	23965199
Chr2	5136200	5136999		Chr1	24075400	24076599
Chr2	5185400	5186199		Chr1	24145800	24147199
Chr2	5209800	5210799		Chr1	24166400	24166799
Chr2	5248400	5248999		Chr1	24185600	24186399
Chr2	5298400	5299199		Chr1	24190000	24191199
Chr2	5346800	5347999		Chr1	24199200	24199999
Chr2	5362400	5363599		Chr1	24206000	24207199
Chr2	5373600	5374399		Chr1	24209400	24210799
Chr2	5395600	5396199		Chr1	24224600	24224999
Chr2	5435600	5436399		Chr1	24229600	24230599
Chr2	5560200	5560999		Chr1	24243600	24244599
Chr2	5592000	5592999		Chr1	24264000	24266399
Chr2	5595400	5595999		Chr1	24277000	24277599
Chr2	5599200	5600399		Chr1	24284800	24285799
Chr2	5604600	5605999		Chr1	24319400	24320399
Chr2	5612000	5612799		Chr1	24337600	24338399
Chr2	5627000	5629199		Chr1	24366800	24367599
Chr2	5630800	5631199		Chr1	24375800	24376199
Chr2	5682600	5683399		Chr1	24416000	24417599
Chr2	5757600	5758199		Chr1	24426000	24427199
Chr2	5832600	5834599		Chr1	24515800	24516399
Chr2	5923800	5924799		Chr1	24545800	24546799
Chr2	5962200	5963999		Chr1	24558400	24558999
Chr2	6106400	6106999		Chr1	24623400	24624199
Chr2	6226200	6226599		Chr1	24649000	24649599
Chr2	6238400	6239799		Chr1	24662400	24662999
Chr2	6487200	6487999		Chr1	24671000	24672399
Chr2	6631400	6631999		Chr1	24673400	24674599
Chr2	6669400	6670599		Chr1	24852200	24852999
Chr2	6679800	6680799		Chr1	24892000	24892599
Chr2	6685200	6685799		Chr1	24923000	24923999
Chr2	6717200	6717799		Chr1	24928400	24929399
Chr2	6740400	6741399		Chr1	24930200	24930799
Chr2	6743800	6744399		Chr1	24937000	24938399
Chr2	6760400	6761199		Chr1	25024800	25025599
Chr2	6774400	6775199		Chr1	25061600	25063199
Chr2	6779400	6780199		Chr1	25078800	25079999
Chr2	6784800	6785999		Chr1	25081000	25082199
Chr2	6831800	6832599		Chr1	25083800	25084399
Chr2	6907200	6909199		Chr1	25091800	25093199
Chr2	6970600	6971399		Chr1	25108600	25110599
Chr2	7068200	7068799		Chr1	25257000	25257999
Chr2	7263200	7263999		Chr1	25258400	25258999
Chr2	7281000	7281599		Chr1	25263000	25264799
Chr2	7282800	7283999		Chr1	25271000	25271799
Chr2	7287800	7288399		Chr1	25278000	25279799
Chr2	7381200	7382599		Chr1	25281600	25282199
Chr2	7473200	7474799		Chr1	25317200	25317599
Chr2	7497800	7499199		Chr1	25344600	25346199
Chr2	7584200	7585399		Chr1	25385600	25387399
Chr2	7603800	7604999		Chr1	25415200	25416199
Chr2	7627400	7628799		Chr1	25442600	25444599
Chr2	7657600	7658199		Chr1	25470600	25471199
Chr2	7740800	7741599		Chr1	25479400	25481799
Chr2	7742400	7742999		Chr1	25566200	25566799
Chr2	7789600	7790599		Chr1	25589800	25590399
Chr2	7791400	7791999		Chr1	25665800	25666799
Chr2	7823400	7823999		Chr1	25668800	25669399
Chr2	7826200	7827199		Chr1	25690000	25690599
Chr2	7930600	7931399		Chr1	25696000	25697199
Chr2	7985400	7986999		Chr1	25700200	25700799
Chr2	7991800	7992399		Chr1	25702400	25703599
Chr2	8042000	8042599		Chr1	25768400	25768799
Chr2	8064200	8065399		Chr1	25852600	25853199
Chr2	8067400	8068799		Chr1	25858800	25859799
Chr2	8099000	8099799		Chr1	25884600	25884999
Chr2	8115800	8117999		Chr1	25900400	25900999
Chr2	8119400	8119999		Chr1	25907000	25907599
Chr2	8153200	8153999		Chr1	25953800	25954399
Chr2	8158200	8159599		Chr1	25986200	25986799
Chr2	8165600	8166399		Chr1	26024800	26025599
Chr2	8262400	8263799		Chr1	26062800	26063999
Chr2	8296400	8297399		Chr1	26091600	26092199
Chr2	8346600	8347599		Chr1	26094400	26095799
Chr2	8362200	8363199		Chr1	26106600	26107399
Chr2	8497800	8498799		Chr1	26108000	26108999
Chr2	8501000	8501999		Chr1	26154400	26155399
Chr2	8513800	8514199		Chr1	26172000	26172599
Chr2	8606800	8607799		Chr1	26189400	26189999
Chr2	8627000	8627399		Chr1	26231000	26231799
Chr2	8636000	8637999		Chr1	26244400	26244999
Chr2	8645000	8645399		Chr1	26264800	26265399
Chr2	8693600	8694999		Chr1	26265800	26266599
Chr2	8695400	8696399		Chr1	26286400	26287399
Chr2	8734600	8735199		Chr1	26293200	26294799
Chr2	8756200	8757799		Chr1	26316400	26317399
Chr2	8813400	8814799		Chr1	26392200	26392799
Chr2	8883000	8884799		Chr1	26412800	26413599
Chr2	8913600	8914199		Chr1	26449200	26449999
Chr2	8932600	8933799		Chr1	26454000	26454599
Chr2	8995400	8995799		Chr1	26465200	26465999
Chr2	9036600	9037199		Chr1	26485000	26485799
Chr2	9048400	9049399		Chr1	26527400	26527999
Chr2	9390800	9393199		Chr1	26541800	26542799
Chr2	9416000	9417399		Chr1	26560800	26562199
Chr2	9426400	9427199		Chr1	26563400	26564399
Chr2	9449400	9450599		Chr1	26581200	26581599
Chr2	9486800	9487799		Chr1	26602200	26603399
Chr2	9498800	9499399		Chr1	26607200	26608599
Chr2	9564000	9565399		Chr1	26628800	26629799
Chr2	9592200	9594799		Chr1	26744800	26749399
Chr2	9612400	9613399		Chr1	26762000	26762399
Chr2	9760400	9761399		Chr1	26808000	26808999
Chr2	9810200	9811799		Chr1	26846800	26847799
Chr2	9858000	9859199		Chr1	26895000	26895999
Chr2	9897200	9897799		Chr1	26907000	26907799
Chr2	9953600	9954599		Chr1	27026200	27026799
Chr2	9968000	9968599		Chr1	27037200	27037799
Chr2	9972400	9973599		Chr1	27110400	27110799
Chr2	10046800	10047799		Chr1	27112800	27113799
Chr2	10075600	10076599		Chr1	27124800	27125399
Chr2	10078200	10078999		Chr1	27137400	27137999
Chr2	10104400	10105399		Chr1	27171000	27172799
Chr2	10148000	10148999		Chr1	27183200	27184199
Chr2	10168600	10169399		Chr1	27185600	27185999
Chr2	10178800	10179399		Chr1	27219200	27219799
Chr2	10186800	10188799		Chr1	27224600	27225199
Chr2	10197600	10199799		Chr1	27234800	27235399
Chr2	10201200	10201999		Chr1	27354400	27355399
Chr2	10296200	10297199		Chr1	27473200	27473999
Chr2	10344400	10347399		Chr1	27485400	27486199
Chr2	10418400	10420199		Chr1	27537000	27538399
Chr2	10487600	10488399		Chr1	27562200	27562999
Chr2	10548800	10549399		Chr1	27587600	27588599
Chr2	10597200	10597999		Chr1	27598000	27598599
Chr2	10635800	10636799		Chr1	27614200	27614599
Chr2	10661000	10662999		Chr1	27652600	27653599
Chr2	10696400	10696999		Chr1	27662600	27662999
Chr2	10699400	10700999		Chr1	27666200	27666599
Chr2	10701600	10702599		Chr1	27725200	27726799
Chr2	10709800	10710999		Chr1	27827000	27827599
Chr2	10713200	10713999		Chr1	27848600	27849199
Chr2	10759200	10760999		Chr1	27863200	27863799
Chr2	10795800	10796599		Chr1	27875400	27877399
Chr2	10807000	10808399		Chr1	27895800	27897799
Chr2	10817600	10818399		Chr1	27920400	27921399
Chr2	10829600	10830999		Chr1	27930000	27930599
Chr2	10897800	10898999		Chr1	27938200	27938799
Chr2	11022200	11023399		Chr1	27950400	27950999
Chr2	11138400	11139799		Chr1	27996000	27997599
Chr2	11140200	11141199		Chr1	28014400	28014999
Chr2	11157800	11159599		Chr1	28066200	28066799
Chr2	11223400	11224999		Chr1	28187800	28188199
Chr2	11233200	11234199		Chr1	28198000	28198399
Chr2	11302400	11303399		Chr1	28208200	28208999
Chr2	11375200	11375999		Chr1	28272200	28273199
Chr2	11388200	11388999		Chr1	28276200	28276799
Chr2	11405000	11406599		Chr1	28288800	28289599
Chr2	11466000	11466999		Chr1	28293600	28294399
Chr2	11498000	11500599		Chr1	28301600	28301999
Chr2	11502200	11502999		Chr1	28408600	28408999
Chr2	11533200	11534399		Chr1	28462600	28463199
Chr2	11558000	11558799		Chr1	28488800	28489399
Chr2	11568600	11569199		Chr1	28495200	28496399
Chr2	11587400	11588799		Chr1	28526000	28526999
Chr2	11604000	11605799		Chr1	28556400	28557199
Chr2	11748000	11748799		Chr1	28583200	28583999
Chr2	11779000	11779599		Chr1	28594800	28595399
Chr2	11789800	11790399		Chr1	28597600	28597999
Chr2	11799200	11799599		Chr1	28602000	28602399
Chr2	12042600	12043799		Chr1	28635200	28636399
Chr2	12088000	12088799		Chr1	28637200	28639199
Chr2	12114800	12115199		Chr1	28669600	28669999
Chr2	12156600	12157599		Chr1	28737200	28738199
Chr2	12180600	12181799		Chr1	28746200	28746599
Chr2	12200000	12200799		Chr1	28747000	28747799
Chr2	12222400	12222999		Chr1	28766600	28766999
Chr2	12226200	12226799		Chr1	28783000	28783399
Chr2	12282600	12283599		Chr1	28798200	28798999
Chr2	12303200	12303999		Chr1	28801800	28802199
Chr2	12401600	12402799		Chr1	28823600	28824199
Chr2	12473800	12474399		Chr1	28851400	28852399
Chr2	12524200	12525399		Chr1	28864400	28864799
Chr2	12529400	12530199		Chr1	28921200	28921799
Chr2	12533800	12534399		Chr1	28970600	28971799
Chr2	12564600	12565799		Chr1	29022600	29022999
Chr2	12672600	12674199		Chr1	29143000	29143999
Chr2	12684600	12687199		Chr1	29166400	29167599
Chr2	12752800	12753599		Chr1	29177800	29178399
Chr2	12762200	12762599		Chr1	29197000	29198599
Chr2	12780600	12781599		Chr1	29252200	29253199
Chr2	12818200	12819199		Chr1	29296200	29296799
Chr2	12892600	12893599		Chr1	29314000	29314399
Chr2	12904000	12904999		Chr1	29326800	29327199
Chr2	13008000	13008999		Chr1	29362800	29363999
Chr2	13070400	13071199		Chr1	29391400	29391799
Chr2	13072000	13073199		Chr1	29392200	29392999
Chr2	13084000	13084999		Chr1	29397400	29398799
Chr2	13132200	13133199		Chr1	29400600	29401799
Chr2	13166800	13167399		Chr1	29454600	29454999
Chr2	13178000	13178799		Chr1	29466800	29467399
Chr2	13190600	13191799		Chr1	29501200	29501599
Chr2	13208200	13209799		Chr1	29525000	29525399
Chr2	13277000	13277799		Chr1	29554400	29554999
Chr2	13418000	13418399		Chr1	29586000	29587599
Chr2	13423000	13423799		Chr1	29624800	29625399
Chr2	13498000	13498999		Chr1	29690200	29692399
Chr2	13604600	13605199		Chr1	29717600	29718399
Chr2	13770600	13771399		Chr1	29733800	29735199
Chr2	13822000	13823199		Chr1	29742200	29742799
Chr2	13897800	13898999		Chr1	29760800	29761799
Chr2	13931200	13932199		Chr1	29772200	29773599
Chr2	13973200	13973799		Chr1	29806200	29806999
Chr2	13985400	13985799		Chr1	29816800	29817399
Chr2	14039800	14041399		Chr1	29851400	29851799
Chr2	14047600	14048599		Chr1	29858400	29859199
Chr2	14052600	14053399		Chr1	29889600	29889999
Chr2	14059200	14059999		Chr1	29900000	29901399
Chr2	14075400	14076599		Chr1	29912400	29914399
Chr2	14085600	14086599		Chr1	30005000	30005999
Chr2	14138200	14138799		Chr1	30008200	30009199
Chr2	14167000	14167799		Chr1	30020200	30020599
Chr2	14344000	14345199		Chr1	30022200	30022599
Chr2	14358000	14358799		Chr1	30025600	30026799
Chr2	14384600	14385799		Chr1	30070000	30070799
Chr2	14427600	14428399		Chr1	30097200	30098399
Chr2	14451600	14452399		Chr1	30102600	30103599
Chr2	14489800	14490799		Chr1	30121800	30122199
Chr2	14509200	14510199		Chr1	30129000	30129399
Chr2	14604600	14606199		Chr1	30129800	30130799
Chr2	14616400	14616999		Chr1	30145600	30146799
Chr2	14674600	14675399		Chr1	30287800	30288599
Chr2	14686200	14687999		Chr1	30305200	30305999
Chr2	14782000	14782799		Chr1	30320000	30321199
Chr2	14783200	14783999		Chr1	30340200	30340999
Chr2	14791400	14791999		Chr1	30346800	30347199
Chr2	14930800	14931199		Chr1	30352600	30353399
Chr2	14950000	14950199		Chr1	30422200	30423199
Chr2	14967000	14968399		Chr1	30425600	30426599
Chr2	14977600	14978799		Chr1	30454200	30455399
Chr2	15023200	15024799		Chr1	30467800	30468399
Chr2	15135600	15136799		Chr1	30469000	30469599
Chr2	15171200	15171999		Chr1	30482800	30483799
Chr2	15374800	15375199		Chr1	30513200	30513799
Chr2	15402800	15403799		Chr1	30537000	30537799
Chr2	15420600	15421399		Chr1	30548600	30549199
Chr2	15423600	15424199		Chr1	30551800	30553199
Chr2	15425800	15426399		Chr1	30553600	30554199
Chr2	15429800	15431599		Chr1	30598000	30598599
Chr2	15526400	15528399		Chr1	30601000	30601999
Chr2	15544800	15545599		Chr1	30608400	30609199
Chr2	15571200	15571799		Chr1	30628800	30629399
Chr2	15579200	15579799		Chr1	30645000	30645399
Chr2	15604600	15605199		Chr1	30688000	30688799
Chr2	15607400	15607999		Chr1	30698400	30698799
Chr2	15621600	15623599		Chr1	30707200	30708999
Chr2	15628200	15628799		Chr1	30726600	30728599
Chr2	15629400	15629999		Chr1	30735200	30735799
Chr2	15637800	15639399		Chr1	30770000	30770799
Chr2	15701400	15703399		Chr1	30811400	30811799
Chr2	15723000	15725799		Chr1	30815800	30816399
Chr2	15892400	15892999		Chr1	30868200	30868999
Chr2	15953400	15953999		Chr1	30872400	30873199
Chr2	15954800	15956199		Chr1	30944400	30944999
Chr2	15976600	15977799		Chr1	30966800	30967999
Chr2	15987000	15988799		Chr1	30985200	30986199
Chr2	16038800	16039799		Chr1	30992200	30992799
Chr2	16159600	16160799		Chr1	31001800	31002399
Chr2	16199800	16200799		Chr1	31082200	31082999
Chr2	16211800	16212599		Chr1	31094400	31095199
Chr2	16219200	16220599		Chr1	31115400	31115999
Chr2	16248400	16249399		Chr1	31120000	31120799
Chr2	16258200	16259199		Chr1	31122400	31122799
Chr2	16363800	16364999		Chr1	31131600	31132999
Chr2	16539800	16540799		Chr1	31160600	31161199
Chr2	16559800	16560799		Chr1	31214000	31214599
Chr2	16570000	16571599		Chr1	31217800	31220799
Chr2	16662200	16662999		Chr1	31228800	31229199
Chr2	16674800	16675999		Chr1	31348400	31349199
Chr2	16688200	16688999		Chr1	31389800	31390199
Chr2	16723800	16724799		Chr1	31403800	31404799
Chr2	16775000	16776399		Chr1	31485800	31486999
Chr2	16793600	16794799		Chr1	31502800	31503999
Chr2	16843400	16845399		Chr1	31510800	31512199
Chr2	16846200	16847399		Chr1	31559400	31559799
Chr2	16863800	16864199		Chr1	31563600	31564199
Chr2	16867800	16868799		Chr1	31588400	31588999
Chr2	16968200	16969599		Chr1	31593200	31593799
Chr2	16981000	16981799		Chr1	31633800	31635399
Chr2	16989200	16989799		Chr1	31646400	31647599
Chr2	17036800	17037199		Chr1	31671400	31672199
Chr2	17062400	17063599		Chr1	31719800	31720399
Chr2	17086000	17087799		Chr1	31744000	31744599
Chr2	17107200	17108399		Chr1	31761800	31762799
Chr2	17236400	17237399		Chr1	31787800	31788199
Chr2	17241000	17242199		Chr1	31822000	31822599
Chr2	17306400	17307399		Chr1	31865600	31865799
Chr2	17391600	17392199		Chr1	31879000	31879599
Chr2	17393800	17394599		Chr1	31880000	31880399
Chr2	17407800	17409399		Chr1	31887200	31887999
Chr2	17479600	17480799		Chr1	31904800	31905399
Chr2	17484800	17485399		Chr1	31944000	31944799
Chr2	17490000	17490999		Chr1	31993200	31994799
Chr2	17510400	17511799		Chr1	32009200	32010799
Chr2	17526200	17527199		Chr1	32025800	32026799
Chr2	17567600	17567999		Chr1	32041000	32041999
Chr2	17645200	17645799		Chr1	32050000	32050599
Chr2	17723800	17725199		Chr1	32081800	32084399
Chr2	17748400	17749999		Chr1	32116200	32117399
Chr2	17786800	17787199		Chr1	32124600	32125599
Chr2	17794400	17794799		Chr1	32165200	32166399
Chr2	17816800	17818199		Chr1	32167800	32168399
Chr2	17819000	17820599		Chr1	32197000	32198599
Chr2	17857600	17858799		Chr1	32247200	32247799
Chr2	17876600	17877199		Chr1	32286800	32287799
Chr2	17908200	17908999		Chr1	32332600	32332999
Chr2	17953600	17954399		Chr1	32347000	32347399
Chr2	17991200	17992199		Chr1	32373400	32377999
Chr2	17999400	18000799		Chr1	32444800	32445599
Chr2	18002800	18004199		Chr1	32459600	32460399
Chr2	18010800	18011399		Chr1	32470200	32471399
Chr2	18040000	18040999		Chr1	32550600	32552399
Chr2	18089400	18091999		Chr1	32615400	32616799
Chr2	18126200	18126799		Chr1	32622200	32622999
Chr2	18165600	18166799		Chr1	32624000	32624599
Chr2	18245400	18245999		Chr1	32648600	32649399
Chr2	18246600	18248199		Chr1	32669400	32670399
Chr2	18300800	18302399		Chr1	32683200	32683399
Chr2	18316600	18317199		Chr1	32686600	32687999
Chr2	18356000	18356799		Chr1	32697600	32698799
Chr2	18415000	18415399		Chr1	32708800	32709799
Chr2	18434800	18435799		Chr1	32722400	32723199
Chr2	18461400	18461999		Chr1	32765400	32765999
Chr2	18463400	18464399		Chr1	32774600	32775399
Chr2	18484400	18485399		Chr1	32791400	32793199
Chr2	18517200	18518199		Chr1	32797400	32799399
Chr2	18522200	18524199		Chr1	32811200	32813399
Chr2	18528000	18528799		Chr1	32820000	32820799
Chr2	18533400	18534799		Chr1	32821400	32822799
Chr2	18600800	18601599		Chr1	32851600	32852599
Chr2	18624000	18625399		Chr1	32861000	32861999
Chr2	18650600	18651599		Chr1	32948000	32949199
Chr2	18709400	18710599		Chr1	32950400	32950999
Chr2	18711200	18712199		Chr1	32965200	32965999
Chr2	18729800	18730599		Chr1	32980200	32980599
Chr2	18731400	18732199		Chr1	32985000	32985399
Chr2	18748600	18749599		Chr1	33046200	33047399
Chr2	18757400	18757999		Chr1	33070400	33070799
Chr2	18857000	18857599		Chr1	33145000	33145599
Chr2	18894000	18895399		Chr1	33158800	33159199
Chr2	18909000	18909599		Chr1	33163000	33163799
Chr2	18917000	18918999		Chr1	33217800	33219799
Chr2	18921600	18922199		Chr1	33232400	33233399
Chr2	18959400	18960399		Chr1	33285400	33286399
Chr2	18963600	18964399		Chr1	33323000	33323399
Chr2	18978400	18979199		Chr1	33347800	33348199
Chr2	18993800	18994999		Chr1	33358600	33359199
Chr2	19020400	19020999		Chr1	33377200	33377999
Chr2	19043400	19044399		Chr1	33404400	33405599
Chr2	19046200	19047599		Chr1	33413400	33413599
Chr2	19050000	19050399		Chr1	33417200	33419199
Chr2	19061600	19062199		Chr1	33419600	33420599
Chr2	19177800	19179199		Chr1	33603600	33603999
Chr2	19195000	19196199		Chr1	33710200	33710799
Chr2	19202400	19203199		Chr1	33760200	33760799
Chr2	19221600	19222399		Chr1	33809800	33810599
Chr2	19238000	19239399		Chr1	33862000	33862799
Chr2	19335200	19337199		Chr1	33869200	33869799
Chr2	19365800	19366599		Chr1	33876600	33876999
Chr2	19401800	19402399		Chr1	33890600	33891599
Chr2	19419000	19419999		Chr1	33893800	33895199
Chr2	19432800	19433599		Chr1	33896800	33898199
Chr2	19436000	19437199		Chr1	33901200	33902399
Chr2	19442600	19443599		Chr1	33906000	33907199
Chr2	19497800	19498999		Chr1	33930400	33930799
Chr2	19525000	19527599		Chr1	33937400	33937999
Chr2	19580600	19581799		Chr1	33951200	33951999
Chr2	19607000	19607799		Chr1	33968200	33968999
Chr2	19639200	19641399		Chr1	33969600	33970799
Chr2	19888400	19889599		Chr1	34021800	34022599
Chr2	19941000	19941799		Chr1	34028400	34028999
Chr2	19959600	19960399		Chr1	34037000	34038999
Chr2	19963200	19965799		Chr1	34050000	34050999
Chr2	19983000	19983799		Chr1	34093200	34093599
Chr2	20052600	20053599		Chr1	34097000	34098199
Chr2	20086600	20087999		Chr1	34116800	34117999
Chr2	20128000	20129399		Chr1	34119400	34119799
Chr2	20130600	20131999		Chr1	34129800	34130799
Chr2	20149200	20150599		Chr1	34168800	34169199
Chr2	20174600	20175199		Chr1	34199800	34200399
Chr2	20369600	20369999		Chr1	34222200	34224799
Chr2	20378400	20379199		Chr1	34228800	34229399
Chr2	20526000	20527399		Chr1	34232400	34233999
Chr2	20628800	20629999		Chr1	34255400	34257599
Chr2	20648000	20648599		Chr1	34278400	34278799
Chr2	20668200	20669199		Chr1	34312400	34313599
Chr2	20730000	20730799		Chr1	34348000	34348799
Chr2	20757400	20758399		Chr1	34356400	34356999
Chr2	20760200	20760999		Chr1	34369200	34371399
Chr2	20798200	20799599		Chr1	34395800	34396599
Chr2	20811800	20813399		Chr1	34400600	34400999
Chr2	20856000	20857199		Chr1	34438000	34438799
Chr2	21041200	21042199		Chr1	34439200	34439999
Chr2	21094400	21095199		Chr1	34463200	34463799
Chr2	21165800	21166599		Chr1	34476200	34477399
Chr2	21178400	21179999		Chr1	34481400	34483399
Chr2	21349600	21350199		Chr1	34559600	34559999
Chr2	21387200	21388599		Chr1	34567400	34568199
Chr2	21409600	21410399		Chr1	34611400	34613199
Chr2	21424600	21425799		Chr1	34634800	34635399
Chr2	21431800	21432799		Chr1	34645600	34646799
Chr2	21444200	21446399		Chr1	34655000	34655599
Chr2	21453800	21454399		Chr1	34658600	34659799
Chr2	21463800	21465999		Chr1	34674000	34675599
Chr2	21467000	21467799		Chr1	34699600	34701199
Chr2	21475400	21475999		Chr1	34701800	34702599
Chr2	21478800	21480999		Chr1	34734600	34734999
Chr2	21492800	21493799		Chr1	34771600	34772399
Chr2	21503200	21503799		Chr1	34784800	34786599
Chr2	21512800	21513799		Chr1	34796000	34796999
Chr2	21515600	21516599		Chr1	34840600	34841399
Chr2	21523000	21523599		Chr1	34886000	34886799
Chr2	21537200	21538599		Chr1	34890800	34891399
Chr2	21559000	21560399		Chr1	34891800	34892999
Chr2	21568600	21569799		Chr1	34899200	34899599
Chr2	21575200	21575799		Chr1	34900800	34901199
Chr2	21644600	21645799		Chr1	34916800	34920199
Chr2	21752200	21753399		Chr1	34936400	34938599
Chr2	21817200	21817799		Chr1	34939000	34939799
Chr2	21877000	21877599		Chr1	34970200	34971399
Chr2	21958000	21959399		Chr1	34994800	34995799
Chr2	21972000	21972399		Chr1	35053400	35053999
Chr2	22019000	22020399		Chr1	35067200	35068399
Chr2	22055600	22056199		Chr1	35073400	35074599
Chr2	22062000	22063199		Chr1	35075400	35076799
Chr2	22076800	22077399		Chr1	35110600	35114199
Chr2	22082800	22083599		Chr1	35156000	35157399
Chr2	22166000	22166599		Chr1	35177400	35178199
Chr2	22241600	22242999		Chr1	35202000	35202799
Chr2	22245800	22246199		Chr1	35205400	35205999
Chr2	22250000	22250599		Chr1	35250600	35251199
Chr2	22314800	22316399		Chr1	35252000	35252799
Chr2	22355800	22356599		Chr1	35310000	35310599
Chr2	22393600	22394799		Chr1	35315200	35315599
Chr2	22429800	22430799		Chr1	35375400	35376599
Chr2	22455000	22455999		Chr1	35382200	35383199
Chr2	22505000	22505599		Chr1	35394000	35394999
Chr2	22527800	22528999		Chr1	35402200	35404999
Chr2	22600000	22600399		Chr1	35422600	35423399
Chr2	22603000	22604599		Chr1	35427400	35428199
Chr2	22610600	22611199		Chr1	35524000	35524599
Chr2	22637400	22638199		Chr1	35533400	35534199
Chr2	22689600	22690199		Chr1	35574200	35574599
Chr2	22739200	22739599		Chr1	35589400	35589799
Chr2	22745200	22746199		Chr1	35619400	35620599
Chr2	22788400	22789199		Chr1	35635800	35636999
Chr2	22835600	22836999		Chr1	35709400	35710599
Chr2	22861000	22861999		Chr1	35729600	35730599
Chr2	22866000	22867999		Chr1	35758000	35758799
Chr2	22875200	22876599		Chr1	35780400	35782399
Chr2	22880800	22882399		Chr1	35928800	35929399
Chr2	22896800	22897399		Chr1	35951600	35952399
Chr2	23000600	23002199		Chr1	35953600	35954199
Chr2	23050400	23050799		Chr1	36030200	36032199
Chr2	23113600	23114199		Chr1	36066800	36067199
Chr2	23185400	23186399		Chr1	36111200	36111599
Chr2	23190400	23191799		Chr1	36112800	36113199
Chr2	23230400	23231199		Chr1	36134800	36135199
Chr2	23260000	23261599		Chr1	36147200	36147799
Chr2	23267000	23268399		Chr1	36150400	36150799
Chr2	23303000	23304599		Chr1	36161600	36162399
Chr2	23398600	23399999		Chr1	36191200	36191799
Chr2	23413400	23414599		Chr1	36214200	36215199
Chr2	23437600	23438199		Chr1	36277600	36277999
Chr2	23527600	23528999		Chr1	36307000	36308199
Chr2	23543600	23545399		Chr1	36309600	36310199
Chr2	23548800	23549999		Chr1	36393000	36394199
Chr2	23779800	23781399		Chr1	36430800	36431399
Chr2	23804600	23804999		Chr1	36478000	36479199
Chr2	23825600	23826399		Chr1	36491200	36492599
Chr2	23850000	23850999		Chr1	36506400	36506799
Chr2	23994600	23995999		Chr1	36527800	36528599
Chr2	24009600	24010199		Chr1	36599800	36600599
Chr2	24012400	24013799		Chr1	36625800	36627599
Chr2	24087600	24088399		Chr1	36675800	36676399
Chr2	24102200	24102799		Chr1	36691200	36691999
Chr2	24148200	24149399		Chr1	36694600	36695399
Chr2	24149800	24150599		Chr1	36699200	36699599
Chr2	24177000	24178799		Chr1	36732600	36734199
Chr2	24188000	24188999		Chr1	36770800	36771999
Chr2	24236600	24237199		Chr1	36784000	36785199
Chr2	24247600	24249399		Chr1	36838000	36839199
Chr2	24705400	24705999		Chr1	36865400	36866999
Chr2	24820400	24820999		Chr1	36875400	36875999
Chr2	24879800	24880599		Chr1	36961200	36962199
Chr2	24936000	24936599		Chr1	36966600	36968399
Chr2	25152600	25153399		Chr1	36981000	36981599
Chr2	25164200	25165599		Chr1	37003400	37003799
Chr2	25207000	25207399		Chr1	37064800	37065399
Chr2	25235400	25236199		Chr1	37089800	37090599
Chr2	25239400	25240599		Chr1	37093400	37093999
Chr2	25242600	25243199		Chr1	37137000	37138199
Chr2	25255000	25255599		Chr1	37143600	37144599
Chr2	25288600	25289399		Chr1	37158000	37159599
Chr2	25314800	25316199		Chr1	37347000	37347599
Chr2	25333200	25334599		Chr1	37355400	37356199
Chr2	25402400	25403199		Chr1	37428000	37430399
Chr2	25534200	25535399		Chr1	37432000	37437199
Chr2	25617600	25618199		Chr1	37472400	37473799
Chr2	25752000	25752999		Chr1	37478200	37478799
Chr2	25798800	25799599		Chr1	37514200	37515599
Chr2	25811600	25812999		Chr1	37562400	37563799
Chr2	25824200	25825599		Chr1	37580600	37581199
Chr2	25852600	25853199		Chr1	37617200	37617599
Chr2	25874200	25874999		Chr1	37779200	37779999
Chr2	26011400	26011999		Chr1	37845400	37845999
Chr2	26013000	26013799		Chr1	37860800	37862199
Chr2	26015400	26017199		Chr1	37929200	37929799
Chr2	26057200	26057799		Chr1	37985000	37985599
Chr2	26059600	26060399		Chr1	37994200	37995599
Chr2	26073400	26074199		Chr1	38015400	38016799
Chr2	26121200	26121999		Chr1	38043400	38043999
Chr2	26131400	26132199		Chr1	38075200	38075799
Chr2	26175600	26176399		Chr1	38123000	38123799
Chr2	26211000	26211999		Chr1	38132200	38132599
Chr2	26213800	26214599		Chr1	38147000	38147799
Chr2	26256200	26257399		Chr1	38151400	38151999
Chr2	26302800	26303399		Chr1	38209400	38211799
Chr2	26457800	26458999		Chr1	38237600	38237799
Chr2	26630200	26630799		Chr1	38254400	38255599
Chr2	26632200	26633199		Chr1	38265200	38265799
Chr2	26681600	26683599		Chr1	38336000	38336599
Chr2	26767200	26768199		Chr1	38339800	38340399
Chr2	26785800	26786599		Chr1	38390200	38391799
Chr2	26865000	26865799		Chr1	38397600	38398799
Chr2	26870200	26870999		Chr1	38450000	38451199
Chr2	27024200	27025599		Chr1	38474600	38475199
Chr2	27044000	27045999		Chr1	38509200	38510199
Chr2	27124200	27124599		Chr1	38541200	38542399
Chr2	27149000	27150399		Chr1	38552600	38554199
Chr2	27172600	27173199		Chr1	38579000	38580599
Chr2	27187800	27188799		Chr1	38621200	38622599
Chr2	27189600	27191799		Chr1	38627600	38628799
Chr2	27196000	27196599		Chr1	38664600	38665199
Chr2	27211400	27212199		Chr1	38715800	38716399
Chr2	27230000	27231799		Chr1	38751400	38752999
Chr2	27269400	27271199		Chr1	38772000	38772399
Chr2	27273200	27274999		Chr1	38773800	38775199
Chr2	27325000	27325799		Chr1	38778600	38779199
Chr2	27332000	27333999		Chr1	38784600	38785999
Chr2	27348800	27350199		Chr1	38809800	38810599
Chr2	27355600	27357199		Chr1	38818600	38819399
Chr2	27358000	27358799		Chr1	38860000	38861599
Chr2	27373600	27374599		Chr1	38864000	38864599
Chr2	27421400	27421999		Chr1	38920600	38921799
Chr2	27437400	27438199		Chr1	38928800	38929799
Chr2	27457800	27459199		Chr1	38951600	38952399
Chr2	27490600	27491199		Chr1	39017400	39018199
Chr2	27657000	27657599		Chr1	39120600	39120999
Chr2	27663200	27663799		Chr1	39123200	39124399
Chr2	27670000	27670599		Chr1	39137600	39138399
Chr2	27737200	27737999		Chr1	39154800	39155399
Chr2	27764600	27765599		Chr1	39171800	39172199
Chr2	27782800	27783399		Chr1	39207800	39208399
Chr2	27832400	27833199		Chr1	39223600	39226199
Chr2	27864000	27864999		Chr1	39269000	39269599
Chr2	27903200	27903799		Chr1	39270800	39271399
Chr2	28038000	28039599		Chr1	39302800	39303799
Chr2	28110400	28110999		Chr1	39322800	39323799
Chr2	28115200	28116399		Chr1	39341600	39342399
Chr2	28126000	28126999		Chr1	39354800	39355199
Chr2	28171200	28172199		Chr1	39379000	39379599
Chr2	28175200	28176199		Chr1	39380600	39380999
Chr2	28222600	28223399		Chr1	39381800	39382799
Chr2	28237000	28237999		Chr1	39387400	39388199
Chr2	28268600	28269999		Chr1	39389400	39390199
Chr2	28293000	28294399		Chr1	39402200	39402999
Chr2	28364000	28364199		Chr1	39417800	39419199
Chr2	28475800	28477399		Chr1	39431800	39432199
Chr2	28530000	28530599		Chr1	39473400	39473799
Chr2	28652600	28652999		Chr1	39480400	39481599
Chr2	28664200	28666199		Chr1	39500800	39501999
Chr2	28735200	28735999		Chr1	39525600	39526199
Chr2	28739200	28740399		Chr1	39531400	39532199
Chr2	28824200	28824599		Chr1	39608200	39609999
Chr2	28858200	28859399		Chr1	39627200	39628599
Chr2	28950200	28950999		Chr1	39629000	39629799
Chr2	28955200	28956599		Chr1	39630400	39632599
Chr2	28981200	28981999		Chr1	39678800	39679199
Chr2	28999800	29000799		Chr1	39683000	39683799
Chr2	29070000	29070599		Chr1	39761400	39762599
Chr2	29089600	29090399		Chr1	39773400	39773799
Chr2	29101800	29102599		Chr1	39817600	39820399
Chr2	29131600	29131999		Chr1	39839400	39840399
Chr2	29140000	29141399		Chr1	39842600	39843199
Chr2	29166600	29167399		Chr1	39854200	39854799
Chr2	29203200	29204199		Chr1	39870600	39871199
Chr2	29253400	29254199		Chr1	39891000	39892399
Chr2	29255200	29255799		Chr1	39897000	39897799
Chr2	29276800	29277599		Chr1	39912600	39913799
Chr2	29286200	29287399		Chr1	39923000	39924199
Chr2	29315400	29316199		Chr1	39958400	39958999
Chr2	29347800	29349199		Chr1	39962800	39963399
Chr2	29384000	29384999		Chr1	40014800	40015199
Chr2	29427800	29429199		Chr1	40016600	40017599
Chr2	29472800	29474199		Chr1	40073600	40075199
Chr2	29483800	29484399		Chr1	40098000	40099199
Chr2	29491600	29492599		Chr1	40118000	40118399
Chr2	29512600	29514199		Chr1	40142000	40143199
Chr2	29556000	29557599		Chr1	40200000	40200399
Chr2	29565600	29566399		Chr1	40203000	40203599
Chr2	29598200	29598999		Chr1	40298800	40300199
Chr2	29636400	29638599		Chr1	40305400	40306199
Chr2	29662800	29663399		Chr1	40367200	40368199
Chr2	29671400	29675599		Chr1	40370000	40370599
Chr2	29678600	29679799		Chr1	40408800	40409599
Chr2	29689800	29690599		Chr1	40414000	40414599
Chr2	29811600	29812399		Chr1	40460000	40460799
Chr2	29822200	29823399		Chr1	40517200	40517799
Chr2	29835800	29836599		Chr1	40546000	40546599
Chr2	29877400	29877999		Chr1	40551800	40552399
Chr2	29878400	29878799		Chr1	40607400	40608199
Chr2	29987800	29988599		Chr1	40626600	40627199
Chr2	30049600	30050999		Chr1	40777600	40778599
Chr2	30056600	30057199		Chr1	40839600	40840599
Chr2	30114800	30115799		Chr1	40892400	40893999
Chr2	30141600	30142999		Chr1	40945000	40945599
Chr2	30211400	30212599		Chr1	40948800	40949599
Chr2	30222200	30223599		Chr1	40982000	40983599
Chr2	30232800	30234199		Chr1	41001600	41003599
Chr2	30291600	30292799		Chr1	41045800	41046399
Chr2	30311800	30312999		Chr1	41057200	41057799
Chr2	30386200	30387399		Chr1	41058200	41058999
Chr2	30397800	30399199		Chr1	41059400	41059999
Chr2	30402000	30404199		Chr1	41064800	41065999
Chr2	30411600	30412599		Chr1	41095800	41096999
Chr2	30428200	30428999		Chr1	41106400	41107599
Chr2	30511200	30511999		Chr1	41113600	41114599
Chr2	30618400	30619199		Chr1	41155600	41156599
Chr2	30670200	30670799		Chr1	41173800	41174399
Chr2	30672400	30673599		Chr1	41181800	41182199
Chr2	30770600	30771599		Chr1	41188000	41188599
Chr2	30773600	30774199		Chr1	41245400	41246799
Chr2	30794600	30795599		Chr1	41251000	41251599
Chr2	30811000	30811999		Chr1	41272400	41273199
Chr2	30825000	30826799		Chr1	41273600	41274199
Chr2	30897800	30898999		Chr1	41299600	41301999
Chr2	30972200	30972999		Chr1	41335200	41336199
Chr2	31055800	31056199		Chr1	41370800	41371199
Chr2	31062000	31063399		Chr1	41378400	41379399
Chr2	31133600	31134599		Chr1	41381600	41382199
Chr2	31136400	31137399		Chr1	41389600	41390199
Chr2	31165200	31168599		Chr1	41493800	41494399
Chr2	31182800	31184199		Chr1	41495400	41495999
Chr2	31290800	31291799		Chr1	41555400	41557399
Chr2	31300400	31301399		Chr1	41658000	41658799
Chr2	31363200	31364799		Chr1	41761200	41761999
Chr2	31371800	31376199		Chr1	41977200	41977999
Chr2	31396400	31397199		Chr1	42061800	42062199
Chr2	31541000	31542999		Chr1	42067000	42067799
Chr2	31581600	31582799		Chr1	42074400	42075399
Chr2	31622800	31623599		Chr1	42076600	42077799
Chr2	31649800	31650399		Chr1	42084600	42085799
Chr2	31677400	31678399		Chr1	42094800	42095599
Chr2	31712400	31713399		Chr1	42125800	42127599
Chr2	31763200	31764399		Chr1	42216400	42218199
Chr2	31974000	31975599		Chr1	42247800	42247999
Chr2	31982000	31983199		Chr1	42254200	42255199
Chr2	31987200	31988199		Chr1	42256000	42256599
Chr2	32006800	32007399		Chr1	42281400	42281999
Chr2	32036400	32037599		Chr1	42310800	42311599
Chr2	32074400	32074599		Chr1	42325600	42326799
Chr2	32106200	32107999		Chr1	42348400	42349399
Chr2	32199600	32200599		Chr1	42460400	42460799
Chr2	32251400	32252199		Chr1	42477000	42477999
Chr2	32268600	32269799		Chr1	42595800	42597999
Chr2	32648800	32649999		Chr1	42598600	42599399
Chr2	32650800	32652799		Chr1	42614000	42615599
Chr2	32668000	32669199		Chr1	42631400	42632799
Chr2	32677600	32678399		Chr1	42684800	42686599
Chr2	32692400	32693199		Chr1	42710200	42711999
Chr2	32696000	32696799		Chr1	42727200	42728199
Chr2	32774000	32775199		Chr1	42740800	42742199
Chr2	32782200	32782799		Chr1	42831200	42832599
Chr2	32834800	32835999		Chr1	42847200	42847799
Chr2	32858200	32858999		Chr1	42851200	42852199
Chr2	32934600	32935599		Chr1	42858400	42859199
Chr2	32938800	32940399		Chr1	42916000	42916599
Chr2	32957600	32958199		Chr1	42917200	42919599
Chr2	32966400	32967399		Chr1	42954200	42954399
Chr2	33054400	33054799		Chr1	42970400	42970999
Chr2	33090600	33092199		Chr1	43058000	43058999
Chr2	33154800	33155999		Chr1	43095400	43095799
Chr2	33239800	33240399		Chr1	43125000	43126199
Chr2	33369400	33370799		Chr1	43183000	43183399
Chr2	33391600	33392399		Chr1	43194000	43195399
Chr2	33398200	33399599		Chr1	43248000	43248599
Chr2	33419000	33420399		Chr2	200	799
Chr2	33514800	33516199		Chr2	8600	8999
Chr2	33589800	33590599		Chr2	24400	25799
Chr2	33591400	33591799		Chr2	27600	28799
Chr2	33593000	33594799		Chr2	37200	37599
Chr2	33615600	33617399		Chr2	44200	44799
Chr2	33629200	33630199		Chr2	48600	49199
Chr2	33686400	33687799		Chr2	55000	55799
Chr2	33734400	33736199		Chr2	66800	67199
Chr2	33775000	33775799		Chr2	82600	82999
Chr2	33791400	33793999		Chr2	95800	96599
Chr2	33895600	33896599		Chr2	132800	133599
Chr2	33898000	33899199		Chr2	163200	164399
Chr2	33993800	33994799		Chr2	174400	174799
Chr2	34032200	34033599		Chr2	182800	183399
Chr2	34045800	34046799		Chr2	195800	196999
Chr2	34195200	34195999		Chr2	211800	212199
Chr2	34283000	34283799		Chr2	287600	288199
Chr2	34295000	34295999		Chr2	300000	300999
Chr2	34341400	34342199		Chr2	303600	304399
Chr2	34408000	34408599		Chr2	309600	310799
Chr2	34412600	34413199		Chr2	312200	313399
Chr2	34416400	34417799		Chr2	315600	316599
Chr2	34434200	34434799		Chr2	318400	319199
Chr2	34439800	34440999		Chr2	332000	332799
Chr2	34442800	34443599		Chr2	343000	343599
Chr2	34444200	34445799		Chr2	430000	430799
Chr2	34487200	34488599		Chr2	438200	438999
Chr2	34545400	34546399		Chr2	512600	513399
Chr2	34573800	34574599		Chr2	517000	517599
Chr2	34601600	34602799		Chr2	572200	572999
Chr2	34613400	34614599		Chr2	573600	574199
Chr2	34615000	34616199		Chr2	575200	577799
Chr2	34638200	34639199		Chr2	595000	595999
Chr2	34682400	34683199		Chr2	610800	611599
Chr2	34696400	34697599		Chr2	629400	629999
Chr2	34699000	34700599		Chr2	647400	648599
Chr2	34862200	34862799		Chr2	650400	651399
Chr2	34866400	34867999		Chr2	678800	679399
Chr2	34996000	34996599		Chr2	699800	700399
Chr2	34999800	35000999		Chr2	711400	711599
Chr2	35091400	35092199		Chr2	712400	712999
Chr2	35123600	35124599		Chr2	774600	775199
Chr2	35127800	35128599		Chr2	825800	827999
Chr2	35138200	35139799		Chr2	842400	842999
Chr2	35229800	35230599		Chr2	846000	846399
Chr2	35257200	35257999		Chr2	854000	854999
Chr2	35272000	35273999		Chr2	858000	859199
Chr2	35313000	35313999		Chr2	906600	907199
Chr2	35345200	35345999		Chr2	1023800	1024599
Chr2	35361200	35362399		Chr2	1048400	1049999
Chr2	35391600	35392999		Chr2	1115400	1115799
Chr2	35396200	35397199		Chr2	1116400	1117199
Chr2	35400200	35400999		Chr2	1134000	1135199
Chr2	35408400	35409399		Chr2	1146600	1147799
Chr2	35415200	35418599		Chr2	1150600	1150999
Chr2	35419200	35419799		Chr2	1207200	1208399
Chr2	35461200	35462399		Chr2	1240600	1242199
Chr2	35479600	35480799		Chr2	1249000	1250199
Chr2	35512600	35513799		Chr2	1343200	1345599
Chr2	35551200	35552799		Chr2	1373800	1374399
Chr2	35568000	35569199		Chr2	1378800	1380199
Chr2	35576800	35578399		Chr2	1387800	1388599
Chr2	35607800	35608599		Chr2	1453400	1453999
Chr2	35625200	35625799		Chr2	1457000	1457599
Chr2	35632600	35633399		Chr2	1470800	1471999
Chr2	35633800	35635199		Chr2	1479600	1480599
Chr2	35645400	35646199		Chr2	1484600	1485399
Chr2	35666200	35668599		Chr2	1540800	1541599
Chr2	35670000	35671199		Chr2	1621600	1622599
Chr2	35680600	35681399		Chr2	1637600	1637999
Chr2	35692400	35693599		Chr2	1652000	1652599
Chr2	35729400	35730199		Chr2	1676000	1676799
Chr2	35756600	35757399		Chr2	1702600	1703599
Chr2	35761000	35761999		Chr2	1743200	1744199
Chr2	35784200	35785799		Chr2	1784400	1785399
Chr2	35786600	35787599		Chr2	1787400	1788199
Chr2	35790800	35792599		Chr2	1788600	1789599
Chr2	35806200	35806999		Chr2	1847800	1848599
Chr2	35839800	35840599		Chr2	1906000	1906599
Chr2	35842400	35842999		Chr2	1923400	1923799
Chr2	35857000	35858799		Chr2	1964400	1964999
Chr2	35860200	35860999		Chr2	1980000	1981199
Chr2	35873400	35874599		Chr2	1985600	1986599
Chr2	35894000	35894599		Chr2	2047800	2048399
Chr2	35899400	35899799		Chr2	2058600	2059399
Chr3	25000	26199		Chr2	2059800	2060199
Chr3	102600	104599		Chr2	2092400	2092799
Chr3	116000	117199		Chr2	2144000	2145199
Chr3	118000	118999		Chr2	2193200	2193799
Chr3	122000	122599		Chr2	2218000	2218399
Chr3	145200	146599		Chr2	2238200	2239599
Chr3	152000	152399		Chr2	2249800	2250399
Chr3	173800	174399		Chr2	2324000	2324599
Chr3	208800	209799		Chr2	2408800	2409399
Chr3	312800	313799		Chr2	2430800	2431799
Chr3	347800	348799		Chr2	2489400	2489799
Chr3	353200	353599		Chr2	2493400	2493999
Chr3	357600	358999		Chr2	2499000	2499399
Chr3	390000	390799		Chr2	2533000	2533799
Chr3	461400	462799		Chr2	2539200	2539999
Chr3	465000	465599		Chr2	2620200	2620999
Chr3	512200	513399		Chr2	2645800	2646999
Chr3	547600	548399		Chr2	2648600	2650199
Chr3	550800	552799		Chr2	2689600	2690199
Chr3	622000	622799		Chr2	2698200	2699599
Chr3	627400	628199		Chr2	2744000	2744999
Chr3	656400	656999		Chr2	2749400	2750199
Chr3	675800	676799		Chr2	2806400	2807399
Chr3	722400	723799		Chr2	2812200	2812999
Chr3	756000	757399		Chr2	2824800	2825199
Chr3	840400	841399		Chr2	2829400	2830799
Chr3	882200	883199		Chr2	2881200	2882399
Chr3	889200	890199		Chr2	2906800	2907399
Chr3	928000	928799		Chr2	2919000	2919999
Chr3	930400	930999		Chr2	2921600	2922599
Chr3	932800	933599		Chr2	2927200	2928399
Chr3	950800	951799		Chr2	2934600	2935199
Chr3	1051800	1052399		Chr2	2964600	2965599
Chr3	1133600	1134399		Chr2	2981400	2982199
Chr3	1152400	1153199		Chr2	3060600	3060999
Chr3	1168600	1169399		Chr2	3086600	3087799
Chr3	1291200	1292199		Chr2	3088600	3089399
Chr3	1350200	1351199		Chr2	3098800	3099399
Chr3	1449600	1449999		Chr2	3125800	3126599
Chr3	1677000	1678599		Chr2	3130600	3131399
Chr3	1752800	1753799		Chr2	3215400	3216399
Chr3	1765800	1767599		Chr2	3251200	3251799
Chr3	1776600	1777399		Chr2	3264200	3264799
Chr3	1790800	1793199		Chr2	3330200	3331199
Chr3	1794000	1795199		Chr2	3336600	3337199
Chr3	1803800	1805999		Chr2	3338600	3339199
Chr3	1922200	1923599		Chr2	3340400	3342199
Chr3	2018800	2020399		Chr2	3346800	3348199
Chr3	2042800	2043599		Chr2	3359800	3360799
Chr3	2044400	2045599		Chr2	3400400	3401999
Chr3	2056200	2057799		Chr2	3490600	3491399
Chr3	2110000	2111199		Chr2	3499800	3500399
Chr3	2120800	2123799		Chr2	3504000	3504799
Chr3	2218200	2218999		Chr2	3517000	3518399
Chr3	2222400	2223399		Chr2	3621600	3622799
Chr3	2265400	2266599		Chr2	3628400	3629599
Chr3	2297600	2298399		Chr2	3634200	3635199
Chr3	2464400	2465599		Chr2	3653600	3653999
Chr3	2480600	2481599		Chr2	3669000	3670999
Chr3	2557600	2559399		Chr2	3747400	3747999
Chr3	2618400	2619199		Chr2	3754800	3755599
Chr3	2647000	2647799		Chr2	3772000	3772799
Chr3	2813600	2814399		Chr2	3831600	3832399
Chr3	2834800	2835999		Chr2	3840400	3841199
Chr3	2874800	2875799		Chr2	3862800	3863799
Chr3	2877800	2878799		Chr2	3864400	3864999
Chr3	2928000	2928799		Chr2	3910400	3910799
Chr3	2978000	2978999		Chr2	3947400	3947999
Chr3	3116800	3117799		Chr2	3999200	3999999
Chr3	3121800	3122599		Chr2	4024600	4025399
Chr3	3127400	3129199		Chr2	4083000	4083999
Chr3	3133200	3134399		Chr2	4088400	4088999
Chr3	3156200	3156599		Chr2	4140000	4140799
Chr3	3160000	3160799		Chr2	4173800	4174799
Chr3	3210400	3211599		Chr2	4185600	4186999
Chr3	3236800	3239199		Chr2	4190400	4190999
Chr3	3243600	3244799		Chr2	4214200	4214999
Chr3	3257200	3257999		Chr2	4234800	4235199
Chr3	3259800	3261199		Chr2	4268400	4268799
Chr3	3264800	3265999		Chr2	4309600	4310199
Chr3	3344000	3345199		Chr2	4350800	4351599
Chr3	3363600	3365399		Chr2	4361400	4362399
Chr3	3435800	3436599		Chr2	4438200	4438799
Chr3	3469200	3472599		Chr2	4531600	4531999
Chr3	3502600	3503999		Chr2	4542600	4542999
Chr3	3562400	3562999		Chr2	4617200	4617999
Chr3	3634400	3634999		Chr2	4633800	4634199
Chr3	3648000	3648999		Chr2	4667400	4669199
Chr3	3738600	3740399		Chr2	4688800	4689199
Chr3	3756000	3757799		Chr2	4693000	4693399
Chr3	3765000	3766199		Chr2	4708400	4709399
Chr3	3777800	3779399		Chr2	4738800	4739399
Chr3	3796600	3797999		Chr2	4786800	4787199
Chr3	3829600	3830599		Chr2	4831400	4831799
Chr3	3833000	3834199		Chr2	4864000	4864399
Chr3	3866200	3866799		Chr2	4878600	4879599
Chr3	3994400	3995199		Chr2	4882000	4882799
Chr3	4195000	4195799		Chr2	4906800	4907399
Chr3	4203400	4204399		Chr2	4913000	4913599
Chr3	4220600	4221399		Chr2	4985000	4985999
Chr3	4286000	4286599		Chr2	4987000	4987999
Chr3	4413200	4414399		Chr2	4997400	4997799
Chr3	4416600	4417799		Chr2	5015600	5016399
Chr3	4474000	4475399		Chr2	5042400	5043799
Chr3	4487000	4487799		Chr2	5054200	5056199
Chr3	4497000	4498399		Chr2	5087800	5088999
Chr3	4552800	4554999		Chr2	5101800	5102399
Chr3	4555600	4556399		Chr2	5128200	5128799
Chr3	4593000	4593799		Chr2	5134800	5136999
Chr3	4609800	4610399		Chr2	5137400	5137999
Chr3	4619000	4619999		Chr2	5248600	5248999
Chr3	4748400	4748999		Chr2	5257000	5257999
Chr3	4847200	4848199		Chr2	5270400	5270799
Chr3	4883000	4883599		Chr2	5298400	5299199
Chr3	4952800	4953199		Chr2	5347000	5347799
Chr3	5067800	5068999		Chr2	5357200	5357599
Chr3	5101000	5102199		Chr2	5429400	5431799
Chr3	5118000	5119799		Chr2	5435600	5436199
Chr3	5123200	5124199		Chr2	5436600	5438599
Chr3	5147000	5147799		Chr2	5524000	5524999
Chr3	5159400	5160199		Chr2	5566000	5568199
Chr3	5192400	5193399		Chr2	5583600	5584399
Chr3	5200200	5200999		Chr2	5592200	5592599
Chr3	5282600	5283199		Chr2	5599200	5600799
Chr3	5350800	5351599		Chr2	5681400	5681799
Chr3	5381600	5382599		Chr2	5698000	5698199
Chr3	5394800	5395399		Chr2	5743600	5744599
Chr3	5456400	5457399		Chr2	5768000	5769199
[truncated: 14,856 more rows]
