# Supplementary material for: The Global Changes of N6-methyldeoxyadenosine in Response to Low Temperature in Arabidopsis thaliana and Rice
Source: Plants (Basel). 2023 Jun 19;12(12):2373. doi: 10.3390/plants12122373 (PMC10305114; doi:10.3390/plants12122373)
Supplement: Supplementary file 1 [file plants-12-02373-s001.zip › Table S4.xlsx]

## Sheet: Sheet1
		Table S4. Identification of DMPs and DMGs upon cold treatment in Arabidopsis.
DMRs												DMGs
Chr	start	end	CK_1	CK_2	Cold_1	Cold_2	Input	Fold_change	FDR	status		Gene	Chr	start	end
Chr1	10349200	10349399	346	403	176	196	94	-0.468727	0.0102407	down		AT1G29630	Chr1	10349200	10349399
Chr1	11383600	11384399	946	1165	464	510	395	-0.571498	0.000128805	down		AT1G53345	Chr1	19901600	19901999
Chr1	11625400	11625599	319	392	186	184	153	-0.399702	0.0282599	down		AT1G54090	Chr1	20188800	20189399
Chr1	11806400	11806799	682	810	217	188	201	-1.34262	3.4202e-19	down		AT1G58270	Chr1	21614800	21615199
Chr1	12381200	12381999	2193	2777	1257	1119	578	-0.521829	7.65484e-05	down		AT1G59740	Chr1	21967400	21967799
Chr1	12600800	12601999	1748	2223	1124	1009	812	-0.353265	0.0125522	down		AT1G65960	Chr1	24552400	24552799
Chr1	12845600	12845999	642	875	267	282	210	-0.916086	9.9206e-10	down		AT1G69252	Chr1	26036000	26036799
Chr1	12917400	12918199	1029	1219	657	567	503	-0.339308	0.0278961	down		AT1G70060	Chr1	26382400	26382999
Chr1	13437600	13438799	2011	2443	844	885	766	-0.822408	4.04065e-10	down		AT1G11790	Chr1	3980000	3980599
Chr1	13623600	13624199	784	916	462	442	400	-0.372447	0.0167391	down		AT1G13710	Chr1	4704600	4704999
Chr1	13659800	13660399	821	950	499	482	255	-0.314082	0.0483595	down		AT1G16530	Chr1	5653000	5653399
Chr1	13706600	13706999	831	901	490	417	280	-0.401748	0.014667	down		AT1G27880	Chr1	9707600	9708399
Chr1	13717800	13718399	931	1094	334	394	336	-0.933831	9.0589e-10	down		AT2G23590	Chr2	10036200	10036599
Chr1	13772000	13772799	2196	2739	1475	1267	567	-0.306785	0.0355277	down		AT2G30370	Chr2	12941800	12942599
Chr1	13979000	13979599	1373	1731	730	712	375	-0.561871	3.13458e-05	down		AT2G39880	Chr2	16648600	16649199
Chr1	14033600	14034199	879	1217	383	412	303	-0.846427	7.29297e-09	down		AT2G14560	Chr2	6212800	6213199
Chr1	14129200	14129599	445	635	237	270	242	-0.53698	0.00199811	down		AT2G16770	Chr2	7278000	7278999
Chr1	14134800	14135599	1048	1311	641	636	454	-0.341515	0.0223469	down		AT3G28270	Chr3	10537600	10538199
Chr1	14923400	14923999	1532	1929	978	842	356	-0.385375	0.00758347	down		AT3G28860	Chr3	10877200	10877799
Chr1	15058400	15060199	3828	4790	2025	2037	1015	-0.54082	2.49042e-05	down		AT3G29760	Chr3	11590400	11590999
Chr1	16010200	16011599	4340	5440	2445	2368	897	-0.479167	0.00016916	down		AT3G05152	Chr3	1444400	1444999
Chr1	16176200	16176799	935	1178	563	557	348	-0.371474	0.0130758	down		AT3G44020	Chr3	15800200	15800999
Chr1	16292200	16292999	1364	1580	681	681	473	-0.573567	3.99146e-05	down		AT3G44735	Chr3	16292600	16292999
Chr1	16359000	16359399	687	890	437	416	233	-0.341079	0.0303644	down		AT3G50760	Chr3	18868400	18869399
Chr1	16419400	16420399	1668	1929	871	805	602	-0.564877	3.3345e-05	down		AT3G55110	Chr3	20427000	20427799
Chr1	16465200	16465799	645	850	334	330	345	-0.623787	2.85739e-05	down		AT3G61890	Chr3	22915800	22916199
Chr1	16493600	16494199	813	1003	245	238	265	-1.36819	9.01213e-22	down		AT3G11964	Chr3	3803600	3803999
Chr1	16711800	16712399	1128	1421	501	492	334	-0.815885	1.18889e-09	down		AT3G18490	Chr3	6350200	6350799
Chr1	16739400	16739799	862	1098	508	438	266	-0.508069	0.000551395	down		AT3G24530	Chr3	8947800	8948199
Chr1	17007400	17007999	1679	2059	850	755	440	-0.679169	2.30709e-07	down		AT3G25710	Chr3	9371000	9371599
Chr1	17094600	17095599	719	1023	446	481	417	-0.356049	0.034365	down		AT4G22470	Chr4	11840800	11841599
Chr1	17511800	17512399	756	977	325	368	321	-0.774342	2.97677e-07	down		AT4G22485	Chr4	11844600	11846399
Chr1	17714000	17714999	1048	1380	701	578	450	-0.380368	0.0140672	down		AT4G22560	Chr4	11880600	11880999
Chr1	17873000	17873599	800	1028	360	363	350	-0.792365	2.26424e-08	down		AT4G23020	Chr4	12068400	12068999
Chr1	17882600	17883199	980	1297	614	540	282	-0.434666	0.00326363	down		AT4G27430	Chr4	13722800	13723599
Chr1	18425400	18425799	515	624	303	264	230	-0.466335	0.00400773	down		AT4G35130	Chr4	16724000	16724599
Chr1	18486200	18487199	1327	1730	717	736	578	-0.525571	0.000173007	down		AT4G05530	Chr4	2815200	2815999
Chr1	18991800	18992599	1210	1537	724	731	499	-0.371516	0.0112116	down		AT4G10360	Chr4	6419600	6419999
Chr1	19280800	19281999	1523	1894	970	899	787	-0.328161	0.0222044	down		AT4G13840	Chr4	8016400	8016999
Chr1	19700400	19700999	789	1037	460	491	309	-0.392764	0.01278	down		AT5G03850	Chr5	1029600	1030399
Chr1	19901600	19901999	595	667	236	239	201	-0.872814	1.63091e-08	down		AT5G36880	Chr5	14539400	14540399
Chr1	20005800	20006399	671	803	342	301	394	-0.657664	1.01116e-05	down		AT5G48600	Chr5	19702200	19702599
Chr1	20033200	20033599	817	1135	407	361	171	-0.796453	3.48853e-08	down		AT5G54440	Chr5	22107600	22107999
Chr1	20188800	20189399	1042	1319	490	502	336	-0.705789	3.46408e-07	down		AT5G55660	Chr5	22537600	22538999
Chr1	20914800	20915199	543	708	311	303	211	-0.480672	0.00228641	down		AT5G57070	Chr5	23095600	23096199
Chr1	21134400	21134799	536	621	262	225	227	-0.711365	5.9417e-06	down		AT5G65420	Chr5	26143800	26144199
Chr1	21614800	21615199	622	769	250	233	194	-0.983882	2.23227e-11	down		AT5G11540	Chr5	3704600	3705199
Chr1	21967400	21967799	566	675	329	337	271	-0.356705	0.0313544	down		AT5G03040	Chr5	712800	713399
Chr1	22166400	22167199	958	1133	525	542	409	-0.430007	0.0043931	down		AT5G22740	Chr5	7558200	7558999
Chr1	22994800	22995399	1160	1448	782	654	418	-0.320092	0.0384663	down		AT5G23730	Chr5	8006000	8006599
Chr1	23114200	23115599	3417	4014	2236	1935	1056	-0.296696	0.0420271	down		AT5G25620	Chr5	8938200	8938999
Chr1	23238000	23238599	1591	1948	770	735	305	-0.691895	1.0905e-07	down		AT4G36988	Chr4	17441400	17441999
Chr1	23371000	23371399	784	1045	496	464	261	-0.382751	0.0124387	down		AT1G36305	Chr1	13659800	13660399
Chr1	23814600	23814999	630	726	336	312	221	-0.527761	0.000676296	down		AT1G36520	Chr1	13772000	13772799
Chr1	23856400	23856999	959	1105	303	295	314	-1.24945	1.08014e-18	down		AT1G36915	Chr1	13979000	13979599
Chr1	2454600	2455599	1764	2191	1066	1051	633	-0.358321	0.0110616	down		AT1G37110	Chr1	14134800	14135599
Chr1	24552400	24552799	625	784	310	343	211	-0.563975	0.000341552	down		AT1G40083	Chr1	14923400	14923999
Chr1	25574000	25574399	790	1031	501	457	236	-0.381259	0.0124533	down		AT1G40084	Chr1	14923400	14923999
Chr1	26012400	26012799	694	848	342	409	196	-0.492746	0.00339951	down		AT1G42602	Chr1	16010200	16011599
Chr1	26036000	26036799	855	1107	514	551	456	-0.333937	0.0366402	down		AT1G43030	Chr1	16176200	16176799
Chr1	26382400	26382999	976	1072	602	512	354	-0.34633	0.0342846	down		AT1G43330	Chr1	16359000	16359399
Chr1	26468400	26469199	973	1323	593	574	436	-0.427014	0.00398987	down		AT1G43667	Chr1	16465200	16465799
Chr1	26494000	26494599	1506	1893	1003	886	395	-0.305277	0.038038	down		AT1G44050	Chr1	16739400	16739799
Chr1	26680000	26680399	763	888	477	437	268	-0.3153	0.0490546	down		AT1G44990	Chr1	17007400	17007999
Chr1	26961800	26962199	783	965	379	374	260	-0.672271	2.71043e-06	down		AT1G47625	Chr1	17511800	17512399
Chr1	27033600	27034399	1785	2140	1099	1045	552	-0.332335	0.0198486	down		AT1G48400	Chr1	17882600	17883199
Chr1	29179800	29180999	1237	1449	594	590	679	-0.642585	3.27686e-06	down		AT1G49770	Chr1	18425400	18425799
Chr1	3980000	3980599	1477	1741	864	735	390	-0.472141	0.00103334	down		AT1G51220	Chr1	18991800	18992599
Chr1	4218200	4218799	799	928	452	492	371	-0.331119	0.0459748	down		AT1G51900	Chr1	19280800	19281999
Chr1	4595200	4595599	521	659	260	261	191	-0.634886	4.13362e-05	down		AT1G53340	Chr1	19901600	19901999
Chr1	4651200	4651799	1114	1383	693	629	355	-0.375611	0.0101218	down		AT1G53660	Chr1	20033200	20033599
Chr1	4704600	4704999	387	532	219	209	261	-0.553717	0.00095835	down		AT1G62240	Chr1	22994800	22995399
Chr1	5252400	5252999	1113	1404	667	667	415	-0.371313	0.0116187	down		AT1G63040	Chr1	23371000	23371399
Chr1	5653000	5653399	441	549	290	244	204	-0.349334	0.0444075	down		AT1G64160	Chr1	23814600	23814999
Chr1	6575000	6575399	770	965	452	468	280	-0.370592	0.0177348	down		AT1G07920	Chr1	2454600	2455599
Chr1	6593400	6593799	702	845	354	314	224	-0.671909	4.93476e-06	down		AT1G68238	Chr1	25574000	25574399
Chr1	6723000	6723399	1200	1543	729	561	228	-0.546898	0.000372993	down		AT1G70050	Chr1	26382400	26382999
Chr1	7469400	7469999	1160	1414	744	685	421	-0.308204	0.0391226	down		AT1G70280	Chr1	26468400	26469199
Chr1	8160800	8161399	735	962	456	427	336	-0.396554	0.00963257	down		AT1G70320	Chr1	26494000	26494599
Chr1	8311200	8311599	553	718	300	327	227	-0.47193	0.00377545	down		AT1G70750	Chr1	26680000	26680399
Chr1	8388600	8391599	9434	11717	6314	5644	2078	-0.281399	0.040236	down		AT1G71870	Chr1	27033600	27034399
Chr1	8595800	8596199	468	594	289	283	268	-0.348265	0.0389075	down		AT1G77650	Chr1	29179800	29180999
Chr1	9078200	9079599	2078	2706	1236	1166	800	-0.447926	0.000847127	down		AT1G13600	Chr1	4651200	4651799
Chr1	9282600	9283599	1332	1649	643	635	463	-0.678839	3.69795e-07	down		AT1G15270	Chr1	5252400	5252999
Chr1	9352400	9353399	1396	1756	788	831	508	-0.415722	0.00442196	down		AT1G19420	Chr1	6723000	6723399
Chr1	9386000	9386599	731	798	323	330	294	-0.692386	7.42607e-06	down		AT1G21326	Chr1	7469400	7469999
Chr1	9707600	9708399	1383	2066	937	823	374	-0.415762	0.0086175	down		AT1G23720	Chr1	8388600	8391599
Chr1	9756400	9756999	1408	1668	834	741	352	-0.42766	0.00277413	down		AT1G26240	Chr1	9078200	9079599
Chr1	9787600	9788199	698	834	442	360	338	-0.396011	0.014953	down		AT1G26799	Chr1	9282600	9283599
Chr2	10036200	10036599	638	730	292	277	213	-0.728223	1.44663e-06	down		AT1G27870	Chr1	9707600	9708399
Chr2	10329600	10330199	1306	1566	865	724	342	-0.316086	0.0409824	down		AT1G28000	Chr1	9756400	9756999
Chr2	10406000	10406599	598	810	362	354	354	-0.426899	0.00715399	down		AT2G24270	Chr2	10329600	10330199
Chr2	10411600	10411999	433	553	212	215	178	-0.662196	3.784e-05	down		AT2G24750	Chr2	10541000	10541399
Chr2	10541000	10541399	396	486	152	178	197	-0.873992	2.2014e-07	down		AT2G24980	Chr2	10623600	10624199
Chr2	10623600	10624199	776	992	484	366	234	-0.515575	0.00149437	down		AT2G03933	Chr2	1217600	1217999
Chr2	10989400	10989799	1300	1516	787	703	336	-0.381292	0.0097125	down		AT2G04036	Chr2	1327600	1328199
Chr2	11433000	11433799	1467	1692	701	617	474	-0.725192	1.03418e-07	down		AT2G31990	Chr2	13613200	13613999
Chr2	11646200	11646799	698	945	469	411	355	-0.353583	0.0272312	down		AT2G04115	Chr2	1384800	1385199
Chr2	1217600	1217999	579	635	283	299	209	-0.52453	0.00155697	down		AT2G04210	Chr2	1435200	1436399
Chr2	12875600	12876799	1600	1992	991	895	707	-0.387544	0.00576024	down		AT2G04622	Chr2	1614600	1615399
Chr2	12941800	12942599	1214	1371	703	695	491	-0.350264	0.0222911	down		AT2G04970	Chr2	1747200	1748399
Chr2	13200000	13200399	637	751	294	289	231	-0.711663	1.98532e-06	down		AT2G43860	Chr2	18164400	18164799
Chr2	13232800	13233599	1583	2037	888	843	408	-0.519155	0.000107467	down		AT2G45840	Chr2	18868400	18868999
Chr2	1327600	1328199	625	747	394	329	295	-0.385926	0.0183164	down		AT2G05220	Chr2	1896400	1896999
Chr2	13613200	13613999	1142	1367	723	645	458	-0.336069	0.0251186	down		AT2G05640	Chr2	2097000	2098199
Chr2	1384800	1385199	803	960	312	300	221	-0.986169	3.4419e-12	down		AT2G05700	Chr2	2134000	2134599
Chr2	14192800	14193399	818	987	479	462	322	-0.398765	0.00847068	down		AT2G05820	Chr2	2221200	2221999
Chr2	1435200	1436399	3510	4338	2245	1966	851	-0.357527	0.00949369	down		AT2G06285	Chr2	2473200	2473799
Chr2	1457800	1458999	1377	1744	614	600	671	-0.817712	4.24952e-10	down		AT2G10070	Chr2	3818200	3818999
Chr2	1614600	1615399	951	1226	601	549	361	-0.376105	0.0114341	down		AT2G10160	Chr2	3853200	3853599
Chr2	16288200	16288599	1303	1719	737	601	290	-0.631034	1.03583e-05	down		AT2G10232	Chr2	3907800	3908199
Chr2	16648600	16649199	1018	1349	670	633	385	-0.314117	0.0384376	down		AT2G11005	Chr2	4349000	4349999
Chr2	1715800	1716399	1020	1426	693	630	381	-0.336341	0.0304037	down		AT2G13142	Chr2	5425400	5425799
Chr2	1747200	1748399	1075	1326	610	539	382	-0.52227	0.000220785	down		AT2G13175	Chr2	5455000	5456799
Chr2	18164400	18164799	612	851	368	387	273	-0.402703	0.0143227	down		AT2G13800	Chr2	5752600	5752999
Chr2	18279000	18280199	1343	1743	818	862	670	-0.32956	0.0301169	down		AT2G14140	Chr2	5968800	5969799
Chr2	18868400	18868999	662	814	309	357	339	-0.603187	0.0001579	down		AT2G14450	Chr2	6148800	6149199
Chr2	1896400	1896999	748	847	344	335	288	-0.695225	2.97088e-06	down		AT2G02380	Chr2	625800	626199
Chr2	19262200	19262999	1065	1325	634	592	450	-0.420553	0.00346454	down		AT2G15200	Chr2	6601200	6601599
Chr2	2097000	2098199	1294	1651	753	723	600	-0.451804	0.00118535	down		AT2G15740	Chr2	6858400	6858999
Chr2	2134000	2134599	977	1112	568	533	367	-0.387604	0.011181	down		AT2G16490	Chr2	7148200	7148799
Chr2	2221200	2221999	841	1040	512	525	478	-0.315468	0.0449684	down		AT2G18190	Chr2	7916400	7917199
Chr2	2473200	2473799	1740	2432	1062	940	405	-0.509164	0.000320625	down		AT2G18540	Chr2	8042200	8043399
Chr2	2758400	2758799	550	569	249	243	199	-0.654196	9.52494e-05	down		AT2G19220	Chr2	8340800	8341199
Chr2	3529000	3530399	3297	4042	1649	1662	914	-0.605534	2.18314e-06	down		AT2G20460	Chr2	8820800	8821599
Chr2	3818200	3818999	2808	3480	1755	1542	594	-0.390494	0.00433925	down		AT2G21420	Chr2	9171400	9171999
Chr2	3853200	3853599	475	597	252	310	260	-0.384461	0.0371353	down		AT3G28550	Chr3	10700800	10703799
Chr2	3907800	3908199	427	511	238	245	272	-0.416028	0.0153341	down		AT3G29110	Chr3	11081800	11082799
Chr2	4337600	4338199	1283	1701	741	695	391	-0.508065	0.00024363	down		AT3G30450	Chr3	12085400	12085799
Chr2	4349000	4349999	1280	1560	657	683	539	-0.540818	0.000123612	down		AT3G30730	Chr3	12357800	12358799
Chr2	4438800	4439599	914	1121	456	443	400	-0.636487	5.78499e-06	down		AT3G42148	Chr3	14308600	14308999
Chr2	5053400	5053999	622	868	340	381	335	-0.494218	0.00279657	down		AT3G42316	Chr3	14470200	14470599
Chr2	5203000	5203799	814	1119	312	350	629	-0.993751	3.11118e-11	down		AT3G42450	Chr3	14584600	14585999
Chr2	5425400	5425799	747	926	425	370	229	-0.532166	0.000350026	down		AT3G42794	Chr3	14897200	14897599
Chr2	5455000	5456799	4605	5831	3025	2723	1253	-0.317391	0.0200659	down		AT3G42875	Chr3	14952400	14952799
Chr2	5607800	5608799	1139	1488	649	601	515	-0.525676	0.000157455	down		AT3G43870	Chr3	15728200	15729199
Chr2	565400	566199	2046	2506	1149	1081	476	-0.488033	0.000227692	down		AT3G44010	Chr3	15800200	15800999
Chr2	5752600	5752999	565	742	274	319	210	-0.590884	0.000317332	down		AT3G44035	Chr3	15807800	15808199
Chr2	5968800	5969799	921	1132	340	327	299	-1.07987	5.49129e-15	down		AT3G44140	Chr3	15884800	15885599
Chr2	6148800	6149199	484	621	305	260	209	-0.424471	0.0104712	down		AT3G44326	Chr3	16002200	16002599
Chr2	6207200	6208599	1582	1941	706	695	730	-0.787988	1.33648e-09	down		AT3G44440	Chr3	16070800	16071199
Chr2	6212800	6213199	759	858	282	350	173	-0.815145	8.34483e-07	down		AT3G44830	Chr3	16369200	16369799
Chr2	6235400	6236399	1021	1447	657	640	656	-0.375712	0.0150469	down		AT3G46487	Chr3	17110800	17111199
Chr2	625800	626199	464	559	248	237	216	-0.535795	0.000922171	down		AT3G47270	Chr3	17411400	17411999
Chr2	6320600	6321199	733	904	431	443	383	-0.361917	0.0216837	down		AT3G50770	Chr3	18874400	18874999
Chr2	6521200	6521599	592	699	297	307	212	-0.555248	0.00039234	down		AT3G58320	Chr3	21586200	21586799
Chr2	6601200	6601599	461	562	196	193	118	-0.852975	5.59348e-08	down		AT3G59850	Chr3	22111400	22111799
Chr2	6858400	6858999	789	1034	553	408	382	-0.381505	0.0284116	down		AT3G62499	Chr3	23118600	23119199
Chr2	7148200	7148799	662	842	398	404	388	-0.36189	0.0228615	down		AT3G15600	Chr3	5278400	5279199
Chr2	7278000	7278999	1165	1464	641	625	585	-0.51031	0.000240689	down		AT3G18010	Chr3	6163000	6163599
Chr2	7752800	7753399	743	904	401	407	338	-0.485107	0.00132027	down		AT3G19895	Chr3	6921800	6922399
Chr2	7916400	7917199	920	1103	406	411	406	-0.766898	4.84452e-08	down		AT3G22240	Chr3	7864400	7864999
Chr2	794200	795399	1391	1786	606	665	597	-0.774132	2.99602e-08	down		AT4G20820	Chr4	11151400	11151799
Chr2	8016600	8017399	1238	1420	709	637	447	-0.445671	0.00228402	down		AT4G23660	Chr4	12332000	12333199
Chr2	8042200	8043399	5212	6761	3496	3106	999	-0.314145	0.0228979	down		AT4G23670	Chr4	12332000	12333199
Chr2	8340800	8341199	663	831	367	339	222	-0.538561	0.000317045	down		AT4G23810	Chr4	12393800	12394199
Chr2	8655400	8655999	856	1106	448	461	292	-0.563348	0.000107804	down		AT4G27435	Chr4	13722800	13723599
Chr2	8820800	8821599	1581	1943	947	868	474	-0.416007	0.00271796	down		AT4G35295	Chr4	16793800	16794999
Chr2	9171400	9171999	1004	1246	648	569	404	-0.345295	0.0223424	down		AT4G37705	Chr4	17711800	17712199
Chr2	9328200	9328999	1802	2355	1229	1073	500	-0.307802	0.0362129	down		AT4G39180	Chr4	18248000	18248399
Chr2	9360800	9361799	1261	1498	732	731	526	-0.374878	0.0107915	down		AT4G04693	Chr4	2380200	2380799
Chr2	9652800	9653399	707	892	448	406	242	-0.361856	0.0203035	down		AT4G05526	Chr4	2810400	2810799
Chr3	10033200	10033799	1209	1520	795	674	377	-0.351993	0.0194075	down		AT4G05553	Chr4	2825000	2825399
Chr3	10176400	10176799	606	670	328	305	229	-0.476472	0.00333292	down		AT4G06487	Chr4	3100400	3100999
Chr3	10537600	10538199	793	940	428	388	321	-0.547796	0.000199212	down		AT4G06642	Chr4	3794600	3795399
Chr3	10700800	10703799	6694	8243	4235	3643	1809	-0.383089	0.00483086	down		AT4G06644	Chr4	3794600	3795399
Chr3	10811400	10811799	418	593	230	276	214	-0.444167	0.0160778	down		AT4G06654	Chr4	3831400	3832199
Chr3	10877200	10877799	845	1085	455	486	371	-0.489507	0.0012029	down		AT4G08136	Chr4	5122400	5122799
Chr3	10937600	10938599	1632	2232	872	834	492	-0.629599	2.89895e-06	down		AT4G08370	Chr4	5302600	5303199
Chr3	10955600	10955999	690	872	448	402	232	-0.334897	0.0344826	down		AT4G08380	Chr4	5311000	5312599
Chr3	11081800	11082799	1164	1444	708	712	552	-0.333491	0.0253579	down		AT4G08650	Chr4	5521200	5521799
Chr3	11090000	11090399	627	683	287	271	202	-0.697187	8.58103e-06	down		AT4G08650	Chr4	5523600	5523999
Chr3	11092200	11092799	693	961	365	418	349	-0.525698	0.00134468	down		AT4G11340	Chr4	6899600	6899999
Chr3	11315600	11315999	582	680	202	218	149	-1.04695	1.32253e-11	down		AT4G11800	Chr4	7099800	7100599
Chr3	11370000	11371199	1567	1941	955	838	705	-0.427247	0.00233467	down		AT4G12920	Chr4	7567600	7568399
Chr3	11470200	11470799	715	889	447	433	317	-0.32304	0.0406878	down		AT4G13170	Chr4	7655400	7656199
Chr3	11590400	11590999	753	927	467	407	392	-0.401992	0.00923809	down		AT4G13470	Chr4	7828600	7829599
Chr3	11896000	11896999	1529	1922	935	856	556	-0.403382	0.00382723	down		AT4G01975	Chr4	862400	862999
Chr3	11929800	11930399	867	1015	368	402	315	-0.748631	4.37828e-07	down		AT4G17800	Chr4	9896600	9896799
Chr3	12073400	12074199	1099	1463	702	688	468	-0.33408	0.0262109	down		AT5G28056	Chr5	10064200	10065199
Chr3	12076600	12076999	697	960	362	323	201	-0.725723	9.0569e-07	down		AT5G28700	Chr5	10757400	10757999
Chr3	12085400	12085799	331	452	210	169	130	-0.500609	0.00537132	down		AT5G30545	Chr5	11643000	11643599
Chr3	12276200	12278799	5419	6712	3267	2985	1538	-0.414688	0.00136245	down		AT5G34960	Chr5	13251800	13252399
Chr3	12357800	12358799	1577	1835	787	769	601	-0.594416	1.21273e-05	down		AT5G37175	Chr5	14716000	14716399
Chr3	12562600	12562999	647	828	320	273	227	-0.771444	1.90589e-07	down		AT5G37383	Chr5	14827000	14827399
Chr3	12730800	12731199	659	840	253	263	206	-0.993017	1.44641e-11	down		AT5G37420	Chr5	14841600	14842199
Chr3	12913400	12914199	1820	2166	927	808	406	-0.662085	6.84948e-07	down		AT5G37430	Chr5	14841600	14842199
Chr3	12915400	12916799	2052	2527	1418	1093	734	-0.328813	0.0424829	down		AT5G37430	Chr5	14843400	14844399
Chr3	13001800	13002199	490	519	173	170	168	-1.02351	6.24041e-10	down		AT5G38820	Chr5	15542400	15542799
Chr3	13260200	13260599	632	783	301	305	245	-0.680005	5.12605e-06	down		AT5G39260	Chr5	15728000	15728599
Chr3	1359000	1359999	1191	1535	586	594	557	-0.661625	1.31951e-06	down		AT5G41250	Chr5	16502600	16503199
Chr3	14096400	14096799	515	633	238	304	206	-0.536441	0.002876	down		AT5G41280	Chr5	16510400	16510799
Chr3	14308600	14308999	906	1174	613	526	271	-0.324896	0.0373628	down		AT5G42235	Chr5	16886600	16886999
Chr3	1444400	1444999	1250	1594	694	656	370	-0.530507	0.000104264	down		AT5G42280	Chr5	16906800	16907599
Chr3	14470200	14470599	711	794	394	404	195	-0.37854	0.0211637	down		AT5G42580	Chr5	17024800	17025399
Chr3	14584600	14585999	3471	4188	1868	1694	865	-0.564979	9.09465e-06	down		AT5G43570	Chr5	17505800	17506199
Chr3	14897200	14897599	812	1033	528	416	214	-0.425467	0.0081205	down		AT5G45840	Chr5	18597000	18598599
Chr3	14912200	14913399	2659	3269	1645	1545	759	-0.352345	0.00984801	down		AT5G46730	Chr5	18964000	18964999
Chr3	14952400	14952799	650	823	320	286	226	-0.738266	4.86007e-07	down		AT5G46830	Chr5	19002000	19002399
Chr3	15162400	15162999	869	1040	516	522	366	-0.337853	0.0300689	down		AT5G47150	Chr5	19151400	19151999
Chr3	15169800	15170599	1465	1870	890	857	514	-0.387925	0.00587569	down		AT5G49080	Chr5	19890800	19891599
Chr3	15477000	15477399	690	742	390	331	185	-0.458663	0.00589351	down		AT5G53487	Chr5	21723000	21723599
Chr3	15506000	15507199	1432	1736	725	673	668	-0.639708	1.51366e-06	down		AT5G07170	Chr5	2222000	2222399
Chr3	15728200	15729199	1690	2178	1037	1029	562	-0.358573	0.0116398	down		AT5G55020	Chr5	22324800	22325799
Chr3	15800200	15800999	2084	2616	1165	1081	614	-0.522301	6.44782e-05	down		AT5G56350	Chr5	22821600	22822999
Chr3	15807800	15808199	908	1166	543	530	248	-0.405366	0.00622093	down		AT5G59290	Chr5	23918600	23918999
Chr3	15845400	15846199	887	1075	329	312	373	-1.07297	1.35778e-14	down		AT5G63740	Chr5	25511000	25511399
Chr3	15883600	15884399	945	1228	397	411	395	-0.880156	2.75299e-10	down		AT5G10990	Chr5	3476200	3476799
Chr3	15884800	15885599	1847	2217	1022	1007	546	-0.461351	0.000730159	down		AT5G17450	Chr5	5755000	5755599
Chr3	15892600	15893399	1173	1582	576	576	513	-0.708512	2.56542e-07	down		AT5G17790	Chr5	5873200	5873599
Chr3	16002200	16002599	840	952	425	466	206	-0.469434	0.00338307	down		AT5G21105	Chr5	7174800	7175599
Chr3	16070800	16071199	766	980	461	441	276	-0.408086	0.00696695	down		AT5G03130	Chr5	734600	735599
Chr3	16292600	16292999	401	502	246	230	252	-0.380775	0.0272468	down		AT5G23270	Chr5	7840600	7840999
Chr3	16355000	16357399	4318	5461	2601	2425	1417	-0.416614	0.00132204	down		AT5G26240	Chr5	9188800	9189399
Chr3	16369200	16369799	892	1139	540	450	385	-0.494213	0.000955876	down		AT5G27780	Chr5	9839800	9840399
Chr3	16421200	16421599	377	535	207	232	249	-0.501913	0.00484746	down		AT5G27845	Chr5	9867200	9867999
Chr3	16935000	16935799	1012	1171	522	512	513	-0.53984	0.00018718	down		AT1G62440	Chr1	23114200	23115599
Chr3	17058800	17059399	925	1193	625	532	413	-0.328853	0.0350069	down		AT1G62760	Chr1	23238000	23238599
Chr3	17110800	17111199	527	682	284	257	197	-0.615488	6.66234e-05	down		AT1G11785	Chr1	3980000	3980599
Chr3	17397200	17398199	1291	1616	607	584	533	-0.743938	1.807e-08	down		AT1G15280	Chr1	5252400	5252999
Chr3	17411400	17411999	647	746	221	215	268	-1.13768	4.23804e-14	down		AT1G23390	Chr1	8311200	8311599
Chr3	17642600	17642999	532	678	352	245	175	-0.479465	0.00839423	down		AT1G24260	Chr1	8595800	8596199
Chr3	17904200	17904799	851	1174	542	507	346	-0.399265	0.00910475	down		AT2G25760	Chr2	10989400	10989799
Chr3	18616400	18616999	884	1119	540	515	364	-0.380885	0.0107854	down		AT2G26800	Chr2	11433000	11433799
Chr3	18868400	18869399	1441	1690	905	851	673	-0.29602	0.0473391	down		AT2G39000	Chr2	16288200	16288599
Chr3	18874400	18874999	780	991	386	426	389	-0.578471	0.000145623	down		AT2G21990	Chr2	9360800	9361799
Chr3	19935000	19935599	872	1137	512	480	409	-0.472281	0.00119374	down		AT2G22710	Chr2	9652800	9653399
Chr3	20427000	20427799	1062	1209	591	567	419	-0.434992	0.00351234	down		AT3G42150	Chr3	14308600	14308999
Chr3	21586200	21586799	1075	1437	711	672	343	-0.313276	0.0385323	down		AT3G50210	Chr3	18616400	18616999
Chr3	22111400	22111799	662	800	380	335	278	-0.492108	0.00134378	down		AT3G53810	Chr3	19935000	19935599
Chr3	22458000	22458599	927	1097	471	434	346	-0.622353	1.14712e-05	down		AT3G13270	Chr3	4288200	4288799
Chr3	22915800	22916199	479	519	258	258	231	-0.416693	0.0172294	down		AT3G15590	Chr3	5278400	5279199
Chr3	23118600	23119199	883	1027	370	327	316	-0.917236	1.06484e-10	down		AT3G01220	Chr3	74200	74999
Chr3	2773400	2774199	1306	1605	776	710	408	-0.428832	0.00231626	down		AT3G03855	Chr3	986000	986599
Chr3	2852200	2852799	914	1182	580	511	360	-0.397758	0.00797873	down		AT4G20870	Chr4	11177400	11177999
Chr3	3803600	3803999	730	985	452	460	208	-0.361772	0.0226844	down		AT4G35140	Chr4	16724000	16724599
Chr3	4288200	4288799	924	1087	461	503	358	-0.519684	0.000670973	down		AT4G36990	Chr4	17441400	17441999
Chr3	5278400	5279199	1031	1229	431	484	567	-0.762045	2.20061e-07	down		AT4G37000	Chr4	17441400	17441999
Chr3	6163000	6163599	762	991	483	472	369	-0.330046	0.0347016	down		AT4G08220	Chr4	5186600	5187399
Chr3	6350200	6350799	1102	1397	714	675	438	-0.303281	0.0427318	down		AT4G08480	Chr4	5391800	5392599
Chr3	6921800	6922399	973	1336	674	596	360	-0.313957	0.0454362	down		AT4G01650	Chr4	707200	707799
Chr3	74200	74999	927	1069	389	364	387	-0.869075	6.66356e-10	down		AT4G01980	Chr4	864600	865199
Chr3	7669400	7669799	818	975	466	437	253	-0.449874	0.00261272	down		AT5G39580	Chr5	15847800	15848199
Chr3	7864400	7864999	988	1228	599	532	326	-0.428743	0.00338798	down		AT5G40690	Chr5	16291000	16291399
Chr3	7923600	7923999	591	740	294	291	193	-0.642243	2.03644e-05	down		AT5G41260	Chr5	16502600	16503199
Chr3	873000	873599	2049	2626	1002	1022	426	-0.661458	4.32935e-07	down		AT5G43100	Chr5	17298000	17298599
Chr3	8945200	8945599	631	827	375	399	224	-0.365655	0.0253411	down		AT5G43930	Chr5	17676200	17676599
Chr3	8947800	8948199	660	891	447	378	246	-0.36431	0.0252051	down		AT5G57610	Chr5	23329000	23329599
Chr3	9366200	9366599	602	776	276	271	208	-0.787462	1.04347e-07	down		AT5G60160	Chr5	24227600	24227999
Chr3	9371000	9371599	844	1026	473	488	365	-0.417907	0.00612045	down		AT5G60170	Chr5	24227600	24227999
Chr3	986000	986599	1050	1396	606	520	297	-0.57343	6.13115e-05	down		AT5G62165	Chr5	24966400	24966999
Chr4	11151400	11151799	830	981	507	458	249	-0.36966	0.0165886	down		AT5G65590	Chr5	26212800	26213799
Chr4	11177400	11177999	694	851	323	324	353	-0.713171	1.07461e-06	down		AT5G09330	Chr5	2896200	2896599
Chr4	11379600	11379999	731	857	293	290	216	-0.906251	4.44334e-10	down		AT5G12390	Chr5	4012200	4012799
Chr4	11443600	11444199	728	970	423	420	369	-0.462184	0.00234367	down		AT5G23950	Chr5	8081600	8081999
Chr4	11840800	11841599	1970	2528	1318	1154	592	-0.320055	0.0266555	down		AT1G53240	Chr1	19855400	19855799
Chr4	11844600	11846399	5742	6783	3843	3160	1123	-0.303069	0.0438275	down		AT1G54410	Chr1	20310200	20310599
Chr4	11880600	11880999	717	869	455	410	306	-0.334354	0.0347088	down		AT1G60490	Chr1	22288600	22289199
Chr4	12068400	12068999	711	834	368	383	398	-0.500477	0.00122644	down		AT1G60930	Chr1	22439400	22439599
Chr4	12332000	12333199	1556	2087	1084	947	669	-0.296174	0.049649	down		AT1G64060	Chr1	23770200	23770599
Chr4	12393800	12394199	507	659	297	309	279	-0.397379	0.0165428	down		AT1G67900	Chr1	25468200	25468599
Chr4	12434800	12435399	822	1052	451	438	320	-0.530826	0.000246019	down		AT1G08260	Chr1	2603000	2603599
Chr4	13722800	13723599	1357	1775	843	825	487	-0.362039	0.0122426	down		AT1G15690	Chr1	5398800	5399799
Chr4	14327400	14327999	587	847	370	378	317	-0.385257	0.0217833	down		AT1G03060	Chr1	726600	726999
Chr4	14824000	14824599	858	1047	452	487	317	-0.477126	0.00177925	down		AT1G03680	Chr1	917200	917799
Chr4	1568600	1568999	413	492	257	224	230	-0.37269	0.033073	down		AT2G29550	Chr2	12644800	12645599
Chr4	16365800	16366399	939	1200	532	482	303	-0.532997	0.000178403	down		AT2G32010	Chr2	13626600	13627199
Chr4	16724000	16724599	1081	1434	674	603	370	-0.431502	0.00302598	down		AT2G37040	Chr2	15558000	15558599
Chr4	16793800	16794999	2135	2720	999	901	639	-0.809866	1.43985e-10	down		AT2G37630	Chr2	15781400	15782199
Chr4	17441400	17441999	881	1067	571	507	394	-0.313778	0.0438594	down		AT2G39800	Chr2	16601800	16602199
Chr4	17711800	17712199	933	1251	598	558	254	-0.370156	0.0140633	down		AT2G42260	Chr2	17602600	17602999
Chr4	18248000	18248399	809	885	255	305	191	-1.05981	3.92834e-11	down		AT2G47800	Chr2	19576200	19576799
Chr4	18456200	18456599	431	514	179	182	197	-0.847265	1.41577e-07	down		AT2G16500	Chr2	7151600	7152799
Chr4	18548400	18548999	1269	1742	807	769	381	-0.384045	0.00905131	down		AT3G06010	Chr3	1806800	1807199
Chr4	2313400	2313799	610	754	253	254	200	-0.884707	2.32864e-09	down		AT3G49850	Chr3	18489800	18490399
Chr4	2380200	2380799	1027	1299	693	602	427	-0.302471	0.0496326	down		AT3G54220	Chr3	20071000	20071399
Chr4	2550600	2550999	419	521	168	183	191	-0.876895	6.95877e-08	down		AT3G07520	Chr3	2396400	2396799
Chr4	2649400	2649799	551	764	284	298	210	-0.624794	7.45803e-05	down		AT3G09940	Chr3	3056800	3057399
Chr4	2810400	2810799	550	627	222	186	241	-0.992752	2.49821e-10	down		AT3G16890	Chr3	5769200	5770199
Chr4	2815200	2815999	1281	1664	747	655	354	-0.526279	0.000157455	down		AT3G24320	Chr3	8826200	8826599
Chr4	2825000	2825399	798	907	458	428	249	-0.407957	0.00888616	down		AT4G33000	Chr4	15924800	15925599
Chr4	3100400	3100999	1047	1352	598	503	327	-0.580215	5.21536e-05	down		AT4G04920	Chr4	2498400	2498999
Chr4	3768200	3768599	744	812	415	377	259	-0.440976	0.00613471	down		AT4G00730	Chr4	300400	301199
Chr4	3794600	3795399	857	1039	427	416	440	-0.627943	1.02136e-05	down		AT4G00730	Chr4	304000	304599
Chr4	3801600	3802199	667	809	410	369	369	-0.381653	0.015372	down		AT4G09650	Chr4	6100600	6100999
Chr4	3831400	3832199	1250	1648	806	777	445	-0.325203	0.0277561	down		AT5G04140	Chr5	1129800	1130199
Chr4	4145600	4145999	689	812	171	205	202	-1.4552	4.2086e-20	down		AT5G39890	Chr5	15974400	15975199
Chr4	4206400	4207599	1691	2135	1058	996	661	-0.353709	0.011794	down		AT5G06530	Chr5	1989800	1990999
Chr4	4218800	4219399	1351	1543	821	791	420	-0.30737	0.0435514	down		AT5G06850	Chr5	2127000	2127399
Chr4	4935800	4936399	937	1083	563	541	337	-0.333719	0.0315753	down		AT5G58960	Chr5	23807000	23807599
Chr4	4938400	4938999	1168	1469	695	630	346	-0.450147	0.00146148	down		AT5G61780	Chr5	24821600	24821799
Chr4	5122400	5122799	439	614	246	249	262	-0.538196	0.00116875	down		AT5G10010	Chr5	3127800	3128399
Chr4	5144400	5145399	1254	1593	653	654	589	-0.578018	2.44101e-05	down		AT5G17050	Chr5	5607800	5608199
Chr4	5186600	5187399	1520	1968	1029	906	539	-0.305756	0.038534	down		AT5G19690	Chr5	6656000	6656399
Chr4	5275200	5275799	824	1014	259	275	298	-1.23973	8.35402e-18	down		AT1G29470	Chr1	10312800	10313599
Chr4	5302600	5303199	1216	1420	733	651	269	-0.392415	0.00800613	down		AT1G30690	Chr1	10888200	10888999
Chr4	5311000	5312599	1884	2352	1187	1076	712	-0.362307	0.00951622	down		AT1G34110	Chr1	12420800	12421399
Chr4	5391800	5392599	1002	1274	366	392	361	-1.04014	1.19359e-13	down		AT1G35160	Chr1	12867800	12868799
Chr4	5521200	5521799	1425	1704	849	852	412	-0.338438	0.0216014	down		AT1G04730	Chr1	1326000	1326599
Chr4	5523600	5523999	693	780	424	364	236	-0.367896	0.0258057	down		AT1G01390	Chr1	149400	149999
Chr4	5837000	5837799	1049	1372	664	656	457	-0.328103	0.0295636	down		AT1G47500	Chr1	17432200	17432799
Chr4	5911600	5912399	813	1029	433	468	336	-0.485669	0.00150606	down		AT1G48090	Chr1	17758000	17758199
Chr4	5952800	5953199	679	770	371	388	200	-0.394767	0.0160592	down		AT1G05910	Chr1	1790000	1790799
Chr4	6057000	6057599	1353	1861	881	725	371	-0.453352	0.0027366	down		AT1G49660	Chr1	18378800	18379599
Chr4	6419600	6419999	617	777	337	336	237	-0.506286	0.000960969	down		AT1G51580	Chr1	19125800	19126399
Chr4	6660000	6660999	1228	1475	679	726	660	-0.401677	0.00787777	down		AT1G53645	Chr1	20027600	20027799
Chr4	6669800	6670799	1261	1526	735	725	614	-0.391294	0.00674427	down		AT1G54090	Chr1	20189800	20190199
Chr4	6867600	6867999	627	783	324	341	204	-0.539763	0.000475696	down		AT1G54115	Chr1	20202600	20202999
Chr4	6899600	6899999	836	1073	259	266	205	-1.31652	2.64696e-20	down		AT1G54350	Chr1	20289600	20289999
Chr4	707200	707799	851	1059	487	440	296	-0.500906	0.000575407	down		AT1G54355	Chr1	20289600	20289999
Chr4	7099800	7100599	1668	2102	976	825	467	-0.52416	0.000158818	down		AT1G55350	Chr1	20659000	20659199
Chr4	7423800	7425399	2256	2711	1214	1184	994	-0.509896	0.000115178	down		AT1G56060	Chr1	20966600	20966799
Chr4	7555400	7555799	876	1031	389	393	216	-0.746163	1.70701e-07	down		AT1G56060	Chr1	20967800	20968199
Chr4	7567600	7568399	2215	2764	1160	1068	579	-0.617694	1.37534e-06	down		AT1G58250	Chr1	21601000	21601799
Chr4	7655400	7656199	1406	1754	925	815	566	-0.319207	0.0302949	down		AT1G60590	Chr1	22315800	22316199
Chr4	7814400	7814799	597	667	365	312	221	-0.36647	0.0307669	down		AT1G61360	Chr1	22640600	22640999
Chr4	7828600	7829599	2010	2473	1249	1143	673	-0.365004	0.00854203	down		AT1G62975	Chr1	23329600	23329999
Chr4	7944800	7945399	1330	1846	772	678	359	-0.581797	3.91765e-05	down		AT1G63100	Chr1	23399400	23399799
Chr4	8016400	8016999	880	1092	501	428	384	-0.544969	0.000191826	down		AT1G63690	Chr1	23620000	23620999
Chr4	8096600	8096999	480	613	237	264	202	-0.578879	0.000419499	down		AT1G64385	Chr1	23899600	23900799
Chr4	862400	862999	1057	1397	662	638	400	-0.369347	0.0125305	down		AT1G07880	Chr1	2434400	2434999
Chr4	864600	865199	698	894	461	391	286	-0.358934	0.0247517	down		AT1G65710	Chr1	24437800	24437999
Chr4	9896600	9896799	128	156	73	65	110	-0.499496	0.0367614	down		AT1G67040	Chr1	25022000	25022599
Chr5	10064200	10065199	1353	1583	805	747	590	-0.381789	0.00860313	down		AT1G67510	Chr1	25298800	25299199
Chr5	10125400	10126199	1931	2422	1148	1032	519	-0.455325	0.000748765	down		AT1G67800	Chr1	25422800	25423399
Chr5	1029600	1030399	1165	1374	558	555	340	-0.650073	2.65605e-06	down		AT1G68640	Chr1	25771200	25771999
Chr5	10422400	10422799	738	997	445	432	279	-0.435638	0.00438597	down		AT1G68720	Chr1	25803400	25803799
Chr5	1042400	1043599	2211	2567	1393	1305	866	-0.287218	0.0494965	down		AT1G68910	Chr1	25909000	25909799
Chr5	10568800	10569399	611	812	222	242	294	-1.06788	2.07082e-12	down		AT1G69330	Chr1	26063800	26065199
Chr5	10570000	10570399	573	734	236	261	227	-0.848278	3.5721e-08	down		AT1G08350	Chr1	2636000	2636599
Chr5	10609200	10609599	634	728	271	268	179	-0.799245	1.13987e-07	down		AT1G71696	Chr1	26965800	26966199
Chr5	10746600	10747199	1074	1352	669	622	362	-0.366842	0.0122173	down		AT1G73630	Chr1	27684600	27684799
Chr5	10757400	10757999	1376	1743	916	808	400	-0.312565	0.0346351	down		AT1G73650	Chr1	27689000	27690199
Chr5	10853400	10854399	1096	1352	524	520	503	-0.686603	5.06502e-07	down		AT1G74120	Chr1	27872400	27872999
Chr5	11019400	11019799	526	603	212	218	194	-0.853995	5.20374e-08	down		AT1G74160	Chr1	27887400	27888199
Chr5	11029200	11030399	1779	2022	949	949	697	-0.46491	0.00110017	down		AT1G74510	Chr1	28005000	28005199
Chr5	11546600	11546999	619	776	348	333	246	-0.491146	0.00133011	down		AT1G74600	Chr1	28025600	28025999
Chr5	11640600	11641399	905	1115	533	554	445	-0.350411	0.0237248	down		AT1G75210	Chr1	28222800	28224399
Chr5	11643000	11643599	1464	1916	993	858	405	-0.323961	0.0297387	down		AT1G75260	Chr1	28247800	28248599
Chr5	12306200	12306599	536	575	301	281	222	-0.399586	0.0207869	down		AT1G76720	Chr1	28797200	28798599
Chr5	12307600	12307999	557	748	274	277	259	-0.695423	5.42795e-06	down		AT1G76950	Chr1	28906400	28906799
Chr5	12673200	12673799	1130	1474	679	601	391	-0.479643	0.00075549	down		AT1G77350	Chr1	29069600	29069999
Chr5	12685400	12685999	972	1329	641	582	344	-0.36321	0.017158	down		AT1G77400	Chr1	29085600	29086399
Chr5	12702400	12703799	2460	3147	1593	1534	783	-0.29731	0.0346773	down		AT1G78580	Chr1	29557000	29558199
Chr5	12896000	12896599	1101	1457	733	588	366	-0.409119	0.00887915	down		AT1G78820	Chr1	29634600	29635199
Chr5	13096800	13097399	1237	1525	690	639	346	-0.513675	0.00019287	down		AT1G78990	Chr1	29714800	29715199
Chr5	13251800	13252399	890	1047	409	414	361	-0.694954	1.23636e-06	down		AT1G79710	Chr1	29995600	29995999
Chr5	13371400	13372399	1845	2121	1146	1086	665	-0.292496	0.0491534	down		AT1G80680	Chr1	30324200	30324599
Chr5	13621200	13621399	283	348	86	81	71	-1.37565	1.09125e-13	down		AT1G80880	Chr1	30397000	30397199
Chr5	13907600	13908599	935	1191	495	534	511	-0.500388	0.000838315	down		AT1G01950	Chr1	325600	326399
Chr5	13977000	13977399	635	698	141	162	184	-1.60066	1.68106e-22	down		AT1G10510	Chr1	3461000	3461599
Chr5	14539400	14540399	1659	2096	1041	928	637	-0.388601	0.00568659	down		AT1G10580	Chr1	3493000	3493399
Chr5	14614600	14614999	667	785	398	373	239	-0.374253	0.0184852	down		AT1G11440	Chr1	3849200	3849399
Chr5	14676000	14676799	1117	1286	661	626	456	-0.363574	0.0157546	down		AT1G12120	Chr1	4115000	4116199
Chr5	14716000	14716399	518	611	281	273	184	-0.487275	0.0024876	down		AT1G12750	Chr1	4345600	4346199
Chr5	14827000	14827399	580	773	388	333	224	-0.362347	0.0274496	down		AT1G12750	Chr1	4348000	4348199
Chr5	14841600	14842199	1275	1711	746	687	374	-0.511489	0.000244353	down		AT1G14460	Chr1	4951200	4952599
Chr5	14843400	14844399	2055	2600	1229	1077	600	-0.470866	0.000514234	down		AT1G14687	Chr1	5047800	5048199
Chr5	15534000	15534399	691	863	394	324	244	-0.573009	0.000177716	down		AT1G15910	Chr1	5465200	5465799
Chr5	15542400	15542799	922	1022	523	466	284	-0.44126	0.00450489	down		AT1G16700	Chr1	5709800	5710799
Chr5	15728000	15728599	1221	1529	741	622	392	-0.471535	0.00116361	down		AT1G02690	Chr1	583600	583999
Chr5	15796200	15797399	1431	1819	674	651	690	-0.749839	9.61485e-09	down		AT1G17120	Chr1	5852000	5852999
Chr5	15847800	15848199	683	795	371	351	220	-0.495198	0.0012552	down		AT1G20840	Chr1	7245000	7245599
Chr5	16291000	16291399	1052	1377	602	572	302	-0.502583	0.000372665	down		AT1G21650	Chr1	7593200	7593599
Chr5	16502600	16503199	934	1108	559	512	364	-0.392104	0.00900276	down		AT1G22230	Chr1	7850600	7850999
Chr5	16510400	16510799	588	737	344	348	203	-0.392967	0.0142666	down		AT1G22550	Chr1	7967400	7967999
Chr5	16886600	16886999	601	705	300	340	209	-0.48749	0.00336919	down		AT1G22610	Chr1	7996600	7997399
Chr5	16906800	16907599	1573	2064	1021	889	501	-0.384075	0.00772804	down		AT1G22650	Chr1	8015800	8016199
Chr5	16997800	16998199	739	1066	355	409	241	-0.684174	2.31937e-05	down		AT1G24170	Chr1	8558600	8558999
Chr5	17024800	17025399	1026	1117	589	577	394	-0.344179	0.0322312	down		AT1G03687	Chr1	917200	917799
Chr5	17298000	17298599	919	1117	554	560	402	-0.327785	0.0338435	down		AT1G26640	Chr1	9210600	9211199
Chr5	17505800	17506199	466	603	278	282	201	-0.38668	0.0211611	down		AT1G26650	Chr1	9210600	9211199
Chr5	17676200	17676599	564	786	229	230	217	-1.00557	4.50877e-11	down		AT1G27460	Chr1	9534600	9534999
Chr5	18074400	18074999	685	922	345	375	283	-0.60821	7.80748e-05	down		AT2G23740	Chr2	10101200	10102399
Chr5	18358200	18358599	607	748	336	364	259	-0.408754	0.0123933	down		AT2G24180	Chr2	10281800	10282199
Chr5	18533000	18533399	527	651	304	259	200	-0.524232	0.00100236	down		AT2G24230	Chr2	10304200	10304599
Chr5	18597000	18598599	1707	2194	1095	1070	958	-0.30378	0.0355682	down		AT2G25000	Chr2	10631200	10631399
Chr5	18964000	18964999	2789	3323	1812	1600	806	-0.302993	0.0348466	down		AT2G25190	Chr2	10733000	10733199
Chr5	19002000	19002399	744	910	387	380	200	-0.566512	0.000113468	down		AT2G27228	Chr2	11651200	11651999
Chr5	19151400	19151999	898	1103	503	475	385	-0.490996	0.000672075	down		AT2G27230	Chr2	11651200	11651999
Chr5	19498600	19498999	731	893	402	377	210	-0.518459	0.000469496	down		AT2G27810	Chr2	11853800	11854599
Chr5	19702200	19702599	743	993	449	465	233	-0.376518	0.0172203	down		AT2G28620	Chr2	12266400	12267199
Chr5	19890800	19891599	1357	1655	888	780	463	-0.312654	0.0359327	down		AT2G28670	Chr2	12301000	12301599
Chr5	20093400	20093999	773	1039	371	355	304	-0.771438	6.53359e-08	down		AT2G29080	Chr2	12491800	12492199
Chr5	21590600	21591999	1426	1814	816	832	734	-0.429627	0.00247263	down		AT2G29720	Chr2	12701400	12701999
Chr5	21697200	21697599	568	638	258	255	246	-0.696383	8.8914e-06	down		AT2G32810	Chr2	13924400	13924799
Chr5	21723000	21723599	668	849	450	378	333	-0.331194	0.0423929	down		AT2G33410	Chr2	14155800	14155999
Chr5	22107600	22107999	726	927	472	441	230	-0.31214	0.047776	down		AT2G33860	Chr2	14328000	14328399
Chr5	2222000	2222399	816	950	404	411	230	-0.576286	0.000103848	down		AT2G34160	Chr2	14426600	14426799
Chr5	22324800	22325799	4605	5958	3104	2512	826	-0.368842	0.0125218	down		AT2G34300	Chr2	14476200	14476599
Chr5	22537600	22538999	1794	2163	1050	974	735	-0.427181	0.00184724	down		AT2G34655	Chr2	14596800	14597399
Chr5	22821600	22822999	2194	2620	1300	1285	912	-0.356632	0.0113049	down		AT2G35020	Chr2	14760400	14760599
Chr5	23095600	23096199	650	778	353	398	325	-0.384262	0.022533	down		AT2G35630	Chr2	14967000	14967399
Chr5	23329000	23329599	735	887	435	438	368	-0.352049	0.0257105	down		AT2G35630	Chr2	14977600	14978199
Chr5	23407600	23408199	1191	1495	550	601	322	-0.676797	2.05271e-06	down		AT2G36010	Chr2	15122600	15122999
Chr5	23787800	23788199	694	859	390	442	193	-0.35517	0.0350078	down		AT2G36570	Chr2	15335600	15336599
Chr5	23918600	23918999	524	599	271	243	241	-0.590743	0.000219846	down		AT2G37620	Chr2	15780000	15780399
Chr5	23944600	23945399	1080	1274	586	615	465	-0.430183	0.00426974	down		AT2G37660	Chr2	15796200	15796799
Chr5	24154400	24154999	807	970	418	363	328	-0.646934	8.46095e-06	down		AT2G38460	Chr2	16104000	16104399
Chr5	24227600	24227999	897	992	441	422	230	-0.595428	6.64169e-05	down		AT2G39180	Chr2	16345200	16345799
Chr5	24966400	24966999	891	1122	543	546	313	-0.341799	0.0256112	down		AT2G40230	Chr2	16803800	16804199
Chr5	25307600	25308799	1506	1936	893	868	646	-0.421281	0.00246479	down		AT2G40520	Chr2	16923200	16924199
Chr5	25511000	25511399	1141	1391	642	616	292	-0.467631	0.000924602	down		AT2G40750	Chr2	17002400	17002599
Chr5	26137000	26137599	1163	1524	629	646	348	-0.52769	0.000199404	down		AT2G41650	Chr2	17363400	17363599
Chr5	26143800	26144199	863	1048	573	450	266	-0.363577	0.0271531	down		AT2G41680	Chr2	17378400	17379399
Chr5	26146800	26147399	839	954	444	525	346	-0.347662	0.0494226	down		AT2G41790	Chr2	17430800	17431799
Chr5	26212800	26213799	1563	2112	983	871	612	-0.439518	0.00197276	down		AT2G41940	Chr2	17507600	17508199
Chr5	2896200	2896599	750	872	339	350	191	-0.695741	2.80288e-06	down		AT2G41960	Chr2	17516000	17516399
Chr5	30000	30599	997	1319	586	531	380	-0.505707	0.000410088	down		AT2G45160	Chr2	18619400	18620599
Chr5	3476200	3476799	784	934	419	489	396	-0.376807	0.0271775	down		AT2G45860	Chr2	18875800	18876199
Chr5	3704600	3705199	1024	1378	589	509	421	-0.582603	4.87217e-05	down		AT2G45870	Chr2	18875800	18876199
Chr5	4012200	4012799	1003	1289	628	524	420	-0.449567	0.00268609	down		AT2G46560	Chr2	19125200	19125399
Chr5	4736400	4736799	564	671	357	320	228	-0.328118	0.0484201	down		AT2G46630	Chr2	19145600	19146399
Chr5	5064800	5065599	1107	1315	626	610	433	-0.43057	0.00301085	down		AT2G46810	Chr2	19241400	19242199
Chr5	5236400	5237199	1137	1490	717	646	424	-0.40107	0.00579676	down		AT2G47590	Chr2	19521800	19522599
Chr5	5748000	5748399	672	942	457	415	207	-0.338204	0.038128	down		AT2G47820	Chr2	19587400	19587799
Chr5	5755000	5755599	821	1026	450	490	325	-0.429167	0.00608787	down		AT2G01760	Chr2	332600	333199
Chr5	5873200	5873599	538	657	232	218	200	-0.867509	1.01027e-08	down		AT2G07690	Chr2	3526600	3527199
Chr5	6158800	6159199	526	651	254	303	210	-0.533673	0.00173832	down		AT2G15290	Chr2	6644600	6645399
Chr5	7033600	7034199	809	989	518	449	354	-0.35465	0.0229938	down		AT2G15530	Chr2	6773800	6774999
Chr5	7057400	7057999	1390	1820	770	657	321	-0.624961	5.72937e-06	down		AT2G16270	Chr2	7046800	7047199
Chr5	712800	713399	712	890	429	387	329	-0.430901	0.00472991	down		AT2G17300	Chr2	7522800	7522999
Chr5	7174800	7175599	830	1062	393	405	408	-0.699532	1.0201e-06	down		AT2G17550	Chr2	7634400	7634599
Chr5	734600	735599	1018	1411	513	570	561	-0.61215	5.66282e-05	down		AT2G18890	Chr2	8183600	8183999
Chr5	7558200	7558999	983	1189	623	561	472	-0.335406	0.0270501	down		AT2G19380	Chr2	8385600	8385999
Chr5	7840600	7840999	572	713	324	344	248	-0.399323	0.0146879	down		AT2G19860	Chr2	8571600	8571999
Chr5	8006000	8006599	744	926	466	421	417	-0.37079	0.0163776	down		AT2G20190	Chr2	8718200	8718999
Chr5	8081600	8081999	715	771	395	356	192	-0.452145	0.00554954	down		AT2G20850	Chr2	8978400	8979199
Chr5	8938200	8938999	1116	1415	665	682	503	-0.36452	0.0145842	down		AT2G20950	Chr2	9005000	9005399
Chr5	9089400	9089799	758	783	381	405	286	-0.439485	0.010947	down		AT2G22530	Chr2	9577200	9577599
Chr5	9188800	9189399	1126	1363	744	614	373	-0.335701	0.0318722	down		AT2G23300	Chr2	9914600	9914799
Chr5	9222800	9223399	674	872	235	256	366	-1.1076	1.19359e-13	down		AT3G27200	Chr3	10043600	10044599
Chr5	9839800	9840399	837	1003	234	234	274	-1.43428	1.98729e-23	down		AT3G27960	Chr3	10381800	10382399
Chr5	9867200	9867999	818	1077	344	345	316	-0.912214	1.01499e-10	down		AT3G29360	Chr3	11267000	11267399
Chr1	10103600	10104199	661	898	683	647	446	0.319349	0.040535	up		AT3G04340	Chr3	1153800	1154599
Chr1	10212400	10212599	134	167	145	138	136	0.454058	0.0283607	up		AT3G04470	Chr3	1191000	1192399
Chr1	10312800	10313599	942	1095	997	807	567	0.359825	0.0236914	up		AT3G04790	Chr3	1313200	1313799
Chr1	10543200	10543799	605	763	638	577	473	0.371762	0.0145653	up		AT3G04980	Chr3	1381400	1381599
Chr1	1055200	1056199	760	945	809	782	640	0.443245	0.00189091	up		AT3G05050	Chr3	1411200	1411799
Chr1	10602800	10603199	433	453	415	392	312	0.397554	0.0207559	up		AT3G43590	Chr3	15511800	15512199
Chr1	10618800	10619599	698	824	719	661	521	0.397517	0.00776874	up		AT3G43610	Chr3	15523200	15523799
Chr1	10700600	10701199	607	696	606	545	355	0.357731	0.0234262	up		AT3G05690	Chr3	1678200	1678999
Chr1	10790600	10790999	471	633	598	478	348	0.507738	0.00149167	up		AT3G46130	Chr3	16945400	16945799
Chr1	10888200	10888999	965	1219	1020	901	602	0.35742	0.0144518	up		AT3G46790	Chr3	17233400	17233999
Chr1	1104400	1104999	514	635	553	521	330	0.444887	0.00313257	up		AT3G48110	Chr3	17763000	17763399
Chr1	11466200	11466599	431	526	473	372	296	0.359106	0.0378492	up		AT3G49750	Chr3	18450600	18451199
Chr1	11504800	11505199	403	533	450	366	175	0.346166	0.043777	up		AT3G50650	Chr3	18807400	18808199
Chr1	11847000	11847599	813	1050	889	720	450	0.331046	0.0384506	up		AT3G50790	Chr3	18882400	18882599
Chr1	12058200	12058799	468	584	486	426	352	0.335736	0.0389272	up		AT3G50800	Chr3	18882400	18882599
Chr1	12407400	12407999	582	725	615	539	351	0.361959	0.0198273	up		AT3G51150	Chr3	19004400	19005199
Chr1	12420800	12421399	644	787	691	578	389	0.366143	0.0199174	up		AT3G52900	Chr3	19613000	19613399
Chr1	12434000	12434399	444	506	442	388	287	0.341554	0.042125	up		AT3G53380	Chr3	19791000	19791599
Chr1	12505000	12505399	454	594	513	435	263	0.399418	0.013014	up		AT3G53670	Chr3	19890600	19891599
Chr1	12609600	12609999	423	435	476	355	264	0.480597	0.00958687	up		AT3G54180	Chr3	20060400	20060799
Chr1	12867800	12868799	723	977	824	693	660	0.381914	0.013941	up		AT3G54270	Chr3	20089000	20089399
Chr1	12997200	12997599	659	737	650	602	292	0.378365	0.0155078	up		AT3G54390	Chr3	20137800	20138399
Chr1	12999400	12999999	612	718	666	605	432	0.472855	0.00137869	up		AT3G55850	Chr3	20725200	20725999
Chr1	13125000	13125399	451	562	479	405	332	0.344603	0.0370623	up		AT3G55920	Chr3	20745400	20745799
Chr1	1326000	1326599	511	590	576	540	364	0.557555	0.000159465	up		AT3G56360	Chr3	20896600	20897199
Chr1	13295000	13295199	242	296	294	220	144	0.472872	0.010944	up		AT3G57050	Chr3	21115200	21115599
Chr1	13341400	13341799	220	312	278	290	271	0.645208	0.000139069	up		AT3G57060	Chr3	21115200	21115599
Chr1	13428600	13428999	408	467	393	383	236	0.36515	0.0287266	up		AT3G57460	Chr3	21264800	21265399
Chr1	13445800	13446199	350	417	420	367	236	0.576327	0.00023012	up		AT3G57560	Chr3	21311200	21312199
Chr1	13455200	13455599	476	532	491	404	271	0.362332	0.0341443	up		AT3G57570	Chr3	21311200	21312199
Chr1	13472800	13473199	412	432	457	374	262	0.507647	0.00304307	up		AT3G57780	Chr3	21401800	21402199
Chr1	13501400	13501999	708	874	727	661	431	0.352813	0.0189755	up		AT3G57830	Chr3	21421400	21421799
Chr1	13560400	13561199	815	1033	797	764	440	0.300725	0.0464205	up		AT3G59670	Chr3	22039400	22039999
Chr1	13689600	13689999	457	624	566	501	257	0.528563	0.000485152	up		AT3G61690	Chr3	22832400	22832799
Chr1	13781800	13782199	296	370	458	357	254	0.831304	1.59795e-07	up		AT3G07180	Chr3	2284600	2284999
Chr1	13947200	13947799	455	509	530	502	306	0.634757	2.13842e-05	up		AT3G62150	Chr3	23013200	23013599
Chr1	13948800	13949799	928	1133	936	860	553	0.342358	0.0193754	up		AT3G07810	Chr3	2492400	2492999
Chr1	14133600	14133999	308	395	351	305	200	0.443417	0.00808418	up		AT3G07960	Chr3	2534800	2535399
Chr1	14155200	14155799	587	740	591	562	422	0.340902	0.0273187	up		AT3G09780	Chr3	3002600	3003199
Chr1	14249000	14249399	366	409	455	362	201	0.609887	0.000208331	up		AT3G10960	Chr3	3425000	3425399
Chr1	1482600	1483399	682	981	756	662	516	0.321226	0.048859	up		AT3G11130	Chr3	3482200	3482599
Chr1	149400	149999	631	767	691	566	433	0.385372	0.0151956	up		AT3G11460	Chr3	3608400	3609199
Chr1	1500800	1501599	641	831	682	626	501	0.374488	0.012856	up		AT3G12560	Chr3	3983600	3983999
Chr1	15089000	15089199	188	195	166	189	95	0.427062	0.0383639	up		AT3G12950	Chr3	4133600	4134599
Chr1	15111600	15111799	194	200	225	170	141	0.534578	0.00727701	up		AT3G13480	Chr3	4393200	4393599
Chr1	15515600	15515999	318	420	402	359	233	0.589497	0.000162719	up		AT3G13490	Chr3	4398200	4398599
Chr1	15572000	15572599	539	649	562	497	324	0.373798	0.017101	up		AT3G13530	Chr3	4412400	4412599
Chr1	15573000	15573599	534	674	600	500	294	0.406455	0.0100779	up		AT3G13810	Chr3	4544800	4545199
Chr1	15574000	15574599	535	721	592	505	397	0.350854	0.0296676	up		AT3G14390	Chr3	4807400	4808199
Chr1	15667600	15668599	1135	1373	1185	1062	554	0.381195	0.00746234	up		AT3G14980	Chr3	5043000	5043599
Chr1	15691000	15691399	497	577	545	411	242	0.366607	0.0389875	up		AT3G15160	Chr3	5104800	5105199
Chr1	15704800	15705599	671	826	656	625	406	0.317376	0.038925	up		AT3G15410	Chr3	5202200	5202599
Chr1	15748400	15748799	342	463	387	381	228	0.480267	0.0028299	up		AT3G15470	Chr3	5219000	5219399
Chr1	15804400	15805599	847	1155	924	818	675	0.347136	0.0222495	up		AT3G15940	Chr3	5396600	5397199
Chr1	15927000	15927399	367	448	402	354	256	0.432247	0.007909	up		AT3G16290	Chr3	5523200	5524399
Chr1	16101600	16102199	553	621	595	498	344	0.431016	0.00747492	up		AT3G16480	Chr3	5601600	5602599
Chr1	16199600	16200199	500	694	605	541	353	0.489482	0.00131645	up		AT3G02650	Chr3	567600	567999
Chr1	16228400	16228999	542	719	586	558	329	0.406413	0.00767592	up		AT3G02760	Chr3	599400	600199
Chr1	16268000	16268599	482	666	543	499	366	0.409019	0.0093076	up		AT3G01180	Chr3	62400	62799
Chr1	16319200	16319599	421	560	486	443	255	0.467584	0.00254953	up		AT3G18710	Chr3	6434200	6434799
Chr1	16337400	16338199	827	970	809	768	570	0.350412	0.0192513	up		AT3G20260	Chr3	7066000	7066799
Chr1	1636600	1637199	618	851	750	573	381	0.394788	0.0206833	up		AT3G22600	Chr3	8006800	8007799
Chr1	16416600	16417199	524	573	502	517	386	0.429618	0.00830075	up		AT3G23610	Chr3	8479000	8479399
Chr1	1645600	1646599	1054	1399	1225	1113	767	0.477242	0.000533061	up		AT3G03580	Chr3	861600	862399
Chr1	16519600	16519799	391	464	552	516	210	0.86082	1.39262e-09	up		AT3G23890	Chr3	8624600	8624999
Chr1	16526600	16527199	879	1088	895	818	882	0.3423	0.0199352	up		AT3G24000	Chr3	8673200	8673599
Chr1	16530000	16530599	575	751	640	572	329	0.415205	0.00601833	up		AT3G25130	Chr3	9152400	9153599
Chr1	16631200	16632799	1094	1488	1307	1186	949	0.497642	0.000316286	up		AT3G26932	Chr3	9930600	9931199
Chr1	16649600	16649799	257	314	304	270	136	0.548628	0.0010173	up		AT4G02420	Chr4	1065600	1066599
Chr1	16809600	16810399	764	1011	771	782	478	0.35536	0.0191392	up		AT4G21390	Chr4	11395600	11395999
Chr1	16850800	16851199	339	387	348	295	265	0.361267	0.0402952	up		AT4G21720	Chr4	11542200	11542799
Chr1	16857000	16857999	968	1130	900	885	585	0.305921	0.0440156	up		AT4G21740	Chr4	11545800	11545999
Chr1	16926400	16926799	460	532	478	403	303	0.365316	0.0283833	up		AT4G21890	Chr4	11612200	11612799
Chr1	16982200	16982599	639	791	641	588	297	0.323384	0.0362647	up		AT4G23030	Chr4	12072600	12073599
Chr1	17055000	17056399	1188	1511	1204	1131	748	0.335149	0.0187486	up		AT4G25720	Chr4	13102800	13103999
Chr1	17180800	17181599	627	827	706	635	624	0.428952	0.00387837	up		AT4G28690	Chr4	14159400	14160399
Chr1	17341600	17342799	1765	2156	1815	1512	854	0.301842	0.0452229	up		AT4G29060	Chr4	14318200	14318799
Chr1	17432200	17432799	688	769	703	594	408	0.365819	0.0234887	up		AT4G29140	Chr4	14369000	14369799
Chr1	17497400	17497799	461	528	444	421	235	0.344572	0.0364447	up		AT4G30080	Chr4	14704600	14705399
Chr1	17534600	17534999	410	507	423	386	214	0.36111	0.0268543	up		AT4G31248	Chr4	15179000	15179399
Chr1	17590000	17590599	729	850	769	658	403	0.390629	0.0110816	up		AT4G31570	Chr4	15298600	15298999
Chr1	1768000	1768799	633	773	668	599	517	0.390473	0.00966374	up		AT4G32570	Chr4	15717600	15718599
Chr1	17721200	17721599	345	425	344	327	281	0.343777	0.043162	up		AT4G32710	Chr4	15780400	15781199
Chr1	17758000	17758199	166	219	196	181	148	0.514804	0.00608695	up		AT4G32920	Chr4	15895200	15896199
Chr1	17784200	17785199	1002	1172	1029	886	708	0.353668	0.0191251	up		AT4G33130	Chr4	15980200	15980599
Chr1	17892000	17892399	568	686	615	507	298	0.378088	0.018632	up		AT4G33530	Chr4	16126200	16126999
Chr1	17898200	17898799	462	583	483	454	341	0.386145	0.0139411	up		AT4G33625	Chr4	16155400	16155799
Chr1	1790000	1790799	933	1077	895	823	509	0.310592	0.0415745	up		AT4G34630	Chr4	16537000	16537599
Chr1	17905400	17905799	302	431	315	349	237	0.410359	0.0219144	up		AT4G34640	Chr4	16537000	16537599
Chr1	1802600	1803399	784	1047	813	789	482	0.355204	0.0175067	up		AT4G36120	Chr4	17094400	17095199
Chr1	18040400	18040999	510	678	583	470	401	0.370296	0.0255717	up		AT4G36420	Chr4	17203400	17203999
Chr1	18097800	18098399	521	674	555	511	406	0.379942	0.0140379	up		AT4G36520	Chr4	17232400	17233799
Chr1	18378800	18379599	706	864	770	721	560	0.467007	0.00106557	up		AT4G37170	Chr4	17500000	17500399
Chr1	18519200	18519999	1043	1329	1079	973	524	0.334442	0.021505	up		AT4G38550	Chr4	18027200	18027999
Chr1	18678000	18678399	320	320	336	312	252	0.548208	0.00172364	up		AT4G39740	Chr4	18437600	18438199
Chr1	18840000	18840399	333	403	443	378	230	0.697375	5.35321e-06	up		AT4G40065	Chr4	18574600	18575399
Chr1	18849600	18850199	557	807	642	550	350	0.356554	0.0315836	up		AT4G00820	Chr4	349000	349799
Chr1	19125800	19126399	658	742	666	587	428	0.375063	0.0172249	up		AT4G08390	Chr4	5315000	5315199
Chr1	19855400	19855799	490	592	505	431	235	0.330216	0.044739	up		AT4G08700	Chr4	5566200	5566799
Chr1	1995800	1996199	345	419	374	341	265	0.445307	0.00625885	up		AT4G09432	Chr4	5974800	5974999
Chr1	20027600	20027799	179	246	226	189	184	0.511542	0.00605576	up		AT4G09980	Chr4	6249000	6249399
Chr1	20042400	20042799	416	457	402	373	251	0.363368	0.0325354	up		AT4G10390	Chr4	6442800	6443399
Chr1	20098600	20098999	333	407	385	375	265	0.580742	0.00018684	up		AT4G10690	Chr4	6590000	6590799
Chr1	20103800	20104199	355	501	405	357	229	0.381212	0.0246888	up		AT4G12420	Chr4	7349800	7349999
Chr1	20189800	20190199	321	415	402	367	253	0.607649	8.27676e-05	up		AT4G14150	Chr4	8165000	8165199
Chr1	20202600	20202999	441	567	488	444	318	0.431033	0.00560292	up		AT4G01910	Chr4	825800	826399
Chr1	20271600	20272199	445	535	518	478	337	0.563723	0.000146689	up		AT4G14590	Chr4	8374600	8375599
Chr1	20289600	20289999	442	523	471	420	248	0.423778	0.00760537	up		AT4G14680	Chr4	8414600	8415399
Chr1	20310200	20310599	509	621	553	492	325	0.427757	0.00536172	up		AT4G14870	Chr4	8516600	8517599
Chr1	2035200	2035799	570	706	611	559	327	0.41681	0.00554954	up		AT4G15640	Chr4	8922600	8922999
Chr1	20389400	20389999	554	687	574	519	449	0.358613	0.0209409	up		AT4G02060	Chr4	901200	902199
Chr1	2054800	2055399	577	656	596	565	459	0.450283	0.00312751	up		AT4G16270	Chr4	9205400	9206199
Chr1	20659000	20659199	218	267	247	213	136	0.464594	0.0102045	up		AT4G17870	Chr4	9928600	9929199
Chr1	20805600	20805999	385	447	428	349	258	0.437783	0.00935549	up		AT5G04290	Chr5	1197800	1198199
Chr1	20966600	20966799	171	237	241	190	136	0.624628	0.000683317	up		AT5G35170	Chr5	13419200	13419799
Chr1	20967800	20968199	373	508	395	376	276	0.35569	0.0332125	up		AT5G36160	Chr5	14233800	14234999
Chr1	21467200	21467599	530	647	656	504	260	0.516952	0.00140352	up		AT5G04990	Chr5	1472800	1473399
Chr1	21601000	21601799	776	923	763	682	510	0.305131	0.048486	up		AT5G05010	Chr5	1477000	1477999
Chr1	21891200	21891599	487	708	598	508	270	0.439225	0.00712366	up		AT5G39500	Chr5	15813800	15814799
Chr1	21950600	21950799	159	195	179	167	119	0.509161	0.0081059	up		AT5G41160	Chr5	16477400	16478199
Chr1	22107800	22107999	194	218	200	188	142	0.451632	0.0176677	up		AT5G05620	Chr5	1678600	1679199
Chr1	2219200	2219599	368	468	398	351	294	0.38447	0.0200012	up		AT5G42100	Chr5	16831000	16831399
Chr1	22202000	22202599	768	924	852	707	454	0.420024	0.00583009	up		AT5G42440	Chr5	16973400	16973799
Chr1	22288600	22289199	464	617	523	475	337	0.430906	0.00543503	up		AT5G42780	Chr5	17154600	17155199
Chr1	22315800	22316199	401	493	406	401	221	0.395042	0.0145882	up		AT5G43020	Chr5	17256400	17256799
Chr1	22424400	22425599	1537	1852	1512	1365	818	0.303181	0.0355603	up		AT5G05830	Chr5	1755800	1756799
Chr1	22439400	22439599	200	251	243	199	158	0.512384	0.00507019	up		AT5G05840	Chr5	1757400	1757799
Chr1	2248000	2248399	388	513	465	409	298	0.501305	0.00132225	up		AT5G44870	Chr5	18115800	18116399
Chr1	22483200	22483599	494	582	543	437	331	0.401875	0.0152499	up		AT5G45170	Chr5	18272600	18272799
Chr1	2260800	2261599	693	923	751	669	468	0.359674	0.0181373	up		AT5G45480	Chr5	18426800	18427599
Chr1	22640600	22640999	266	341	288	291	215	0.477123	0.00499418	up		AT5G45500	Chr5	18432400	18432999
Chr1	22865600	22865999	389	483	406	403	328	0.435211	0.00641475	up		AT5G45510	Chr5	18445400	18445799
Chr1	23329600	23329999	369	438	478	399	235	0.658135	1.99865e-05	up		AT5G45590	Chr5	18486600	18487199
Chr1	23399400	23399799	338	478	459	351	272	0.536398	0.00186949	up		AT5G47320	Chr5	19202000	19202599
Chr1	23581600	23581999	443	574	505	392	295	0.360963	0.0373171	up		AT5G47570	Chr5	19294000	19295399
Chr1	23620000	23620999	822	1110	856	776	664	0.3041	0.047748	up		AT5G47850	Chr5	19380200	19381199
Chr1	23762600	23762999	358	468	394	343	307	0.379905	0.0230804	up		AT5G06390	Chr5	1952600	1953199
Chr1	23770200	23770599	439	521	494	431	228	0.485116	0.00183017	up		AT5G48360	Chr5	19597200	19597799
Chr1	23803800	23804199	444	587	536	389	281	0.385707	0.0342036	up		AT5G48520	Chr5	19666200	19666399
Chr1	23821400	23822399	1007	1220	992	929	619	0.327457	0.0251881	up		AT5G49950	Chr5	20320600	20320999
Chr1	23869200	23869599	390	471	492	406	312	0.599586	0.000116722	up		AT5G50010	Chr5	20349400	20349799
Chr1	23888800	23888999	276	325	322	273	143	0.52396	0.0019653	up		AT5G52547	Chr5	21326000	21326399
Chr1	23899600	23900799	1004	1283	1013	989	769	0.353148	0.014472	up		AT5G53020	Chr5	21500000	21501399
Chr1	23945200	23945599	484	572	536	480	296	0.483062	0.00152781	up		AT5G54440	Chr5	22104600	22105199
Chr1	2415000	2415599	774	1036	808	748	413	0.329125	0.0298205	up		AT5G55920	Chr5	22647600	22648599
Chr1	2430000	2430599	484	635	505	488	333	0.374007	0.0173851	up		AT5G56230	Chr5	22758600	22759399
Chr1	2434400	2434999	543	693	559	544	355	0.380569	0.013285	up		AT5G57080	Chr5	23098200	23098999
Chr1	2437200	2437999	720	850	729	638	478	0.338174	0.0292551	up		AT5G57350	Chr5	23234200	23234599
Chr1	24437800	24437999	211	282	239	216	168	0.429959	0.0184774	up		AT5G58160	Chr5	23536000	23536799
Chr1	2445800	2446399	727	951	745	675	449	0.304473	0.048054	up		AT5G58250	Chr5	23558800	23559799
Chr1	24477800	24477999	161	198	184	164	105	0.496847	0.0100117	up		AT5G58620	Chr5	23694000	23694399
Chr1	24849200	24849599	444	470	427	386	251	0.363324	0.0357675	up		AT5G59020	Chr5	23830200	23830599
Chr1	25022000	25022599	650	911	690	688	397	0.371656	0.0173796	up		AT5G59600	Chr5	24012400	24012799
Chr1	25072200	25072399	201	249	203	214	167	0.434077	0.0206924	up		AT5G59610	Chr5	24012400	24012799
Chr1	25153000	25153999	1099	1365	1204	989	706	0.37185	0.01406	up		AT5G59730	Chr5	24064000	24064599
Chr1	25159400	25160199	651	735	686	563	559	0.383692	0.018545	up		AT5G59732	Chr5	24064000	24064599
Chr1	25298800	25299199	512	528	476	454	334	0.369754	0.0321495	up		AT5G59740	Chr5	24073000	24073799
Chr1	25322600	25323199	486	572	461	479	315	0.370248	0.0230392	up		AT5G60280	Chr5	24260800	24261399
Chr1	25343800	25344199	631	745	724	589	355	0.469064	0.00256573	up		AT5G61340	Chr5	24662200	24662999
Chr1	25408000	25408999	885	1216	957	874	620	0.350499	0.0195968	up		AT5G61520	Chr5	24739400	24739999
Chr1	25422800	25423399	810	965	819	701	432	0.314282	0.0441679	up		AT5G64030	Chr5	25626800	25627599
Chr1	25430200	25430999	787	1024	817	739	515	0.326018	0.0306145	up		AT5G65120	Chr5	26013000	26013399
Chr1	25468200	25468599	375	479	410	346	240	0.366756	0.0295359	up		AT5G65683	Chr5	26261400	26261799
Chr1	25515600	25516199	482	585	488	435	375	0.331182	0.0411556	up		AT5G65920	Chr5	26364800	26365399
Chr1	25524600	25525399	659	758	729	601	523	0.443733	0.00463547	up		AT5G66320	Chr5	26497400	26497799
Chr1	25771200	25771999	846	979	883	728	542	0.355311	0.0250418	up		AT5G66680	Chr5	26619600	26620399
Chr1	25803400	25803799	531	667	576	487	332	0.369041	0.0205828	up		AT5G66940	Chr5	26728000	26728799
Chr1	25909000	25909799	631	814	741	635	489	0.472813	0.00141662	up		AT5G67020	Chr5	26748800	26749599
Chr1	25967600	25968399	777	880	740	698	453	0.331873	0.0327085	up		AT5G67070	Chr5	26767800	26768199
Chr1	26024600	26026199	1601	1954	1666	1401	968	0.325978	0.0280281	up		AT5G67350	Chr5	26868400	26868999
Chr1	2603000	2603599	803	1021	926	763	445	0.430791	0.00428957	up		AT5G67360	Chr5	26872200	26872799
Chr1	26063800	26065199	1108	1570	1230	1099	911	0.349501	0.0214865	up		AT5G01770	Chr5	294800	295199
Chr1	26147000	26147599	564	767	656	505	425	0.347941	0.044589	up		AT5G09870	Chr5	3074200	3074799
Chr1	2616800	2617199	307	363	383	331	272	0.630517	7.02944e-05	up		AT5G09950	Chr5	3102600	3103599
Chr1	26335200	26335599	477	562	485	482	351	0.436651	0.00515668	up		AT5G10600	Chr5	3351400	3351999
Chr1	2636000	2636599	545	634	582	513	417	0.430756	0.00538992	up		AT5G10690	Chr5	3376800	3377199
Chr1	26423800	26424199	561	717	655	537	283	0.441558	0.00475955	up		AT5G01900	Chr5	351600	352199
Chr1	26652000	26652399	439	540	447	397	324	0.327077	0.0472283	up		AT5G11460	Chr5	3658400	3658799
Chr1	26689400	26689999	572	656	627	562	329	0.490139	0.0011133	up		AT5G11510	Chr5	3680000	3680599
Chr1	26899800	26900599	679	925	779	631	477	0.360139	0.0268564	up		AT5G12370	Chr5	4004000	4004599
Chr1	2693800	2694199	351	415	373	320	298	0.394027	0.0201293	up		AT5G13260	Chr5	4245800	4246399
Chr1	26938400	26939199	732	911	734	665	509	0.310087	0.04261	up		AT5G13490	Chr5	4336400	4336799
Chr1	26965800	26966199	538	587	531	452	255	0.33801	0.0469448	up		AT5G02190	Chr5	435400	436599
Chr1	27148800	27148999	213	296	279	224	184	0.529058	0.00334324	up		AT5G14100	Chr5	4550600	4550999
Chr1	27239400	27239999	691	778	678	616	398	0.352479	0.0248345	up		AT5G14610	Chr5	4710600	4711799
Chr1	27250800	27251199	369	479	407	353	241	0.385868	0.020015	up		AT5G15680	Chr5	5101800	5102399
Chr1	27430600	27430999	378	476	441	384	314	0.492383	0.0017779	up		AT5G15710	Chr5	5122600	5123399
Chr1	27684600	27684799	260	290	297	237	154	0.492171	0.00649578	up		AT5G15830	Chr5	5168600	5168999
Chr1	27689000	27690199	1367	1679	1376	1218	827	0.308786	0.033818	up		AT5G02680	Chr5	607600	607999
Chr1	2770200	2771399	1246	1585	1309	1170	842	0.351681	0.0136176	up		AT5G18500	Chr5	6138800	6139399
Chr1	27734200	27734599	331	371	369	387	293	0.645476	5.53679e-05	up		AT5G19250	Chr5	6471800	6472999
Chr1	27779800	27780399	684	852	666	666	449	0.338186	0.027187	up		AT5G19260	Chr5	6479400	6480599
Chr1	27805200	27805599	394	505	509	416	293	0.583344	0.000185647	up		AT5G20635	Chr5	6981800	6981999
Chr1	27872400	27872999	689	875	687	678	377	0.348476	0.0213405	up		AT5G22010	Chr5	7281800	7282199
Chr1	27887400	27888199	668	783	659	596	522	0.328749	0.0351895	up		AT5G22320	Chr5	7388200	7388799
Chr1	27966400	27966799	463	531	460	409	300	0.343007	0.0385049	up		AT5G22620	Chr5	7519000	7519399
Chr1	27968400	27969199	642	738	662	574	462	0.377127	0.0163185	up		AT5G22930	Chr5	7668800	7669199
Chr1	28005000	28005199	200	266	252	213	147	0.541465	0.00242111	up		AT5G23280	Chr5	7842600	7843199
Chr1	28025600	28025999	295	374	322	322	231	0.489647	0.00299361	up		AT5G25620	Chr5	8935000	8935399
Chr1	28222800	28224399	1465	1792	1560	1327	1109	0.365447	0.0116633	up		AT5G27060	Chr5	9523800	9524999
Chr1	28234400	28234799	365	476	433	336	318	0.413387	0.0174143	up		AT5G27110	Chr5	9540000	9540399
Chr1	28242400	28242799	437	500	447	404	299	0.398214	0.0143678	up		AT5G03680	Chr5	959800	960599
Chr1	28247800	28248599	742	883	821	675	559	0.417916	0.00686619	up		AT5G41990	Chr5	16797000	16797799
Chr1	28279200	28279799	562	704	589	514	436	0.343026	0.0296787	up		AT1G64140	Chr1	23803800	23804199
Chr1	28297400	28297799	359	475	407	356	286	0.416769	0.0111925	up		AT3G53668	Chr3	19890600	19891599
Chr1	28583400	28583799	398	496	433	391	250	0.424553	0.00773037	up		AT5G50011	Chr5	20349400	20349799
Chr1	2860200	2860799	578	678	633	525	388	0.419547	0.00810285	up		AT5G50012	Chr5	20349400	20349799
Chr1	28608400	28608999	517	709	584	509	419	0.381886	0.0164721	up		AT5G64341	Chr5	25731400	25731999
Chr1	28655800	28656599	761	1037	771	749	535	0.307013	0.0477094	up		AT5G64342	Chr5	25731400	25731999
Chr1	28746800	28747399	511	651	608	561	396	0.55248	0.000132058	up		AT5G64343	Chr5	25731400	25731999
Chr1	28770800	28771599	737	862	698	718	529	0.364728	0.0182305	up		AT1G05140	Chr1	1482600	1483399
Chr1	28797200	28798599	1466	1857	1668	1430	909	0.440965	0.00151901	up		AT1G48410	Chr1	17892000	17892399
Chr1	28838000	28838999	1247	1508	1289	1119	760	0.344844	0.018282	up		AT1G50010	Chr1	18519200	18519999
Chr1	28873200	28874199	802	990	832	731	633	0.343657	0.0224685	up		AT1G56070	Chr1	20967800	20968199
Chr1	28906400	28906799	468	586	570	443	285	0.48266	0.00321268	up		AT1G07890	Chr1	2437200	2437999
Chr1	28947800	28948199	525	678	588	482	326	0.373731	0.0213314	up		AT1G70170	Chr1	26423800	26424199
Chr1	29069600	29069999	475	587	483	429	252	0.321706	0.0483523	up		AT1G79810	Chr1	30020200	30020599
Chr1	29085600	29086399	812	1019	826	729	549	0.306384	0.044723	up		AT1G09560	Chr1	3093800	3094199
Chr1	29254400	29254599	210	250	248	227	129	0.586693	0.000722129	up		AT1G10930	Chr1	3656000	3656199
Chr1	29392200	29393199	1224	1480	1200	1098	783	0.30535	0.0362775	up		AT2G38340	Chr2	16067600	16067999
Chr1	29394000	29394399	331	373	360	332	289	0.51221	0.00175854	up		AT2G39260	Chr2	16396200	16396599
Chr1	294800	295599	724	857	674	684	470	0.321294	0.0397063	up		AT2G41230	Chr2	17195200	17195599
Chr1	29557000	29558199	1156	1431	1220	1172	808	0.42959	0.00174535	up		AT2G46020	Chr2	18922800	18923399
Chr1	29589800	29590599	804	1019	857	752	516	0.362509	0.0149821	up		AT2G20990	Chr2	9015000	9016199
Chr1	29606800	29607199	345	414	351	334	268	0.392897	0.0185994	up		AT3G33520	Chr3	14094200	14094599
Chr1	29634600	29635199	645	805	822	710	336	0.620722	9.70378e-06	up		AT3G11170	Chr3	3499800	3500199
Chr1	29714800	29715199	373	468	387	386	327	0.422423	0.00907365	up		AT3G19040	Chr3	6569600	6569999
Chr1	29940800	29941599	755	910	767	664	492	0.32058	0.0389192	up		AT3G23600	Chr3	8474000	8474199
Chr1	29995600	29995999	458	499	439	425	274	0.387608	0.0199632	up		AT3G23700	Chr3	8534000	8534799
Chr1	30000800	30001199	389	486	382	389	214	0.361576	0.0295101	up		AT3G26650	Chr3	9796000	9796399
Chr1	30015800	30015999	221	295	288	204	141	0.473812	0.014755	up		AT4G24110	Chr4	12520200	12520599
Chr1	30020200	30020599	416	506	512	429	220	0.568937	0.00022207	up		AT4G34150	Chr4	16356400	16356799
Chr1	30057200	30057999	696	904	749	649	544	0.349368	0.0230804	up		AT4G35790	Chr4	16957800	16958199
Chr1	30094800	30095399	588	797	611	578	311	0.328113	0.0371206	up		AT4G35790	Chr4	16958800	16959399
Chr1	3011600	3011999	304	403	350	352	309	0.536895	0.000859101	up		AT4G35900	Chr4	17004800	17005199
Chr1	30324200	30324599	379	434	395	333	274	0.376952	0.0280693	up		AT4G37900	Chr4	17823200	17823599
Chr1	30397000	30397199	248	267	275	252	129	0.56841	0.00109106	up		AT4G38180	Chr4	17909200	17909999
Chr1	30416200	30416999	843	942	830	734	434	0.343497	0.0282381	up		AT4G10240	Chr4	6370000	6370999
Chr1	3054000	3054199	159	211	191	176	152	0.533538	0.00465711	up		AT4G01970	Chr4	855400	855999
Chr1	308000	308799	704	945	797	663	483	0.369958	0.0186664	up		AT5G41150	Chr5	16477400	16478199
Chr1	3093800	3094199	309	373	336	304	286	0.448876	0.00715209	up		AT5G42020	Chr5	16809400	16810199
Chr1	3162200	3163599	1286	1679	1432	1258	944	0.404348	0.00409788	up		AT5G53000	Chr5	21486400	21487599
Chr1	3218400	3219199	816	964	803	734	462	0.326889	0.0310644	up		AT5G14565	Chr5	4695400	4695999
Chr1	325600	326399	625	822	688	579	583	0.352738	0.0259032	up		AT5G15310	Chr5	4975000	4975999
Chr1	3285400	3286199	787	916	810	727	456	0.389376	0.00925418	up		AT1G30050	Chr1	10543200	10543799
Chr1	3325800	3326799	856	1035	895	759	597	0.345628	0.0240196	up		AT1G30150	Chr1	10602800	10603199
Chr1	3365200	3365999	613	760	628	597	532	0.378065	0.0122536	up		AT1G30190	Chr1	10618800	10619599
Chr1	3407000	3407399	434	551	485	439	257	0.451061	0.00356472	up		AT1G30340	Chr1	10700600	10701199
Chr1	3461000	3461599	478	566	475	455	398	0.373164	0.0191107	up		AT1G04180	Chr1	1104400	1104999
Chr1	3493000	3493399	414	562	486	426	325	0.448933	0.00472104	up		AT1G31993	Chr1	11504800	11505199
Chr1	3510400	3510799	436	484	447	392	259	0.401806	0.0156499	up		AT1G32750	Chr1	11847000	11847599
Chr1	3631000	3631399	428	523	434	386	223	0.326968	0.0485058	up		AT1G34090	Chr1	12407400	12407999
Chr1	3656000	3656199	208	269	261	213	171	0.533705	0.00291325	up		AT1G34140	Chr1	12434000	12434399
Chr1	3662000	3662399	293	368	355	265	272	0.447468	0.0137755	up		AT1G34490	Chr1	12609600	12609999
Chr1	3849200	3849399	234	288	276	227	125	0.486977	0.00627502	up		AT1G35370	Chr1	12999400	12999999
Chr1	4115000	4116199	896	1082	910	913	715	0.424024	0.00319369	up		AT1G35880	Chr1	13341400	13341799
Chr1	4251400	4252399	815	962	762	763	645	0.319545	0.0375575	up		AT1G35890	Chr1	13341400	13341799
Chr1	4305000	4306199	1089	1296	1132	987	845	0.36747	0.012215	up		AT1G36010	Chr1	13428600	13428999
Chr1	4345600	4346199	646	784	659	566	438	0.316271	0.0464707	up		AT1G36040	Chr1	13445800	13446199
Chr1	4348000	4348199	185	223	210	182	126	0.482727	0.0101742	up		AT1G36185	Chr1	13560400	13561199
Chr1	4433600	4433999	480	582	542	441	314	0.427199	0.00837243	up		AT1G36360	Chr1	13689600	13689999
Chr1	4631800	4632199	483	625	524	479	283	0.400982	0.00980462	up		AT1G36800	Chr1	13948800	13949799
Chr1	4951200	4952599	1533	1936	1474	1434	917	0.289841	0.0435382	up		AT1G37110	Chr1	14133600	14133999
Chr1	5047800	5048199	428	507	477	389	242	0.426881	0.00986744	up		AT1G37669	Chr1	14249000	14249399
Chr1	5199200	5200199	1068	1243	1048	1001	716	0.364625	0.0122941	up		AT1G41743	Chr1	15515600	15515999
Chr1	5307000	5307199	195	256	227	188	114	0.423732	0.0254734	up		AT1G41803	Chr1	15572000	15572599
Chr1	53800	54399	483	671	577	483	337	0.425102	0.00851031	up		AT1G41803	Chr1	15573000	15573599
Chr1	5398800	5399799	942	1147	1056	960	679	0.489205	0.000382769	up		AT1G41803	Chr1	15574000	15574599
Chr1	5444400	5445599	1059	1369	1055	998	758	0.303369	0.0387758	up		AT1G41896	Chr1	15667600	15668599
Chr1	5453400	5454199	609	785	707	621	511	0.473792	0.00126631	up		AT1G41930	Chr1	15691000	15691399
Chr1	5465200	5465799	525	652	627	562	435	0.556397	0.000121111	up		AT1G42040	Chr1	15704800	15705599
Chr1	5556800	5557799	839	1076	832	807	623	0.320703	0.0317955	up		AT1G42320	Chr1	15804400	15805599
Chr1	5709800	5710799	865	1082	878	817	597	0.34284	0.0194578	up		AT1G42470	Chr1	15927000	15927399
Chr1	5712200	5712599	443	508	478	436	246	0.480108	0.00212061	up		AT1G42780	Chr1	16101600	16102199
Chr1	583600	583999	335	526	409	345	264	0.363609	0.0499977	up		AT1G43060	Chr1	16199600	16200199
Chr1	5848800	5849599	686	870	739	683	438	0.41368	0.00466169	up		AT1G43120	Chr1	16228400	16228999
Chr1	5852000	5852999	1113	1447	1119	1034	710	0.295592	0.0445813	up		AT1G43171	Chr1	16268000	16268599
Chr1	6011200	6011599	453	635	502	468	256	0.384223	0.0171851	up		AT1G43270	Chr1	16319200	16319599
Chr1	6033600	6033799	248	257	255	217	128	0.434585	0.0218374	up		AT1G43300	Chr1	16337400	16338199
Chr1	6050200	6050799	577	799	619	555	340	0.31971	0.0471141	up		AT1G05530	Chr1	1636600	1637199
Chr1	6108200	6108799	640	766	688	591	312	0.40201	0.00877487	up		AT1G05560	Chr1	1645600	1646599
Chr1	6256000	6256799	687	722	673	689	547	0.483869	0.00242496	up		AT1G05562	Chr1	1645600	1646599
Chr1	6409000	6409199	150	188	205	171	138	0.695444	0.0001579	up		AT1G43745	Chr1	16519600	16519799
Chr1	6536000	6536599	509	588	519	510	396	0.446498	0.00391136	up		AT1G43755	Chr1	16526600	16527199
Chr1	6569000	6569599	597	590	534	532	361	0.373265	0.0357896	up		AT1G43760	Chr1	16530000	16530599
Chr1	6614000	6614599	664	776	672	574	381	0.328136	0.0401599	up		AT1G43763	Chr1	16530000	16530599
Chr1	6753800	6754199	389	479	497	407	345	0.598519	0.000123091	up		AT1G43883	Chr1	16631200	16632799
Chr1	7169000	7169599	809	957	836	694	406	0.33001	0.0374865	up		AT1G43895	Chr1	16649600	16649799
Chr1	7245000	7245599	550	679	595	493	367	0.364267	0.0238157	up		AT1G44180	Chr1	16809600	16810399
Chr1	726600	726999	494	552	561	419	315	0.437758	0.013393	up		AT1G44446	Chr1	16850800	16851199
Chr1	7475800	7475999	308	332	299	270	120	0.364754	0.0446051	up		AT1G44510	Chr1	16857000	16857999
Chr1	7593200	7593599	415	481	418	379	230	0.369085	0.0255849	up		AT1G44910	Chr1	16982200	16982599
Chr1	7642400	7642999	553	733	586	513	417	0.318803	0.0471859	up		AT1G45545	Chr1	17180800	17181599
Chr1	7840000	7840599	558	564	507	492	411	0.362195	0.0384935	up		AT1G47497	Chr1	17432200	17432799
Chr1	7850600	7850999	379	442	364	353	304	0.344066	0.0423725	up		AT1G47603	Chr1	17497400	17497799
Chr1	7892800	7893399	600	765	598	593	422	0.348376	0.02415	up		AT1G47660	Chr1	17534600	17534999
Chr1	7915800	7916199	345	450	481	413	267	0.71327	2.15498e-06	up		AT1G47770	Chr1	17590000	17590599
Chr1	7957400	7958599	1222	1485	1317	1114	897	0.383763	0.00874179	up		AT1G48145	Chr1	17784200	17785199
Chr1	7967400	7967999	582	758	635	633	394	0.466879	0.00157439	up		AT1G48150	Chr1	17784200	17785199
Chr1	7970400	7970799	361	478	401	349	236	0.383335	0.0216018	up		AT1G48770	Chr1	18040400	18040999
Chr1	7996600	7997399	741	1015	812	763	534	0.392132	0.0086175	up		AT1G50840	Chr1	18840000	18840399
Chr1	8015800	8016199	463	570	462	440	265	0.346609	0.0307937	up		AT1G50850	Chr1	18849600	18850199
Chr1	8070000	8070799	761	903	802	689	510	0.379493	0.0127194	up		AT1G53850	Chr1	20103800	20104199
Chr1	8312000	8312399	361	473	422	392	244	0.510428	0.00106381	up		AT1G54300	Chr1	20271600	20272199
Chr1	8549200	8549799	651	786	645	593	441	0.325288	0.0354606	up		AT1G54360	Chr1	20289600	20289999
Chr1	8558600	8558999	320	443	405	365	259	0.561191	0.000409183	up		AT1G59600	Chr1	21891200	21891599
Chr1	8614600	8615199	519	710	566	503	429	0.346487	0.0310077	up		AT1G59725	Chr1	21950600	21950799
Chr1	8748800	8749199	444	507	455	387	282	0.360326	0.0322576	up		AT1G07220	Chr1	2219200	2219599
Chr1	8914200	8914799	597	740	639	575	406	0.402457	0.00760063	up		AT1G07320	Chr1	2248000	2248399
Chr1	9022000	9022599	482	602	517	484	317	0.42792	0.0052055	up		AT1G63600	Chr1	23581600	23581999
Chr1	9024400	9025199	719	877	752	656	501	0.35922	0.0182516	up		AT1G64050	Chr1	23762600	23762999
Chr1	9089800	9090599	728	998	789	740	516	0.374234	0.0130749	up		AT1G64180	Chr1	23821400	23822399
Chr1	9142600	9143399	711	857	726	660	445	0.361984	0.016165	up		AT1G64320	Chr1	23869200	23869599
Chr1	917200	917799	540	649	542	494	375	0.341292	0.0308992	up		AT1G07800	Chr1	2415000	2415599
Chr1	9210600	9211199	556	706	588	515	427	0.348507	0.0267489	up		AT1G07810	Chr1	2415000	2415599
Chr1	9271800	9272199	409	520	468	388	209	0.423949	0.00945687	up		AT1G07860	Chr1	2430000	2430599
Chr1	9285600	9285999	351	460	409	335	284	0.419219	0.0130824	up		AT1G07885	Chr1	2437200	2437999
Chr1	9343600	9343999	484	599	481	465	318	0.347672	0.0290084	up		AT1G65810	Chr1	24477800	24477999
Chr1	9427600	9427999	481	547	480	418	298	0.340909	0.0408305	up		AT1G67240	Chr1	25159400	25160199
Chr1	9446400	9446799	463	647	517	464	279	0.370851	0.0223767	up		AT1G67560	Chr1	25322600	25323199
Chr1	9487200	9488199	984	1162	929	906	731	0.31379	0.0362149	up		AT1G67626	Chr1	25343800	25344199
Chr1	9495400	9495599	177	214	192	182	155	0.477528	0.0116456	up		AT1G67770	Chr1	25408000	25408999
Chr1	9534600	9534999	413	522	441	402	223	0.393709	0.0138945	up		AT1G68070	Chr1	25515600	25516199
Chr1	9539000	9539599	636	802	721	553	411	0.365269	0.0303382	up		AT1G69070	Chr1	25967600	25968399
Chr1	9728800	9729399	639	726	630	559	360	0.336621	0.0351791	up		AT1G69220	Chr1	26024600	26026199
Chr1	9913000	9913199	208	263	253	224	119	0.561034	0.00129255	up		AT1G69920	Chr1	26335200	26335599
Chr1	9933800	9934399	510	576	516	501	366	0.442513	0.00470879	up		AT1G08360	Chr1	2636000	2636599
Chr1	9966600	9967599	1070	1384	1212	1049	759	0.425629	0.00282084	up		AT1G70770	Chr1	26689400	26689999
Chr1	9982800	9983199	463	583	501	429	244	0.372352	0.0210077	up		AT1G71370	Chr1	26899800	26900599
Chr2	10101200	10102399	1036	1352	1202	1118	713	0.504068	0.000193116	up		AT1G71380	Chr1	26899800	26900599
Chr2	10281800	10282199	380	458	400	363	286	0.405106	0.0129594	up		AT1G08510	Chr1	2693800	2694199
Chr2	10304200	10304599	430	505	454	410	237	0.424734	0.00773326	up		AT1G71520	Chr1	26938400	26939199
Chr2	10421600	10422599	962	1201	1046	854	696	0.353218	0.0226061	up		AT1G71695	Chr1	26965800	26966199
Chr2	10577000	10577399	275	341	350	327	210	0.678705	1.44288e-05	up		AT1G72350	Chr1	27239400	27239999
Chr2	10631200	10631399	195	246	234	186	122	0.470973	0.0125264	up		AT1G72390	Chr1	27250800	27251199
Chr2	10684000	10685599	1641	2103	1676	1588	954	0.346969	0.0122011	up		AT1G72890	Chr1	27430600	27430999
Chr2	10733000	10733199	201	189	211	194	137	0.583537	0.0027915	up		AT1G73960	Chr1	27805200	27805599
Chr2	10814400	10814799	430	558	515	433	253	0.483808	0.00206768	up		AT1G74130	Chr1	27872400	27872999
Chr2	10882200	10882599	293	369	397	353	251	0.722609	2.43888e-06	up		AT1G74410	Chr1	27966400	27966799
Chr2	10987800	10988599	720	891	761	650	547	0.349377	0.0234919	up		AT1G74420	Chr1	27968400	27969199
Chr2	11030000	11030799	670	831	783	648	524	0.471297	0.00175086	up		AT1G75200	Chr1	28222800	28224399
Chr2	11130200	11131199	762	989	764	778	584	0.3635	0.0158785	up		AT1G76660	Chr1	28770800	28771599
Chr2	11245800	11246199	561	678	577	492	301	0.326305	0.0436158	up		AT1G76890	Chr1	28873200	28874199
Chr2	11254600	11255199	564	724	603	567	414	0.406005	0.00706419	up		AT1G76892	Chr1	28873200	28874199
Chr2	11318400	11318999	670	830	699	631	395	0.368139	0.0144991	up		AT1G77020	Chr1	28947800	28948199
Chr2	11651200	11651999	739	893	780	702	532	0.400851	0.00654377	up		AT1G77030	Chr1	28947800	28948199
Chr2	11853800	11854599	840	1011	827	786	496	0.342021	0.0211853	up		AT1G77040	Chr1	28947800	28948199
Chr2	1188200	1188599	566	699	616	554	303	0.428833	0.00431434	up		AT1G77340	Chr1	29069600	29069999
Chr2	11900000	11900599	547	592	577	487	343	0.433637	0.00833076	up		AT1G77800	Chr1	29254400	29254599
Chr2	12034200	12034599	349	454	376	330	281	0.358486	0.0342036	up		AT1G78110	Chr1	29392200	29393199
Chr2	12131600	12132199	680	828	671	632	439	0.330476	0.0304768	up		AT1G78120	Chr1	29394000	29394399
Chr2	12177400	12177799	364	445	385	370	294	0.442384	0.00598127	up		AT1G78720	Chr1	29606800	29607199
Chr2	12266400	12267199	771	924	746	711	432	0.322094	0.0337479	up		AT1G79580	Chr1	29940800	29941599
Chr2	12301000	12301599	519	663	523	508	376	0.347637	0.0270747	up		AT1G79780	Chr1	30015800	30015999
Chr2	12470400	12470799	505	615	518	481	270	0.376226	0.0160376	up		AT1G79915	Chr1	30057200	30057999
Chr2	12491800	12492199	322	388	356	326	222	0.482569	0.00304388	up		AT1G80000	Chr1	30094800	30095399
Chr2	12644800	12645599	638	811	772	593	526	0.454332	0.00519688	up		AT1G01880	Chr1	308000	308799
Chr2	12701400	12701999	439	567	472	434	315	0.393515	0.0128244	up		AT1G09900	Chr1	3218400	3219199
Chr2	12706600	12706999	392	516	396	386	240	0.33098	0.0473019	up		AT1G10060	Chr1	3285400	3286199
Chr2	12737200	12737799	615	734	585	579	410	0.328043	0.0367701	up		AT1G10270	Chr1	3365200	3365999
Chr2	1287800	1288199	395	576	452	404	206	0.369611	0.0296381	up		AT1G10620	Chr1	3510400	3510799
Chr2	12903800	12904199	407	476	430	403	253	0.454967	0.00411203	up		AT1G10950	Chr1	3662000	3662399
Chr2	13026000	13026799	611	768	661	587	591	0.398346	0.00831323	up		AT1G12990	Chr1	4433600	4433999
Chr2	13626600	13627199	469	604	460	462	379	0.326993	0.0445634	up		AT1G01110	Chr1	53800	54399
Chr2	13854600	13855199	553	641	559	484	371	0.341782	0.0350433	up		AT1G15810	Chr1	5444400	5445599
Chr2	13924400	13924799	427	576	432	447	262	0.35867	0.0303061	up		AT1G15850	Chr1	5453400	5454199
Chr2	14135400	14135799	432	584	537	419	282	0.456958	0.00644108	up		AT1G16705	Chr1	5712200	5712599
Chr2	14155800	14155999	180	203	223	194	125	0.66027	0.000243638	up		AT1G17110	Chr1	5848800	5849599
Chr2	14158600	14158799	166	241	208	189	142	0.51337	0.0064357	up		AT1G17495	Chr1	6011200	6011599
Chr2	14165400	14167999	2194	2807	2276	1954	1749	0.301312	0.0377594	up		AT1G17540	Chr1	6033600	6033799
Chr2	14222600	14222999	371	555	448	375	257	0.381923	0.0306209	up		AT1G17545	Chr1	6033600	6033799
Chr2	14328000	14328399	453	593	651	497	326	0.676531	1.85728e-05	up		AT1G17550	Chr1	6033600	6033799
Chr2	14331400	14331599	250	273	252	219	185	0.38408	0.040811	up		AT1G17590	Chr1	6050200	6050799
Chr2	14409000	14409399	347	426	396	342	245	0.473865	0.00351018	up		AT1G17750	Chr1	6108200	6108799
Chr2	14426600	14426799	136	176	168	165	119	0.638795	0.000790492	up		AT1G18180	Chr1	6256000	6256799
Chr2	14476200	14476599	474	576	557	422	297	0.436554	0.0105709	up		AT1G18610	Chr1	6409000	6409199
Chr2	14596800	14597399	752	925	773	662	386	0.315415	0.0430751	up		AT1G18620	Chr1	6409000	6409199
Chr2	14702400	14702799	388	447	454	410	216	0.586919	0.000134207	up		AT1G18910	Chr1	6536000	6536599
Chr2	14750200	14750799	544	726	593	550	417	0.394844	0.0100798	up		AT1G19025	Chr1	6569000	6569599
Chr2	14760400	14760599	232	295	302	250	134	0.608978	0.000329821	up		AT1G20680	Chr1	7169000	7169599
Chr2	14967000	14967399	366	512	401	378	266	0.376933	0.0241949	up		AT1G21740	Chr1	7642400	7642999
Chr2	14977600	14978199	568	795	627	572	351	0.364771	0.0210154	up		AT1G22530	Chr1	7957400	7958599
Chr2	15122600	15122999	499	557	455	479	213	0.360606	0.0320733	up		AT1G22560	Chr1	7970400	7970799
Chr2	15288000	15288999	1298	1618	1308	1173	675	0.308778	0.0330813	up		AT1G22651	Chr1	8015800	8016199
Chr2	15335600	15336599	755	881	816	728	673	0.453933	0.00190468	up		AT1G24150	Chr1	8549200	8549799
Chr2	1534600	1535199	749	861	786	682	451	0.402713	0.00831184	up		AT1G24290	Chr1	8614600	8615199
Chr2	15360200	15361399	1455	1900	1540	1374	866	0.341796	0.0164712	up		AT1G24300	Chr1	8614600	8615199
Chr2	15410600	15411199	540	741	614	546	403	0.404803	0.00934965	up		AT1G25410	Chr1	8914200	8914799
Chr2	15455400	15455999	523	692	555	483	376	0.31812	0.0499357	up		AT1G26090	Chr1	9022000	9022599
Chr2	1549400	1549599	234	300	250	239	116	0.417427	0.0195001	up		AT1G26100	Chr1	9024400	9025199
Chr2	15558000	15558599	532	654	519	512	369	0.340635	0.031216	up		AT1G26110	Chr1	9024400	9025199
Chr2	15780000	15780399	315	340	328	318	216	0.515469	0.00228585	up		AT1G26270	Chr1	9089800	9090599
Chr2	15781400	15782199	661	852	748	622	544	0.39961	0.00986168	up		AT1G26430	Chr1	9142600	9143399
Chr2	15796200	15796799	495	598	552	443	356	0.402697	0.0144843	up		AT1G26780	Chr1	9271800	9272199
Chr2	15860600	15861399	707	900	691	674	477	0.309306	0.0438347	up		AT1G26940	Chr1	9343600	9343999
Chr2	15929400	15930599	1209	1613	1349	1139	817	0.363854	0.0147622	up		AT1G27140	Chr1	9427600	9427999
Chr2	16067600	16067999	352	368	380	326	293	0.502979	0.00349595	up		AT1G27340	Chr1	9495400	9495599
Chr2	16104000	16104399	389	458	460	398	273	0.55684	0.0003464	up		AT1G27461	Chr1	9539000	9539599
Chr2	16114200	16115399	1025	1303	1146	970	728	0.404421	0.00568859	up		AT1G27920	Chr1	9728800	9729399
Chr2	16143200	16143999	672	828	720	641	510	0.400785	0.00717779	up		AT1G27921	Chr1	9728800	9729399
Chr2	16345200	16345799	562	705	637	539	362	0.433889	0.0047717	up		AT1G28310	Chr1	9913000	9913199
Chr2	16396200	16396599	401	477	447	449	250	0.570401	0.000185174	up		AT1G28390	Chr1	9966600	9967599
Chr2	16519000	16519399	327	445	379	323	275	0.409181	0.0159836	up		AT2G24530	Chr2	10421600	10422599
Chr2	16537800	16538199	368	467	365	369	271	0.358897	0.0321944	up		AT2G24830	Chr2	10577000	10577399
Chr2	16567600	16567799	197	235	240	231	157	0.66588	0.00010455	up		AT2G25010	Chr2	10631200	10631399
Chr2	16601800	16602199	380	480	418	342	256	0.363145	0.0336671	up		AT2G25410	Chr2	10814400	10814799
Chr2	16675400	16675799	430	624	522	506	305	0.516589	0.000986278	up		AT2G25560	Chr2	10882200	10882599
Chr2	16679600	16679999	358	484	424	395	256	0.507331	0.00124449	up		AT2G25850	Chr2	11030000	11030799
Chr2	16803800	16804199	400	452	383	381	221	0.380664	0.0234195	up		AT2G25870	Chr2	11030000	11030799
Chr2	16850000	16850399	662	805	711	670	339	0.454051	0.00172364	up		AT2G26135	Chr2	11130200	11131199
Chr2	16852200	16852799	741	808	715	647	481	0.347496	0.0301313	up		AT2G26455	Chr2	11254600	11255199
Chr2	16865000	16865399	477	580	565	473	304	0.513198	0.000855196	up		AT2G26610	Chr2	11318400	11318999
Chr2	16923200	16924199	841	1016	883	779	659	0.379445	0.0102417	up		AT2G28220	Chr2	12034200	12034599
Chr2	17002400	17002599	271	286	283	220	145	0.384056	0.0486432	up		AT2G28480	Chr2	12177400	12177799
Chr2	17195200	17195599	377	411	363	356	276	0.403526	0.0181373	up		AT2G28671	Chr2	12301000	12301599
Chr2	17363400	17363599	266	361	336	281	128	0.522479	0.00206113	up		AT2G33350	Chr2	14135400	14135799
Chr2	17378400	17379399	733	855	831	731	629	0.513353	0.000375375	up		AT2G33420	Chr2	14158600	14158799
Chr2	17422000	17422599	838	1023	827	747	406	0.298999	0.0492082	up		AT2G33435	Chr2	14165400	14167999
Chr2	17430800	17431799	800	1073	812	804	582	0.335715	0.0269145	up		AT2G33580	Chr2	14222600	14222999
Chr2	17507600	17508199	697	902	785	640	456	0.376561	0.017108	up		AT2G34100	Chr2	14409000	14409399
Chr2	17516000	17516399	424	477	468	365	285	0.420289	0.0159209	up		AT2G34130	Chr2	14409000	14409399
Chr2	17602600	17602999	379	518	479	373	254	0.4711	0.0056325	up		AT2G34835	Chr2	14702400	14702799
Chr2	1761000	1761599	692	819	688	654	391	0.368447	0.0147233	up		AT2G34990	Chr2	14750200	14750799
Chr2	17704800	17705799	1064	1149	1071	923	697	0.380537	0.0157092	up		AT2G36420	Chr2	15288000	15288999
Chr2	17966200	17966399	309	368	334	297	186	0.438091	0.00941906	up		AT2G04410	Chr2	1534600	1535199
Chr2	1831800	1832599	751	934	801	684	395	0.358636	0.0188703	up		AT2G04420	Chr2	1534600	1535199
Chr2	18335800	18336199	397	519	467	378	263	0.426902	0.0102603	up		AT2G36650	Chr2	15360200	15361399
Chr2	18380400	18380999	539	692	556	516	356	0.344886	0.0273201	up		AT2G37880	Chr2	15860600	15861399
Chr2	18462000	18462399	385	435	516	358	245	0.62344	0.000572542	up		AT2G38070	Chr2	15929400	15930599
Chr2	18551800	18552399	489	602	529	438	417	0.365907	0.0254164	up		AT2G38350	Chr2	16067600	16067999
Chr2	18619400	18620599	1089	1381	1247	1061	681	0.444216	0.00182874	up		AT2G38590	Chr2	16143200	16143999
Chr2	18829800	18830199	413	499	434	374	264	0.364971	0.027578	up		AT2G39590	Chr2	16519000	16519399
Chr2	18875800	18876199	410	531	430	385	289	0.336912	0.041424	up		AT2G39600	Chr2	16519000	16519399
Chr2	18922800	18923399	462	623	589	482	378	0.526634	0.000771556	up		AT2G39620	Chr2	16519000	16519399
Chr2	19125200	19125399	183	274	221	203	131	0.443113	0.0200017	up		AT2G39675	Chr2	16537800	16538199
Chr2	19145600	19146399	998	1228	1016	908	568	0.330581	0.0246439	up		AT2G40380	Chr2	16865000	16865399
Chr2	19200400	19200799	300	415	394	352	199	0.608976	0.000120069	up		AT2G41760	Chr2	17422000	17422599
Chr2	19241400	19242199	756	978	782	739	516	0.356237	0.0163036	up		AT2G04990	Chr2	1761000	1761599
Chr2	1931800	1932399	555	721	565	535	334	0.331366	0.0344661	up		AT2G42520	Chr2	17704800	17705799
Chr2	19521800	19522599	779	1074	815	799	567	0.351116	0.0213918	up		AT2G43230	Chr2	17966200	17966399
Chr2	19576200	19576799	538	672	557	512	343	0.363802	0.0189755	up		AT2G05110	Chr2	1831800	1832599
Chr2	19587400	19587799	345	409	362	326	272	0.407267	0.0147377	up		AT2G44790	Chr2	18462000	18462399
Chr2	19665000	19665399	380	499	443	393	234	0.472562	0.00278653	up		AT2G45161	Chr2	18619400	18620599
Chr2	2375800	2376399	558	673	586	565	355	0.444192	0.00300702	up		AT2G45700	Chr2	18829800	18830199
Chr2	2400000	2400399	456	506	434	429	268	0.379876	0.0220135	up		AT2G46000	Chr2	18922800	18923399
Chr2	2426200	2426599	502	610	509	474	298	0.363189	0.0210294	up		AT2G46730	Chr2	19200400	19200799
Chr2	2500400	2500999	560	582	561	463	335	0.371331	0.0346274	up		AT2G48075	Chr2	19665000	19665399
Chr2	2508600	2509399	580	776	706	652	407	0.549106	0.000126346	up		AT2G48080	Chr2	19665000	19665399
Chr2	2532600	2533199	543	697	563	533	289	0.366631	0.0175208	up		AT2G06100	Chr2	2375800	2376399
Chr2	2634600	2634799	298	391	358	299	117	0.475301	0.00480326	up		AT2G06200	Chr2	2426200	2426599
Chr2	2661200	2661599	334	375	368	303	244	0.455504	0.00833494	up		AT2G06350	Chr2	2508600	2509399
Chr2	2725600	2726199	483	590	498	480	358	0.408217	0.0085194	up		AT2G06410	Chr2	2532600	2533199
Chr2	2743200	2743599	374	531	446	354	285	0.370096	0.0371868	up		AT2G06590	Chr2	2634600	2634799
Chr2	2784400	2784999	558	731	610	579	337	0.429562	0.00413057	up		AT2G06667	Chr2	2661200	2661599
Chr2	3071400	3072799	1293	1576	1299	1147	702	0.309819	0.0344176	up		AT2G06670	Chr2	2661200	2661599
Chr2	3086000	3086599	1013	1207	1174	983	557	0.495864	0.000573725	up		AT2G06830	Chr2	2743200	2743599
Chr2	3088400	3088999	1019	1258	997	1011	622	0.362083	0.0131355	up		AT2G06880	Chr2	2784400	2784999
Chr2	3120200	3120599	322	376	364	291	217	0.445054	0.0106821	up		AT2G07395	Chr2	3071400	3072799
Chr2	332600	333199	582	741	635	542	331	0.373817	0.0167553	up		AT2G07420	Chr2	3086000	3086599
Chr2	347000	347799	903	1179	946	823	617	0.309513	0.0422425	up		AT2G07420	Chr2	3088400	3088999
Chr2	3526600	3527199	567	804	677	535	405	0.370465	0.0301246	up		AT2G07490	Chr2	3120200	3120599
Chr2	3566600	3567799	997	1261	1098	943	751	0.396325	0.00644502	up		AT2G01755	Chr2	332600	333199
Chr2	3569600	3571199	1569	1830	1620	1351	998	0.341316	0.024121	up		AT2G01810	Chr2	347000	347799
Chr2	3821400	3821999	382	460	406	436	372	0.542863	0.000642229	up		AT2G07730	Chr2	3566600	3567799
Chr2	3834800	3834999	212	262	237	213	117	0.466946	0.00972528	up		AT2G07730	Chr2	3569600	3571199
Chr2	3950000	3950399	366	457	424	363	228	0.476969	0.00298432	up		AT2G07740	Chr2	3569600	3571199
Chr2	4259000	4259999	895	1074	953	860	570	0.420331	0.00334324	up		AT2G10080	Chr2	3821400	3821999
Chr2	434400	434599	108	119	103	129	161	0.572689	0.0111411	up		AT2G10280	Chr2	3950000	3950399
Chr2	4401000	4402199	987	1267	1046	889	742	0.322798	0.0336194	up		AT2G10820	Chr2	4259000	4259999
Chr2	4406600	4406999	393	555	451	418	307	0.424447	0.00900143	up		AT2G11100	Chr2	4401000	4402199
Chr2	4496400	4496799	325	394	360	349	283	0.521552	0.00109637	up		AT2G11110	Chr2	4406600	4406999
Chr2	4722400	4722999	483	666	628	539	357	0.569978	0.00015486	up		AT2G11310	Chr2	4496400	4496799
Chr2	4976200	4976799	434	533	479	497	344	0.556852	0.000245999	up		AT2G11770	Chr2	4722400	4722999
Chr2	4988200	4988599	297	406	357	342	221	0.539843	0.00081474	up		AT2G12360	Chr2	4976200	4976799
Chr2	5108400	5108599	140	206	267	237	134	1.09165	1.30972e-10	up		AT2G12380	Chr2	4988200	4988599
Chr2	5128800	5129399	565	651	544	529	321	0.357881	0.0239595	up		AT2G12570	Chr2	5128800	5129399
Chr2	5252400	5252799	371	461	390	371	191	0.41412	0.0104885	up		AT2G12800	Chr2	5252400	5252799
Chr2	5303600	5303999	270	342	312	238	208	0.386681	0.0377312	up		AT2G12920	Chr2	5303600	5303999
Chr2	5340000	5340599	504	681	568	490	406	0.382876	0.0164018	up		AT2G12980	Chr2	5340000	5340599
Chr2	5410600	5410999	363	435	378	344	219	0.39574	0.0167338	up		AT2G13116	Chr2	5410600	5410999
Chr2	547600	547999	324	468	387	340	262	0.426664	0.0123454	up		AT2G13310	Chr2	5526600	5526999
Chr2	5493800	5493999	168	220	201	187	139	0.544868	0.00318691	up		AT2G13320	Chr2	5526600	5526999
Chr2	5505400	5505599	258	294	326	257	143	0.614458	0.000383765	up		AT2G13990	Chr2	5878200	5878799
Chr2	5526600	5526999	384	509	410	390	345	0.387866	0.0171149	up		AT2G14030	Chr2	5897800	5898399
Chr2	561200	561999	780	1022	810	744	542	0.332083	0.0271088	up		AT2G14288	Chr2	6056400	6056799
Chr2	5615200	5615399	210	267	225	203	151	0.386915	0.0384198	up		AT2G14940	Chr2	6435200	6436199
Chr2	5861800	5862399	884	1019	925	833	444	0.422278	0.0039052	up		AT2G15292	Chr2	6644600	6645399
Chr2	5878200	5878799	533	634	585	504	384	0.438617	0.00460332	up		AT2G15420	Chr2	6724000	6724999
Chr2	5897800	5898399	568	743	622	562	298	0.398172	0.0088867	up		AT2G15420	Chr2	6727600	6728199
Chr2	6056400	6056799	333	475	378	325	273	0.348401	0.0478656	up		AT2G02540	Chr2	684400	684999
Chr2	6365200	6365599	398	460	429	401	294	0.490495	0.00185475	up		AT2G02630	Chr2	723400	724999
Chr2	6435200	6436199	919	1111	889	827	532	0.298036	0.0471143	up		AT2G16810	Chr2	7287800	7288399
Chr2	6644600	6645399	804	1026	881	743	615	0.370121	0.014932	up		AT2G17110	Chr2	7445000	7445599
Chr2	6647600	6647999	431	557	543	435	281	0.52771	0.000906014	up		AT2G17600	Chr2	7655000	7655399
Chr2	6724000	6724999	926	1205	1059	875	627	0.403427	0.00752832	up		AT2G18820	Chr2	8151800	8152199
Chr2	6727600	6728199	614	747	657	587	376	0.410684	0.00632602	up		AT2G02835	Chr2	821000	822199
Chr2	6733200	6734599	1034	1296	1040	1025	829	0.369805	0.00983644	up		AT2G02840	Chr2	821000	822199
Chr2	6773800	6774999	1239	1468	1233	1107	673	0.32806	0.0247615	up		AT2G20380	Chr2	8794800	8795399
Chr2	684400	684999	749	1062	843	705	343	0.32311	0.0487951	up		AT2G20470	Chr2	8829400	8829799
Chr2	7046800	7047199	370	522	442	393	233	0.453922	0.00534668	up		AT2G20810	Chr2	8958200	8959199
Chr2	7151600	7152799	980	1241	1061	1031	787	0.458118	0.000896964	up		AT2G20815	Chr2	8958200	8959199
Chr2	723400	724999	1257	1613	1240	1217	928	0.321465	0.0256856	up		AT2G21270	Chr2	9108400	9109199
Chr2	7287800	7288399	470	628	502	477	408	0.381688	0.0155667	up		AT2G21310	Chr2	9123200	9123799
Chr2	7445000	7445599	490	587	567	489	375	0.510536	0.000769135	up		AT2G23118	Chr2	9841800	9842199
Chr2	7522800	7522999	207	230	198	225	161	0.492741	0.0100117	up		AT2G23290	Chr2	9904800	9905399
Chr2	7559800	7560199	383	467	380	370	248	0.361495	0.0290615	up		AT3G27670	Chr3	10245600	10245999
Chr2	7598200	7598599	608	684	601	543	277	0.359995	0.0238154	up		AT3G03970	Chr3	1028400	1029399
Chr2	7634400	7634599	215	243	224	195	120	0.40891	0.0311003	up		AT3G28280	Chr3	10540800	10541599
Chr2	7655000	7655399	427	494	405	406	242	0.35587	0.0325682	up		AT3G28705	Chr3	10770800	10771599
Chr2	7704600	7705199	740	915	750	685	348	0.33595	0.0257267	up		AT3G28890	Chr3	10898000	10898399
Chr2	7731800	7732199	355	488	444	418	262	0.580565	0.00016195	up		AT3G29430	Chr3	11310800	11311199
Chr2	7756600	7757799	1226	1535	1247	1091	858	0.30179	0.0412206	up		AT3G29578	Chr3	11392800	11393799
Chr2	7767000	7767799	990	1119	1011	844	571	0.348504	0.0273316	up		AT3G29633	Chr3	11453000	11453399
Chr2	7931400	7931799	558	734	584	573	274	0.387664	0.0114982	up		AT3G29755	Chr3	11581800	11582599
Chr2	8151800	8152199	519	700	590	484	251	0.362834	0.0276298	up		AT3G30410	Chr3	12025600	12025999
Chr2	8183600	8183999	351	474	363	367	248	0.371945	0.0275596	up		AT3G30413	Chr3	12036400	12036799
Chr2	821000	822199	1256	1562	1207	1170	691	0.297612	0.0403393	up		AT3G30630	Chr3	12193400	12193799
Chr2	8360800	8361399	556	685	565	508	387	0.331472	0.0355759	up		AT3G30670	Chr3	12227600	12227799
Chr2	8385600	8385999	389	514	444	383	258	0.418054	0.0101476	up		AT3G30705	Chr3	12272400	12272799
Chr2	8462400	8462999	469	601	536	470	384	0.454372	0.00314995	up		AT3G31359	Chr3	12720000	12720999
Chr2	8571600	8571999	474	558	509	436	251	0.410763	0.010408	up		AT3G04690	Chr3	1275000	1275599
Chr2	8718200	8718999	792	1029	977	735	533	0.452471	0.0059006	up		AT3G31920	Chr3	12927200	12927399
Chr2	8774600	8774999	398	425	418	400	260	0.525218	0.00124889	up		AT3G32043	Chr3	13056800	13057199
Chr2	8794800	8795399	713	869	775	609	435	0.345151	0.0368346	up		AT3G32110	Chr3	13102800	13103399
Chr2	8829400	8829799	456	558	487	414	287	0.369639	0.02342	up		AT3G04780	Chr3	1313200	1313799
Chr2	8849000	8849999	813	1013	792	767	652	0.315182	0.0359213	up		AT3G32210	Chr3	13191400	13191799
Chr2	8958200	8959199	946	1223	1035	888	574	0.369938	0.0126256	up		AT3G04850	Chr3	1331800	1332199
Chr2	8978400	8979199	756	888	782	642	552	0.329078	0.0415083	up		AT3G32894	Chr3	13419800	13420999
Chr2	9005000	9005399	437	572	477	397	323	0.336627	0.0452336	up		AT3G33030	Chr3	13574400	13575199
Chr2	9015000	9016199	1230	1430	1251	1108	727	0.363372	0.0128833	up		AT3G33071	Chr3	13635800	13636399
Chr2	9108400	9109199	601	735	629	600	508	0.421372	0.00465158	up		AT3G33070	Chr3	13665800	13666599
Chr2	9123200	9123799	622	790	683	635	349	0.444395	0.00234576	up		AT3G33106	Chr3	13872800	13873799
Chr2	9577200	9577599	368	493	416	352	234	0.380494	0.0239684	up		AT3G33121	Chr3	13894800	13895399
Chr2	9841800	9842199	518	630	623	506	244	0.514688	0.000909542	up		AT3G01360	Chr3	139000	139599
Chr2	9904800	9905399	689	791	676	656	485	0.385908	0.011459	up		AT3G01370	Chr3	139000	139599
Chr2	9914600	9914799	248	302	258	239	151	0.39532	0.0274177	up		AT3G33151	Chr3	13963000	13963599
Chr3	10043600	10044599	795	1021	857	827	591	0.43635	0.00216898	up		AT3G33157	Chr3	13969400	13969999
Chr3	10103000	10103199	188	216	207	199	184	0.546664	0.00285781	up		AT3G33575	Chr3	14054400	14055399
Chr3	10245600	10245999	415	483	429	401	290	0.425112	0.00804972	up		AT3G38525	Chr3	14152600	14153399
Chr3	1028400	1029399	922	1033	865	818	598	0.319353	0.0391861	up		AT3G42230	Chr3	14387000	14387399
Chr3	10381800	10382399	614	864	710	611	407	0.387209	0.014647	up		AT3G42236	Chr3	14392600	14392999
Chr3	10520200	10520599	545	716	620	517	255	0.394788	0.0128833	up		AT3G42270	Chr3	14442800	14443799
Chr3	10540800	10541599	629	874	684	651	420	0.379079	0.0139379	up		AT3G42313	Chr3	14466000	14466599
Chr3	10560000	10560999	1173	1586	1308	1135	566	0.371552	0.0115534	up		AT3G42386	Chr3	14508800	14509599
Chr3	10770800	10771599	689	885	720	645	465	0.338374	0.0264588	up		AT3G42445	Chr3	14582000	14582399
Chr3	10898000	10898399	449	533	532	425	276	0.499926	0.00198609	up		AT3G42719	Chr3	14802400	14802999
Chr3	10930400	10930799	552	719	558	530	284	0.32142	0.0415184	up		AT3G43156	Chr3	15155600	15155999
Chr3	11267000	11267399	524	657	576	482	276	0.382571	0.0165507	up		AT3G43175	Chr3	15174000	15175199
Chr3	11310800	11311199	421	529	446	380	239	0.339985	0.0415083	up		AT3G43310	Chr3	15265600	15266399
Chr3	11392800	11393799	747	1032	878	836	539	0.496206	0.000550829	up		AT3G05390	Chr3	1547000	1547799
Chr3	11453000	11453399	328	412	401	339	258	0.541666	0.000741114	up		AT3G43640	Chr3	15546000	15546999
Chr3	1153800	1154599	581	782	678	635	443	0.493691	0.000728567	up		AT3G43688	Chr3	15595800	15596799
Chr3	11581800	11582599	797	998	873	803	501	0.443714	0.00173932	up		AT3G43722	Chr3	15620600	15621399
Chr3	1191000	1192399	1418	1639	1378	1268	847	0.328539	0.0241902	up		AT3G44920	Chr3	16400200	16400799
Chr3	12025600	12025999	438	487	533	445	284	0.614294	8.61659e-05	up		AT3G45520	Chr3	16696000	16696799
Chr3	12036400	12036799	449	582	457	439	205	0.342992	0.0335471	up		AT3G46375	Chr3	17056600	17057399
Chr3	12074800	12075399	756	915	763	688	415	0.336416	0.0262609	up		AT3G48115	Chr3	17771800	17773799
Chr3	12096200	12097399	1340	1716	1405	1195	801	0.309646	0.0381619	up		AT3G48120	Chr3	17771800	17773799
Chr3	12193400	12193799	412	568	503	388	194	0.408474	0.0191232	up		AT3G49744	Chr3	18450600	18451199
Chr3	12227600	12227799	404	463	406	350	130	0.338932	0.0480524	up		AT3G50030	Chr3	18546600	18546999
Chr3	12272400	12272799	427	513	439	378	205	0.336952	0.0439212	up		AT3G50130	Chr3	18590800	18591199
Chr3	12720000	12720999	883	1056	916	807	527	0.368363	0.0130267	up		AT3G50580	Chr3	18768600	18769399
Chr3	1275000	1275599	549	654	576	520	329	0.404898	0.00848734	up		AT3G50651	Chr3	18807400	18808199
Chr3	12927200	12927399	278	378	355	288	134	0.516532	0.00248416	up		AT3G53540	Chr3	19848800	19849199
Chr3	12969200	12969399	204	268	285	230	159	0.669128	0.000105712	up		AT3G54660	Chr3	20232800	20233199
Chr3	13031000	13031399	416	437	438	387	265	0.483414	0.00390159	up		AT3G55320	Chr3	20508000	20508399
Chr3	13056800	13057199	348	394	360	319	231	0.408574	0.0162856	up		AT3G55420	Chr3	20547800	20548199
Chr3	13102800	13103399	602	739	601	560	419	0.333715	0.0312296	up		AT3G55930	Chr3	20745400	20745799
Chr3	1313200	1313799	659	744	756	603	426	0.487238	0.00226978	up		AT3G56890	Chr3	21062800	21063199
Chr3	13141000	13141599	785	991	842	759	418	0.393209	0.00700795	up		AT3G57900	Chr3	21443200	21443599
Chr3	13191400	13191799	509	595	546	463	335	0.407297	0.0109388	up		AT3G58640	Chr3	21693200	21693999
Chr3	1331800	1332199	333	470	399	358	232	0.464057	0.00487578	up		AT3G59030	Chr3	21818800	21819199
Chr3	13419800	13420999	891	1188	975	909	694	0.405127	0.00482532	up		AT3G59150	Chr3	21873200	21873799
Chr3	13574400	13575199	576	751	632	565	387	0.396048	0.00934984	up		AT3G59300	Chr3	21918200	21918599
Chr3	13623200	13623599	376	484	413	359	226	0.387749	0.0187752	up		AT3G60280	Chr3	22280200	22280799
Chr3	13635800	13636399	564	675	626	490	343	0.386168	0.0207598	up		AT3G60935	Chr3	22520800	22521199
Chr3	13665800	13666599	662	857	671	645	454	0.338642	0.0262649	up		AT3G07185	Chr3	2284600	2284999
Chr3	1381400	1381599	196	232	208	180	130	0.398006	0.0389354	up		AT3G61810	Chr3	22877600	22877999
Chr3	13872800	13873799	859	1002	905	717	545	0.336693	0.040847	up		AT3G62170	Chr3	23018200	23018599
Chr3	13894800	13895399	550	780	619	611	314	0.439136	0.00468768	up		AT3G62529	Chr3	23130400	23131399
Chr3	139000	139599	550	657	621	559	382	0.506759	0.000585622	up		AT3G62900	Chr3	23252000	23252599
Chr3	13900800	13901999	1200	1575	1176	1155	725	0.295692	0.0449162	up		AT3G08790	Chr3	2670200	2670799
Chr3	13931000	13932199	1127	1359	1202	1072	671	0.410821	0.0035966	up		AT3G08800	Chr3	2670200	2670799
Chr3	13942800	13943199	399	477	438	413	240	0.498675	0.0013049	up		AT3G09620	Chr3	2951600	2952199
Chr3	13963000	13963599	576	655	578	519	388	0.369921	0.0198471	up		AT3G09970	Chr3	3064400	3064999
Chr3	13969400	13969999	507	604	558	515	350	0.489507	0.00107185	up		AT3G01930	Chr3	320800	321199
Chr3	14054400	14055399	988	1195	1040	876	691	0.350403	0.0207811	up		AT3G10360	Chr3	3216200	3216799
Chr3	14094200	14094599	579	694	647	533	259	0.428568	0.00644522	up		AT3G10430	Chr3	3243800	3244599
Chr3	1411200	1411799	777	909	758	693	395	0.321475	0.0363409	up		AT3G11080	Chr3	3471000	3471399
Chr3	14152600	14153399	636	780	783	621	434	0.526396	0.00063524	up		AT3G11165	Chr3	3499800	3500199
Chr3	14204600	14204999	3668	4161	3862	3280	2387	0.400774	0.00535129	up		AT3G12250	Chr3	3905600	3906399
Chr3	14241400	14242199	727	945	782	701	427	0.371658	0.0127757	up		AT3G12450	Chr3	3953200	3953599
Chr3	14387000	14387399	441	564	473	402	251	0.34293	0.038128	up		AT3G12585	Chr3	3994800	3995399
Chr3	14392600	14392999	443	499	429	406	249	0.362909	0.0285649	up		AT3G13010	Chr3	4163800	4164399
Chr3	14442800	14443799	904	1214	937	889	487	0.334028	0.0247602	up		AT3G13222	Chr3	4253800	4253999
Chr3	14466000	14466599	533	678	535	498	395	0.314524	0.0477393	up		AT3G13223	Chr3	4253800	4253999
Chr3	14508800	14509599	734	945	750	704	481	0.337299	0.0246705	up		AT3G02270	Chr3	449200	450399
Chr3	14582000	14582399	358	442	416	408	181	0.585562	0.000128202	up		AT3G13770	Chr3	4520200	4520999
Chr3	14790000	14791799	1697	2191	1649	1610	1042	0.291447	0.0417277	up		AT3G13850	Chr3	4559600	4560399
Chr3	14802400	14802999	467	595	461	463	354	0.34433	0.0329474	up		AT3G13855	Chr3	4559600	4560399
Chr3	15155600	15155999	317	345	303	285	220	0.364429	0.041981	up		AT3G14205	Chr3	4720400	4720799
Chr3	15174000	15175199	997	1246	1002	923	824	0.321985	0.0276583	up		AT3G14240	Chr3	4742000	4742799
Chr3	15265600	15266399	506	734	654	624	509	0.596221	6.70859e-05	up		AT3G14290	Chr3	4764600	4764999
Chr3	1547000	1547799	610	769	706	536	550	0.388817	0.0215692	up		AT3G02430	Chr3	498200	498599
Chr3	15511800	15512199	352	428	393	334	264	0.438406	0.0081035	up		AT3G14920	Chr3	5018200	5018599
Chr3	15523200	15523799	594	640	554	556	355	0.381654	0.0199815	up		AT3G14920	Chr3	5019000	5019599
Chr3	15546000	15546999	859	1193	973	878	582	0.400729	0.00703812	up		AT3G15095	Chr3	5082400	5083399
Chr3	15595800	15596799	978	1138	927	876	610	0.307131	0.0418899	up		AT3G15150	Chr3	5104800	5105199
Chr3	15620600	15621399	864	1089	944	823	548	0.397763	0.00644605	up		AT3G15400	Chr3	5202200	5202599
Chr3	16400200	16400799	570	685	621	519	467	0.399816	0.0113699	up		AT3G02645	Chr3	567600	567999
Chr3	1640200	1640599	369	405	422	364	240	0.556361	0.000609765	up		AT3G17630	Chr3	6030800	6031399
Chr3	16696000	16696799	856	1063	859	861	503	0.385695	0.00825957	up		AT3G02810	Chr3	608800	609199
Chr3	1678200	1678999	693	819	706	603	591	0.3296	0.0373185	up		AT3G18600	Chr3	6402800	6402999
Chr3	16918000	16918399	400	532	440	416	233	0.423952	0.007654	up		AT3G18620	Chr3	6410000	6411599
Chr3	16945400	16945799	309	412	339	302	236	0.376055	0.0285722	up		AT3G19510	Chr3	6763800	6764999
Chr3	17056600	17057399	706	933	788	701	513	0.407197	0.00607499	up		AT3G19553	Chr3	6791400	6792199
Chr3	17173200	17173399	193	231	209	218	165	0.552465	0.00231626	up		AT3G19680	Chr3	6840200	6840599
Chr3	17233400	17233999	452	544	492	411	340	0.39738	0.0149022	up		AT3G20940	Chr3	7339800	7339999
Chr3	17439600	17440199	556	740	590	533	422	0.33956	0.0310997	up		AT3G21320	Chr3	7500800	7501199
Chr3	17449400	17450399	1084	1423	1174	981	756	0.325946	0.033566	up		AT3G21660	Chr3	7624200	7625399
Chr3	17558800	17559799	944	1156	943	852	634	0.314408	0.0345209	up		AT3G22450	Chr3	7962600	7963199
Chr3	17763000	17763399	395	535	489	410	279	0.497017	0.00185153	up		AT3G22760	Chr3	8045400	8045799
Chr3	17771800	17773799	1917	2608	2064	1889	1354	0.353748	0.0122758	up		AT3G22940	Chr3	8131600	8132399
Chr3	17892600	17893599	826	980	823	798	638	0.384056	0.0090055	up		AT3G24240	Chr3	8780600	8780999
Chr3	1806800	1807199	370	544	440	362	282	0.362102	0.0418194	up		AT3G24650	Chr3	8998600	8999399
Chr3	18126200	18126599	382	512	440	368	321	0.399355	0.0167372	up		AT3G24860	Chr3	9073600	9074399
Chr3	1836400	1836799	397	428	391	352	237	0.382611	0.026404	up		AT3G25550	Chr3	9278800	9279199
Chr3	18450600	18451199	535	668	549	533	385	0.390472	0.0109349	up		AT3G25620	Chr3	9318400	9318999
Chr3	18489800	18490399	523	745	565	551	336	0.367673	0.0225687	up		AT4G18350	Chr4	10142400	10142799
Chr3	18546600	18546999	445	540	475	421	317	0.403658	0.0111494	up		AT4G02312	Chr4	1017800	1018399
Chr3	18590800	18591199	448	488	428	393	313	0.345176	0.0429079	up		AT4G02314	Chr4	1017800	1018399
Chr3	18673000	18673199	144	233	200	184	181	0.580839	0.0027951	up		AT4G19580	Chr4	10669000	10669199
Chr3	1871600	1872799	1440	1835	1443	1320	886	0.298548	0.0376099	up		AT4G20360	Chr4	10990000	10990199
Chr3	18768600	18769399	804	931	785	727	612	0.339058	0.0259116	up		AT4G20770	Chr4	11130600	11131599
Chr3	1877600	1878599	918	1159	1053	893	695	0.447751	0.00196883	up		AT4G20880	Chr4	11179200	11180199
Chr3	18807400	18808199	776	951	845	724	548	0.401549	0.00718109	up		AT4G02640	Chr4	1153800	1154999
Chr3	18882400	18882599	210	238	272	253	171	0.767141	4.1245e-06	up		AT4G21800	Chr4	11573600	11574399
Chr3	19004400	19005199	693	905	793	641	539	0.387001	0.0147266	up		AT4G22200	Chr4	11746600	11747199
Chr3	19068400	19069599	954	1188	1004	907	736	0.377327	0.00868529	up		AT4G22810	Chr4	11984000	11984799
Chr3	19110800	19111199	388	435	390	370	264	0.421952	0.0107758	up		AT4G23620	Chr4	12316000	12316199
Chr3	19168800	19169399	609	747	617	568	425	0.346931	0.024128	up		AT4G24100	Chr4	12515000	12515599
Chr3	19207200	19207999	806	1008	763	783	544	0.313886	0.0411953	up		AT4G24390	Chr4	12614800	12615399
Chr3	19369600	19369799	235	307	267	215	132	0.37395	0.0459644	up		AT4G25210	Chr4	12917000	12917799
Chr3	19456400	19456999	479	577	486	476	398	0.406868	0.00928504	up		AT4G25360	Chr4	12971000	12972199
Chr3	19569400	19569999	487	637	505	490	412	0.370361	0.0186082	up		AT4G25580	Chr4	13055000	13055599
Chr3	19613000	19613399	377	463	414	427	284	0.545094	0.000466124	up		AT4G25740	Chr4	13107400	13107799
Chr3	19663000	19663799	863	984	845	772	531	0.344295	0.0239502	up		AT4G25800	Chr4	13124800	13125399
Chr3	19791000	19791599	598	656	603	497	426	0.343137	0.0434455	up		AT4G02960	Chr4	1315800	1316399
Chr3	19848800	19849199	318	451	415	341	275	0.523543	0.00175941	up		AT4G27160	Chr4	13611600	13611999
Chr3	19890600	19891599	899	1054	955	819	686	0.398168	0.00778849	up		AT4G27210	Chr4	13627400	13627999
Chr3	2005800	2006199	406	562	459	429	242	0.424477	0.00808524	up		AT4G27210	Chr4	13630400	13630799
Chr3	20060400	20060799	347	407	391	321	297	0.454655	0.00711968	up		AT4G27980	Chr4	13921800	13922799
Chr3	20071000	20071399	367	445	426	411	313	0.5854	0.000121861	up		AT4G28365	Chr4	14033000	14033799
Chr3	20073800	20074799	772	1058	784	819	507	0.360048	0.0209326	up		AT4G28760	Chr4	14207800	14207999
Chr3	20089000	20089399	445	476	469	406	276	0.458235	0.00593649	up		AT4G28800	Chr4	14221600	14222599
Chr3	20132400	20133399	858	1148	995	927	586	0.485708	0.00051333	up		AT4G29250	Chr4	14421000	14421399
Chr3	20137800	20138399	774	974	806	721	429	0.34752	0.0201316	up		AT4G31030	Chr4	15111800	15112199
Chr3	20232800	20233199	425	553	502	389	299	0.407911	0.0170614	up		AT4G31250	Chr4	15179000	15179399
Chr3	20244400	20244999	634	737	626	593	423	0.368874	0.0166361	up		AT4G31760	Chr4	15368000	15368599
Chr3	20301800	20302199	398	482	467	382	277	0.487182	0.00262796	up		AT4G31880	Chr4	15422800	15423799
Chr3	20508000	20508399	292	440	369	319	250	0.462872	0.00816849	up		AT4G03470	Chr4	1542400	1542999
Chr3	20547800	20548199	332	420	404	289	291	0.421555	0.0237396	up		AT4G33850	Chr4	16227200	16227799
Chr3	20725200	20725999	736	898	726	667	529	0.310742	0.0420856	up		AT4G34320	Chr4	16422000	16422399
Chr3	20745400	20745799	554	663	594	516	276	0.406143	0.00888689	up		AT4G34540	Chr4	16498800	16498999
Chr3	20777800	20778599	621	849	680	629	476	0.381144	0.0127757	up		AT4G03745	Chr4	1666600	1667599
Chr3	20896600	20897199	653	790	639	588	427	0.306545	0.0494335	up		AT4G03750	Chr4	1666600	1667599
Chr3	21062800	21063199	436	495	448	408	249	0.41559	0.010272	up		AT4G03770	Chr4	1673600	1674199
Chr3	21115200	21115599	350	411	420	355	219	0.564138	0.000412034	up		AT4G03790	Chr4	1688200	1688599
Chr3	21264800	21265399	647	748	691	608	404	0.433875	0.00423058	up		AT4G36980	Chr4	17435000	17436199
Chr3	21311200	21312199	772	1104	843	810	636	0.369956	0.0167698	up		AT4G38552	Chr4	18027200	18027999
Chr3	21401800	21402199	395	509	401	380	269	0.333841	0.0439629	up		AT4G03880	Chr4	1830200	1830399
Chr3	21421400	21421799	400	520	438	363	253	0.343531	0.0433743	up		AT4G39745	Chr4	18437600	18438199
Chr3	21437800	21439199	1357	1661	1421	1214	820	0.343796	0.0189486	up		AT4G04560	Chr4	2284600	2285399
Chr3	21443200	21443599	405	472	420	364	294	0.37592	0.0243281	up		AT4G04955	Chr4	2524000	2525199
Chr3	21494800	21495199	369	361	418	349	279	0.5977	0.000673502	up		AT4G04980	Chr4	2545200	2546199
Chr3	21693200	21693999	684	899	706	692	558	0.367665	0.014644	up		AT4G05018	Chr4	2571400	2571799
Chr3	21726400	21727399	782	916	752	724	675	0.336869	0.0267125	up		AT4G05634	Chr4	3008200	3008599
Chr3	21818800	21819199	644	779	710	609	273	0.429751	0.00444911	up		AT4G06482	Chr4	3082600	3083199
Chr3	21873200	21873799	599	733	595	573	346	0.352447	0.0219553	up		AT4G00752	Chr4	320200	320999
Chr3	21918200	21918599	433	500	418	391	256	0.332472	0.046307	up		AT4G06512	Chr4	3265400	3265599
Chr3	22039400	22039999	558	731	610	537	415	0.37645	0.0153341	up		AT4G06545	Chr4	3389600	3390599
Chr3	22274200	22274799	726	904	769	647	444	0.337705	0.0306825	up		AT4G06546	Chr4	3396600	3397199
Chr3	22280200	22280799	599	781	609	573	396	0.322219	0.038534	up		AT4G06593	Chr4	3633400	3633799
Chr3	22373200	22373599	559	711	630	567	304	0.457917	0.00201738	up		AT4G06613	Chr4	3727800	3728199
Chr3	22377600	22378199	640	750	667	556	436	0.352008	0.0286581	up		AT4G06658	Chr4	3855000	3855999
Chr3	22520800	22521199	343	394	341	330	240	0.403362	0.0170013	up		AT4G07415	Chr4	4212400	4213199
Chr3	22832400	22832799	425	475	488	395	270	0.506248	0.00216816	up		AT4G07528	Chr4	4363600	4363999
Chr3	2284600	2284999	542	666	588	462	281	0.336621	0.0477193	up		AT4G07530	Chr4	4368200	4368599
Chr3	22877600	22877999	320	379	351	289	274	0.410874	0.0180787	up		AT4G07563	Chr4	4386200	4386599
Chr3	22983600	22984399	630	767	728	644	606	0.514156	0.000366042	up		AT4G07566	Chr4	4386200	4386599
Chr3	23013200	23013599	351	457	403	355	313	0.452143	0.00524496	up		AT4G07580	Chr4	4394000	4394799
Chr3	23018200	23018599	409	569	476	468	293	0.499016	0.00138566	up		AT4G07666	Chr4	4459200	4459999
Chr3	23130400	23131399	911	1157	934	816	734	0.301839	0.0469287	up		AT4G07675	Chr4	4467600	4468399
Chr3	2317600	2318199	459	503	445	445	348	0.423714	0.00989541	up		AT4G07680	Chr4	4467600	4468399
Chr3	23252000	23252599	930	1009	996	878	357	0.482669	0.00132004	up		AT4G07738	Chr4	4534800	4535399
Chr3	23289400	23290599	871	1153	994	912	792	0.459757	0.00108124	up		AT4G07810	Chr4	4633000	4633599
Chr3	2347800	2348199	424	506	488	390	223	0.454559	0.00602545	up		AT4G07830	Chr4	4648000	4648399
Chr3	2396400	2396799	276	417	380	350	227	0.628189	0.000135588	up		AT4G07932	Chr4	4731200	4731799
Chr3	2476200	2476399	186	234	204	183	145	0.424689	0.025531	up		AT4G01140	Chr4	491000	491799
Chr3	2492400	2492999	583	678	668	579	394	0.520859	0.000475294	up		AT4G08097	Chr4	5004800	5005399
Chr3	2534800	2535399	582	747	733	561	447	0.502578	0.00185989	up		AT4G08105	Chr4	5023600	5024399
Chr3	2652800	2653199	417	498	471	425	239	0.509391	0.000928713	up		AT4G08114	Chr4	5069600	5070599
Chr3	2670200	2670799	486	562	512	481	462	0.460447	0.00282764	up		AT4G08263	Chr4	5211600	5211999
Chr3	2716800	2717799	858	1020	817	819	620	0.341642	0.0234501	up		AT4G08310	Chr4	5249000	5249399
Chr3	2743000	2744199	1241	1504	1266	1189	825	0.37963	0.00666064	up		AT4G08695	Chr4	5566200	5566799
Chr3	2903000	2903399	428	506	438	398	267	0.37925	0.0194578	up		AT4G08780	Chr4	5608000	5608399
Chr3	2951600	2952199	806	1030	833	731	496	0.311899	0.0411912	up		AT4G09430	Chr4	5974800	5974999
Chr3	3002600	3003199	481	678	552	512	433	0.42683	0.00669487	up		AT4G09649	Chr4	6100600	6100999
Chr3	3019200	3020799	1415	1786	1399	1278	1052	0.285184	0.048824	up		AT4G10430	Chr4	6456800	6457799
Chr3	3056800	3057399	604	719	605	568	327	0.366213	0.017155	up		AT4G10990	Chr4	6726800	6727599
Chr3	3064400	3064999	500	633	489	506	381	0.357904	0.0257267	up		AT4G11160	Chr4	6805000	6806199
Chr3	320800	321199	389	404	384	347	300	0.414005	0.0178453	up		AT4G12065	Chr4	7233400	7233799
Chr3	3216200	3216799	592	742	642	619	442	0.462357	0.00156501	up		AT4G12070	Chr4	7233400	7233799
Chr3	3237400	3237799	411	515	517	413	291	0.546702	0.000603658	up		AT4G12770	Chr4	7507000	7508799
Chr3	3243800	3244599	756	880	733	676	489	0.32237	0.0365749	up		AT4G12780	Chr4	7514600	7514799
Chr3	3286400	3286999	576	667	550	545	392	0.356079	0.0246105	up		AT4G14350	Chr4	8259400	8260599
Chr3	3425000	3425399	418	523	477	453	301	0.526214	0.000484781	up		AT4G14480	Chr4	8330200	8330799
Chr3	3471000	3471399	423	493	424	374	257	0.338916	0.0433577	up		AT4G14560	Chr4	8360800	8361199
Chr3	3482200	3482599	372	427	369	336	243	0.357098	0.0359437	up		AT4G14780	Chr4	8493400	8493799
Chr3	3499800	3500199	338	463	424	367	238	0.528781	0.00096162	up		AT4G15390	Chr4	8793200	8793999
Chr3	3604200	3604399	217	258	239	229	141	0.519462	0.00326357	up		AT4G15650	Chr4	8922600	8922999
Chr3	3606200	3606599	474	527	506	430	317	0.437255	0.00751346	up		AT4G02050	Chr4	901200	902199
Chr3	3608400	3609199	654	817	685	631	507	0.381928	0.0105755	up		AT4G16200	Chr4	9175600	9176599
Chr3	3683200	3684199	914	1169	992	894	709	0.400417	0.00513048	up		AT4G16267	Chr4	9205400	9206199
Chr3	3871000	3871399	373	490	408	368	266	0.39189	0.0166464	up		AT4G02180	Chr4	962200	962799
Chr3	3905600	3906399	708	846	683	655	523	0.324421	0.0344597	up		AT4G17150	Chr4	9641400	9641999
Chr3	3953200	3953599	459	587	504	501	255	0.487538	0.00129086	up		AT4G17210	Chr4	9652600	9653399
Chr3	3983600	3983999	294	353	332	317	229	0.545539	0.000755275	up		AT5G27970	Chr5	10014400	10014799
Chr3	3994800	3995399	695	818	671	645	393	0.338133	0.0278271	up		AT5G28085	Chr5	10097800	10098999
Chr3	4133600	4134599	906	1059	936	820	585	0.374811	0.0121482	up		AT5G28290	Chr5	10279000	10279399
Chr3	4163800	4164399	572	751	632	573	394	0.410684	0.00658466	up		AT5G28310	Chr5	10300800	10301199
Chr3	4253800	4253999	214	232	245	196	129	0.517732	0.00595068	up		AT5G28320	Chr5	10300800	10301199
Chr3	4393200	4393599	453	505	444	417	291	0.382058	0.0202915	up		AT5G28410	Chr5	10357800	10358399
Chr3	4398200	4398599	406	499	414	374	232	0.34167	0.03879	up		AT5G28415	Chr5	10363200	10363799
Chr3	4412400	4412599	274	351	320	245	111	0.395819	0.0318922	up		AT5G28415	Chr5	10364600	10364999
Chr3	449200	450399	1010	1192	940	936	714	0.308824	0.0406546	up		AT5G28420	Chr5	10364600	10364999
Chr3	4520200	4520999	567	661	636	619	410	0.570526	7.97244e-05	up		AT5G28463	Chr5	10379800	10380999
Chr3	4544800	4545199	372	531	434	365	248	0.372616	0.0309182	up		AT5G28662	Chr5	10685000	10685399
Chr3	4559600	4560399	948	1131	973	828	520	0.330796	0.030738	up		AT5G28776	Chr5	10811000	10811999
Chr3	4720400	4720799	407	458	438	390	316	0.472912	0.0033542	up		AT5G04020	Chr5	1082400	1082599
Chr3	4742000	4742799	693	965	756	658	499	0.319171	0.0459881	up		AT5G29022	Chr5	11046600	11047799
Chr3	4764600	4764999	414	443	386	389	230	0.38968	0.0237226	up		AT5G30673	Chr5	11399600	11400599
Chr3	4807400	4808199	697	772	704	625	476	0.389437	0.0131401	up		AT5G32002	Chr5	11475200	11475999
Chr3	4892400	4892799	379	461	431	348	293	0.430275	0.0104704	up		AT5G31092	Chr5	11569800	11570799
Chr3	498200	498599	396	547	449	379	274	0.359638	0.034044	up		AT5G31087	Chr5	11647800	11648399
Chr3	5018200	5018599	443	547	488	424	317	0.422602	0.0076108	up		AT5G32254	Chr5	11912200	11912999
Chr3	5019000	5019599	551	568	532	458	451	0.352291	0.0446545	up		AT5G32516	Chr5	12164800	12165599
Chr3	5043000	5043599	578	642	546	511	425	0.328454	0.0444968	up		AT5G32690	Chr5	12331400	12331599
Chr3	5082400	5083399	1383	1630	1343	1205	809	0.295958	0.0451072	up		AT5G32775	Chr5	12350600	12350999
Chr3	5104800	5105199	386	472	426	364	260	0.421129	0.0100183	up		AT5G32690	Chr5	12350600	12350999
Chr3	5160400	5160799	449	528	479	445	289	0.45868	0.00314375	up		AT5G32850	Chr5	12362000	12363199
Chr3	5202200	5202599	466	523	478	393	282	0.350873	0.0414501	up		AT5G32690	Chr5	12362000	12363199
Chr3	5219000	5219399	336	485	398	366	259	0.447082	0.00733333	up		AT5G33255	Chr5	12520600	12521399
Chr3	5253200	5253999	869	986	901	735	546	0.352375	0.0291799	up		AT5G04460	Chr5	1259800	1260799
Chr3	5396600	5397199	531	639	599	526	427	0.482884	0.00131523	up		AT5G33388	Chr5	12641000	12642199
Chr3	5409200	5410199	836	1062	893	767	636	0.349134	0.0208307	up		AT5G33431	Chr5	12744400	12745199
Chr3	5523200	5524399	1596	2097	1602	1495	801	0.29252	0.0417498	up		AT5G33434	Chr5	12747800	12748199
Chr3	5601600	5602599	887	1049	829	831	594	0.318397	0.0365813	up		AT5G33624	Chr5	12770800	12771399
Chr3	567600	567999	443	486	447	369	332	0.345826	0.0487951	up		AT5G34623	Chr5	12929400	12929799
Chr3	5769200	5770199	809	979	808	748	624	0.339995	0.022591	up		AT5G34665	Chr5	12939600	12939999
Chr3	599400	600199	811	994	800	757	542	0.328508	0.0277415	up		AT5G34686	Chr5	12939600	12939999
Chr3	6030800	6031399	560	630	585	557	381	0.477125	0.00173157	up		AT5G34749	Chr5	12951600	12952199
Chr3	608800	609199	414	572	461	439	300	0.417469	0.00915255	up		AT5G34833	Chr5	12990600	12990999
Chr3	6095000	6095399	278	384	281	309	221	0.384546	0.0338859	up		AT5G34862	Chr5	13144200	13144799
Chr3	62400	62799	350	481	373	370	288	0.387688	0.0206924	up		AT5G34870	Chr5	13186000	13187599
Chr3	6383800	6384199	471	487	476	386	272	0.376196	0.0373274	up		AT5G35334	Chr5	13538200	13538599
Chr3	6402800	6402999	157	177	193	174	176	0.674259	0.000274756	up		AT5G01335	Chr5	135600	136199
Chr3	6410000	6411599	1270	1706	1291	1278	988	0.336928	0.0207541	up		AT5G35413	Chr5	13639800	13640399
Chr3	6434200	6434799	534	644	604	509	416	0.457001	0.0031262	up		AT5G01335	Chr5	141000	141399
Chr3	6524600	6525199	667	767	743	604	447	0.444538	0.00493424	up		AT5G35965	Chr5	14116400	14117199
Chr3	6569600	6569999	393	526	444	414	227	0.447728	0.0046144	up		AT5G36230	Chr5	14274000	14274799
Chr3	6763800	6764999	987	1203	1065	911	618	0.391094	0.00779064	up		AT5G04895	Chr5	1429800	1430199
Chr3	6791400	6792199	634	797	673	587	506	0.358452	0.0199587	up		AT5G38220	Chr5	15268800	15268999
Chr3	6840200	6840599	525	655	521	498	290	0.331471	0.0360047	up		AT5G40050	Chr5	16032200	16032799
Chr3	6970800	6970999	304	420	395	288	148	0.460819	0.0124991	up		AT5G05430	Chr5	1606600	1606999
Chr3	7066000	7066799	695	768	710	679	538	0.460216	0.00235352	up		AT5G05435	Chr5	1606600	1606999
Chr3	7339800	7339999	136	165	187	145	144	0.681091	0.000460379	up		AT5G40800	Chr5	16334800	16335799
Chr3	7387200	7387799	682	937	710	686	411	0.335877	0.0304376	up		AT5G41320	Chr5	16534600	16534999
Chr3	7500800	7501199	392	454	397	441	242	0.527359	0.00134142	up		AT5G42146	Chr5	16844200	16844599
Chr3	7623400	7623799	469	501	439	447	285	0.403874	0.0168492	up		AT5G42380	Chr5	16942800	16942999
Chr3	7624200	7625399	1088	1305	1099	993	707	0.34537	0.0174997	up		AT5G43390	Chr5	17424200	17424599
Chr3	7822200	7822999	737	868	721	674	425	0.336603	0.027318	up		AT5G43430	Chr5	17454200	17454799
Chr3	7962600	7963199	795	834	805	708	463	0.423122	0.0085733	up		AT5G43800	Chr5	17604200	17604999
Chr3	8006800	8007799	844	1065	838	793	579	0.316636	0.0335917	up		AT5G43935	Chr5	17681200	17681599
Chr3	8045400	8045799	476	562	499	414	305	0.352339	0.0347493	up		AT5G05980	Chr5	1804000	1804399
Chr3	8131600	8132399	670	915	743	631	471	0.340973	0.0322268	up		AT5G05985	Chr5	1804000	1804399
Chr3	8474000	8474199	168	216	172	173	136	0.390436	0.0493951	up		AT5G45116	Chr5	18235800	18236199
Chr3	8479000	8479399	305	360	333	292	291	0.449439	0.00793235	up		AT5G45276	Chr5	18340400	18340999
Chr3	8534000	8534799	683	863	687	657	589	0.341935	0.0237035	up		AT5G45595	Chr5	18486600	18487199
Chr3	861600	862399	722	884	726	649	467	0.316678	0.0393191	up		AT5G01460	Chr5	188800	189399
Chr3	8624600	8624999	455	544	512	407	270	0.417084	0.0124882	up		AT5G47170	Chr5	19158600	19158799
Chr3	8673200	8673599	394	489	419	412	248	0.455671	0.00383509	up		AT5G47280	Chr5	19193200	19193799
Chr3	8780600	8780999	359	493	406	364	274	0.401661	0.015322	up		AT5G47460	Chr5	19253400	19253799
Chr3	8826200	8826599	432	542	490	431	255	0.461421	0.0029937	up		AT5G47470	Chr5	19253400	19253799
Chr3	8943000	8943399	368	460	364	362	232	0.354127	0.0344661	up		AT5G47740	Chr5	19338600	19338999
Chr3	8983800	8984199	282	375	283	310	277	0.40062	0.0245728	up		AT5G47780	Chr5	19348000	19348799
Chr3	8998600	8999399	785	1051	857	765	570	0.367872	0.0140372	up		AT5G49650	Chr5	20151200	20152399
Chr3	9073600	9074399	758	959	880	759	576	0.475147	0.000985316	up		AT5G06600	Chr5	2027200	2027799
Chr3	9152400	9153599	1317	1654	1503	1188	875	0.397112	0.0100907	up		AT5G49945	Chr5	20319200	20319399
Chr3	9278800	9279199	364	418	411	335	279	0.467904	0.00551837	up		AT5G50280	Chr5	20459000	20459399
Chr3	9318400	9318999	552	751	622	540	348	0.381805	0.015444	up		AT5G50440	Chr5	20538000	20538199
Chr3	9666800	9667599	993	1179	989	870	593	0.313653	0.0379874	up		AT5G51174	Chr5	20794800	20795399
Chr3	9759200	9760199	735	928	791	711	623	0.395926	0.007047	up		AT5G51420	Chr5	20885600	20886599
Chr3	9796000	9796399	321	360	355	346	278	0.579368	0.000328934	up		AT5G51800	Chr5	21048400	21048999
Chr3	9874400	9874799	355	504	392	384	261	0.404367	0.0157052	up		AT5G52990	Chr5	21484400	21484799
Chr3	9930600	9931199	626	811	683	590	384	0.36901	0.0168811	up		AT5G06970	Chr5	2165600	2165999
Chr4	10142400	10142799	513	574	510	482	280	0.404248	0.0113032	up		AT5G07090	Chr5	2202400	2205599
Chr4	1017800	1018399	577	666	673	553	362	0.515625	0.000854683	up		AT5G55130	Chr5	22375400	22375999
Chr4	10495200	10496199	1028	1322	1040	950	664	0.304501	0.0389819	up		AT5G55131	Chr5	22375400	22375999
Chr4	10609000	10609999	800	1044	902	832	614	0.456766	0.00123563	up		AT5G55320	Chr5	22435800	22436599
Chr4	1065600	1066599	1072	1376	1082	1002	706	0.31227	0.0324162	up		AT5G55830	Chr5	22594400	22595599
Chr4	10669000	10669199	203	237	238	217	108	0.587862	0.000832632	up		AT5G56090	Chr5	22715400	22715799
Chr4	10990000	10990199	245	361	292	243	152	0.370297	0.0486423	up		AT5G57930	Chr5	23454800	23455599
Chr4	11130600	11131599	822	1045	845	762	576	0.326999	0.0288732	up		AT5G58240	Chr5	23558800	23559799
Chr4	11179200	11180199	1030	1376	1149	974	732	0.365178	0.0151658	up		AT5G07505	Chr5	2374600	2374999
Chr4	11395600	11395999	399	485	411	374	274	0.369516	0.0241306	up		AT5G58880	Chr5	23778400	23779399
Chr4	1153800	1154999	1004	1254	1126	919	710	0.397304	0.00876546	up		AT5G59450	Chr5	23976000	23976399
Chr4	11542200	11542799	667	835	691	606	442	0.330162	0.0329819	up		AT5G59750	Chr5	24073000	24073799
Chr4	11545800	11545999	184	237	212	205	150	0.530886	0.00343048	up		AT5G60050	Chr5	24184600	24184999
Chr4	11573600	11574399	857	898	794	753	477	0.348882	0.0328471	up		AT5G60980	Chr5	24545600	24546199
Chr4	11612200	11612799	536	725	590	535	336	0.382686	0.0140212	up		AT5G07930	Chr5	2530800	2531199
Chr4	11742000	11742599	502	625	531	478	373	0.38246	0.0142691	up		AT5G64210	Chr5	25686400	25686799
Chr4	11746600	11747199	495	657	643	560	397	0.607885	3.06476e-05	up		AT5G64340	Chr5	25731400	25731999
Chr4	11946400	11947399	1015	1186	999	882	655	0.310421	0.0411796	up		AT5G64910	Chr5	25941000	25941399
Chr4	11984000	11984799	757	971	859	797	532	0.483029	0.000577435	up		AT5G65615	Chr5	26221800	26222799
Chr4	12072600	12073599	1046	1263	1038	956	740	0.328545	0.024511	up		AT5G65620	Chr5	26221800	26222799
Chr4	12280600	12281199	562	718	608	529	378	0.372146	0.0168567	up		AT5G66055	Chr5	26417800	26418199
Chr4	12316000	12316199	190	214	199	186	115	0.468805	0.0135477	up		AT5G66190	Chr5	26451200	26451799
Chr4	12470800	12471199	463	582	470	437	258	0.338798	0.035026	up		AT5G66410	Chr5	26521000	26521999
Chr4	12480200	12480799	571	639	552	496	383	0.327813	0.0453862	up		AT5G67010	Chr5	26748800	26749599
Chr4	12515000	12515599	654	766	653	613	421	0.373101	0.0144484	up		AT5G67130	Chr5	26791600	26791799
Chr4	12520200	12520599	301	419	418	366	333	0.670662	1.82235e-05	up		AT5G67250	Chr5	26832800	26833599
Chr4	12614800	12615399	553	580	544	503	363	0.417562	0.0114341	up		AT5G08450	Chr5	2731000	2732599
Chr4	12732600	12732799	265	328	271	273	140	0.418969	0.0166074	up		AT5G08630	Chr5	2802400	2802999
Chr4	12837400	12838199	702	879	794	732	506	0.491637	0.000499412	up		AT5G09550	Chr5	2965200	2965399
Chr4	12917000	12917799	650	851	809	657	520	0.509395	0.000780324	up		AT5G09610	Chr5	2981200	2981599
Chr4	12971000	12972199	954	1147	997	935	740	0.419237	0.00301056	up		AT5G09710	Chr5	3010600	3010999
Chr4	13055000	13055599	667	788	723	603	429	0.403211	0.00975845	up		AT5G09830	Chr5	3058800	3059399
Chr4	13102800	13103999	1351	1808	1515	1306	821	0.382963	0.00823981	up		AT5G09840	Chr5	3058800	3059399
Chr4	13106000	13106399	363	436	374	339	265	0.375908	0.0243636	up		AT5G10660	Chr5	3371200	3371599
Chr4	13107400	13107799	341	422	405	303	256	0.430942	0.0160406	up		AT5G12460	Chr5	4043000	4043599
Chr4	13124800	13125399	579	773	632	561	340	0.365703	0.0187118	up		AT5G12890	Chr5	4069600	4070999
Chr4	1315800	1316399	492	639	539	496	475	0.416988	0.00661429	up		AT5G02140	Chr5	423200	423799
Chr4	13611600	13611999	445	602	497	443	290	0.391371	0.014521	up		AT5G13290	Chr5	4255600	4255999
Chr4	13627400	13627999	530	735	612	537	302	0.409643	0.00916831	up		AT5G13300	Chr5	4255600	4255999
Chr4	13630400	13630799	741	922	753	688	368	0.335433	0.025831	up		AT5G13770	Chr5	4446200	4446999
Chr4	13768800	13769599	818	1040	955	791	522	0.452111	0.00235481	up		AT5G14230	Chr5	4595200	4595999
Chr4	13883800	13884199	416	539	451	379	282	0.340989	0.0424028	up		AT5G14370	Chr5	4633200	4633599
Chr4	13904600	13905799	1014	1248	1033	950	707	0.351547	0.01476	up		AT5G02450	Chr5	534000	534599
Chr4	13921800	13922799	739	932	801	754	659	0.439759	0.00209296	up		AT5G18525	Chr5	6150800	6151799
Chr4	14033000	14033799	720	811	698	633	486	0.333451	0.0345946	up		AT5G18970	Chr5	6333200	6333399
Chr4	14159400	14160399	1008	1217	1011	893	634	0.314614	0.0355082	up		AT5G19230	Chr5	6468000	6468399
Chr4	14207800	14207999	253	318	290	239	131	0.431289	0.0157293	up		AT5G20310	Chr5	6856600	6856999
Chr4	14221600	14222599	860	1020	918	841	668	0.442937	0.00189362	up		AT5G21150	Chr5	7192400	7193199
Chr4	14251400	14251599	159	237	190	175	123	0.432966	0.0285737	up		AT5G03130	Chr5	736200	736599
Chr4	1428200	1428799	646	833	751	583	456	0.392799	0.0171365	up		AT5G22355	Chr5	7402200	7402599
Chr4	14318200	14318799	636	768	695	588	451	0.408876	0.00791137	up		AT5G22770	Chr5	7581600	7581799
Chr4	14369000	14369799	907	1028	910	789	614	0.347052	0.0252314	up		AT5G23260	Chr5	7836000	7836599
Chr4	14421000	14421399	407	481	402	367	272	0.331702	0.0477546	up		AT5G23680	Chr5	7985400	7985999
Chr4	14576000	14576399	312	373	337	288	270	0.406975	0.0180797	up		AT5G24350	Chr5	8303000	8303399
Chr4	146000	146399	426	471	443	367	293	0.386385	0.0248243	up		AT5G24350	Chr5	8309000	8309399
Chr4	14704600	14705399	790	1000	779	804	529	0.368148	0.0144818	up		AT5G25330	Chr5	8791600	8791999
Chr4	14889200	14889599	511	599	535	440	346	0.349665	0.0360428	up		AT5G26270	Chr5	9206600	9207399
Chr4	14930800	14931599	792	953	795	715	518	0.33094	0.0287419	up		AT5G26360	Chr5	9258200	9258799
Chr4	14958600	14959999	1245	1535	1264	1120	858	0.319142	0.0283782	up		AT5G26940	Chr5	9481800	9482399
Chr4	15111800	15112199	425	530	461	414	295	0.415904	0.00858302	up		AT5G27010	Chr5	9508000	9508799
Chr4	15132600	15133199	509	626	548	491	332	0.41369	0.00722998	up		AT5G27020	Chr5	9508000	9508799
Chr4	15179000	15179399	410	429	437	385	281	0.501776	0.00270128	up		AT5G27440	Chr5	9689800	9690199
Chr4	15252200	15252999	827	985	865	794	569	0.411993	0.00444912	up		AT5G27450	Chr5	9689800	9690199
Chr4	15285000	15285399	442	501	434	424	213	0.401447	0.0136405	up		AT1G31930	Chr1	11466200	11466599
Chr4	15298600	15298999	498	590	491	493	186	0.395775	0.012215	up		AT1G36060	Chr1	13455200	13455599
Chr4	15368000	15368599	844	965	810	798	368	0.367783	0.0150992	up		AT1G05180	Chr1	1500800	1501599
Chr4	15422800	15423799	926	1155	970	818	667	0.32189	0.0360576	up		AT1G05850	Chr1	1768000	1768799
Chr4	1542400	1542999	599	796	666	600	320	0.406174	0.00721886	up		AT1G06520	Chr1	1995800	1996199
Chr4	15488800	15489199	460	611	473	456	316	0.34182	0.0341828	up		AT1G60940	Chr1	22439400	22439599
Chr4	15490600	15491199	640	905	685	670	380	0.362473	0.0211562	up		AT1G73870	Chr1	27779800	27780399
Chr4	15600800	15601399	586	696	586	517	382	0.321698	0.0439629	up		AT1G10390	Chr1	3407000	3407399
Chr4	15717600	15718599	873	1013	904	753	648	0.348853	0.0264767	up		AT1G10940	Chr1	3656000	3656199
Chr4	15780400	15781199	776	950	823	730	658	0.388156	0.0085868	up		AT1G27320	Chr1	9487200	9488199
Chr4	15895200	15896199	1024	1259	1148	993	718	0.44759	0.00158123	up		AT2G26430	Chr2	11245800	11246199
Chr4	15924800	15925599	972	1168	1022	830	493	0.328938	0.0378137	up		AT2G30250	Chr2	12903800	12904199
Chr4	15980200	15980599	289	417	353	348	245	0.541304	0.00104428	up		AT2G30580	Chr2	13026000	13026799
Chr4	16098800	16099399	696	824	713	623	356	0.351963	0.0228849	up		AT2G36750	Chr2	15410600	15411199
Chr4	16126200	16126999	721	922	809	685	548	0.405476	0.00725953	up		AT2G39940	Chr2	16675400	16675799
Chr4	16155400	16155799	336	449	403	344	296	0.47371	0.00383289	up		AT2G40340	Chr2	16850000	16850399
Chr4	16227200	16227799	439	564	446	442	387	0.36972	0.0213118	up		AT2G40350	Chr2	16852200	16852799
Chr4	16356400	16356799	513	623	502	490	286	0.34623	0.0290615	up		AT2G01940	Chr2	434400	434599
Chr4	16422000	16422399	542	658	581	468	312	0.344507	0.0385509	up		AT2G17730	Chr2	7704600	7705199
Chr4	16498800	16498999	294	324	343	268	135	0.516874	0.00371069	up		AT2G17840	Chr2	7756600	7757799
Chr4	16537000	16537599	507	653	511	490	388	0.332429	0.0363614	up		AT3G05640	Chr3	1640200	1640599
Chr4	1666600	1667599	817	1058	869	736	640	0.31918	0.0398933	up		AT3G47340	Chr3	17439600	17440199
Chr4	16712600	16712999	432	511	410	410	268	0.339004	0.0411457	up		AT3G48330	Chr3	17892600	17893599
Chr4	1673600	1674199	434	516	465	439	346	0.468476	0.00248929	up		AT3G51780	Chr3	19207200	19207999
Chr4	16837800	16838199	385	503	458	425	207	0.537159	0.000430585	up		AT3G06490	Chr3	2005800	2006199
Chr4	1688200	1688599	382	448	455	384	221	0.553164	0.000466329	up		AT3G60530	Chr3	22373200	22373599
Chr4	16940600	16941999	1112	1358	1145	1088	810	0.395971	0.00468337	up		AT3G08730	Chr3	2652800	2653199
Chr4	16957800	16958199	326	407	357	315	247	0.416652	0.0126256	up		AT3G08940	Chr3	2716800	2717799
Chr4	16958800	16959399	470	577	562	534	365	0.608037	2.53241e-05	up		AT3G09440	Chr3	2903000	2903399
Chr4	17004800	17005199	324	395	344	330	277	0.448664	0.006364	up		AT3G22170	Chr3	7822200	7822999
Chr4	17022000	17022399	751	977	872	746	285	0.44906	0.00225316	up		AT4G24020	Chr4	12480200	12480799
Chr4	17094400	17095199	557	669	625	549	414	0.476787	0.0014476	up		AT4G25200	Chr4	12917000	12917799
Chr4	17203400	17203999	533	632	518	512	445	0.3628	0.0216384	up		AT4G28880	Chr4	14251400	14251599
Chr4	17232400	17233799	2140	2694	2265	1905	978	0.32807	0.0244159	up		AT4G03260	Chr4	1428200	1428799
Chr4	17373200	17373399	168	211	270	195	170	0.834699	4.68078e-06	up		AT4G29770	Chr4	14576000	14576399
Chr4	17435000	17436199	1219	1442	1180	1109	685	0.321754	0.0270812	up		AT4G31120	Chr4	15132600	15133199
Chr4	17500000	17500399	503	649	541	454	286	0.33173	0.0433146	up		AT4G34530	Chr4	16498800	16498999
Chr4	17823200	17823599	366	448	436	411	230	0.599166	7.48264e-05	up		AT4G35110	Chr4	16712600	16712999
Chr4	17909200	17909999	772	914	814	737	521	0.418254	0.0042777	up		AT4G10250	Chr4	6370000	6370999
Chr4	17999800	18000399	538	682	582	541	437	0.42412	0.00486057	up		AT5G40280	Chr5	16102200	16102599
Chr4	18027200	18027999	893	1014	849	782	488	0.310436	0.0448554	up		AT5G42900	Chr5	17199000	17199999
Chr4	1830200	1830399	178	228	179	204	142	0.462273	0.0175227	up		AT5G47120	Chr5	19136400	19136999
Chr4	18407200	18408599	1083	1425	1186	1096	798	0.409986	0.00345418	up		AT5G52310	Chr5	21242800	21243199
Chr4	18437600	18438199	588	866	651	598	457	0.33411	0.0432022	up		AT5G07100	Chr5	2202400	2205599
Chr4	18574600	18575399	751	958	878	703	549	0.429125	0.0058637	up		AT5G61510	Chr5	24739400	24739999
Chr4	2080600	2080799	177	245	223	216	145	0.604896	0.000675249	up		AT5G62460	Chr5	25074800	25075199
Chr4	2284600	2285399	665	911	756	655	440	0.38805	0.0120037	up		AT5G63320	Chr5	25374400	25375399
Chr4	241400	242199	655	876	792	633	488	0.441092	0.00538872	up		AT5G63790	Chr5	25527200	25527599
Chr4	2498400	2498999	472	664	547	454	323	0.365833	0.0293597	up		AT5G63860	Chr5	25557600	25558399
Chr4	2524000	2525199	1041	1309	1061	1001	754	0.3548	0.0130484	up		AT5G64220	Chr5	25686400	25686799
Chr4	2545200	2546199	827	1110	868	777	713	0.311183	0.0420919	up		AT5G17310	Chr5	5699000	5699799
Chr4	2571400	2571799	399	489	440	424	297	0.502679	0.00110367	up		AT1G28760	Chr1	10103600	10104199
Chr4	2684800	2685199	324	372	324	297	207	0.373511	0.0312838	up		AT1G29220	Chr1	10212400	10212599
Chr4	300400	301199	812	937	841	672	465	0.325371	0.049572	up		AT1G04080	Chr1	1055200	1056199
Chr4	3008200	3008599	426	515	461	364	247	0.348388	0.0450871	up		AT1G30475	Chr1	10790600	10790999
Chr4	304000	304599	586	678	575	525	394	0.337074	0.033921	up		AT1G30480	Chr1	10790600	10790999
Chr4	3082600	3083199	560	725	557	569	354	0.355989	0.0236397	up		AT1G33250	Chr1	12058200	12058799
Chr4	320200	320999	684	889	685	711	517	0.375026	0.014478	up		AT1G34300	Chr1	12505000	12505399
Chr4	3265400	3265599	113	122	124	120	135	0.592494	0.00569718	up		AT1G35580	Chr1	13125000	13125399
Chr4	3389600	3390599	930	1034	945	888	541	0.435234	0.00322206	up		AT1G43130	Chr1	16228400	16228999
Chr4	3396600	3397199	536	625	531	510	357	0.381585	0.0149308	up		AT1G43170	Chr1	16268000	16268599
Chr4	349000	349799	726	811	714	646	562	0.358285	0.0222978	up		AT1G44820	Chr1	16926400	16926799
Chr4	3564800	3564999	193	225	216	192	141	0.504272	0.00637426	up		AT1G45120	Chr1	17055000	17056399
Chr4	3633400	3633799	514	638	537	478	203	0.358989	0.0228761	up		AT1G47310	Chr1	17341600	17342799
Chr4	3673000	3673199	183	192	241	195	126	0.750541	3.82746e-05	up		AT1G05860	Chr1	1768000	1768799
Chr4	3727800	3728199	381	532	398	393	202	0.343277	0.0427223	up		AT1G48040	Chr1	17721200	17721599
Chr4	3830600	3830999	488	625	580	501	285	0.50098	0.000905135	up		AT1G48420	Chr1	17898200	17898799
Chr4	3855000	3855999	847	1045	886	849	521	0.417423	0.00338121	up		AT1G48430	Chr1	17905400	17905799
Chr4	4212400	4213199	712	910	749	689	480	0.370325	0.0126269	up		AT1G05940	Chr1	1802600	1803399
Chr4	4310000	4310399	408	453	433	424	276	0.529943	0.000808336	up		AT1G48920	Chr1	18097800	18098399
Chr4	4363600	4363999	485	636	520	455	228	0.343448	0.0333569	up		AT1G49650	Chr1	18378800	18379599
Chr4	4368200	4368599	370	465	390	340	257	0.348292	0.0388547	up		AT1G50420	Chr1	18678000	18678399
Chr4	4386200	4386599	344	435	397	318	198	0.417561	0.0149342	up		AT1G53830	Chr1	20098600	20098999
Chr4	4394000	4394799	775	974	756	732	556	0.310662	0.0400983	up		AT1G06645	Chr1	2035200	2035799
Chr4	4459200	4459999	671	804	658	676	425	0.396743	0.00923889	up		AT1G06650	Chr1	2035200	2035799
Chr4	4467600	4468399	860	1070	898	778	476	0.337588	0.0252088	up		AT1G54580	Chr1	20389400	20389999
Chr4	4534800	4535399	574	744	583	555	357	0.333602	0.0322039	up		AT1G06700	Chr1	2054800	2055399
Chr4	4633000	4633599	500	637	535	515	359	0.429659	0.00473914	up		AT1G55680	Chr1	20805600	20805999
Chr4	4648000	4648399	350	461	375	337	238	0.357435	0.0339761	up		AT1G58030	Chr1	21467200	21467599
Chr4	4731200	4731799	708	839	723	638	381	0.353533	0.021288	up		AT1G60200	Chr1	22202000	22202599
Chr4	4737600	4738199	646	778	610	606	396	0.31366	0.0455942	up		AT1G60900	Chr1	22424400	22425599
Chr4	491000	491799	574	784	712	645	539	0.546928	0.000164408	up		AT1G07310	Chr1	2248000	2248399
Chr4	5004800	5005399	491	536	506	490	378	0.490877	0.00184157	up		AT1G61040	Chr1	22483200	22483599
Chr4	5023600	5024399	633	840	689	574	515	0.322914	0.0459533	up		AT1G07360	Chr1	2260800	2261599
Chr4	5069600	5070599	842	967	941	838	559	0.512069	0.000338424	up		AT1G61870	Chr1	22865600	22865999
Chr4	5169400	5170399	1079	1229	1021	939	614	0.300196	0.0492038	up		AT1G64142	Chr1	23803800	23804199
Chr4	5211600	5211999	414	538	457	416	312	0.419767	0.00797794	up		AT1G64370	Chr1	23888800	23888999
Chr4	5249000	5249399	475	629	486	520	323	0.414543	0.0100508	up		AT1G64460	Chr1	23945200	23945599
Chr4	5253400	5253799	337	436	353	321	248	0.346684	0.041746	up		AT1G64470	Chr1	23945200	23945599
Chr4	528200	528599	408	496	457	413	288	0.485437	0.00175354	up		AT1G07870	Chr1	2430000	2430599
Chr4	5315000	5315199	177	254	205	201	185	0.463584	0.0141975	up		AT1G07910	Chr1	2445800	2446399
Chr4	5462400	5462999	725	955	739	704	331	0.327258	0.0311928	up		AT1G67120	Chr1	25072200	25072399
Chr4	5566200	5566799	623	840	696	579	468	0.347402	0.0310738	up		AT1G67230	Chr1	25153000	25153999
Chr4	5583800	5584599	743	960	973	896	737	0.678955	3.58363e-07	up		AT1G67820	Chr1	25430200	25430999
Chr4	5608000	5608399	404	469	410	380	224	0.394342	0.0159593	up		AT1G68110	Chr1	25524600	25525399
Chr4	5829000	5829599	564	677	603	506	419	0.376242	0.0183065	up		AT1G69540	Chr1	26147000	26147599
Chr4	5974800	5974999	339	400	399	355	129	0.567966	0.000314265	up		AT1G08300	Chr1	2616800	2617199
Chr4	6100600	6100999	487	654	580	548	330	0.53091	0.000325307	up		AT1G70690	Chr1	26652000	26652399
Chr4	6249000	6249399	326	378	359	336	270	0.520269	0.00129294	up		AT1G71530	Chr1	26938400	26939199
Chr4	6370000	6370999	994	1192	1051	984	614	0.436726	0.00178155	up		AT1G72150	Chr1	27148800	27148999
Chr4	6442800	6443399	529	684	565	503	396	0.360513	0.0214865	up		AT1G08700	Chr1	2770200	2771399
Chr4	6456800	6457799	990	1251	992	912	634	0.308178	0.036525	up		AT1G08710	Chr1	2770200	2771399
Chr4	6590000	6590799	788	956	840	691	394	0.350608	0.025831	up		AT1G73740	Chr1	27734200	27734599
Chr4	6605800	6606199	391	466	454	415	286	0.559866	0.000244339	up		AT1G73875	Chr1	27779800	27780399
Chr4	6726800	6727599	612	671	605	559	427	0.393757	0.0132335	up		AT1G73950	Chr1	27805200	27805599
Chr4	6805000	6806199	1179	1514	1352	1156	841	0.440386	0.00186706	up		AT1G75230	Chr1	28234400	28234799
Chr4	7220400	7221599	1579	1888	1561	1402	913	0.31217	0.0302511	up		AT1G75240	Chr1	28242400	28242799
Chr4	7233400	7233799	449	509	499	430	227	0.491328	0.00193627	up		AT1G75370	Chr1	28279200	28279799
Chr4	7349800	7349999	201	223	253	224	149	0.706692	4.4633e-05	up		AT1G75400	Chr1	28297400	28297799
Chr4	7507000	7508799	1887	2212	1876	1662	1133	0.324637	0.0243195	up		AT1G08910	Chr1	2860200	2860799
Chr4	7514600	7514799	199	233	219	238	172	0.622959	0.000475899	up		AT1G76250	Chr1	28608400	28608999
Chr4	8165000	8165199	199	252	227	208	150	0.491165	0.00660655	up		AT1G76390	Chr1	28655800	28656599
Chr4	825800	826399	521	692	562	492	320	0.342894	0.0322488	up		AT1G76600	Chr1	28746800	28747399
Chr4	8259400	8260599	1060	1378	1055	1044	767	0.330639	0.0239066	up		AT1G76820	Chr1	28838000	28838999
Chr4	8330200	8330799	542	630	535	478	451	0.327254	0.0431978	up		AT1G01810	Chr1	294800	295599
Chr4	8360800	8361199	377	542	402	392	248	0.340882	0.0470905	up		AT1G78670	Chr1	29589800	29590599
Chr4	8374600	8375599	1062	1224	1009	977	642	0.334823	0.0246658	up		AT1G79730	Chr1	30000800	30001199
Chr4	8414600	8415399	770	1001	800	767	566	0.369351	0.0121887	up		AT1G09320	Chr1	3011600	3011999
Chr4	8493400	8493799	392	465	444	387	187	0.494338	0.00177786	up		AT1G80670	Chr1	30324200	30324599
Chr4	8516600	8517599	901	1138	928	887	587	0.376055	0.00892541	up		AT1G80890	Chr1	30397000	30397199
Chr4	855400	855999	493	627	516	456	382	0.338568	0.0348613	up		AT1G80960	Chr1	30416200	30416999
Chr4	8651400	8651799	449	601	545	494	286	0.531303	0.000396891	up		AT1G09460	Chr1	3054000	3054199
Chr4	8793200	8793999	618	716	629	627	507	0.452137	0.00268161	up		AT1G09770	Chr1	3162200	3163599
Chr4	8922600	8922999	426	510	422	393	297	0.340584	0.0383639	up		AT1G10150	Chr1	3325800	3326799
Chr4	8959600	8959799	182	236	218	188	193	0.501589	0.00680506	up		AT1G10500	Chr1	3461000	3461599
Chr4	901200	902199	961	1198	1029	887	673	0.368903	0.0123569	up		AT1G12470	Chr1	4251400	4252399
Chr4	9175600	9176599	854	1142	971	903	610	0.456357	0.0012552	up		AT1G12640	Chr1	4305000	4306199
Chr4	9205400	9206199	747	1023	831	790	495	0.422408	0.00410087	up		AT1G12650	Chr1	4305000	4306199
Chr4	962200	962799	553	628	551	556	349	0.444718	0.00425905	up		AT1G12760	Chr1	4348000	4348199
Chr4	9641400	9641999	543	669	551	559	363	0.41647	0.00664229	up		AT1G13520	Chr1	4631800	4632199
Chr4	9652600	9653399	1081	1358	1130	968	608	0.324293	0.0302206	up		AT1G15110	Chr1	5199200	5200199
Chr4	9928600	9929199	677	760	711	700	432	0.510351	0.000559979	up		AT1G15440	Chr1	5307000	5307199
Chr5	10014400	10014799	258	324	285	258	224	0.442653	0.0105906	up		AT1G15860	Chr1	5453400	5454199
Chr5	10097800	10098999	863	1107	951	887	707	0.444497	0.0015301	up		AT1G16240	Chr1	5556800	5557799
Chr5	10279000	10279399	302	438	352	341	252	0.457031	0.0070068	up		AT1G16250	Chr1	5556800	5557799
Chr5	10300800	10301199	592	708	626	552	244	0.3969	0.00975938	up		AT1G19160	Chr1	6614000	6614599
Chr5	10357800	10358399	692	794	712	617	425	0.374787	0.0163146	up		AT1G19490	Chr1	6753800	6754199
Chr5	10363200	10363799	671	882	724	678	381	0.398595	0.00713862	up		AT1G21340	Chr1	7475800	7475999
Chr5	10364600	10364999	408	503	427	395	249	0.393609	0.0142476	up		AT1G22200	Chr1	7840000	7840599
Chr5	10379800	10380999	1359	1744	1414	1276	822	0.337994	0.0173924	up		AT1G22350	Chr1	7892800	7893399
Chr5	10685000	10685399	273	382	314	291	254	0.434199	0.0117195	up		AT1G22790	Chr1	8070000	8070799
Chr5	10811000	10811999	869	1098	844	833	542	0.314424	0.0358247	up		AT1G23400	Chr1	8312000	8312399
Chr5	1082400	1082599	138	181	209	149	161	0.708133	0.000304768	up		AT1G24706	Chr1	8748800	8749199
Chr5	11046600	11047799	1390	1676	1465	1280	619	0.379368	0.0076996	up		AT1G26420	Chr1	9142600	9143399
Chr5	1129800	1130199	479	598	618	446	256	0.520782	0.00258698	up		AT1G26660	Chr1	9210600	9211199
Chr5	11399600	11400599	727	930	848	734	555	0.476201	0.000990556	up		AT1G26800	Chr1	9285600	9285999
Chr5	11475200	11475999	701	976	759	693	426	0.341795	0.0280079	up		AT1G28330	Chr1	9933800	9934399
Chr5	11569800	11570799	787	995	967	778	681	0.510609	0.000651116	up		AT1G28420	Chr1	9982800	9983199
Chr5	11584400	11584999	606	768	626	561	350	0.331976	0.0327363	up		AT2G25110	Chr2	10684000	10685599
Chr5	11647800	11648399	501	668	618	533	302	0.523155	0.000498152	up		AT2G25760	Chr2	10987800	10988599
Chr5	11766400	11766999	611	750	647	535	368	0.336168	0.0374808	up		AT2G03890	Chr2	1188200	1188599
Chr5	11912200	11912999	698	839	741	653	371	0.398372	0.00791706	up		AT2G27950	Chr2	11900000	11900599
Chr5	11943800	11944199	2200	2737	2427	2140	1117	0.4289	0.00136695	up		AT2G28370	Chr2	12131600	12132199
Chr5	1197800	1198199	543	691	601	470	259	0.336636	0.0480217	up		AT2G29020	Chr2	12470400	12470799
Chr5	11988600	11988999	651	914	777	633	351	0.397763	0.0142147	up		AT2G29740	Chr2	12706600	12706999
Chr5	12074800	12075399	526	749	629	528	378	0.409331	0.0119357	up		AT2G32660	Chr2	13854600	13855199
Chr5	12078400	12078999	642	853	686	617	372	0.347862	0.0238855	up		AT2G34840	Chr2	14702400	14702799
Chr5	12164800	12165599	508	679	584	547	531	0.477324	0.00141293	up		AT2G36850	Chr2	15455400	15455999
Chr5	12323400	12324599	1193	1590	1302	1128	787	0.350302	0.0175118	up		AT2G04460	Chr2	1549400	1549599
Chr5	12331400	12331599	315	407	333	301	138	0.356706	0.0380658	up		AT2G38490	Chr2	16114200	16115399
Chr5	12350600	12350999	385	432	388	369	209	0.426902	0.00980541	up		AT2G39720	Chr2	16567600	16567799
Chr5	12362000	12363199	1026	1299	1069	940	692	0.331855	0.0243975	up		AT2G39950	Chr2	16679600	16679999
Chr5	12520600	12521399	791	1018	899	703	451	0.366299	0.0246053	up		AT2G41231	Chr2	17195200	17195599
Chr5	1259800	1260799	771	988	828	718	651	0.356979	0.0181373	up		AT2G41640	Chr2	17363400	17363599
Chr5	12615400	12615599	170	191	183	153	132	0.433584	0.0311634	up		AT2G41750	Chr2	17422000	17422599
Chr5	12627800	12627999	185	208	208	187	135	0.545134	0.00334051	up		AT2G42250	Chr2	17602600	17602999
Chr5	12641000	12642199	854	1205	941	884	628	0.377246	0.0125158	up		AT2G44430	Chr2	18335800	18336199
Chr5	12719200	12719599	402	438	459	395	231	0.557301	0.000537299	up		AT2G44520	Chr2	18380400	18380999
Chr5	12744400	12745199	686	879	769	720	472	0.472676	0.000906014	up		AT2G44970	Chr2	18551800	18552399
Chr5	12747800	12748199	376	402	453	407	215	0.67779	1.56864e-05	up		AT2G05300	Chr2	1931800	1932399
Chr5	12751200	12751799	478	594	584	525	384	0.590827	4.7345e-05	up		AT2G02148	Chr2	547600	547999
Chr5	12768400	12769399	1077	1265	1055	950	635	0.313634	0.0358247	up		AT2G02180	Chr2	561200	561999
Chr5	12770800	12771399	515	580	520	469	363	0.388934	0.0154741	up		AT2G13970	Chr2	5861800	5862399
Chr5	12923800	12924399	607	672	628	568	378	0.437671	0.00489823	up		AT2G14830	Chr2	6365200	6365599
Chr5	12929400	12929799	375	451	391	378	271	0.43804	0.00649638	up		AT2G15430	Chr2	6733200	6734599
Chr5	12939600	12939999	446	433	486	396	258	0.52942	0.00323652	up		AT2G17410	Chr2	7559800	7560199
Chr5	12951600	12952199	456	554	486	452	355	0.434401	0.00505656	up		AT2G17787	Chr2	7731800	7732199
Chr5	12990600	12990999	436	569	435	428	334	0.326465	0.0467646	up		AT2G17880	Chr2	7767000	7767799
Chr5	13001800	13002999	1267	1611	1260	1175	789	0.302856	0.0357248	up		AT2G18220	Chr2	7931400	7931799
Chr5	13144200	13144799	570	621	560	537	317	0.415912	0.00915672	up		AT2G19270	Chr2	8360800	8361399
Chr5	13165400	13165799	339	414	343	358	227	0.439964	0.00822833	up		AT2G19540	Chr2	8462400	8462999
Chr5	13186000	13187599	1347	1766	1469	1208	997	0.326153	0.0335902	up		AT2G20330	Chr2	8774600	8774999
Chr5	13419200	13419799	595	671	607	527	414	0.376139	0.0188795	up		AT2G20560	Chr2	8849000	8849999
Chr5	13538200	13538599	439	466	475	407	215	0.49437	0.00288166	up		AT2G23120	Chr2	9841800	9842199
Chr5	135600	136199	476	659	632	535	385	0.587685	0.00010358	up		AT3G28210	Chr3	10520200	10520599
Chr5	1361200	1362999	1985	2322	1890	1776	1108	0.30549	0.0325354	up		AT3G04350	Chr3	1153800	1154599
Chr5	13639800	13640399	562	737	587	523	359	0.318268	0.0453064	up		AT3G42052	Chr3	14241400	14242199
Chr5	141000	141399	402	421	407	329	262	0.368689	0.0439571	up		AT3G42385	Chr3	14508800	14509599
Chr5	14116400	14117199	677	827	697	646	472	0.377866	0.0114078	up		AT3G46060	Chr3	16918000	16918399
Chr5	14233800	14234999	973	1190	991	880	730	0.331172	0.0252743	up		AT3G47620	Chr3	17558800	17559799
Chr5	14274000	14274799	851	982	859	769	470	0.365519	0.0153567	up		AT3G48870	Chr3	18126200	18126599
Chr5	1429800	1430199	475	626	469	475	261	0.32542	0.0464573	up		AT3G48880	Chr3	18126200	18126599
Chr5	1472800	1473399	526	647	547	473	431	0.338973	0.034749	up		AT3G06080	Chr3	1836400	1836799
Chr5	1477000	1477999	1176	1475	1304	1122	680	0.41355	0.00366729	up		AT3G50350	Chr3	18673000	18673199
Chr5	15268800	15268999	201	242	205	196	162	0.39778	0.0358629	up		AT3G06180	Chr3	1871600	1872799
Chr5	1548600	1549199	493	550	546	477	451	0.5068	0.00117067	up		AT3G06200	Chr3	1877600	1878599
Chr5	15641800	15642599	548	763	726	616	474	0.581841	9.92278e-05	up		AT3G51370	Chr3	19068400	19069599
Chr5	15813800	15814799	1035	1368	1102	968	693	0.330401	0.0264284	up		AT3G51520	Chr3	19110800	19111199
Chr5	15974400	15975199	637	863	720	683	488	0.451899	0.00214009	up		AT3G51670	Chr3	19168800	19169399
Chr5	16032200	16032799	660	897	726	632	397	0.349861	0.025331	up		AT3G52220	Chr3	19369600	19369799
Chr5	1606600	1606999	438	499	518	459	289	0.596796	8.24988e-05	up		AT3G52490	Chr3	19456400	19456999
Chr5	16102200	16102599	386	436	397	333	289	0.364098	0.0359149	up		AT3G52800	Chr3	19569400	19569999
Chr5	16334800	16335799	877	1090	879	810	722	0.322372	0.0296914	up		AT3G53030	Chr3	19663000	19663799
Chr5	16449400	16450199	763	982	761	712	508	0.300338	0.0486113	up		AT3G54230	Chr3	20073800	20074799
Chr5	16477400	16478199	805	977	787	754	594	0.331667	0.0267198	up		AT3G54363	Chr3	20132400	20133399
Chr5	16534600	16534999	513	602	641	544	370	0.625139	2.3244e-05	up		AT3G54366	Chr3	20132400	20133399
Chr5	1678600	1679199	498	618	591	518	379	0.532286	0.000328658	up		AT3G54680	Chr3	20244400	20244999
Chr5	16797000	16797799	1008	1308	1037	929	571	0.308294	0.0380984	up		AT3G54820	Chr3	20301800	20302199
Chr5	16809400	16810199	773	848	741	664	535	0.326962	0.0419521	up		AT3G55980	Chr3	20777800	20778599
Chr5	16831000	16831399	460	570	504	426	317	0.393405	0.0146732	up		AT3G57890	Chr3	21437800	21439199
Chr5	16844200	16844599	417	526	436	407	300	0.381662	0.0172695	up		AT3G57910	Chr3	21443200	21443599
Chr5	16942800	16942999	253	269	277	204	205	0.412833	0.03808	up		AT3G58050	Chr3	21494800	21495199
Chr5	16973400	16973799	536	585	543	478	294	0.398498	0.0147455	up		AT3G58750	Chr3	21726400	21727399
Chr5	170000	170599	529	678	605	513	383	0.432315	0.00526121	up		AT3G60260	Chr3	22274200	22274799
Chr5	17154600	17155199	595	781	652	585	405	0.391661	0.00998518	up		AT3G61800	Chr3	22877600	22877999
Chr5	17199000	17199999	961	1123	902	897	671	0.327129	0.0301536	up		AT3G62070	Chr3	22983600	22984399
Chr5	17256400	17256799	397	448	433	377	260	0.474795	0.00348337	up		AT3G07273	Chr3	2317600	2318199
Chr5	17424200	17424599	301	391	435	388	243	0.794354	1.14268e-07	up		AT3G63010	Chr3	23289400	23290599
Chr5	1743400	1744399	899	1086	936	849	646	0.386749	0.00757206	up		AT3G07350	Chr3	2347800	2348199
Chr5	17454200	17454799	576	688	571	522	377	0.32993	0.0364432	up		AT3G07760	Chr3	2476200	2476399
Chr5	1755800	1756799	920	1036	958	811	642	0.388773	0.0120368	up		AT3G08930	Chr3	2716800	2717799
Chr5	1757400	1757799	417	511	424	394	252	0.359609	0.0270889	up		AT3G08990	Chr3	2743000	2744199
Chr5	17604200	17604999	681	845	687	633	434	0.332912	0.0287159	up		AT3G09840	Chr3	3019200	3020799
Chr5	17681200	17681599	413	554	506	413	259	0.471519	0.00366729	up		AT3G10370	Chr3	3216200	3216799
Chr5	17838400	17838999	835	880	814	687	395	0.336833	0.0461274	up		AT3G10410	Chr3	3237400	3237799
Chr5	1804000	1804399	408	439	468	411	284	0.586499	0.000232914	up		AT3G10530	Chr3	3286400	3286999
Chr5	18115800	18116399	647	780	726	569	316	0.397312	0.0151979	up		AT3G11440	Chr3	3604200	3604399
Chr5	18235800	18236199	365	496	407	372	220	0.402947	0.0140993	up		AT3G11450	Chr3	3606200	3606599
Chr5	18272600	18272799	266	314	287	248	125	0.422421	0.0170013	up		AT3G11450	Chr3	3608400	3609199
Chr5	18277600	18278399	733	1017	826	735	543	0.384114	0.0118041	up		AT3G11670	Chr3	3683200	3684199
Chr5	18340400	18340999	960	1103	1043	799	479	0.369603	0.027689	up		AT3G12140	Chr3	3871000	3871399
Chr5	1838200	1838599	402	467	461	435	243	0.582935	0.000123223	up		AT3G12587	Chr3	3994800	3995399
Chr5	18426800	18427599	583	729	675	668	509	0.57754	4.53555e-05	up		AT3G13224	Chr3	4253800	4253999
Chr5	18432400	18432999	545	683	723	580	386	0.625888	3.08105e-05	up		AT3G14570	Chr3	4892400	4892799
Chr5	18445400	18445799	416	447	424	392	287	0.452948	0.00626133	up		AT3G02420	Chr3	498200	498599
Chr5	18486600	18487199	509	570	486	494	365	0.398543	0.0140212	up		AT3G15340	Chr3	5160400	5160799
Chr5	1865800	1866199	435	527	487	388	270	0.401667	0.0169616	up		AT3G15530	Chr3	5253200	5253999
Chr5	188800	189399	728	906	777	653	382	0.348302	0.0251693	up		AT3G15970	Chr3	5409200	5410199
Chr5	19136400	19136999	540	698	551	523	411	0.340183	0.0298358	up		AT3G17810	Chr3	6095000	6095399
Chr5	19158600	19158799	194	253	245	204	138	0.549885	0.00225582	up		AT3G18550	Chr3	6383800	6384199
Chr5	19193200	19193799	475	657	527	479	337	0.378419	0.0180779	up		AT3G18930	Chr3	6524600	6525199
Chr5	19202000	19202599	539	645	552	520	335	0.39692	0.00989014	up		AT3G20010	Chr3	6970800	6970999
Chr5	19253400	19253799	391	469	471	408	255	0.570838	0.000205877	up		AT3G20270	Chr3	7066000	7066799
Chr5	19294000	19295399	1065	1348	1149	1096	799	0.439968	0.00136664	up		AT3G21650	Chr3	7623400	7623799
Chr5	19338600	19338999	391	506	446	344	318	0.358712	0.0426342	up		AT3G21650	Chr3	7624200	7625399
Chr5	19348000	19348799	872	1080	945	807	599	0.384627	0.00973552	up		AT3G22460	Chr3	7962600	7963199
Chr5	19380200	19381199	1235	1634	1311	1168	698	0.335202	0.0211631	up		AT3G23620	Chr3	8479000	8479399
Chr5	19497200	19497599	421	520	415	394	237	0.324359	0.0493661	up		AT3G23710	Chr3	8534000	8534799
Chr5	1952600	1953199	538	655	572	507	429	0.395456	0.0106066	up		AT3G24518	Chr3	8943000	8943399
Chr5	19597200	19597799	570	732	588	551	401	0.351641	0.0227184	up		AT3G26400	Chr3	9666800	9667599
Chr5	19666200	19666399	155	194	171	164	165	0.484206	0.0130856	up		AT3G26580	Chr3	9759200	9760199
Chr5	1989800	1990999	1243	1641	1290	1162	778	0.311931	0.0329992	up		AT4G19190	Chr4	10495200	10496199
Chr5	19900200	19900599	446	590	514	440	299	0.425941	0.00741599	up		AT4G19191	Chr4	10495200	10496199
Chr5	20048600	20049199	881	1051	909	770	372	0.335359	0.0297073	up		AT4G21710	Chr4	11542200	11542799
Chr5	20151200	20152399	1287	1529	1259	1122	795	0.2962	0.0458328	up		AT4G22190	Chr4	11742000	11742599
Chr5	2027200	2027799	747	1003	845	717	438	0.381999	0.0128412	up		AT4G22740	Chr4	11946400	11947399
Chr5	20319200	20319399	225	284	250	229	181	0.455489	0.0104447	up		AT4G23540	Chr4	12280600	12281199
Chr5	20320600	20320999	582	644	578	512	265	0.364521	0.0247803	up		AT4G23630	Chr4	12316000	12316199
Chr5	20341000	20341999	1172	1440	1243	1063	749	0.360169	0.0140884	up		AT4G24015	Chr4	12470800	12471199
Chr5	20349400	20349799	346	466	371	340	249	0.355171	0.0358247	up		AT4G24680	Chr4	12732600	12732799
Chr5	20459000	20459399	510	625	487	492	282	0.32957	0.0409459	up		AT4G24972	Chr4	12837400	12838199
Chr5	20538000	20538199	289	338	331	261	144	0.453993	0.0108246	up		AT4G25570	Chr4	13055000	13055599
Chr5	20794800	20795399	471	627	549	507	354	0.49023	0.0011256	up		AT4G25730	Chr4	13102800	13103999
Chr5	20885600	20886599	952	1120	981	879	686	0.382157	0.00906366	up		AT4G25730	Chr4	13106000	13106399
Chr5	21048400	21048999	413	533	508	384	447	0.456587	0.00783558	up		AT4G25730	Chr4	13107400	13107799
Chr5	21159600	21159999	368	467	467	347	287	0.503362	0.00369031	up		AT4G27585	Chr4	13768800	13769599
Chr5	21242800	21243199	434	573	505	384	313	0.363128	0.0400091	up		AT4G27880	Chr4	13883800	13884199
Chr5	2127000	2127399	376	494	509	395	261	0.598152	0.000228025	up		AT4G27940	Chr4	13904600	13905799
Chr5	21326000	21326399	483	544	522	436	297	0.434239	0.00791531	up		AT4G00335	Chr4	146000	146399
Chr5	21484400	21484799	413	484	418	394	246	0.395625	0.0147251	up		AT4G30460	Chr4	14889200	14889599
Chr5	21486400	21487599	1176	1589	1269	1083	806	0.313308	0.0402982	up		AT4G30570	Chr4	14930800	14931599
Chr5	21500000	21501399	1204	1560	1238	1124	920	0.31809	0.0281613	up		AT4G30680	Chr4	14958600	14959999
Chr5	2165600	2165999	469	485	474	403	254	0.408061	0.0192955	up		AT4G31040	Chr4	15111800	15112199
Chr5	21686000	21686399	354	417	369	317	290	0.369801	0.0308992	up		AT4G31240	Chr4	15179000	15179399
Chr5	2202400	2205599	2418	3057	2584	2459	1967	0.425449	0.00112403	up		AT4G31430	Chr4	15252200	15252999
Chr5	22104600	22105199	454	585	533	468	327	0.489944	0.00130794	up		AT4G31540	Chr4	15285000	15285399
Chr5	22152600	22152999	416	527	458	382	282	0.375043	0.0238154	up		AT4G31750	Chr4	15368000	15368599
Chr5	22309000	22310199	1102	1209	1085	984	736	0.373406	0.0141744	up		AT4G32020	Chr4	15488800	15489199
Chr5	22330800	22331799	1146	1471	1164	1045	762	0.299439	0.0419271	up		AT4G32030	Chr4	15490600	15491199
Chr5	22375400	22375999	458	573	494	492	403	0.479545	0.00162807	up		AT4G32300	Chr4	15600800	15601399
Chr5	22435800	22436599	694	916	744	669	559	0.357468	0.0182861	up		AT4G33460	Chr4	16098800	16099399
Chr5	22594400	22595599	1086	1327	1078	959	772	0.295946	0.0471264	up		AT4G33630	Chr4	16155400	16155799
Chr5	22647600	22648599	852	983	779	785	615	0.308165	0.0482851	up		AT4G35440	Chr4	16837800	16838199
Chr5	22715400	22715799	362	447	388	352	282	0.413148	0.011363	up		AT4G35750	Chr4	16940600	16941999
Chr5	2275200	2275999	712	841	776	673	620	0.437788	0.00333465	up		AT4G35940	Chr4	17022000	17022399
Chr5	22758600	22759399	658	782	652	596	552	0.332757	0.031652	up		AT4G36870	Chr4	17373200	17373399
Chr5	23098200	23098999	779	941	794	736	470	0.371541	0.0118041	up		AT4G38470	Chr4	17999800	18000399
Chr5	23234200	23234599	415	505	464	361	221	0.381101	0.0280281	up		AT4G39660	Chr4	18407200	18408599
Chr5	23317600	23317999	418	522	455	414	300	0.429103	0.00638638	up		AT4G00560	Chr4	241400	242199
Chr5	23454800	23455599	638	824	740	668	505	0.490069	0.000657311	up		AT4G07507	Chr4	4310000	4310399
Chr5	23491800	23492199	432	554	502	444	268	0.483774	0.00163865	up		AT4G08180	Chr4	5169400	5170399
Chr5	23536000	23536799	721	799	726	679	427	0.421348	0.00582862	up		AT4G08320	Chr4	5253400	5253799
Chr5	23549600	23550599	832	1041	821	809	674	0.34336	0.0205984	up		AT4G08580	Chr4	5462400	5462999
Chr5	23558800	23559799	787	992	884	756	716	0.424451	0.00398548	up		AT4G09150	Chr4	5829000	5829599
Chr5	23680200	23680599	494	633	518	467	266	0.34952	0.027675	up		AT4G10710	Chr4	6605800	6606199
Chr5	23694000	23694399	380	407	399	372	255	0.504279	0.00222071	up		AT4G12050	Chr4	7220400	7221599
Chr5	2374600	2374999	379	366	396	373	202	0.573309	0.00101439	up		AT4G15180	Chr4	8651400	8651799
Chr5	23778400	23779399	976	1210	1029	879	515	0.344384	0.0215778	up		AT5G32450	Chr5	12078400	12078999
Chr5	23803000	23803399	516	552	481	465	316	0.358651	0.0330777	up		AT5G04720	Chr5	1361200	1362999
Chr5	23807000	23807599	681	837	736	628	463	0.385837	0.0115914	up		AT5G05210	Chr5	1548600	1549199
Chr5	23830200	23830599	453	542	444	422	333	0.340195	0.0365634	up		AT5G39080	Chr5	15641800	15642599
Chr5	23976000	23976399	378	419	405	378	228	0.510417	0.00153847	up		AT5G41100	Chr5	16449400	16450199
Chr5	24012400	24012799	328	431	369	385	243	0.537781	0.000799217	up		AT5G05610	Chr5	1678600	1679199
Chr5	24064000	24064599	614	876	687	610	390	0.350544	0.0291198	up		AT5G41992	Chr5	16797000	16797799
Chr5	24073000	24073799	624	852	671	639	478	0.376784	0.0138587	up		AT5G01400	Chr5	170000	170599
Chr5	24120400	24120999	618	764	621	564	408	0.319802	0.0400163	up		AT5G05800	Chr5	1743400	1744399
Chr5	24184600	24184999	374	437	359	345	280	0.33534	0.049206	up		AT5G44280	Chr5	17838400	17838999
Chr5	24207800	24208599	637	715	604	663	577	0.444832	0.00590251	up		AT5G05987	Chr5	1804000	1804399
Chr5	24260800	24261399	631	832	755	656	381	0.492848	0.000770341	up		AT5G45190	Chr5	18277600	18278399
Chr5	24461000	24461999	1020	1089	1158	937	683	0.519148	0.00101127	up		AT5G06100	Chr5	1838200	1838599
Chr5	24545600	24546199	519	677	591	492	530	0.400452	0.0119462	up		AT5G06160	Chr5	1865800	1866199
Chr5	24662200	24662999	1101	1375	1150	1003	637	0.339821	0.0204615	up		AT5G47310	Chr5	19202000	19202599
Chr5	24739400	24739999	509	632	527	543	458	0.45135	0.00327224	up		AT5G47860	Chr5	19380200	19381199
Chr5	24743400	24744199	686	794	676	627	419	0.353925	0.0215361	up		AT5G49110	Chr5	19900200	19900599
Chr5	24821600	24821799	220	253	240	191	113	0.402673	0.036328	up		AT5G49440	Chr5	20048600	20049199
Chr5	24880600	24881399	578	844	728	673	497	0.531367	0.000448741	up		AT5G49640	Chr5	20151200	20152399
Chr5	24911000	24912199	980	1316	990	947	799	0.302947	0.04349	up		AT5G49990	Chr5	20341000	20341999
Chr5	24919200	24919999	674	839	804	689	456	0.521854	0.000301098	up		AT5G50430	Chr5	20538000	20538199
Chr5	24950400	24951199	773	861	771	673	446	0.355499	0.0246304	up		AT5G51170	Chr5	20794800	20795399
Chr5	25074800	25075199	421	509	464	420	250	0.467246	0.00268072	up		AT5G52545	Chr5	21326000	21326399
Chr5	2530800	2531199	410	513	427	382	249	0.352086	0.0319688	up		AT5G52980	Chr5	21484400	21484799
Chr5	25374400	25375399	1165	1448	1240	1035	763	0.340452	0.0239684	up		AT5G53440	Chr5	21686000	21686399
Chr5	25477600	25478199	703	830	753	630	456	0.388556	0.0126278	up		AT5G54530	Chr5	22152600	22152999
Chr5	25527200	25527599	288	387	302	298	249	0.377572	0.0300778	up		AT5G54940	Chr5	22309000	22310199
Chr5	25557600	25558399	652	849	675	626	521	0.339069	0.0264284	up		AT5G55040	Chr5	22330800	22331799
Chr5	25626800	25627599	555	764	579	587	479	0.372525	0.0187394	up		AT5G07250	Chr5	2275200	2275999
Chr5	25686400	25686799	438	509	494	450	318	0.533571	0.000467628	up		AT5G57580	Chr5	23317600	23317999
Chr5	25731400	25731999	515	594	529	482	347	0.404015	0.0101933	up		AT5G58040	Chr5	23491800	23492199
Chr5	25759800	25760199	379	503	417	373	271	0.38675	0.0183838	up		AT5G58200	Chr5	23549600	23550599
Chr5	25780800	25781999	1043	1239	1035	900	735	0.299969	0.0491236	up		AT5G58590	Chr5	23680200	23680599
Chr5	25941000	25941399	545	652	619	474	317	0.405463	0.0167447	up		AT5G58950	Chr5	23803000	23803399
Chr5	26013000	26013399	424	474	491	437	289	0.582888	0.000159966	up		AT5G59880	Chr5	24120400	24120999
Chr5	26175800	26176399	622	794	661	561	400	0.330013	0.0376248	up		AT5G60120	Chr5	24207800	24208599
Chr5	26221800	26222799	1011	1388	1160	979	659	0.382068	0.0119755	up		AT5G60800	Chr5	24461000	24461999
Chr5	26261400	26261799	509	680	547	504	302	0.368769	0.0187842	up		AT5G61530	Chr5	24743400	24744199
Chr5	26364800	26365399	525	630	558	524	417	0.44623	0.00312787	up		AT5G61960	Chr5	24880600	24881399
Chr5	26415600	26416799	986	1194	953	943	783	0.340299	0.0205842	up		AT5G62000	Chr5	24911000	24912199
Chr5	26417800	26418199	382	491	381	410	238	0.404359	0.015444	up		AT5G62030	Chr5	24919200	24919999
Chr5	26451200	26451799	485	660	610	519	405	0.526289	0.000566364	up		AT5G62130	Chr5	24950400	24951199
Chr5	26497400	26497799	590	745	606	540	264	0.322482	0.0400091	up		AT5G63640	Chr5	25477600	25478199
Chr5	26521000	26521999	964	1054	881	854	610	0.316153	0.0456755	up		AT5G64420	Chr5	25759800	25760199
Chr5	26619600	26620399	769	911	740	704	532	0.321184	0.0351966	up		AT5G64500	Chr5	25780800	25781999
Chr5	26728000	26728799	754	871	743	672	555	0.337377	0.0287895	up		AT5G65110	Chr5	26013000	26013399
Chr5	26748800	26749599	619	758	594	579	443	0.310908	0.0471771	up		AT5G65480	Chr5	26175800	26176399
Chr5	26767800	26768199	495	711	535	511	333	0.346638	0.0349323	up		AT5G66052	Chr5	26415600	26416799
Chr5	26791600	26791799	203	194	212	201	121	0.587298	0.00227705	up		AT5G09570	Chr5	2970800	2971399
Chr5	26832800	26833599	883	1097	922	808	537	0.346537	0.0199246	up		AT5G10650	Chr5	3367000	3367799
Chr5	26868400	26868999	589	711	677	603	427	0.517457	0.000372163	up		AT5G10695	Chr5	3376800	3377199
Chr5	26872200	26872799	412	563	512	517	380	0.62721	2.75184e-05	up		AT5G12230	Chr5	3954400	3954799
Chr5	2731000	2732599	1647	2135	1724	1503	1177	0.315189	0.0295433	up		AT5G02150	Chr5	425400	426399
Chr5	2802400	2802999	990	1164	1016	860	482	0.337365	0.0280556	up		AT5G02160	Chr5	425400	426399
Chr5	294800	295199	398	475	404	428	194	0.472701	0.00342047	up		AT5G13800	Chr5	4453000	4453399
Chr5	2965200	2965399	177	175	172	154	150	0.421346	0.0436143	up		AT5G13820	Chr5	4461600	4461999
Chr5	2970800	2971399	580	750	599	550	421	0.333667	0.0321185	up		AT5G14120	Chr5	4556600	4556999
Chr5	2981200	2981599	582	709	665	489	312	0.375086	0.0338591	up		AT5G14440	Chr5	4656800	4656999
Chr5	3010600	3010999	300	387	325	311	261	0.433616	0.00957305	up		AT5G14570	Chr5	4695400	4695999
Chr5	3058800	3059399	665	826	702	645	420	0.395619	0.00762644	up		AT5G14690	Chr5	4733800	4734399
Chr5	3074200	3074799	522	673	643	586	456	0.584826	4.32278e-05	up		AT5G14830	Chr5	4797200	4797599
Chr5	3102600	3103599	961	1189	998	909	584	0.368628	0.0104772	up		AT5G14840	Chr5	4800800	4800999
Chr5	3127800	3128399	540	668	630	510	459	0.456182	0.00384387	up		AT5G14970	Chr5	4847200	4847999
Chr5	3351400	3351999	577	685	607	521	421	0.376214	0.0170353	up		AT5G15390	Chr5	4994800	4995999
Chr5	3367000	3367799	871	1110	877	792	535	0.296302	0.0497991	up		AT5G16505	Chr5	5391000	5391399
Chr5	3371200	3371599	749	891	852	690	288	0.448015	0.00373409	up		AT5G17170	Chr5	5649000	5650199
Chr5	3376800	3377199	274	365	313	307	220	0.50334	0.0024583	up		AT5G17390	Chr5	5727400	5728399
Chr5	351600	352199	607	788	642	578	369	0.35127	0.0225788	up		AT5G17900	Chr5	5925400	5925999
Chr5	3658400	3658799	370	530	424	368	264	0.365373	0.0333068	up		AT5G18420	Chr5	6107200	6107799
Chr5	3680000	3680599	546	708	551	552	372	0.361197	0.0208295	up		AT5G19300	Chr5	6495600	6495799
Chr5	3922600	3923199	513	603	479	483	371	0.326043	0.0458328	up		AT5G19480	Chr5	6572400	6572599
Chr5	3954400	3954799	377	447	421	359	269	0.459291	0.00482055	up		AT5G19485	Chr5	6575400	6576199
Chr5	4004000	4004599	598	793	652	561	377	0.347736	0.0276865	up		AT5G20300	Chr5	6856600	6856999
Chr5	4043000	4043599	535	634	567	503	395	0.411024	0.00801666	up		AT5G23080	Chr5	7745000	7745399
Chr5	4069600	4070999	1423	1779	1441	1342	909	0.340431	0.0151244	up		AT5G23480	Chr5	7916200	7916599
Chr5	423200	423799	476	625	518	476	409	0.398091	0.0107116	up		AT5G03290	Chr5	795000	795599
Chr5	4245800	4246399	671	761	637	599	333	0.324244	0.0407907	up		AT5G23710	Chr5	7996600	7996999
Chr5	425400	426399	1108	1408	1179	997	718	0.332678	0.0268259	up		AT5G03380	Chr5	832400	832999
Chr5	4255600	4255999	453	525	463	404	238	0.363451	0.0274447	up		AT5G27120	Chr5	9540000	9540399
Chr5	4336400	4336799	353	452	402	341	212	0.427183	0.00984516	up		AT5G27120	Chr5	9543200	9543799
Chr5	435400	436599	1114	1475	1229	1044	894	0.357337	0.0166987	up		AT5G27320	Chr5	9629200	9630199
Chr5	4446200	4446999	951	1143	998	902	514	0.399258	0.00541553	up		AT5G27690	Chr5	9804200	9804799
Chr5	4453000	4453399	464	589	495	455	241	0.395027	0.0115741	up
Chr5	4461600	4461999	365	467	433	360	248	0.473177	0.00365423	up
Chr5	4550600	4550999	340	395	333	326	258	0.382047	0.0250296	up
Chr5	4556600	4556999	402	422	380	390	240	0.436143	0.0115445	up
Chr5	4595200	4595999	1010	1270	1025	920	595	0.313245	0.0338937	up
Chr5	4633200	4633599	416	445	469	373	359	0.498525	0.00378209	up
Chr5	4656800	4656999	276	361	348	310	157	0.591372	0.000236067	up
Chr5	4695400	4695999	545	712	574	539	354	0.370169	0.0164323	up
Chr5	4710600	4711799	1414	1601	1561	1323	802	0.469583	0.001214	up
Chr5	4733800	4734399	549	635	593	535	393	0.467511	0.002046	up
Chr5	4797200	4797599	360	417	395	321	251	0.418442	0.0149842	up
Chr5	4800800	4800999	249	272	289	223	128	0.508051	0.00618931	up
Chr5	4847200	4847999	734	928	734	778	535	0.409367	0.00693732	up
Chr5	4975000	4975999	1006	1288	988	939	615	0.293292	0.0477278	up
Chr5	4994800	4995999	1013	1145	1042	903	788	0.384431	0.0111279	up
Chr5	5101800	5102399	656	813	661	603	317	0.325053	0.034623	up
Chr5	5122600	5123399	593	801	658	628	494	0.431843	0.00392045	up
Chr5	5168600	5168999	354	404	356	314	267	0.358903	0.0380736	up
Chr5	534000	534599	532	755	568	541	360	0.336513	0.0383248	up
Chr5	5391000	5391399	280	379	346	282	255	0.475733	0.0059096	up
Chr5	5607800	5608199	479	598	502	447	264	0.359492	0.0241111	up
Chr5	5649000	5650199	1088	1261	1055	967	759	0.320889	0.0315168	up
Chr5	5699000	5699799	635	752	642	568	517	0.341482	0.0290434	up
Chr5	5727400	5728399	943	1156	950	858	632	0.325571	0.0276983	up
Chr5	5925400	5925999	842	994	896	733	430	0.363907	0.0208608	up
Chr5	607600	607999	319	413	380	371	217	0.582407	0.000188184	up
Chr5	6107200	6107799	566	737	602	517	311	0.324437	0.0431308	up
Chr5	6138800	6139399	574	746	640	569	386	0.41777	0.00571142	up
Chr5	6150800	6151799	880	981	849	866	659	0.418649	0.00596448	up
Chr5	6333200	6333399	222	291	260	233	155	0.487295	0.0056217	up
Chr5	6468000	6468399	381	501	461	412	264	0.530307	0.000582691	up
Chr5	6471800	6472999	1131	1320	1130	1004	840	0.337218	0.0230382	up
Chr5	6479400	6480599	939	1157	1055	872	784	0.418282	0.00514766	up
Chr5	6495600	6495799	243	286	281	246	157	0.533612	0.0019388	up
Chr5	6572400	6572599	265	282	267	228	143	0.389215	0.0384932	up
Chr5	6575400	6576199	728	855	783	731	470	0.474414	0.000972444	up
Chr5	6656000	6656399	327	391	327	333	270	0.420164	0.0127051	up
Chr5	6856600	6856999	368	469	417	421	296	0.54688	0.000407857	up
Chr5	6981800	6981999	204	259	206	209	169	0.386721	0.0408215	up
Chr5	7192400	7193199	859	1037	847	853	595	0.384377	0.00905796	up
Chr5	7281800	7282199	349	424	387	352	261	0.476015	0.00300522	up
Chr5	736200	736599	379	464	417	383	250	0.465906	0.00319896	up
Chr5	7388200	7388799	669	779	755	636	447	0.478412	0.00155231	up
Chr5	7402200	7402599	427	488	444	406	283	0.430947	0.00736104	up
Chr5	7519000	7519399	443	528	452	432	246	0.404973	0.0106997	up
Chr5	7581600	7581799	183	176	222	175	150	0.673548	0.000581215	up
Chr5	7668800	7669199	389	470	419	390	239	0.454357	0.0041099	up
Chr5	7745000	7745399	276	333	329	287	224	0.556598	0.00073493	up
Chr5	7836000	7836599	523	665	552	492	380	0.356743	0.0232613	up
Chr5	7842600	7843199	435	579	506	499	427	0.534621	0.000385578	up
Chr5	7916200	7916599	396	514	417	418	227	0.422044	0.00843838	up
Chr5	795000	795599	491	609	545	478	386	0.43667	0.00462207	up
Chr5	7985400	7985999	1026	1119	1010	869	487	0.340614	0.0327439	up
Chr5	7996600	7996999	400	548	470	376	270	0.38175	0.0266321	up
Chr5	8303000	8303399	379	511	414	411	208	0.438773	0.00635446	up
Chr5	8309000	8309399	352	389	373	352	224	0.504632	0.00206866	up
Chr5	832400	832999	644	727	638	580	394	0.365047	0.0202105	up
Chr5	8791600	8791999	467	521	466	402	279	0.347842	0.0396986	up
Chr5	8935000	8935399	429	490	468	359	286	0.381943	0.0317453	up
Chr5	9206600	9207399	595	853	671	616	492	0.381461	0.0159242	up
Chr5	9258200	9258799	633	806	653	585	421	0.32628	0.0352621	up
Chr5	9481800	9482399	442	634	518	478	367	0.439653	0.00598395	up
Chr5	9508000	9508799	660	889	714	677	501	0.392772	0.00885483	up
Chr5	9523800	9524999	933	1272	1012	951	747	0.381233	0.00914116	up
Chr5	9540000	9540399	447	516	453	393	283	0.350063	0.0358918	up
Chr5	9543200	9543799	567	630	612	540	442	0.479102	0.00196991	up
Chr5	959800	960599	634	824	727	635	468	0.445955	0.00265611	up
Chr5	9629200	9630199	943	1217	1003	837	645	0.311669	0.0451402	up
Chr5	9636800	9637199	525	587	555	488	305	0.442462	0.00519391	up
Chr5	9689800	9690199	287	363	326	303	288	0.496056	0.00258494	up
Chr5	9804200	9804799	578	785	770	618	447	0.571834	0.000192388	up
