# Supplementary material for: The Global Changes of N6-methyldeoxyadenosine in Response to Low Temperature in Arabidopsis thaliana and Rice
Source: Plants (Basel). 2023 Jun 19;12(12):2373. doi: 10.3390/plants12122373 (PMC10305114; doi:10.3390/plants12122373)
Supplement: Supplementary file 1 [file plants-12-02373-s001.zip › Table S5.xlsx]

## Sheet: Sheet1
		Table S5. Go analysis of up-DMGs in Arabidopsis after cold treatment.
GO_acc	term_type	Term	queryitem	querytotal	bgitem	bgtotal	pvalue	FDR
GO:0044464	C	cell part	1060	1198	22662	28362	5.9e-15	2.6e-12
GO:0005623	C	cell	1061	1198	22664	28362	3.2e-15	2.6e-12
GO:0005622	C	intracellular	975	1198	20721	28362	2.3e-11	6.9e-09
GO:0044424	C	intracellular part	972	1198	20693	28362	5.7e-11	1.3e-08
GO:0005634	C	nucleus	525	1198	9924	28362	4e-10	7e-08
GO:0030054	C	cell junction	73	1198	901	28362	3.8e-07	4.2e-05
GO:0005911	C	cell-cell junction	73	1198	901	28362	3.8e-07	4.2e-05
GO:0043231	C	intracellular membrane-bounded organelle	852	1198	18205	28362	3.7e-07	4.2e-05
GO:0043227	C	membrane-bounded organelle	852	1198	18217	28362	4.3e-07	4.2e-05
GO:0009506	C	plasmodesma	72	1198	899	28362	6.7e-07	4.6e-05
GO:0043229	C	intracellular organelle	863	1198	18517	28362	5.9e-07	4.6e-05
GO:0043226	C	organelle	863	1198	18527	28362	6.7e-07	4.6e-05
GO:0055044	C	symplast	72	1198	899	28362	6.7e-07	4.6e-05
GO:0000166	F	nucleotide binding	197	1198	3370	28362	3.2e-06	0.0012
GO:1901265	F	nucleoside phosphate binding	197	1198	3370	28362	3.2e-06	0.0012
GO:0036094	F	small molecule binding	201	1198	3434	28362	2.3e-06	0.0012
GO:0005488	F	binding	588	1198	12081	28362	5.5e-06	0.0016
GO:0005524	F	ATP binding	139	1198	2248	28362	8.8e-06	0.002
GO:0044428	C	nuclear part	75	1198	1078	28362	4.1e-05	0.0026
GO:0005886	C	plasma membrane	207	1198	3735	28362	4.4e-05	0.0026
GO:0035639	F	purine ribonucleoside triphosphate binding	151	1198	2515	28362	1.5e-05	0.0029
GO:1901363	F	heterocyclic compound binding	390	1198	7718	28362	3.7e-05	0.0033
GO:0032550	F	purine ribonucleoside binding	153	1198	2612	28362	4.3e-05	0.0033
GO:0001882	F	nucleoside binding	154	1198	2618	28362	3.3e-05	0.0033
GO:0001883	F	purine nucleoside binding	153	1198	2612	28362	4.3e-05	0.0033
GO:0032549	F	ribonucleoside binding	154	1198	2617	28362	3.3e-05	0.0033
GO:0005515	F	protein binding	204	1198	3669	28362	4.2e-05	0.0033
GO:0097159	F	organic cyclic compound binding	391	1198	7737	28362	3.6e-05	0.0033
GO:0030554	F	adenyl nucleotide binding	141	1198	2366	28362	4.2e-05	0.0033
GO:0032559	F	adenyl ribonucleotide binding	141	1198	2364	28362	4e-05	0.0033
GO:0017076	F	purine nucleotide binding	153	1198	2633	28362	6.3e-05	0.0042
GO:0032555	F	purine ribonucleotide binding	153	1198	2631	28362	6.1e-05	0.0042
GO:0097367	F	carbohydrate derivative binding	156	1198	2696	28362	6.5e-05	0.0042
GO:0032553	F	ribonucleotide binding	154	1198	2664	28362	7.6e-05	0.0046
GO:0016772	F	transferase activity, transferring phosphorus-containing groups	103	1198	1657	28362	0.00011	0.0066
GO:0005635	C	nuclear envelope	16	1198	122	28362	0.00015	0.0086
GO:0071944	C	cell periphery	227	1198	4309	28362	0.00033	0.017
GO:0042802	F	identical protein binding	23	1198	236	28362	0.00039	0.021
GO:0008270	F	zinc ion binding	81	1198	1297	28362	0.00054	0.028
GO:0050789	P	regulation of biological process	287	1198	5306	28362	5.9e-06	0.029
GO:0004222	F	metalloendopeptidase activity	9	1198	50	28362	0.00058	0.029
GO:0016070	P	RNA metabolic process	193	1198	3403	28362	2.4e-05	0.031
GO:0043170	P	macromolecule metabolic process	409	1198	8111	28362	2.5e-05	0.031
GO:0090304	P	nucleic acid metabolic process	212	1198	3768	28362	1.4e-05	0.031
GO:0046483	P	heterocycle metabolic process	239	1198	4433	28362	5.6e-05	0.037
GO:2000241	P	regulation of reproductive process	27	1198	266	28362	6.8e-05	0.037
GO:0050793	P	regulation of developmental process	49	1198	627	28362	7.1e-05	0.037
GO:2000026	P	regulation of multicellular organismal development	38	1198	442	28362	7.5e-05	0.037
GO:0006139	P	nucleobase-containing compound metabolic process	228	1198	4178	28362	4.2e-05	0.037
GO:0009628	P	response to abiotic stimulus	123	1198	2022	28362	5.9e-05	0.037
GO:0016020	C	membrane	413	1198	8532	28362	0.00075	0.037
GO:0044437	C	vacuolar part	50	1198	725	28362	0.0009	0.042
GO:0044260	P	cellular macromolecule metabolic process	372	1198	7410	28362	0.00011	0.044
GO:0006725	P	cellular aromatic compound metabolic process	244	1198	4588	28362	0.00011	0.044
GO:0009266	P	response to temperature stimulus	44	1198	559	28362	0.00014	0.046
GO:0007049	P	cell cycle	44	1198	558	28362	0.00014	0.046
GO:0051301	P	cell division	32	1198	358	28362	0.00014	0.046
GO:1901360	P	organic cyclic compound metabolic process	248	1198	4700	28362	0.00015	0.046
GO:0016740	F	transferase activity	199	1198	3791	28362	0.00098	0.047
GO:0003676	F	nucleic acid binding	234	1198	4558	28362	0.001	0.048
