# Supplementary material for: The Global Changes of N6-methyldeoxyadenosine in Response to Low Temperature in Arabidopsis thaliana and Rice
Source: Plants (Basel). 2023 Jun 19;12(12):2373. doi: 10.3390/plants12122373 (PMC10305114; doi:10.3390/plants12122373)
Supplement: Supplementary file 1 [file plants-12-02373-s001.zip › Table S6.xlsx]

## Sheet: Sheet1
		Table S6. Identification of DMPs and DMGs upon cold treatment in rice.
DMRs												DMGs
Chr	strat	end	CK_1	CK_2	Cold_h_1	Cold_h_2	Input	Fold_change	FDR	status		gene	Chr	strat	end
Chr1	10016200	10017799	481	585	228	187	232	-0.845236	0.00643724	down		LOC_Os03g13274	Chr3	7165200	7168599
Chr1	1019200	1020599	322	307	535	354	516	0.982395	0.00198665	up		LOC_Os12g35060	Chr12	21330600	21333999
Chr1	10303400	10304599	283	273	447	345	436	1.00981	0.00163223	up		LOC_Os04g38900	Chr4	23115400	23116999
Chr1	10316000	10316599	131	151	194	145	232	0.770384	0.0304143	up		LOC_Os06g36940	Chr6	21762400	21763999
Chr1	10509400	10510399	194	294	377	279	410	0.944079	0.0100711	up		LOC_Os07g15440	Chr7	8941400	8942999
Chr1	10724000	10724399	121	78	164	119	135	0.983748	0.0462568	up		LOC_Os09g39590	Chr9	22724000	22725399
Chr1	10764600	10765199	170	176	261	175	179	0.823289	0.0286124	up		LOC_Os07g46160	Chr7	27546600	27547999
Chr1	10783400	10783799	194	166	42	33	48	-1.77009	3.94476e-06	down		LOC_Os05g38520	Chr5	22596800	22598599
Chr1	10822200	10822999	186	215	260	202	259	0.712802	0.037117	up		LOC_Os02g46130	Chr2	28115200	28116399
Chr1	10923000	10923999	325	347	426	369	333	0.758566	0.0487314	up		LOC_Os06g51130	Chr6	30923000	30923799
Chr1	10962400	10962999	235	244	109	79	88	-0.852222	0.0272349	down		LOC_Os12g30590	Chr12	18369000	18369999
Chr1	11040600	11041399	188	180	265	184	169	0.776562	0.0287551	up		LOC_Os02g12740	Chr2	6669400	6670599
Chr1	11045200	11045799	144	168	256	178	274	0.97509	0.00133136	up		LOC_Os06g43870	Chr6	26428000	26429199
Chr1	1112000	1113399	316	238	502	361	390	1.11879	0.00433793	up		LOC_Os04g51330	Chr4	30397600	30399999
Chr1	11331400	11331599	80	67	116	80	60	0.900998	0.0362598	up		LOC_Os05g19480	Chr5	11321200	11322399
Chr1	11336000	11336599	190	218	270	207	180	0.732369	0.0272546	up		LOC_Os08g21760	Chr8	13028200	13029599
Chr1	11337600	11338399	157	157	232	176	250	0.877608	0.0168882	up		LOC_Os02g21880	Chr2	13008000	13008999
Chr1	11430200	11431799	392	402	505	394	507	0.682503	0.0283127	up		LOC_Os04g53496	Chr4	31859400	31861599
Chr1	11513400	11514599	305	343	393	307	327	0.619241	0.0448378	up		LOC_Os01g59160	Chr1	34177400	34178199
Chr1	11523200	11524799	287	367	441	359	521	0.809396	0.0185873	up		LOC_Os03g43720	Chr3	24453200	24453999
Chr1	11558000	11558599	132	150	292	206	232	1.31926	2.69555e-05	up		LOC_Os04g45800	Chr4	27114800	27115599
Chr1	11579200	11580599	410	554	161	91	129	-1.44728	0.000105919	down		LOC_Os08g24840	Chr8	15026200	15027399
Chr1	11604600	11605199	283	290	140	98	95	-0.773914	0.0279211	down		LOC_Os01g67410	Chr1	39145800	39146599
Chr1	11715400	11716199	184	195	281	220	273	0.907995	0.00551456	up		LOC_Os06g47830	Chr6	28948800	28949399
Chr1	11716800	11717999	344	451	642	429	487	0.930035	0.00129467	up		LOC_Os05g08090	Chr5	4405400	4408599
Chr1	11818600	11819599	213	230	301	278	267	0.908931	0.0140943	up		LOC_Os03g54040	Chr3	30982800	30983599
Chr1	11824800	11825399	145	173	207	157	157	0.702372	0.0338274	up		LOC_Os08g33140	Chr8	20593600	20594199
Chr1	11995600	11996799	320	363	460	327	468	0.703782	0.0154347	up		LOC_Os03g18180	Chr3	10187800	10188799
Chr1	12129800	12131199	405	505	603	465	528	0.743211	0.0370041	up		LOC_Os02g56880	Chr2	34866400	34867999
Chr1	12248000	12248399	91	98	167	114	158	1.06654	0.0035943	up		LOC_Os01g73800	Chr1	42752600	42754199
Chr1	12474000	12474399	119	67	170	123	103	1.12438	0.0362223	up		LOC_Os10g41534	Chr10	22318000	22318999
Chr1	12739800	12740199	120	103	174	114	143	0.849382	0.0406951	up		LOC_Os09g23380	Chr9	13894400	13895599
Chr1	1289400	1290199	156	214	282	205	252	0.90669	0.0112246	up		LOC_Os09g08390	Chr9	4351800	4352599
Chr1	12989400	12990199	208	221	262	227	296	0.703679	0.0397864	up		LOC_Os01g66420	Chr1	38567200	38567999
Chr1	1310000	1311199	223	300	361	271	294	0.785738	0.015167	up		LOC_Os03g25050	Chr3	14299600	14300999
Chr1	13146000	13146999	265	230	380	268	315	0.873723	0.0189746	up		LOC_Os03g25464	Chr3	14550600	14551599
Chr1	13157200	13157799	122	125	179	154	183	0.943277	0.00695773	up		LOC_Os10g22520	Chr10	11673800	11674599
Chr1	13161600	13162199	120	122	225	159	193	1.16023	0.00159721	up		LOC_Os12g39070	Chr12	24032600	24033999
Chr1	13193400	13196399	1065	1299	369	228	321	-1.49574	2.58338e-08	down		LOC_Os10g36760	Chr10	19680200	19681199
Chr1	13203800	13204199	251	187	98	68	82	-0.923095	0.0446318	down		LOC_Os09g12710	Chr9	7274400	7274999
Chr1	13272600	13273199	120	120	187	142	147	0.955444	0.0045329	up		LOC_Os09g25580	Chr9	15353400	15354199
Chr1	1328200	1329399	211	255	402	333	432	1.17455	1.50248e-05	up		LOC_Os04g33590	Chr4	20342600	20343199
Chr1	13323000	13323999	221	227	295	225	296	0.716431	0.0257354	up		LOC_Os03g51670	Chr3	29591400	29592199
Chr1	13336200	13337199	503	374	180	142	136	-0.958728	0.0264531	down		LOC_Os06g29120	Chr6	16613400	16614199
Chr1	13394800	13395199	108	105	142	124	119	0.831718	0.0371458	up		LOC_Os01g72250	Chr1	41893400	41894799
Chr1	13396200	13397199	281	283	401	319	419	0.856732	0.0279565	up		LOC_Os01g47256	Chr1	27005000	27005999
Chr1	13532000	13532599	142	192	236	182	227	0.83837	0.0143495	up		LOC_Os02g17130	Chr2	9810200	9811799
Chr1	13574400	13575799	419	533	235	158	199	-0.775876	0.0107457	down		LOC_Os04g06850	Chr4	3614000	3614599
Chr1	13661200	13661399	56	51	82	77	48	1.08605	0.0175636	up		LOC_Os03g27210	Chr3	15587000	15587999
Chr1	1371600	1372999	237	310	526	373	475	1.22255	1.37688e-05	up		LOC_Os03g12250	Chr3	6438200	6438799
Chr1	13736600	13737199	327	333	167	109	105	-0.770974	0.0412178	down		LOC_Os12g31400	Chr12	18891600	18892799
Chr1	1375400	1376399	171	277	298	248	350	0.817177	0.0336018	up		LOC_Os03g08860	Chr3	4593000	4593799
Chr1	13821400	13821999	198	184	247	214	215	0.779991	0.0384411	up		LOC_Os05g36160	Chr5	21435200	21436199
Chr1	1389000	1390599	220	251	424	311	352	1.14467	5.41375e-06	up		LOC_Os08g04420	Chr8	2163000	2164399
Chr1	14047800	14048599	214	219	263	250	283	0.766978	0.037933	up		LOC_Os10g09740	Chr10	5270800	5271199
Chr1	14220400	14220999	179	167	226	178	150	0.723607	0.0480867	up		LOC_Os06g29994	Chr6	17256400	17257199
Chr1	14251800	14252399	127	116	208	149	177	1.04603	0.00338107	up		LOC_Os04g05070	Chr4	2502800	2503199
Chr1	14619000	14620799	543	514	680	509	666	0.664603	0.0493793	up		LOC_Os08g02904	Chr8	1241600	1242999
Chr1	14635000	14635399	85	105	147	119	104	0.999524	0.00517479	up		LOC_Os03g57290	Chr3	32675400	32675999
Chr1	14787800	14788399	142	175	206	172	192	0.771291	0.0222804	up		LOC_Os07g08330	Chr7	4264600	4265199
Chr1	14879600	14880199	162	163	222	197	218	0.881134	0.0121084	up		LOC_Os01g67420	Chr1	39161400	39162199
Chr1	14900800	14901199	107	101	140	141	165	0.957316	0.0236152	up		LOC_Os01g54170	Chr1	31158400	31159799
Chr1	14915000	14915799	252	279	334	258	262	0.662935	0.0408596	up		LOC_Os05g06730	Chr5	3512000	3512599
Chr1	14997600	14998199	133	119	221	158	190	1.0783	0.00393514	up		LOC_Os09g03800	Chr9	1925000	1925599
Chr1	15193000	15193799	190	193	249	204	274	0.74967	0.0251571	up		LOC_Os03g33074	Chr3	18924400	18925399
Chr1	15208400	15209199	248	289	88	50	96	-1.47358	2.96793e-06	down		LOC_Os10g04342	Chr10	2045800	2046399
Chr1	15385000	15385799	163	219	255	186	236	0.716626	0.0311692	up		LOC_Os01g28989	Chr1	16234200	16234599
Chr1	1542200	1542799	160	140	205	156	194	0.76117	0.0457709	up		LOC_Os08g04680	Chr8	2337200	2338199
Chr1	15428600	15428799	49	57	101	64	85	1.13083	0.00806426	up		LOC_Os01g53700	Chr1	30855000	30855799
Chr1	15458800	15459799	319	273	443	293	331	0.791625	0.0437415	up		LOC_Os10g25130	Chr10	12966600	12967799
Chr1	15767400	15768599	374	396	478	376	405	0.655097	0.0425904	up		LOC_Os08g20480	Chr8	12288800	12290199
Chr1	15781600	15781999	95	91	148	127	173	1.07355	0.0048067	up		LOC_Os05g02060	Chr5	601000	602399
Chr1	15890600	15892399	374	458	559	430	528	0.760332	0.0236465	up		LOC_Os09g11380	Chr9	6330000	6331399
Chr1	15916000	15916799	165	176	260	191	237	0.903257	0.00406315	up		LOC_Os02g49730	Chr2	30402000	30404199
Chr1	15939400	15939999	179	189	240	197	144	0.757316	0.0235854	up		LOC_Os03g01020	Chr3	25000	26199
Chr1	16234200	16234599	193	204	97	66	80	-0.790507	0.0374268	down		LOC_Os09g39250	Chr9	22550000	22550799
Chr1	16272000	16272799	325	405	159	98	268	-1.01285	0.000985678	down		LOC_Os02g15510	Chr2	8693600	8694999
Chr1	16431800	16432599	271	300	390	262	272	0.684133	0.0371125	up		LOC_Os01g10504	Chr1	5563800	5564599
Chr1	16442800	16444399	418	445	567	421	524	0.695401	0.0229773	up		LOC_Os04g45710	Chr4	27035200	27036799
Chr1	16480400	16481199	232	198	304	258	359	0.889106	0.0180467	up		LOC_Os03g15180	Chr3	8302400	8303199
Chr1	16562800	16563599	200	141	298	196	280	1.00298	0.0244177	up		LOC_Os03g42040	Chr3	23356000	23358199
Chr1	16607800	16608399	178	159	246	180	166	0.829435	0.0209032	up		LOC_Os09g13820	Chr9	8118000	8118599
Chr1	16635200	16635799	158	157	226	162	224	0.795393	0.0194603	up		LOC_Os01g56670	Chr1	32701800	32702599
Chr1	16673600	16677199	931	1039	1182	1058	1345	0.707884	0.048839	up		LOC_Os05g43830	Chr5	25477600	25478799
Chr1	16677600	16678799	230	268	362	298	357	0.920895	0.0012885	up		LOC_Os05g27660	Chr5	16110000	16110799
Chr1	16693200	16694199	237	254	339	244	370	0.745592	0.0269588	up		LOC_Os12g35350	Chr12	21489000	21489399
Chr1	16772600	16772999	106	92	250	197	116	1.6733	2.1325e-08	up		LOC_Os04g35240	Chr4	21413400	21414599
Chr1	16849200	16849799	176	177	222	183	221	0.705813	0.0486214	up		LOC_Os05g32380	Chr5	18885200	18885799
Chr1	16883000	16884399	292	273	530	397	277	1.20934	1.1661e-05	up		LOC_Os04g10240	Chr4	5527200	5527599
Chr1	16911000	16913999	1968	2114	2943	2194	2634	0.832498	0.000701323	up		LOC_Os08g41960	Chr8	26527200	26527799
Chr1	16945200	16946199	343	363	470	321	382	0.655956	0.036588	up		LOC_Os02g58120	Chr2	35568000	35569199
Chr1	16947000	16947599	409	387	640	505	500	1.02503	0.000409214	up		LOC_Os05g47830	Chr5	27418600	27419199
Chr1	1694800	1696399	277	342	460	351	537	0.900064	0.00300283	up		LOC_Os02g29110	Chr2	17236400	17237399
Chr1	17030800	17031399	179	220	102	64	92	-0.77031	0.0454572	down		LOC_Os02g32200	Chr2	19020400	19020999
Chr1	17099000	17099599	132	134	201	163	193	0.959245	0.00803738	up		LOC_Os08g09180	Chr8	5321000	5321999
Chr1	17217800	17218199	65	75	146	104	141	1.33749	3.86878e-05	up		LOC_Os05g34570	Chr5	20502200	20502999
Chr1	17260200	17260799	158	128	207	173	213	0.908938	0.0495389	up		LOC_Os01g05070	Chr1	2380600	2381399
Chr1	17444800	17445399	149	170	204	169	234	0.739199	0.0401537	up		LOC_Os05g11630	Chr5	6594200	6594599
Chr1	17445800	17446599	160	186	248	188	260	0.839975	0.00625506	up		LOC_Os12g41140	Chr12	25493800	25494799
Chr1	17493800	17494199	140	137	209	135	136	0.797423	0.0305226	up		LOC_Os07g12910	Chr7	7415400	7416399
Chr1	17567400	17568599	302	345	415	307	345	0.66169	0.0248685	up		LOC_Os12g32260	Chr12	19482600	19483199
Chr1	1760400	1760999	117	171	207	151	186	0.826672	0.0193925	up		LOC_Os01g65410	Chr1	37964000	37964999
Chr1	17614200	17614999	203	206	293	237	301	0.880374	0.0181113	up		LOC_Os10g12450	Chr10	6927200	6928199
Chr1	17849600	17850199	263	252	109	90	86	-0.868336	0.0231632	down		LOC_Os09g17850	Chr9	10922800	10923399
Chr1	18029800	18030399	151	150	217	176	206	0.890487	0.00764748	up		LOC_Os05g28980	Chr5	16991000	16992399
Chr1	18070600	18070999	126	97	163	135	138	0.914488	0.0445926	up		LOC_Os12g06850	Chr12	3328800	3329999
Chr1	18110200	18111199	243	253	321	246	285	0.695415	0.0380144	up		LOC_Os01g44130	Chr1	25294600	25296199
Chr1	1817000	1818999	366	434	596	437	633	0.873173	0.000982879	up		LOC_Os08g20480	Chr8	12287400	12288399
Chr1	18298000	18298399	175	186	73	55	68	-0.994641	0.0075722	down		LOC_Os04g32480	Chr4	19491400	19491999
Chr1	1832600	1833399	184	216	241	220	299	0.72932	0.0459155	up		LOC_Os07g02090	Chr7	660400	661199
Chr1	18341000	18341799	195	178	260	199	232	0.79549	0.0344667	up		LOC_Os01g53450	Chr1	30711000	30711999
Chr1	18348600	18350399	473	510	608	442	501	0.593916	0.0431464	up		LOC_Os03g44910	Chr3	25354400	25354999
Chr1	18543800	18545599	531	520	689	500	479	0.671524	0.0307217	up		LOC_Os10g34880	Chr10	18606400	18608399
Chr1	18589600	18590399	166	202	237	214	268	0.818286	0.0177116	up		LOC_Os09g12240	Chr9	6959000	6959599
Chr1	18594800	18595599	203	217	333	230	282	0.916147	0.0212907	up		LOC_Os02g15430	Chr2	8645000	8645599
Chr1	18659800	18661199	396	499	144	93	174	-1.41972	2.63181e-06	down		LOC_Os07g37760	Chr7	22649600	22650399
Chr1	18875600	18875999	172	107	37	29	43	-1.60208	0.00220208	down		LOC_Os03g59580	Chr3	33921000	33921599
Chr1	18934200	18937399	821	950	1106	883	1053	0.679618	0.0316044	up		LOC_Os08g29790	Chr8	18314400	18314999
Chr1	19053800	19054199	112	87	178	143	130	1.1845	0.00245165	up		LOC_Os11g36719	Chr11	21675600	21676799
Chr1	19057400	19057999	156	167	224	148	150	0.694631	0.0474482	up		LOC_Os10g37600	Chr10	20116000	20116599
Chr1	191000	191599	148	180	235	167	208	0.796192	0.0136991	up		LOC_Os11g29240	Chr11	16954200	16955199
Chr1	19155600	19156399	222	275	352	268	217	0.829208	0.01776	up		LOC_Os07g41720	Chr7	25001400	25002199
Chr1	19284600	19285399	248	221	356	272	316	0.915731	0.0106272	up		LOC_Os09g29950	Chr9	18230800	18231199
Chr1	19292600	19293399	185	209	258	251	254	0.898823	0.011699	up		LOC_Os02g52220	Chr2	31974000	31975599
Chr1	19414600	19415399	186	199	270	205	243	0.805918	0.03358	up		LOC_Os02g47820	Chr2	29253400	29254199
Chr1	19437000	19437399	82	88	140	99	120	0.988893	0.0107241	up		LOC_Os09g23550	Chr9	13994000	13994599
Chr1	19507600	19508399	197	212	311	213	280	0.850614	0.0243199	up		LOC_Os04g02820	Chr4	1095200	1095799
Chr1	19713800	19714599	252	223	350	268	208	0.873978	0.0211968	up		LOC_Os08g33090	Chr8	20567000	20567599
Chr1	19776800	19777199	100	89	163	127	127	1.1153	0.006507	up		LOC_Os01g33230	Chr1	18298000	18298399
Chr1	19909200	19909799	142	133	202	159	188	0.893069	0.0118615	up		LOC_Os03g30780	Chr3	17549400	17550799
Chr1	20040000	20040599	157	148	200	163	223	0.754835	0.0478228	up		LOC_Os04g32260	Chr4	19328200	19328799
Chr1	2009600	2010399	148	115	271	232	155	1.43554	0.000319881	up		LOC_Os02g26470	Chr2	15544800	15545599
Chr1	20113600	20113999	84	78	117	121	123	1.07967	0.0108542	up		LOC_Os06g22400	Chr6	13022000	13022399
Chr1	20115600	20117199	352	356	463	399	505	0.796648	0.0181282	up		LOC_Os04g52479	Chr4	31204000	31204399
Chr1	20124200	20124799	141	164	218	172	173	0.864836	0.0155038	up		LOC_Os06g33910	Chr6	19725000	19725399
Chr1	2014600	2015799	238	288	341	282	317	0.761377	0.0340442	up		LOC_Os03g49464	Chr3	28155800	28157199
Chr1	20153400	20153999	160	181	215	196	204	0.792013	0.037954	up		LOC_Os04g35780	Chr4	21801600	21803199
Chr1	20225800	20226999	227	286	325	262	324	0.710487	0.0241024	up		LOC_Os12g42570	Chr12	26437800	26438599
Chr1	20277600	20278399	167	206	239	186	244	0.699877	0.0492441	up		LOC_Os11g37780	Chr11	22367800	22368599
Chr1	20373400	20373999	166	163	273	169	232	0.90508	0.0299226	up		LOC_Os01g44000	Chr1	25215400	25215999
Chr1	20528800	20529399	97	106	189	145	181	1.2234	5.09991e-05	up		LOC_Os07g18158	Chr7	10762000	10762599
Chr1	20863800	20865599	632	697	331	235	261	-0.733847	0.0218867	down		LOC_Os01g57490	Chr1	33221000	33221399
Chr1	20915200	20915799	300	231	99	76	63	-1.11499	0.00903195	down		LOC_Os12g42280	Chr12	26267400	26268199
Chr1	21363800	21364599	220	275	315	228	271	0.639135	0.0426012	up		LOC_Os10g34020	Chr10	18147200	18147999
Chr1	2137600	2138199	136	150	214	160	179	0.889971	0.011232	up		LOC_Os11g05420	Chr11	2438800	2439999
Chr1	21542600	21544199	435	392	549	474	636	0.81398	0.0325146	up		LOC_Os12g34870	Chr12	21229400	21230199
Chr1	21726200	21727399	471	443	123	112	114	-1.44859	9.75014e-06	down		LOC_Os11g36560	Chr11	21572200	21572999
Chr1	21805200	21805799	163	154	224	196	206	0.916526	0.0126553	up		LOC_Os02g29980	Chr2	17816800	17818199
Chr1	21916600	21916999	87	89	133	108	137	0.960534	0.0171711	up		LOC_Os12g43700	Chr12	27147800	27148199
Chr1	21946200	21946999	262	293	141	94	138	-0.745364	0.0256755	down		LOC_Os11g17810	Chr11	9963600	9964199
Chr1	22011200	22012199	364	374	172	129	168	-0.794691	0.0186022	down		LOC_Os10g28510	Chr10	14832400	14833799
Chr1	22141200	22141999	188	190	262	192	216	0.761508	0.0193947	up		LOC_Os08g10150	Chr8	5886600	5887399
Chr1	22279000	22279599	161	130	237	160	198	0.926996	0.0210628	up		LOC_Os07g45460	Chr7	27117800	27118999
Chr1	2233000	2233999	186	208	308	230	284	0.952796	0.00598829	up		LOC_Os10g36170	Chr10	19335600	19336999
Chr1	22370000	22370799	172	143	300	225	277	1.22701	0.000569106	up		LOC_Os08g35710	Chr8	22532800	22533999
Chr1	22416600	22417999	395	406	489	398	426	0.65479	0.0497455	up		LOC_Os04g48210	Chr4	28718000	28718799
Chr1	22627600	22628199	142	131	199	157	198	0.882924	0.0182569	up		LOC_Os04g47000	Chr4	27861000	27861599
Chr1	22709400	22710199	159	202	233	186	203	0.729837	0.0266366	up		LOC_Os04g49360	Chr4	29460000	29461199
Chr1	22812000	22812999	325	341	155	121	107	-0.767218	0.0362502	down		LOC_Os01g33930	Chr1	18659800	18661199
Chr1	23021600	23022399	275	310	83	54	73	-1.60196	7.04189e-05	down		LOC_Os03g29570	Chr3	16859200	16860599
Chr1	23027800	23028199	115	141	165	132	112	0.727326	0.0444654	up		LOC_Os03g37490	Chr3	20800400	20800999
Chr1	23117400	23118199	195	182	315	193	275	0.905935	0.0188109	up		LOC_Os02g58480	Chr2	35756600	35757399
Chr1	23266000	23267599	411	393	502	413	502	0.691693	0.0434713	up		LOC_Os03g40725	Chr3	22659000	22660199
Chr1	23355600	23356399	243	295	57	36	66	-2.03573	7.54604e-10	down		LOC_Os01g38680	Chr1	21726200	21727399
Chr1	23397400	23398599	216	316	442	322	397	1.03634	0.00485164	up		LOC_Os03g44340	Chr3	24932800	24933199
Chr1	23402200	23402999	193	173	279	196	232	0.863256	0.0208118	up		LOC_Os05g50950	Chr5	29235400	29236599
Chr1	23470400	23471199	204	200	334	232	294	0.976784	0.00291933	up		LOC_Os02g17060	Chr2	9760400	9761399
Chr1	23581200	23581999	207	247	294	243	331	0.758214	0.0241283	up		LOC_Os05g49530	Chr5	28399800	28400399
Chr1	2361600	2363599	526	514	704	551	712	0.772199	0.0235626	up		LOC_Os10g31250	Chr10	16390200	16390999
Chr1	23668200	23668599	100	96	138	120	163	0.906785	0.018223	up		LOC_Os06g18960	Chr6	10785000	10785399
Chr1	236800	237599	230	183	305	227	234	0.851655	0.0367557	up		LOC_Os12g36940	Chr12	22650800	22651399
Chr1	23688400	23689399	223	222	372	275	412	1.03668	0.0030273	up		LOC_Os01g45130	Chr1	25605800	25606199
Chr1	23700000	23701199	272	240	372	258	369	0.783515	0.0383285	up		LOC_Os01g65360	Chr1	37927600	37928799
Chr1	2380600	2381399	249	325	124	98	148	-0.855108	0.0245899	down		LOC_Os07g38860	Chr7	23315000	23315999
Chr1	23881800	23882199	121	110	169	116	152	0.790521	0.0432186	up		LOC_Os11g19250	Chr11	11012000	11012599
Chr1	24166400	24166799	118	82	164	112	93	0.938624	0.0453725	up		LOC_Os07g07300	Chr7	3626600	3627199
Chr1	2419400	2420599	322	342	418	337	405	0.693541	0.0246487	up		LOC_Os08g09680	Chr8	5593800	5594399
Chr1	24229600	24230599	263	245	368	300	340	0.898123	0.0102089	up		LOC_Os01g46090	Chr1	26203600	26204999
Chr1	24243600	24244599	236	245	349	249	302	0.809762	0.00839137	up		LOC_Os01g19080	Chr1	10783400	10783799
Chr1	24337600	24338399	200	233	276	224	210	0.720655	0.0390786	up		LOC_Os03g08900	Chr3	4609800	4610399
Chr1	24375800	24376199	96	101	141	107	112	0.834526	0.0310481	up		LOC_Os12g08140	Chr12	4166000	4166999
Chr1	24426000	24427199	302	324	454	341	449	0.846635	0.0107703	up		LOC_Os06g37820	Chr6	22383200	22385199
Chr1	2446000	2446599	139	183	240	199	147	0.967438	0.00348541	up		LOC_Os05g36920	Chr5	21566400	21566799
Chr1	2463800	2464199	91	128	150	117	72	0.802355	0.0366293	up		LOC_Os04g34220	Chr4	20730600	20730999
Chr1	24649000	24649599	136	142	221	170	213	0.995248	0.00439028	up		LOC_Os01g41270	Chr1	23355600	23356399
Chr1	24673400	24674599	285	247	358	315	350	0.8463	0.0385727	up		LOC_Os11g42030	Chr11	25276000	25278399
Chr1	2479600	2480199	116	162	209	154	208	0.897085	0.0256469	up		LOC_Os11g12010	Chr11	6686400	6688799
Chr1	2487400	2489199	404	526	669	429	505	0.735198	0.0305672	up		LOC_Os11g42080	Chr11	25333400	25335599
Chr1	24965000	24965999	317	370	151	87	142	-1.0447	0.00141832	down		LOC_Os02g40210	Chr2	24331200	24332799
Chr1	25061600	25063199	294	398	505	375	488	0.858824	0.00311864	up		LOC_Os02g40400	Chr2	24464600	24465999
Chr1	25215400	25215999	300	232	102	78	90	-1.07724	0.0161858	down		LOC_Os11g42090	Chr11	25344200	25345399
Chr1	25263000	25264799	443	488	558	471	680	0.659318	0.0406983	up		LOC_Os11g42760	Chr11	25751000	25751999
Chr1	25278000	25279799	536	468	716	547	634	0.823668	0.0322191	up		LOC_Os11g42770	Chr11	25759000	25759799
Chr1	25294600	25296199	472	516	227	154	207	-0.881197	0.00435982	down		LOC_Os11g42740	Chr11	25741400	25742199
Chr1	25385600	25387399	508	455	754	542	623	0.915969	0.0169063	up		LOC_Os02g40320	Chr2	24405200	24405999
Chr1	25431800	25432999	341	468	128	87	99	-1.40608	2.83372e-05	down		LOC_Os02g40280	Chr2	24393600	24394199
Chr1	25470600	25471199	134	138	211	186	188	1.06097	0.00504993	up		LOC_Os02g40120	Chr2	24289000	24289999
Chr1	25605800	25606199	207	157	51	36	47	-1.58477	0.000137248	down		LOC_Os02g40260	Chr2	24372800	24373799
Chr1	25690000	25690599	203	188	295	220	264	0.891442	0.0270758	up		LOC_Os11g46900	Chr11	28179000	28179799
Chr1	25696000	25697199	241	272	404	312	444	0.988091	0.000802564	up		LOC_Os11g46850	Chr11	28116000	28116799
Chr1	25768400	25768799	71	101	150	116	177	1.14623	0.0131402	up		LOC_Os11g46200	Chr11	27983000	27983799
Chr1	258400	259799	367	373	494	352	474	0.68709	0.0287632	up		LOC_Os11g46220	Chr11	27990400	27991599
Chr1	26154400	26155399	214	257	322	232	321	0.737504	0.0142255	up		LOC_Os11g46080	Chr11	27894200	27895799
Chr1	26203600	26204999	435	582	137	82	138	-1.72117	3.05697e-08	down		LOC_Os11g46820	Chr11	28101200	28101999
Chr1	26224800	26225599	285	334	117	93	107	-1.04967	0.000610196	down		LOC_Os04g12620	Chr4	6994200	6995399
Chr1	26286400	26287399	179	198	298	231	357	0.995148	0.00160279	up		LOC_Os11g46150	Chr11	27946600	27947599
Chr1	26412800	26413599	200	226	319	218	330	0.829657	0.0108921	up		LOC_Os11g45510	Chr11	27554200	27555599
Chr1	26581200	26581599	138	109	208	146	173	1.00127	0.0137771	up		LOC_Os04g12589	Chr4	6972800	6973799
Chr1	2686400	2686799	106	107	181	140	116	1.09418	0.00141086	up		LOC_Os11g46120	Chr11	27913600	27914599
Chr1	2694600	2695399	201	226	284	195	185	0.661913	0.0393142	up		LOC_Os11g47100	Chr11	28292800	28293399
Chr1	27005000	27005999	273	330	150	102	164	-0.759381	0.0292253	down		LOC_Os11g46130	Chr11	27920000	27920599
Chr1	270400	271199	212	281	336	265	364	0.802629	0.0226688	up		LOC_Os11g46110	Chr11	27909600	27910399
Chr1	27042600	27044199	488	584	272	205	330	-0.660875	0.0301447	down		LOC_Os04g12580	Chr4	6967800	6968999
Chr1	27112800	27113799	336	293	497	358	407	0.929926	0.00941549	up		LOC_Os11g45890	Chr11	27760200	27761399
Chr1	27185600	27185999	72	76	108	98	159	0.994345	0.0139988	up		LOC_Os11g47060	Chr11	28274400	28274999
Chr1	27205600	27207799	637	829	307	236	303	-0.918919	0.00491385	down		LOC_Os11g42100	Chr11	25358400	25359399
Chr1	2725800	2726399	175	179	228	184	199	0.725316	0.0432928	up		LOC_Os11g12420	Chr11	6940000	6941999
Chr1	27574000	27575199	368	436	133	80	111	-1.42662	2.85101e-07	down		LOC_Os11g47240	Chr11	28410800	28411199
Chr1	27666200	27666599	108	91	169	125	159	1.05353	0.0100241	up		LOC_Os04g12600	Chr4	6977400	6978199
Chr1	27753200	27754399	371	409	191	139	207	-0.740795	0.0181766	down		LOC_Os11g47030	Chr11	28258600	28259199
Chr1	27895800	27897799	562	685	800	659	717	0.744518	0.0181694	up		LOC_Os11g45820	Chr11	27724400	27724999
Chr1	27920400	27921399	212	291	380	246	370	0.815025	0.0153775	up		LOC_Os11g47150	Chr11	28365800	28366199
Chr1	28003000	28003799	295	342	147	100	116	-0.86919	0.00598664	down		LOC_Os11g45920	Chr11	27784800	27785399
Chr1	28198000	28198399	100	77	147	115	116	1.05787	0.0121265	up		LOC_Os04g30000	Chr4	17903600	17904599
Chr1	28208200	28208999	290	225	431	303	273	0.989674	0.0210463	up		LOC_Os11g45410	Chr11	27497000	27498199
Chr1	28272200	28273199	294	266	376	302	348	0.775891	0.0362785	up		LOC_Os04g12570	Chr4	6960000	6961199
Chr1	28276200	28276799	117	126	222	166	221	1.177	0.00196412	up		LOC_Os04g29790	Chr4	17755800	17756799
Chr1	28388000	28388599	208	227	62	45	53	-1.52352	4.04335e-06	down		LOC_Os11g46950	Chr11	28220400	28220999
Chr1	28423800	28424199	212	185	75	71	59	-0.933946	0.026596	down		LOC_Os11g45540	Chr11	27573200	27574199
Chr1	28602000	28602399	73	72	110	85	138	0.929162	0.0165746	up		LOC_Os11g45380	Chr11	27451200	27452799
Chr1	28669600	28669999	104	91	145	110	129	0.881826	0.0269907	up		LOC_Os11g46890	Chr11	28172000	28172999
Chr1	28746200	28746599	103	77	182	122	129	1.23243	0.0028046	up		LOC_Os04g26440	Chr4	15425800	15426199
Chr1	28783000	28783399	125	145	201	151	137	0.888125	0.00803738	up		LOC_Os11g46000	Chr11	27843200	27844399
Chr1	288200	290199	427	462	595	436	619	0.713532	0.0177522	up		LOC_Os04g29770	Chr4	17739400	17740399
Chr1	28823600	28824199	143	155	214	172	240	0.882001	0.0116654	up		LOC_Os11g45790	Chr11	27706400	27707199
Chr1	28851400	28852399	217	201	281	218	304	0.753699	0.0304176	up		LOC_Os11g45750	Chr11	27684000	27684799
Chr1	29022600	29022999	105	97	132	122	134	0.844533	0.0437415	up		LOC_Os11g47670	Chr11	28781400	28782199
Chr1	29631000	29633199	641	698	262	199	304	-1.03511	0.000378695	down		LOC_Os11g47447	Chr11	28652600	28653399
Chr1	29717600	29718399	170	190	236	172	250	0.68184	0.0359765	up		LOC_Os11g47180	Chr11	28376200	28377599
Chr1	29900000	29901399	371	327	483	391	596	0.823799	0.0253784	up		LOC_Os11g46880	Chr11	28159800	28160599
Chr1	30025600	30026799	359	411	581	414	568	0.869617	0.00452373	up		LOC_Os04g30160	Chr4	18004400	18004999
Chr1	30051400	30052399	320	406	139	110	92	-1.02972	0.00172183	down		LOC_Os04g30070	Chr4	17946600	17947199
Chr1	30305200	30305999	179	193	281	202	255	0.874891	0.0102979	up		LOC_Os11g45140	Chr11	27325400	27326599
Chr1	30340200	30340999	199	236	271	222	263	0.695087	0.033204	up		LOC_Os03g37460	Chr3	20770000	20770599
Chr1	30454200	30455399	313	342	462	345	496	0.803294	0.00582791	up		LOC_Os11g47600	Chr11	28759200	28759999
Chr1	30467800	30468399	118	138	167	125	182	0.695257	0.0474965	up		LOC_Os04g30020	Chr4	17912400	17912999
Chr1	30537000	30537799	246	239	362	254	279	0.835274	0.0229667	up		LOC_Os11g47390	Chr11	28509000	28510799
Chr1	3054200	3054999	175	171	323	233	232	1.17853	5.23137e-05	up		LOC_Os04g29860	Chr4	17799800	17800399
Chr1	30598000	30598599	151	152	222	157	224	0.816718	0.024915	up		LOC_Os11g47480	Chr11	28713200	28713599
Chr1	30601000	30601999	237	225	350	277	347	0.941815	0.00356128	up		LOC_Os04g30050	Chr4	17943800	17944599
Chr1	30711000	30711999	297	383	148	109	109	-0.894848	0.00581722	down		LOC_Os02g40100	Chr2	24278400	24278999
Chr1	3079600	3080999	224	346	380	307	321	0.796358	0.027515	up		LOC_Os04g26510	Chr4	15460000	15461199
Chr1	30855000	30855799	267	305	136	97	172	-0.795165	0.017655	down		LOC_Os02g40240	Chr2	24350000	24351399
Chr1	3094000	3095999	440	586	643	475	567	0.634944	0.0348543	up		LOC_Os04g26450	Chr4	15428400	15429399
Chr1	30985200	30986199	214	215	300	243	320	0.846087	0.0223215	up		LOC_Os11g47740	Chr11	28800600	28801799
Chr1	30992200	30992799	159	181	232	172	198	0.752348	0.0400341	up		LOC_Os11g45150	Chr11	27329200	27329999
Chr1	31115400	31115999	169	119	238	172	231	0.987315	0.0393256	up		LOC_Os03g29065	Chr3	16512400	16513599
Chr1	31122400	31122799	81	79	174	107	123	1.29449	0.000178659	up		LOC_Os11g12610	Chr11	7084600	7084999
Chr1	31158400	31159799	443	533	219	178	214	-0.783672	0.00836944	down		LOC_Os11g45750	Chr11	27689200	27690199
Chr1	3145800	3146799	214	286	408	302	255	1.01688	0.000869282	up		LOC_Os11g45110	Chr11	27298200	27298999
Chr1	3148000	3148999	162	263	332	222	274	0.892838	0.0216764	up		LOC_Os04g30170	Chr4	18010800	18011999
Chr1	31563600	31564199	127	113	204	162	171	1.10822	0.00120367	up		LOC_Os04g30180	Chr4	18010800	18011999
Chr1	31588400	31588999	156	143	234	149	166	0.836779	0.0340705	up		LOC_Os11g45100	Chr11	27289200	27290199
Chr1	31633800	31635399	503	418	651	502	542	0.815158	0.0348352	up		LOC_Os03g28990	Chr3	16457600	16459199
Chr1	31646400	31647599	217	230	383	303	360	1.12447	0.000211039	up		LOC_Os04g25840	Chr4	15026000	15027199
Chr1	3168200	3169999	332	403	542	402	421	0.867829	0.0116323	up		LOC_Os04g26440	Chr4	15424800	15425399
Chr1	3176400	3177399	173	228	280	215	273	0.817232	0.0124546	up		LOC_Os02g40510	Chr2	24568200	24569999
Chr1	3185800	3186399	116	130	272	184	190	1.38465	2.24044e-05	up		LOC_Os11g45060	Chr11	27272800	27273599
Chr1	3191200	3191799	110	134	177	148	189	0.93033	0.00685489	up		LOC_Os11g42580	Chr11	25626600	25627799
Chr1	319600	320599	205	255	286	218	306	0.641863	0.0473733	up		LOC_Os03g20540	Chr3	11641800	11642199
Chr1	32004600	32005399	251	326	105	76	95	-1.16471	0.000103065	down		LOC_Os03g29045	Chr3	16503400	16504999
Chr1	32081800	32084399	690	764	1024	810	858	0.843801	0.0111641	up		LOC_Os11g45090	Chr11	27284600	27285399
Chr1	3228800	3230199	247	283	369	272	353	0.777597	0.0139307	up		LOC_Os11g45750	Chr11	27691200	27691799
Chr1	3243600	3244399	198	239	302	205	250	0.712355	0.0443202	up		LOC_Os11g45930	Chr11	27793800	27794599
Chr1	32470200	32471399	308	285	418	295	390	0.754328	0.0267622	up		LOC_Os11g47500	Chr11	28723000	28724399
Chr1	3258000	3258599	136	140	218	163	211	0.964954	0.0107002	up		LOC_Os04g26100	Chr4	15196000	15196399
Chr1	32683200	32683399	49	59	99	66	87	1.10935	0.00433459	up		LOC_Os11g47520	Chr11	28730000	28730999
Chr1	32701800	32702599	333	390	171	119	101	-0.818551	0.0201251	down		LOC_Os04g29880	Chr4	17817600	17818799
Chr1	32722400	32723199	212	194	274	223	242	0.793871	0.029862	up		LOC_Os11g47510	Chr11	28727800	28729199
Chr1	32791400	32793399	544	650	791	540	771	0.654276	0.029643	up		LOC_Os11g47350	Chr11	28483200	28484199
Chr1	3279200	3279799	108	165	237	187	243	1.15814	0.00291402	up		LOC_Os11g45740	Chr11	27670800	27671799
Chr1	3288200	3288999	170	205	307	202	233	0.935628	0.00910068	up		LOC_Os11g12600	Chr11	7078600	7079199
Chr1	3291000	3291599	124	154	280	198	214	1.28487	1.62865e-05	up		LOC_Os04g12560	Chr4	6956800	6957999
Chr1	3294800	3295199	74	120	149	125	159	1.02832	0.0200598	up		LOC_Os11g45330	Chr11	27429800	27430799
Chr1	32948000	32949199	377	387	484	388	459	0.696835	0.0302964	up		LOC_Os11g45400	Chr11	27486800	27487599
Chr1	32965200	32965999	252	251	333	247	318	0.702629	0.042372	up		LOC_Os02g40080	Chr2	24267200	24267799
Chr1	32985000	32985399	87	75	134	93	153	0.97298	0.0299039	up		LOC_Os11g12560	Chr11	7061000	7061799
Chr1	3299200	3299799	131	104	174	142	164	0.923428	0.0383699	up		LOC_Os11g26910	Chr11	15459600	15459799
Chr1	3303400	3304199	146	209	288	230	276	1.06597	0.000703119	up		LOC_Os11g12530	Chr11	7014400	7014999
Chr1	3314800	3315599	171	189	285	217	249	0.984405	0.00258779	up		LOC_Os09g27200	Chr9	16535400	16535799
Chr1	33163000	33163799	197	229	266	231	260	0.742099	0.048327	up		LOC_Os06g26170	Chr6	15311200	15311799
Chr1	33221000	33221399	172	143	63	42	47	-1.1036	0.00994817	down		LOC_Os11g47140	Chr11	28361600	28362399
Chr1	3322600	3322999	104	117	168	141	95	0.997632	0.00679009	up		LOC_Os05g33620	Chr5	19776400	19776799
Chr1	33347800	33348199	96	95	166	112	149	1.03174	0.00399321	up		LOC_Os11g47960	Chr11	28932200	28932799
Chr1	33379200	33380199	352	388	125	100	122	-1.20927	0.00212393	down		LOC_Os02g40110	Chr2	24283800	24285199
Chr1	33722200	33724599	875	832	362	261	393	-0.963137	0.0015651	down		LOC_Os11g47550	Chr11	28736000	28736799
Chr1	33865600	33867199	541	568	264	175	235	-0.84785	0.00638425	down		LOC_Os04g25560	Chr4	14819200	14819599
Chr1	33876600	33876999	107	117	165	122	148	0.859382	0.0114963	up		LOC_Os11g33330	Chr11	19717800	19718399
Chr1	33896800	33898199	293	308	437	326	443	0.844455	0.01456	up		LOC_Os12g13650	Chr12	7676400	7676799
Chr1	33937400	33937999	169	168	254	193	174	0.90724	0.00834815	up		LOC_Os10g39744	Chr10	21241000	21242599
Chr1	33968200	33968999	181	189	280	200	210	0.871655	0.00977199	up		LOC_Os04g26870	Chr4	15889600	15890999
Chr1	34119400	34119799	97	72	139	117	177	1.09627	0.0114578	up		LOC_Os11g45980	Chr11	27820200	27820999
Chr1	34177400	34178199	260	308	144	104	149	-0.692347	0.0416404	down		LOC_Os03g15480	Chr3	8501200	8501599
Chr1	34278400	34278799	106	115	149	123	137	0.810258	0.0323833	up		LOC_Os09g19380	Chr9	11604000	11604399
Chr1	34356400	34356999	153	105	246	179	181	1.19808	0.00577129	up		LOC_Os11g47350	Chr11	28484600	28485599
Chr1	34438000	34438799	136	176	251	182	212	0.979836	0.00119899	up		LOC_Os01g09570	Chr1	4904200	4904999
Chr1	34567400	34568199	217	194	362	255	322	1.07286	0.00312924	up		LOC_Os03g14790	Chr3	8038600	8039199
Chr1	34655000	34655599	144	142	231	158	212	0.934122	0.00457236	up		LOC_Os04g29410	Chr4	17485600	17486799
Chr1	34658600	34659799	308	280	384	310	391	0.739847	0.0485768	up		LOC_Os02g13430	Chr2	7172600	7172799
Chr1	34699600	34701199	364	385	482	379	496	0.706688	0.0207214	up		LOC_Os11g33440	Chr11	19809600	19810599
Chr1	34701800	34702599	224	294	362	272	316	0.803028	0.0107979	up		LOC_Os07g42030	Chr7	25156800	25157199
Chr1	34734600	34734999	101	115	172	125	89	0.961423	0.00384152	up		LOC_Os11g12530	Chr11	7012000	7013999
Chr1	34796000	34796999	302	310	420	302	356	0.734026	0.01803	up		LOC_Os11g46250	Chr11	28010800	28011999
Chr1	35031200	35031999	341	358	160	128	150	-0.77368	0.0167783	down		LOC_Os02g34090	Chr2	20392800	20393199
Chr1	35156000	35157399	307	354	435	301	391	0.652492	0.0443692	up		LOC_Os03g11800	Chr3	6174800	6175199
Chr1	3528600	3528999	124	104	196	114	109	0.911457	0.0297894	up		LOC_Os04g30010	Chr4	17909000	17909799
Chr1	35402200	35404999	552	651	827	740	1036	0.906472	0.0037928	up		LOC_Os02g12470	Chr2	6503600	6503999
Chr1	35758000	35758799	226	212	315	237	265	0.829542	0.0146134	up		LOC_Os11g46250	Chr11	28003400	28005799
Chr1	36066800	36067199	117	100	155	125	107	0.866508	0.0335142	up		LOC_Os06g08884	Chr6	4470600	4470999
Chr1	36147200	36147799	128	114	204	136	211	0.974198	0.00766476	up		LOC_Os02g39140	Chr2	23643000	23643199
Chr1	36201600	36202799	418	508	131	87	103	-1.58823	7.68331e-10	down		LOC_Os09g14760	Chr9	8775600	8776799
Chr1	36244600	36245799	401	477	225	148	188	-0.740007	0.0311136	down		LOC_Os11g06230	Chr11	2977200	2977799
Chr1	36340800	36341799	336	367	121	90	155	-1.23481	1.16626e-05	down		LOC_Os04g20920	Chr4	11743800	11744799
Chr1	36430800	36431399	152	139	248	150	242	0.926863	0.0124423	up		LOC_Os11g41170	Chr11	24673000	24674199
Chr1	36527800	36528599	224	229	318	244	301	0.81272	0.0237978	up		LOC_Os06g23460	Chr6	13697000	13697599
Chr1	36675800	36676399	167	192	257	184	235	0.797621	0.0172635	up		LOC_Os09g09450	Chr9	5087600	5088599
Chr1	36691200	36691999	183	211	259	218	274	0.791884	0.0264259	up		LOC_Os11g12740	Chr11	7194000	7194599
Chr1	36694600	36695399	199	222	271	209	265	0.695425	0.0388638	up		LOC_Os11g20500	Chr11	11878600	11878999
Chr1	36784000	36785199	345	315	515	391	468	0.951603	0.0137461	up		LOC_Os09g19340	Chr9	11567600	11568799
Chr1	3733600	3733999	143	140	174	162	150	0.765099	0.0487787	up		LOC_Os04g14680	Chr4	8241400	8241999
Chr1	37347000	37347599	159	137	225	154	183	0.839958	0.0351113	up		LOC_Os04g13050	Chr4	7198000	7198799
Chr1	37617200	37617599	87	109	129	102	133	0.749267	0.0439347	up		LOC_Os11g05230	Chr11	2318800	2319199
Chr1	37927600	37928799	364	427	110	73	90	-1.61583	6.77858e-07	down		LOC_Os08g15204	Chr8	9191600	9191799
Chr1	37964000	37964999	424	458	214	130	199	-0.874616	0.00584837	down		LOC_Os03g26300	Chr3	15039200	15039999
Chr1	37985000	37985599	125	132	172	134	164	0.756411	0.0306502	up		LOC_Os02g54040	Chr2	33102000	33102999
Chr1	37994200	37995599	417	421	583	463	598	0.824205	0.0229803	up		LOC_Os11g47700	Chr11	28785200	28785799
Chr1	38095400	38096399	369	437	115	70	122	-1.63353	4.27114e-07	down		LOC_Os09g04810	Chr9	2565200	2565599
Chr1	38123000	38123799	195	243	289	213	260	0.703805	0.024311	up		LOC_Os11g45270	Chr11	27394400	27395399
Chr1	38132200	38132599	96	57	147	122	120	1.30002	0.00909779	up		LOC_Os12g04110	Chr12	1721400	1721999
Chr1	38151400	38151999	134	161	188	178	250	0.839367	0.0231852	up		LOC_Os01g16980	Chr1	9711800	9711999
Chr1	38204200	38205399	393	468	159	98	162	-1.2539	6.30405e-05	down		LOC_Os04g29960	Chr4	17876400	17877199
Chr1	38567200	38567999	289	326	149	113	124	-0.726254	0.0449828	down		LOC_Os03g11810	Chr3	6179000	6179399
Chr1	38772000	38772399	101	112	142	110	137	0.74865	0.0416324	up		LOC_Os03g25340	Chr3	14480400	14480799
Chr1	38818600	38819399	240	196	331	243	349	0.883005	0.0236855	up		LOC_Os01g31470	Chr1	17217800	17218199
Chr1	38876000	38878999	927	1073	420	325	605	-0.916295	0.000895005	down		LOC_Os10g05290	Chr10	2614200	2615199
Chr1	389400	390199	162	133	227	180	179	0.959034	0.0202356	up		LOC_Os02g39320	Chr2	23743200	23743799
Chr1	3901000	3901999	244	212	368	273	327	0.981879	0.00376558	up		LOC_Os02g39330	Chr2	23743200	23743799
Chr1	39145800	39146599	304	321	154	118	204	-0.697913	0.0391451	down		LOC_Os03g15070	Chr3	8239800	8240199
Chr1	39161400	39162199	245	332	139	97	102	-0.782807	0.0261823	down		LOC_Os02g40760	Chr2	24700800	24701999
Chr1	3928200	3929599	380	426	525	421	583	0.741757	0.0367802	up		LOC_Os01g20750	Chr1	11558000	11558599
Chr1	39302800	39303799	230	269	307	258	281	0.695814	0.0347233	up		LOC_Os09g19140	Chr9	11433600	11434199
Chr1	39354800	39355199	84	109	153	125	163	1.0448	0.0190351	up		LOC_Os03g01760	Chr3	479200	479599
Chr1	39379000	39379599	101	131	241	150	181	1.24642	7.32676e-05	up		LOC_Os01g08570	Chr1	4263600	4264199
Chr1	39423600	39424399	280	302	82	51	79	-1.64086	1.3876e-07	down		LOC_Os04g11790	Chr4	6456600	6456999
Chr1	39473400	39473799	123	111	183	122	134	0.866053	0.0368274	up		LOC_Os11g33320	Chr11	19707600	19708399
Chr1	39480400	39481599	253	248	327	259	305	0.728782	0.0290119	up		LOC_Os04g55180	Chr4	32806800	32807399
Chr1	39608200	39609999	420	409	567	432	629	0.767348	0.0254587	up		LOC_Os07g17400	Chr7	10274200	10274599
Chr1	39661800	39662599	282	286	136	100	121	-0.769981	0.024125	down		LOC_Os02g05730	Chr2	2824800	2825199
Chr1	39891000	39892399	333	429	505	383	460	0.732785	0.0323539	up		LOC_Os02g05744	Chr2	2824800	2825199
Chr1	39912600	39913799	236	205	359	252	337	0.955577	0.00615087	up		LOC_Os11g40790	Chr11	24396800	24397599
Chr1	3995000	3996399	323	384	441	341	449	0.655168	0.0371458	up		LOC_Os12g06670	Chr12	3243600	3244199
Chr1	40203000	40203599	161	147	223	170	201	0.847583	0.0313	up		LOC_Os12g20260	Chr12	11822600	11823399
Chr1	40305400	40306199	154	156	252	180	244	0.973989	0.00192432	up		LOC_Os04g31140	Chr4	18618600	18619399
Chr1	40370000	40370599	121	143	183	136	169	0.778325	0.0232462	up		LOC_Os04g31150	Chr4	18618600	18619399
Chr1	405200	405599	94	99	144	108	117	0.886409	0.0139159	up		LOC_Os04g28170	Chr4	16642200	16642799
Chr1	40546000	40546599	98	167	209	168	176	1.03753	0.00731203	up		LOC_Os10g07544	Chr10	4045200	4045799
Chr1	40551800	40552399	146	188	231	169	235	0.767907	0.0251918	up		LOC_Os04g13190	Chr4	7288400	7288999
Chr1	40684400	40685799	469	497	212	171	279	-0.827589	0.00848959	down		LOC_Os01g06960	Chr1	3291000	3291599
Chr1	4099200	4099599	97	117	147	120	122	0.832876	0.0186097	up		LOC_Os09g16458	Chr9	10078600	10079399
Chr1	41106400	41107599	444	472	549	436	538	0.611648	0.049394	up		LOC_Os07g27970	Chr7	16318200	16318599
Chr1	41113600	41114599	322	271	434	307	412	0.804717	0.0486794	up		LOC_Os05g28500	Chr5	16686800	16686999
Chr1	41188000	41188599	215	245	304	244	274	0.763771	0.0363933	up		LOC_Os09g25150	Chr9	15078600	15079199
Chr1	41251000	41251599	151	155	279	195	194	1.12446	0.0019571	up		LOC_Os07g10690	Chr7	5805200	5805599
Chr1	41273600	41274199	153	189	267	182	195	0.892137	0.0144863	up		LOC_Os08g32870	Chr8	20379800	20380199
Chr1	41389600	41390199	167	210	257	177	288	0.704474	0.0465691	up		LOC_Os06g39590	Chr6	23502000	23502399
Chr1	41658000	41658799	180	238	331	243	310	0.967044	0.00212866	up		LOC_Os08g43360	Chr8	27397600	27397999
Chr1	41893400	41894799	522	581	279	185	285	-0.757345	0.0257291	down		LOC_Os07g35750	Chr7	21418400	21419199
Chr1	41977200	41977999	186	210	284	218	284	0.848548	0.00664548	up		LOC_Os02g33010	Chr2	19629200	19629599
Chr1	42067000	42067799	190	217	318	234	292	0.942626	0.00256654	up		LOC_Os08g17220	Chr8	10546600	10546999
Chr1	42074400	42075399	245	275	361	251	379	0.731938	0.0149419	up		LOC_Os11g28480	Chr11	16394800	16395399
Chr1	42076400	42077799	315	384	474	326	388	0.69431	0.0174345	up		LOC_Os08g09050	Chr8	5256000	5256599
Chr1	42084600	42085799	243	263	318	281	327	0.761454	0.0249878	up		LOC_Os11g25980	Chr11	14828800	14828999
Chr1	42094800	42095599	173	209	234	186	189	0.649087	0.049485	up		LOC_Os12g10200	Chr12	5394200	5394799
Chr1	42281400	42281999	131	127	177	137	173	0.783848	0.0367475	up		LOC_Os03g24650	Chr3	14043200	14043799
Chr1	42325600	42326799	223	270	383	322	394	1.03468	0.000311332	up		LOC_Os09g25220	Chr9	15110800	15111399
Chr1	4254400	4255399	222	251	292	236	315	0.669824	0.035641	up		LOC_Os09g22140	Chr9	13404800	13405399
Chr1	4263600	4264199	122	133	268	182	153	1.31298	3.92891e-05	up		LOC_Os12g35010	Chr12	21312200	21312599
Chr1	42727200	42728199	245	216	351	288	345	0.9721	0.0116383	up		LOC_Os09g10054	Chr9	5479200	5480199
Chr1	42752600	42754199	565	658	301	226	338	-0.708878	0.0155038	down		LOC_Os11g32900	Chr11	19433400	19433799
Chr1	42970400	42970999	164	177	258	174	225	0.834142	0.00897658	up		LOC_Os01g67750	Chr1	39379000	39379599
Chr1	43194000	43195399	333	327	503	402	488	0.959163	0.00185267	up		LOC_Os07g04310	Chr7	1902800	1903599
Chr1	4697400	4698199	180	166	326	239	329	1.20018	0.000263654	up		LOC_Os04g55760	Chr4	33193000	33193399
Chr1	4736800	4737599	182	165	260	203	279	0.914015	0.0107454	up		LOC_Os03g26280	Chr3	15029400	15030799
Chr1	4758200	4759599	261	243	407	292	329	0.962376	0.00368055	up		LOC_Os01g50040	Chr1	28746200	28746599
Chr1	4904200	4904999	143	91	272	208	108	1.51547	0.00118311	up		LOC_Os06g11900	Chr6	6333800	6335199
Chr1	4913200	4913799	113	139	199	153	165	0.992005	0.00181709	up		LOC_Os03g59560	Chr3	33901200	33901799
Chr1	4924800	4925799	214	180	319	274	263	1.09344	0.00286552	up		LOC_Os02g13710	Chr2	7365200	7365599
Chr1	4956400	4956999	115	144	218	156	195	1.03452	0.00153829	up		LOC_Os06g29100	Chr6	16589400	16590399
Chr1	4958200	4959199	193	168	314	236	310	1.09967	0.00172852	up		LOC_Os02g40454	Chr2	24529400	24530999
Chr1	4964200	4964799	64	40	190	136	97	2.12475	4.27227e-07	up		LOC_Os10g17960	Chr10	9104200	9104999
Chr1	5188400	5189199	186	197	264	186	194	0.728379	0.0249853	up		LOC_Os01g03410	Chr1	1371600	1372999
Chr1	5563800	5564599	272	342	147	100	139	-0.812337	0.0156926	down		LOC_Os03g63390	Chr3	35820600	35820999
Chr1	5764800	5765599	199	206	263	212	236	0.736915	0.0337804	up		LOC_Os02g35060	Chr2	21040000	21040399
Chr1	5827400	5827799	109	89	173	124	131	1.06974	0.0354148	up		LOC_Os02g13260	Chr2	7062800	7063399
Chr1	58800	59599	207	247	321	237	304	0.80292	0.0204859	up		LOC_Os01g12870	Chr1	7128400	7128799
Chr1	5961600	5962199	119	103	176	158	229	1.09869	0.0364876	up		LOC_Os01g12880	Chr1	7128400	7128799
Chr1	5992400	5993599	370	457	106	69	117	-1.74286	4.42077e-09	down		LOC_Os09g19210	Chr9	11480000	11481199
Chr1	6015400	6015999	151	164	281	220	223	1.17606	2.4111e-05	up		LOC_Os11g08445	Chr11	4450400	4451799
Chr1	6024800	6025599	186	211	305	210	270	0.872109	0.00391935	up		LOC_Os02g21009	Chr2	12432200	12432799
Chr1	6030600	6032799	526	550	776	618	797	0.880046	0.0145617	up		LOC_Os02g40090	Chr2	24273000	24274199
Chr1	604800	605599	183	212	247	193	270	0.664662	0.0468758	up		LOC_Os03g28969	Chr3	16446000	16446399
Chr1	6097800	6098799	375	414	147	101	126	-1.17444	0.000713868	down		LOC_Os02g19380	Chr2	11317800	11318599
Chr1	6175000	6175399	148	136	211	148	150	0.826635	0.0451093	up		LOC_Os11g26930	Chr11	15486000	15486599
Chr1	6196000	6196799	263	320	129	98	106	-0.852465	0.008478	down		LOC_Os01g09260	Chr1	4697400	4698199
Chr1	6240200	6240799	149	187	255	171	222	0.841289	0.0091401	up		LOC_Os02g33335	Chr2	19801600	19802199
Chr1	6319000	6319799	196	196	293	203	314	0.830026	0.0451618	up		LOC_Os01g59410	Chr1	34356400	34356999
Chr1	6340800	6341399	135	167	191	151	180	0.69198	0.0454201	up		LOC_Os07g26660	Chr7	15376800	15377799
Chr1	6409800	6411399	392	450	534	439	529	0.722873	0.0186251	up		LOC_Os07g48340	Chr7	28889000	28889999
Chr1	6539200	6539599	86	98	147	114	140	1.01169	0.00361887	up		LOC_Os02g45230	Chr2	27477800	27478399
Chr1	6581200	6581999	194	224	270	231	274	0.779384	0.0426209	up		LOC_Os08g09420	Chr8	5457200	5457799
Chr1	660000	660799	426	431	196	125	118	-0.932815	0.0092363	down		LOC_Os12g02910	Chr12	1074800	1075399
Chr1	6914000	6914799	205	186	314	253	341	1.03689	0.0107809	up		LOC_Os11g07250	Chr11	3649200	3650399
Chr1	7001800	7002399	266	200	65	52	121	-1.50567	0.000595458	down		LOC_Os02g48440	Chr2	29664200	29664799
Chr1	7064600	7065199	142	122	189	142	186	0.818714	0.0340146	up		LOC_Os08g20570	Chr8	12350600	12350999
Chr1	7128400	7128799	86	106	179	135	182	1.21788	0.000218956	up		LOC_Os03g19760	Chr3	11104400	11104999
Chr1	7308000	7310799	678	712	1023	774	1117	0.871814	0.00516667	up		LOC_Os11g08400	Chr11	4429000	4429599
Chr1	738400	739799	367	433	547	432	463	0.803078	0.0201911	up		LOC_Os01g34540	Chr1	19053800	19054199
Chr1	744400	744999	133	142	192	149	158	0.815168	0.0222804	up		LOC_Os11g42590	Chr11	25633000	25634199
Chr1	749000	750199	302	336	449	352	360	0.836196	0.0154828	up		LOC_Os11g30400	Chr11	17669200	17669599
Chr1	7764800	7766199	349	347	476	395	436	0.831641	0.0137972	up		LOC_Os05g23860	Chr5	13715800	13716399
Chr1	7835600	7836199	312	249	116	84	112	-1.00463	0.0137973	down		LOC_Os06g17500	Chr6	10152600	10153599
Chr1	7870800	7871399	138	114	171	149	171	0.848713	0.0425671	up		LOC_Os12g25540	Chr12	14783200	14783799
Chr1	7885600	7886199	109	81	179	122	184	1.14136	0.00585261	up		LOC_Os11g08460	Chr11	4466600	4468199
Chr1	7936400	7937599	292	310	466	325	440	0.888069	0.00300525	up		LOC_Os11g47980	Chr11	28938000	28938799
Chr1	7984000	7984199	52	34	78	63	58	1.20439	0.0160246	up		LOC_Os07g39930	Chr7	23953200	23953999
Chr1	8040800	8042199	364	343	476	377	448	0.771355	0.0409039	up		LOC_Os01g06490	Chr1	3054200	3054999
Chr1	8158200	8158599	72	94	126	113	137	1.05027	0.00435899	up		LOC_Os06g02160	Chr6	647000	647599
Chr1	8577400	8577999	119	138	207	161	211	1.02643	0.000850039	up		LOC_Os05g11300	Chr5	6379200	6379399
Chr1	8796800	8797599	193	205	304	217	243	0.885202	0.0105443	up		LOC_Os12g05480	Chr12	2509800	2510399
Chr1	8948200	8949199	309	372	150	117	229	-0.84071	0.00844956	down		LOC_Os03g48560	Chr3	27678000	27678999
Chr1	9044200	9044799	136	185	227	162	189	0.78513	0.0253784	up		LOC_Os01g03270	Chr1	1328200	1329399
Chr1	9074400	9074799	121	151	185	134	136	0.735413	0.0490254	up		LOC_Os09g18400	Chr9	11292400	11293799
Chr1	9293200	9293599	73	109	139	109	122	0.965002	0.00962097	up		LOC_Os12g35750	Chr12	21766600	21767399
Chr1	9316000	9318599	615	817	898	669	935	0.642041	0.0435139	up		LOC_Os11g45620	Chr11	27607600	27608599
Chr1	9393000	9393399	91	110	150	110	125	0.87633	0.0118667	up		LOC_Os06g39708	Chr6	23573600	23573999
Chr1	9711800	9711999	50	37	107	55	72	1.35004	0.0236059	up		LOC_Os06g39712	Chr6	23573600	23573999
Chr1	9905800	9906199	76	120	144	101	172	0.833932	0.037601	up		LOC_Os04g31640	Chr4	18957000	18957599
Chr10	10150400	10151799	360	371	506	390	526	0.79605	0.00703077	up		LOC_Os02g28820	Chr2	17040000	17040399
Chr10	10207600	10208599	276	304	446	328	375	0.917473	0.000796001	up		LOC_Os02g08080	Chr2	4268400	4268799
Chr10	102200	103399	252	276	325	260	341	0.656728	0.0425069	up		LOC_Os04g17100	Chr4	9367800	9369399
Chr10	10260200	10260599	75	60	188	137	153	1.75579	1.16592e-06	up		LOC_Os02g45140	Chr2	27379000	27379799
Chr10	10270200	10271999	423	463	557	423	565	0.649366	0.0244	up		LOC_Os03g49630	Chr3	28265800	28266399
Chr10	10356400	10356999	183	156	265	174	231	0.851573	0.0263829	up		LOC_Os06g09900	Chr6	5045600	5046399
Chr10	10452000	10452599	232	248	107	79	111	-0.867705	0.0135828	down		LOC_Os07g35390	Chr7	21166400	21167999
Chr10	10538400	10540199	490	463	641	483	664	0.73354	0.0343784	up		LOC_Os08g03710	Chr8	1760000	1760799
Chr10	10554000	10555399	387	406	523	423	464	0.762649	0.0191721	up		LOC_Os05g32020	Chr5	18657400	18658199
Chr10	10560200	10561999	410	466	584	462	505	0.76589	0.0199991	up		LOC_Os03g04110	Chr3	1879000	1879599
Chr10	1061000	1061399	87	71	129	101	153	1.03668	0.0139169	up		LOC_Os09g25290	Chr9	15138800	15139999
Chr10	10621200	10621999	261	280	102	66	113	-1.19714	0.000774314	down		LOC_Os06g14406	Chr6	8043400	8043799
Chr10	10630000	10630799	160	164	262	193	242	0.988305	0.00148441	up		LOC_Os12g03150	Chr12	1200800	1201399
Chr10	10728400	10729199	218	296	338	267	372	0.753596	0.0484492	up		LOC_Os12g26300	Chr12	15348000	15349199
Chr10	10730400	10730799	92	96	138	106	114	0.879296	0.0168606	up		LOC_Os12g31480	Chr12	18933000	18933399
Chr10	10744200	10745199	224	217	322	235	258	0.831431	0.0105502	up		LOC_Os10g04730	Chr10	2257600	2258399
Chr10	11119200	11120399	378	357	475	384	524	0.72765	0.0389469	up		LOC_Os10g04660	Chr10	2221000	2222399
Chr10	11142400	11144399	436	352	666	542	481	1.11163	0.00537745	up		LOC_Os10g37490	Chr10	20073800	20074199
Chr10	11152000	11152999	195	234	316	217	272	0.812104	0.00693792	up		LOC_Os11g47870	Chr11	28871000	28871999
Chr10	11167200	11168599	281	276	338	298	364	0.704605	0.049592	up		LOC_Os11g30350	Chr11	17616000	17617999
Chr10	11173000	11173999	198	248	298	252	312	0.823284	0.0240824	up		LOC_Os03g56100	Chr3	31962400	31962999
Chr10	11289200	11290399	276	355	411	335	402	0.760764	0.0446702	up		LOC_Os07g18300	Chr7	10847000	10847399
Chr10	11588200	11588999	203	195	313	235	238	0.958368	0.00229416	up		LOC_Os11g08470	Chr11	4476800	4477399
Chr10	11652000	11653199	328	397	477	355	368	0.705422	0.0128883	up		LOC_Os10g39750	Chr10	21245600	21246999
Chr10	11661200	11661799	149	170	228	173	201	0.835871	0.0393041	up		LOC_Os01g45410	Chr1	25768400	25768799
Chr10	11673800	11674599	246	265	129	88	114	-0.741555	0.048839	down		LOC_Os11g42450	Chr11	25551600	25552199
Chr10	1170000	1170799	209	125	307	215	269	1.10967	0.0369086	up		LOC_Os02g35190	Chr2	21156200	21156599
Chr10	11717400	11718599	352	379	452	359	396	0.657291	0.0316244	up		LOC_Os07g30120	Chr7	17771800	17772399
Chr10	11723200	11723999	160	176	236	191	229	0.855654	0.00664176	up		LOC_Os12g01744	Chr12	449400	449799
Chr10	11732000	11732999	211	223	368	250	305	1.00155	0.00162622	up		LOC_Os05g24020	Chr5	13848200	13848999
Chr10	1180800	1181599	171	206	240	196	243	0.724513	0.0295999	up		LOC_Os07g29860	Chr7	17569600	17569999
Chr10	11866200	11866999	172	214	279	203	296	0.826328	0.0231692	up		LOC_Os08g21660	Chr8	12912800	12914999
Chr10	12150400	12151199	189	172	248	207	221	0.838194	0.0270955	up		LOC_Os08g21670	Chr8	12912800	12914999
Chr10	12274200	12275199	257	261	336	293	300	0.793977	0.024255	up		LOC_Os09g19136	Chr9	11422200	11424399
Chr10	12301400	12302399	252	275	347	250	315	0.6788	0.0296019	up		LOC_Os12g27254	Chr12	16000000	16000599
Chr10	12311400	12312799	302	343	408	309	390	0.658104	0.0380138	up		LOC_Os11g41034	Chr11	24565000	24565799
Chr10	12337400	12338199	155	195	228	170	248	0.693766	0.036332	up		LOC_Os11g37530	Chr11	22157600	22158799
Chr10	12487000	12487799	161	186	231	202	228	0.838754	0.0132395	up		LOC_Os07g06680	Chr7	3258200	3259599
Chr10	12657200	12658599	441	506	223	178	218	-0.729446	0.0251474	down		LOC_Os11g13660	Chr11	7486400	7487399
Chr10	12878400	12879599	336	418	177	131	228	-0.784048	0.0144204	down		LOC_Os11g45220	Chr11	27366800	27368399
Chr10	12966600	12967799	495	492	249	158	200	-0.795815	0.0217022	down		LOC_Os07g17320	Chr7	10230400	10231199
Chr10	13083800	13084399	152	182	213	168	266	0.701066	0.0386452	up		LOC_Os04g14304	Chr4	8015400	8015799
Chr10	13254600	13255199	145	131	202	148	225	0.835162	0.0224221	up		LOC_Os08g03270	Chr8	1518200	1518599
Chr10	13619200	13619599	76	103	152	117	114	1.10147	0.00376558	up		LOC_Os02g51040	Chr2	31220400	31220999
Chr10	13627400	13628999	373	378	510	349	478	0.683464	0.0443634	up		LOC_Os11g07200	Chr11	3613600	3614999
Chr10	13649600	13652799	813	815	1031	822	1006	0.69108	0.0313932	up		LOC_Os05g10300	Chr5	5623200	5623799
Chr10	136600	137399	264	201	340	258	267	0.8487	0.0421962	up		LOC_Os03g56800	Chr3	32365600	32366399
Chr10	13735000	13735999	184	211	318	253	266	1.04216	0.000319441	up		LOC_Os04g21850	Chr4	12382000	12382599
Chr10	1395600	1395999	84	86	138	106	132	1.02382	0.00765654	up		LOC_Os03g59990	Chr3	34123800	34124399
Chr10	14016400	14016999	180	142	238	194	170	0.919355	0.0254688	up		LOC_Os12g32980	Chr12	19918600	19918999
Chr10	14072800	14073199	77	100	116	115	111	0.917611	0.0241447	up		LOC_Os09g27240	Chr9	16560400	16560999
Chr10	1419400	1419999	99	120	162	140	162	0.982697	0.00379972	up		LOC_Os09g13940	Chr9	8203000	8203199
Chr10	1436200	1437399	275	268	448	287	394	0.917965	0.0111916	up		LOC_Os01g55040	Chr1	31646400	31647599
Chr10	14424000	14424599	167	151	238	181	258	0.893119	0.0245156	up		LOC_Os01g71300	Chr1	41251000	41251599
Chr10	1462600	1463799	346	409	487	369	496	0.688659	0.0352289	up		LOC_Os09g16660	Chr9	10208800	10209399
Chr10	14798000	14799399	273	355	394	299	406	0.654228	0.0400124	up		LOC_Os11g14300	Chr11	8018400	8019199
Chr10	14832400	14833799	441	468	153	116	152	-1.25516	5.56832e-06	down		LOC_Os09g39060	Chr9	22422000	22422399
Chr10	14902200	14903399	266	230	380	310	431	0.975749	0.00890126	up		LOC_Os12g16680	Chr12	9555000	9555599
Chr10	1498800	1499399	159	174	236	165	222	0.764566	0.0322715	up		LOC_Os02g31300	Chr2	18778600	18779799
Chr10	15034800	15036999	581	563	782	574	728	0.73918	0.0339041	up		LOC_Os06g10720	Chr6	5597400	5598199
Chr10	15308800	15309399	145	171	214	165	243	0.770948	0.037189	up		LOC_Os11g39040	Chr11	23247800	23248399
Chr10	1535000	1535999	263	278	352	268	369	0.699091	0.0493272	up		LOC_Os03g26370	Chr3	15075800	15076599
Chr10	15473000	15473599	190	209	271	221	266	0.813293	0.0281836	up		LOC_Os07g41660	Chr7	24967800	24968199
Chr10	15503800	15504799	216	299	366	266	382	0.80632	0.0186882	up		LOC_Os11g10790	Chr11	5936400	5936999
Chr10	1554400	1555599	345	354	527	334	476	0.78301	0.0367557	up		LOC_Os02g40440	Chr2	24515800	24518199
Chr10	15799000	15799999	206	280	371	271	388	0.912451	0.0235535	up		LOC_Os06g18920	Chr6	10748200	10748799
Chr10	15972600	15973399	186	223	295	207	283	0.796351	0.0229539	up		LOC_Os03g46900	Chr3	26523400	26523599
Chr10	16100400	16102199	621	760	226	184	217	-1.23667	1.66978e-06	down		LOC_Os05g14034	Chr5	7845400	7846199
Chr10	16142200	16143199	279	312	399	287	323	0.714746	0.0307492	up		LOC_Os05g46040	Chr5	26708000	26708199
Chr10	16216200	16217199	217	228	306	211	318	0.709252	0.0457863	up		LOC_Os07g25600	Chr7	14677400	14677799
Chr10	16361800	16362399	139	134	192	155	171	0.849999	0.0190705	up		LOC_Os06g19660	Chr6	11219800	11220199
Chr10	16390200	16390999	302	309	93	57	98	-1.54119	2.61663e-07	down		LOC_Os02g47980	Chr2	29363000	29363599
Chr10	16522200	16523799	335	366	514	364	481	0.821528	0.0225599	up		LOC_Os11g43540	Chr11	26280000	26280399
Chr10	16534200	16534599	95	60	138	106	102	1.1358	0.0243058	up		LOC_Os11g33942	Chr11	19839400	19839999
Chr10	16577000	16578599	387	440	534	449	519	0.765319	0.0100072	up		LOC_Os09g02780	Chr9	1272200	1272999
Chr10	1670200	1671599	279	306	388	348	362	0.851805	0.00891455	up		LOC_Os03g07620	Chr3	3874000	3874599
Chr10	16775000	16775999	234	245	344	246	362	0.797005	0.00865976	up		LOC_Os10g35520	Chr10	18998600	18999199
Chr10	1683200	1684199	248	284	327	283	322	0.716064	0.0332514	up		LOC_Os01g56650	Chr1	32683200	32683399
Chr10	1704000	1704999	242	257	338	265	358	0.778658	0.0111831	up		LOC_Os01g54880	Chr1	31563600	31564199
Chr10	17087200	17087999	205	210	270	227	301	0.770665	0.0358005	up		LOC_Os11g39130	Chr11	23290600	23291599
Chr10	1709400	1710199	226	285	347	268	289	0.779442	0.0126114	up		LOC_Os11g47820	Chr11	28841600	28842999
Chr10	1716600	1718199	379	427	560	468	565	0.866281	0.0126114	up		LOC_Os11g05790	Chr11	2677600	2678199
Chr10	17215600	17215999	74	124	143	113	136	0.896088	0.0376579	up		LOC_Os12g17950	Chr12	10320800	10321799
Chr10	1739600	1741199	345	354	480	354	440	0.752663	0.0111537	up		LOC_Os08g23754	Chr8	14373600	14374199
Chr10	17437200	17437799	154	136	239	165	176	0.963141	0.0199937	up		LOC_Os07g05940	Chr7	2870400	2872399
Chr10	1772800	1773599	220	250	327	271	279	0.861735	0.0115069	up		LOC_Os02g01080	Chr2	44200	44799
Chr10	1778400	1778999	174	145	258	162	194	0.869895	0.0343548	up		LOC_Os12g17280	Chr12	9887200	9887799
Chr10	18147200	18147999	348	434	149	101	100	-1.14476	0.000621121	down		LOC_Os11g14810	Chr11	8333800	8334199
Chr10	18252600	18253399	188	219	297	191	205	0.753422	0.025252	up		LOC_Os07g38210	Chr7	22917600	22919399
Chr10	18288000	18288799	218	222	286	218	283	0.696809	0.044796	up		LOC_Os02g26160	Chr2	15363200	15363799
Chr10	18445200	18446399	249	257	376	287	359	0.89149	0.00768417	up		LOC_Os03g20680	Chr3	11699800	11700199
Chr10	18463600	18464999	290	312	377	315	410	0.713434	0.0338147	up		LOC_Os09g03580	Chr9	1764400	1765199
Chr10	18606400	18608399	833	800	347	273	362	-0.897161	0.00544546	down		LOC_Os03g31944	Chr3	18280400	18280799
Chr10	1862600	1863599	218	258	308	251	291	0.746311	0.0321677	up		LOC_Os03g31950	Chr3	18280400	18280799
Chr10	18784600	18785399	235	187	310	231	282	0.844779	0.0408671	up		LOC_Os01g05630	Chr1	2686400	2686799
Chr10	18998600	18999199	131	157	261	179	189	1.11025	0.000156727	up		LOC_Os11g13560	Chr11	7436000	7436799
Chr10	19193600	19194199	140	164	200	151	199	0.71374	0.0403716	up		LOC_Os06g14030	Chr6	7806000	7806799
Chr10	19235200	19236799	565	643	291	210	314	-0.768851	0.0104955	down		LOC_Os09g11180	Chr9	6197400	6197999
Chr10	19335600	19336999	413	525	175	101	140	-1.27772	0.000270977	down		LOC_Os10g37720	Chr10	20184600	20185199
Chr10	19587200	19587799	130	110	189	145	145	0.970389	0.0157223	up		LOC_Os10g37730	Chr10	20184600	20185199
Chr10	19635000	19635799	195	221	270	247	240	0.837323	0.0253544	up		LOC_Os04g08470	Chr4	4568600	4569799
Chr10	19674000	19674599	297	224	91	85	104	-1.06308	0.0295221	down		LOC_Os03g21964	Chr3	12567800	12568399
Chr10	19680200	19681199	329	395	179	126	167	-0.745515	0.0257291	down		LOC_Os10g19230	Chr10	9788400	9788999
Chr10	19767200	19768399	279	315	380	339	471	0.797157	0.0267499	up		LOC_Os06g19570	Chr6	11144000	11145399
Chr10	19844600	19845799	455	466	87	61	112	-2.14415	6.88347e-12	down		LOC_Os08g41910	Chr8	26464400	26464999
Chr10	19961600	19962199	160	149	226	179	200	0.890988	0.0118639	up		LOC_Os06g23380	Chr6	13647400	13648199
Chr10	20073800	20074199	82	77	136	113	170	1.15309	0.0014361	up		LOC_Os04g37930	Chr4	22559200	22559999
Chr10	20116000	20116599	208	264	91	81	95	-0.934697	0.0074787	down		LOC_Os12g24650	Chr12	14109800	14110199
Chr10	20184600	20185199	147	147	230	208	250	1.09178	0.00268849	up		LOC_Os01g24240	Chr1	13661200	13661399
Chr10	2045800	2046399	258	257	131	82	103	-0.79013	0.0343125	down		LOC_Os03g41070	Chr3	22825800	22826399
Chr10	2054400	2055199	202	197	281	236	216	0.881992	0.0126884	up		LOC_Os08g44070	Chr8	27756400	27756999
Chr10	20637800	20638999	275	280	372	311	406	0.809344	0.0287824	up		LOC_Os09g19340	Chr9	11569800	11570599
Chr10	20667600	20668199	141	160	227	145	237	0.796157	0.0177722	up		LOC_Os02g02080	Chr2	610800	611599
Chr10	2071600	2072399	226	255	315	228	245	0.675812	0.0345454	up		LOC_Os11g17610	Chr11	9819600	9820199
Chr10	2080000	2081199	279	299	439	340	435	0.935439	0.00214648	up		LOC_Os03g38970	Chr3	21659600	21660999
Chr10	21086200	21086599	115	128	178	137	163	0.880261	0.011779	up		LOC_Os10g05088	Chr10	2493200	2494799
Chr10	21156600	21157199	141	174	218	172	222	0.820934	0.0236006	up		LOC_Os09g18159	Chr9	11132600	11133199
Chr10	2121200	2121999	150	136	207	178	266	0.935985	0.0252306	up		LOC_Os07g11050	Chr7	6089800	6090799
Chr10	21241000	21242599	217	195	513	365	299	1.57978	3.1896e-08	up		LOC_Os12g05130	Chr12	2264600	2265199
Chr10	21245600	21246999	220	231	395	309	367	1.14746	5.1637e-05	up		LOC_Os11g09260	Chr11	4965400	4965999
Chr10	21249800	21250199	103	64	179	113	81	1.26723	0.0105946	up		LOC_Os07g26060	Chr7	14946800	14947799
Chr10	21373600	21374999	339	324	425	332	407	0.691236	0.0420702	up		LOC_Os01g26920	Chr1	14997600	14998199
Chr10	2165400	2165799	111	77	173	133	93	1.1881	0.00658198	up		LOC_Os12g27840	Chr12	16406000	16406599
Chr10	21822800	21823599	230	205	336	248	276	0.91632	0.00918335	up		LOC_Os02g29040	Chr2	17204200	17204599
Chr10	22065200	22066399	291	340	492	317	399	0.849637	0.00437668	up		LOC_Os03g43460	Chr3	24240000	24240999
Chr10	2221000	2222399	275	213	409	358	470	1.15358	0.00433334	up		LOC_Os11g08470	Chr11	4479800	4480799
Chr10	22318000	22318999	429	431	215	157	183	-0.713342	0.0308961	down		LOC_Os11g10880	Chr11	5998400	5999399
Chr10	22421400	22422399	363	413	128	88	118	-1.34767	5.88801e-06	down		LOC_Os12g16600	Chr12	9498600	9499199
Chr10	22552200	22552799	152	168	214	157	178	0.714762	0.0304244	up		LOC_Os05g36050	Chr5	21344200	21344599
Chr10	22562600	22563199	166	163	236	187	207	0.865572	0.0170802	up		LOC_Os01g28160	Chr1	15781600	15781999
Chr10	2257600	2258399	149	174	288	218	298	1.1542	4.94142e-05	up		LOC_Os01g59760	Chr1	34567400	34568199
Chr10	2283400	2284399	242	238	302	243	310	0.687541	0.0499439	up		LOC_Os09g38730	Chr9	22260400	22260999
Chr10	22889400	22889999	252	235	105	74	92	-0.954099	0.00872768	down		LOC_Os04g53810	Chr4	32064400	32064799
Chr10	2309000	2309399	104	114	210	156	139	1.24983	5.20732e-05	up		LOC_Os07g37660	Chr7	22579800	22580999
Chr10	2324800	2325399	132	158	209	182	208	0.951397	0.00478265	up		LOC_Os04g31210	Chr4	18676600	18676999
Chr10	2329400	2330799	334	266	464	438	285	1.09854	0.00628624	up		LOC_Os11g16520	Chr11	9141800	9142599
Chr10	2335200	2336999	398	469	573	496	498	0.82304	0.00487995	up		LOC_Os04g47906	Chr4	28486600	28487199
Chr10	2356400	2357399	124	206	281	261	292	1.25999	0.00128904	up		LOC_Os06g06860	Chr6	3245600	3246399
Chr10	2362400	2363199	163	195	254	190	222	0.817098	0.00897426	up		LOC_Os08g05720	Chr8	3069800	3070599
Chr10	2367600	2368399	137	207	279	197	251	0.980385	0.00593194	up		LOC_Os01g10920	Chr1	5827400	5827799
Chr10	2370000	2370999	211	165	381	224	274	1.14825	0.00404025	up		LOC_Os07g38230	Chr7	22927600	22928399
Chr10	2412800	2413399	110	149	225	155	166	1.0574	0.00191955	up		LOC_Os12g24090	Chr12	13705400	13705799
Chr10	2493200	2494799	309	278	467	406	472	1.0806	0.00288219	up		LOC_Os10g05960	Chr10	3004600	3004999
Chr10	2509400	2509999	194	163	247	211	203	0.862231	0.0299983	up		LOC_Os04g29740	Chr4	17726800	17727399
Chr10	2515600	2516799	156	191	405	318	417	1.57162	1.39254e-08	up		LOC_Os01g21820	Chr1	12248000	12248399
Chr10	2586000	2586599	163	153	212	160	168	0.731972	0.0437415	up		LOC_Os11g41350	Chr11	24809800	24810799
Chr10	2605600	2605999	77	109	131	108	105	0.88233	0.0199418	up		LOC_Os01g07010	Chr1	3303400	3304199
Chr10	2606400	2607399	181	176	264	208	220	0.904907	0.0084018	up		LOC_Os02g54050	Chr2	33107600	33108599
Chr10	2609000	2609599	144	188	232	156	164	0.725821	0.0346118	up		LOC_Os09g13080	Chr9	7536800	7536999
Chr10	2614200	2615199	172	199	364	293	331	1.337	3.12552e-05	up		LOC_Os07g45060	Chr7	26882400	26882799
Chr10	2635600	2635999	103	94	141	119	129	0.906011	0.0187595	up		LOC_Os04g59624	Chr4	35452200	35452799
Chr10	2656000	2656399	85	89	135	107	113	0.981897	0.0187809	up		LOC_Os02g02770	Chr2	1048400	1049999
Chr10	2685600	2686599	227	209	317	250	300	0.87834	0.0158571	up		LOC_Os04g03220	Chr4	1367800	1368199
Chr10	2747200	2748399	300	319	435	301	392	0.743305	0.0168972	up		LOC_Os09g12260	Chr9	6988000	6988799
Chr10	2751600	2753599	559	575	820	620	607	0.844873	0.00452658	up		LOC_Os01g44394	Chr1	25470600	25471199
Chr10	2808400	2808999	188	167	239	198	217	0.802269	0.0356793	up		LOC_Os09g10610	Chr9	5787600	5788999
Chr10	2902000	2902599	170	142	227	171	217	0.841761	0.0416132	up		LOC_Os11g47650	Chr11	28774400	28775399
Chr10	2961800	2962199	106	96	174	138	111	1.12673	0.0170228	up		LOC_Os03g20760	Chr3	11751000	11751399
Chr10	2967400	2968199	182	210	275	188	171	0.73712	0.0190782	up		LOC_Os02g04100	Chr2	1784400	1785399
Chr10	2978000	2978599	141	145	206	164	207	0.877037	0.00874322	up		LOC_Os07g42994	Chr7	25755800	25756599
Chr10	3004600	3004999	101	91	165	121	141	1.06775	0.00695757	up		LOC_Os11g33310	Chr11	19701600	19702799
Chr10	3068400	3068999	137	215	245	180	186	0.789132	0.0334672	up		LOC_Os01g49070	Chr1	28198000	28198399
Chr10	3078000	3078599	156	99	240	143	134	1.04059	0.0447085	up		LOC_Os10g04940	Chr10	2412800	2413399
Chr10	3400200	3400799	172	152	215	182	185	0.797419	0.0419896	up		LOC_Os10g04950	Chr10	2412800	2413399
Chr10	3446000	3446799	164	139	217	203	206	0.983345	0.0195128	up		LOC_Os02g56750	Chr2	34793800	34794599
Chr10	3484000	3484599	210	234	79	67	101	-1.09324	0.00111732	down		LOC_Os06g20900	Chr6	12076400	12077399
Chr10	350200	351199	262	212	360	260	322	0.871167	0.0346146	up		LOC_Os07g31800	Chr7	18903800	18904799
Chr10	3651000	3651799	178	206	313	243	327	1.04258	0.000309462	up		LOC_Os04g10180	Chr4	5507000	5507599
Chr10	3697800	3698799	252	282	355	284	315	0.768925	0.0134939	up		LOC_Os12g28270	Chr12	16712200	16712799
Chr10	3701600	3702399	163	208	276	242	249	1.00619	0.00177627	up		LOC_Os12g44130	Chr12	27374600	27375599
Chr10	3723000	3723999	348	361	119	62	80	-1.4985	6.5941e-06	down		LOC_Os01g48270	Chr1	27666200	27666599
Chr10	3724400	3725399	268	232	340	269	260	0.780921	0.0414092	up		LOC_Os12g05320	Chr12	2389600	2389999
Chr10	4045200	4045799	120	138	242	199	268	1.28738	0.000228334	up		LOC_Os06g24990	Chr6	14641800	14641999
Chr10	4080800	4081799	167	194	279	217	348	0.967168	0.00113474	up		LOC_Os11g10170	Chr11	5514600	5514799
Chr10	4192600	4194199	456	428	601	502	621	0.825108	0.0486482	up		LOC_Os11g24570	Chr11	14026400	14026999
Chr10	4228200	4229199	247	279	369	277	347	0.800801	0.00570745	up		LOC_Os08g43390	Chr8	27422200	27422799
Chr10	4323200	4324199	279	298	368	270	361	0.644467	0.0415675	up		LOC_Os11g43895	Chr11	26507200	26507999
Chr10	435800	436599	204	251	280	233	327	0.69096	0.0393715	up		LOC_Os03g01320	Chr3	220200	220599
Chr10	4408000	4408599	114	107	225	171	174	1.33912	0.000101414	up		LOC_Os08g33210	Chr8	20699200	20699399
Chr10	4444600	4445199	207	272	105	80	110	-0.86041	0.0153189	down		LOC_Os07g08320	Chr7	4258400	4258999
Chr10	4452200	4452799	165	146	216	167	240	0.796223	0.0486528	up		LOC_Os04g54040	Chr4	32206400	32207399
Chr10	4533800	4534599	192	194	264	228	263	0.862587	0.0167979	up		LOC_Os09g16020	Chr9	9785800	9786399
Chr10	4543600	4543999	86	88	161	116	151	1.16823	0.000344368	up		LOC_Os01g25240	Chr1	14251800	14252399
Chr10	4558200	4558799	161	142	224	162	196	0.838537	0.0436837	up		LOC_Os04g13060	Chr4	7206600	7206999
Chr10	4725400	4726199	168	152	231	210	270	0.975133	0.00861411	up		LOC_Os03g22470	Chr3	12873000	12873599
Chr10	4727000	4727999	197	239	280	205	276	0.658916	0.0401298	up		LOC_Os11g10330	Chr11	5614000	5614799
Chr10	4882000	4882799	180	139	268	196	272	1.0245	0.00979189	up		LOC_Os11g04420	Chr11	1842800	1843399
Chr10	4894200	4894799	238	246	98	90	72	-0.849024	0.0235025	down		LOC_Os03g04740	Chr3	2259800	2260199
Chr10	4915600	4915999	96	65	148	91	153	1.03417	0.0329118	up		LOC_Os09g18360	Chr9	11267200	11267999
Chr10	4916400	4917199	203	174	280	258	328	1.0245	0.0165634	up		LOC_Os12g27760	Chr12	16368000	16368999
Chr10	49200	49599	129	123	188	155	139	0.950304	0.00657973	up		LOC_Os10g07004	Chr10	3651000	3651799
Chr10	4966200	4967799	455	441	609	426	446	0.697503	0.0273645	up		LOC_Os11g30370	Chr11	17641000	17641599
Chr10	5270800	5271199	182	206	96	65	71	-0.772165	0.0358479	down		LOC_Os11g09580	Chr11	5126800	5127599
Chr10	5283800	5284399	338	270	110	73	94	-1.25655	0.00225433	down		LOC_Os03g11840	Chr3	6202800	6203599
Chr10	5320600	5321199	139	127	194	141	213	0.825109	0.0246106	up		LOC_Os06g24404	Chr6	14286200	14286599
Chr10	5334800	5336399	343	395	455	379	486	0.691935	0.024815	up		LOC_Os11g19030	Chr11	10845200	10845599
Chr10	5359400	5359799	74	55	145	122	158	1.54821	5.56818e-05	up		LOC_Os07g38270	Chr7	22958400	22959199
Chr10	5587200	5587999	236	269	336	269	302	0.77183	0.0463094	up		LOC_Os07g32000	Chr7	19036200	19036599
Chr10	5710600	5711799	318	320	452	412	442	0.955932	0.00944857	up		LOC_Os02g26310	Chr2	15453400	15453799
Chr10	5714400	5715399	209	289	324	253	260	0.729976	0.0271481	up		LOC_Os02g44210	Chr2	26759400	26760199
Chr10	5804600	5804799	69	41	97	83	52	1.20058	0.0262525	up		LOC_Os01g70060	Chr1	40546000	40546599
Chr10	5976400	5978799	497	622	736	551	568	0.711059	0.00957532	up		LOC_Os03g31340	Chr3	17859200	17859599
Chr10	6106400	6106799	107	116	163	135	123	0.929226	0.00642702	up		LOC_Os01g12570	Chr1	6914000	6914799
Chr10	6177400	6177999	167	139	221	167	179	0.833388	0.0380501	up		LOC_Os09g11000	Chr9	6083800	6084599
Chr10	621800	621999	52	43	78	61	83	1.04549	0.0352456	up		LOC_Os07g38220	Chr7	22921000	22921999
Chr10	6269200	6269799	175	169	251	187	245	0.844807	0.0285001	up		LOC_Os01g41834	Chr1	23688400	23689399
Chr10	6282600	6283799	327	303	457	369	432	0.892622	0.00595395	up		LOC_Os01g41350	Chr1	23397400	23398599
Chr10	6292200	6292599	99	93	138	102	116	0.817403	0.0464309	up		LOC_Os11g30570	Chr11	17794600	17795399
Chr10	6304200	6304799	135	138	183	151	169	0.799231	0.0218018	up		LOC_Os01g72970	Chr1	42325600	42326799
Chr10	631400	633399	437	532	657	467	658	0.716687	0.0415558	up		LOC_Os04g22240	Chr4	12597800	12598199
Chr10	6574200	6574799	121	165	201	156	218	0.835206	0.0172944	up		LOC_Os10g09090	Chr10	4915600	4915999
Chr10	6607200	6608599	340	305	437	340	458	0.764877	0.0426058	up		LOC_Os06g30870	Chr6	17926800	17927599
Chr10	6711400	6712599	279	318	418	292	384	0.74804	0.0100188	up		LOC_Os03g42920	Chr3	23938600	23938999
Chr10	6729800	6730399	139	143	198	152	198	0.81391	0.0259622	up		LOC_Os05g10800	Chr5	5965000	5965599
Chr10	6755200	6755599	104	66	180	126	114	1.31883	0.0140697	up		LOC_Os02g55070	Chr2	33729400	33729799
Chr10	6927200	6928199	412	448	202	131	166	-0.879595	0.01159	down		LOC_Os12g44020	Chr12	27306400	27306999
Chr10	6958000	6958399	99	102	140	118	127	0.870599	0.024815	up		LOC_Os01g57680	Chr1	33347800	33348199
Chr10	6965200	6965799	90	92	179	120	209	1.20736	0.000210959	up		LOC_Os03g50490	Chr3	28822600	28822999
Chr10	7228000	7228399	119	112	155	131	157	0.815045	0.0324145	up		LOC_Os04g30680	Chr4	18338400	18339199
Chr10	7266400	7267799	377	302	489	374	470	0.834561	0.0343321	up		LOC_Os09g33940	Chr9	20031600	20032399
Chr10	7385800	7386399	124	144	198	163	229	0.94326	0.00340235	up		LOC_Os03g63600	Chr3	35916200	35916999
Chr10	7456600	7457199	153	139	221	157	141	0.862285	0.0152233	up		LOC_Os05g12481	Chr5	7169200	7169599
Chr10	7502800	7503599	224	170	323	232	294	0.974884	0.0157229	up		LOC_Os01g06980	Chr1	3294800	3295199
Chr10	7548000	7548599	154	123	216	157	178	0.914404	0.0340606	up		LOC_Os04g07970	Chr4	4243000	4244399
Chr10	7582400	7582799	162	152	226	155	142	0.766771	0.0418437	up		LOC_Os09g23170	Chr9	13712600	13713399
Chr10	7757400	7757999	201	196	332	221	200	0.96359	0.0119109	up		LOC_Os01g15320	Chr1	8577400	8577999
Chr10	7851800	7852199	206	183	66	37	73	-1.4469	0.00134725	down		LOC_Os08g16260	Chr8	9921400	9922999
Chr10	8111200	8111599	74	48	107	81	58	1.10712	0.0211931	up		LOC_Os12g25280	Chr12	14540800	14541599
Chr10	8113800	8114199	160	180	209	201	217	0.79734	0.0320836	up		LOC_Os03g27440	Chr3	15745200	15745999
Chr10	8120000	8120599	281	196	395	267	206	0.941897	0.0432903	up		LOC_Os10g09090	Chr10	4916400	4917199
Chr10	8126400	8127199	287	221	380	300	265	0.910915	0.0265119	up		LOC_Os04g30430	Chr4	18175800	18176799
Chr10	8160200	8160599	68	90	113	105	121	0.992068	0.0106589	up		LOC_Os03g27940	Chr3	16049000	16049599
Chr10	8185800	8186999	254	336	416	323	339	0.840114	0.00684455	up		LOC_Os12g02330	Chr12	746000	746599
Chr10	8188800	8189999	216	256	401	305	362	1.08878	0.000109405	up		LOC_Os02g21500	Chr2	12751400	12752199
Chr10	8203200	8203799	105	139	215	169	182	1.16961	0.000584044	up		LOC_Os04g14220	Chr4	7981400	7982599
Chr10	8367200	8367799	223	251	81	57	70	-1.28122	0.000299954	down		LOC_Os04g06790	Chr4	3581800	3582399
Chr10	8784200	8785199	228	196	282	243	285	0.812888	0.034437	up		LOC_Os04g06800	Chr4	3581800	3582399
Chr10	8867000	8867599	177	224	242	208	229	0.688171	0.0451163	up		LOC_Os08g44180	Chr8	27810200	27811599
Chr10	89600	90599	359	398	181	112	170	-0.882001	0.00496778	down		LOC_Os05g44970	Chr5	26144200	26144999
Chr10	9104200	9104999	148	135	262	206	313	1.22499	0.000261691	up		LOC_Os07g37910	Chr7	22748400	22748999
Chr10	9290800	9291399	157	156	220	175	218	0.839626	0.0128657	up		LOC_Os09g16650	Chr9	10204200	10204799
Chr10	9693800	9694799	170	172	277	233	272	1.08673	0.000754656	up		LOC_Os06g48980	Chr6	29677800	29678199
Chr10	9767800	9768799	361	395	175	127	175	-0.824178	0.006623	down		LOC_Os01g06670	Chr1	3145800	3146799
Chr10	9788400	9788999	125	121	204	165	208	1.08958	0.0012011	up		LOC_Os09g10270	Chr9	5594800	5595399
Chr10	9795400	9796799	408	425	525	399	572	0.651057	0.0365484	up		LOC_Os08g07340	Chr8	4111800	4112399
Chr10	980400	981199	180	183	289	206	243	0.942288	0.00323705	up		LOC_Os09g18620	Chr9	11411600	11412399
Chr10	9859800	9860799	223	261	334	244	335	0.759492	0.0155886	up		LOC_Os02g15310	Chr2	8558800	8559199
Chr10	987600	988599	238	260	346	259	318	0.783318	0.0077687	up		LOC_Os12g02340	Chr12	760800	761399
Chr10	9938400	9938799	104	90	137	127	95	0.956366	0.0201105	up		LOC_Os03g24690	Chr3	14070800	14071799
Chr11	10051800	10052599	207	203	281	252	322	0.893327	0.00981948	up		LOC_Os07g34560	Chr7	20720400	20721199
Chr11	10161800	10163399	405	479	603	452	559	0.761704	0.035641	up		LOC_Os12g43310	Chr12	26880000	26880399
Chr11	10173000	10173599	206	229	273	213	234	0.666995	0.0372885	up		LOC_Os08g12410	Chr8	7325200	7325999
Chr11	10253600	10254799	239	261	362	284	365	0.876552	0.00218812	up		LOC_Os06g19670	Chr6	11232000	11232399
Chr11	10312800	10314399	308	369	464	359	515	0.791862	0.00626709	up		LOC_Os05g48210	Chr5	27638000	27638599
Chr11	1032600	1033799	243	271	423	301	332	0.992865	0.000345039	up		LOC_Os09g27830	Chr9	16930800	16931399
Chr11	10328600	10329999	281	319	450	353	369	0.929338	0.00107265	up		LOC_Os04g10760	Chr4	5850200	5851399
Chr11	10338400	10338799	110	116	155	128	104	0.833977	0.018957	up		LOC_Os09g39170	Chr9	22491600	22492799
Chr11	10345600	10346199	147	182	209	186	187	0.787466	0.0233601	up		LOC_Os06g24460	Chr6	14332200	14332999
Chr11	10394600	10395399	192	152	291	221	277	1.06199	0.0119109	up		LOC_Os02g56740	Chr2	34791000	34791599
Chr11	10416600	10418199	325	339	434	331	469	0.70623	0.0289044	up		LOC_Os09g10054	Chr9	5471800	5472399
Chr11	10443800	10444199	140	145	193	138	123	0.71238	0.0426928	up		LOC_Os08g01320	Chr8	203200	203599
Chr11	10524000	10525599	411	432	553	401	459	0.675644	0.0398938	up		LOC_Os04g37619	Chr4	22369400	22369999
Chr11	10558600	10559799	293	363	478	359	355	0.860501	0.00703011	up		LOC_Os11g25080	Chr11	14299600	14300199
Chr11	10582000	10583199	281	307	365	349	420	0.807342	0.0377353	up		LOC_Os08g18150	Chr8	11130200	11130599
Chr11	10688200	10688999	163	140	214	186	225	0.906325	0.0189602	up		LOC_Os12g31200	Chr12	18783800	18784399
Chr11	1076200	1077199	262	295	355	281	361	0.700504	0.0221754	up		LOC_Os12g30170	Chr12	18112400	18113399
Chr11	10845200	10845599	93	77	143	106	97	1.04071	0.0188716	up		LOC_Os06g16150	Chr6	9196400	9196799
Chr11	10908600	10909799	300	316	391	288	400	0.639582	0.048911	up		LOC_Os01g18340	Chr1	10303400	10304599
Chr11	11012000	11012599	238	257	66	46	78	-1.64685	3.04943e-08	down		LOC_Os05g32860	Chr5	19240600	19240999
Chr11	11082200	11082999	186	199	319	216	256	0.967017	0.00165521	up		LOC_Os06g21760	Chr6	12573600	12574199
Chr11	11159600	11159999	115	88	164	121	112	0.975125	0.0272565	up		LOC_Os11g07660	Chr11	3912800	3913399
Chr11	11196400	11196999	160	194	246	184	182	0.787884	0.0413859	up		LOC_Os04g53520	Chr4	31891200	31891799
Chr11	11211000	11211399	91	108	131	116	132	0.831454	0.0259908	up		LOC_Os11g23210	Chr11	13362400	13363399
Chr11	11379200	11379799	184	131	257	175	216	0.928317	0.0381079	up		LOC_Os04g45030	Chr4	26642800	26643799
Chr11	11481000	11482599	415	516	575	436	530	0.629137	0.049164	up		LOC_Os04g45040	Chr4	26642800	26643799
Chr11	11512000	11513599	345	391	521	405	519	0.839331	0.00768779	up		LOC_Os06g12190	Chr6	6534600	6535399
Chr11	11515800	11516799	248	184	327	253	297	0.911488	0.0357216	up		LOC_Os10g07050	Chr10	3701600	3702399
Chr11	11539200	11540799	365	381	472	363	509	0.665369	0.0437842	up		LOC_Os06g29670	Chr6	17020400	17021199
Chr11	11569600	11570799	307	306	407	314	406	0.734981	0.0265039	up		LOC_Os04g51040	Chr4	30218200	30218799
Chr11	11680800	11681399	192	166	276	203	201	0.90972	0.0200666	up		LOC_Os08g07720	Chr8	4318200	4318599
Chr11	11878600	11878999	91	63	174	120	96	1.40764	0.00294354	up		LOC_Os07g13719	Chr7	7875200	7875799
Chr11	12164200	12164999	817	637	4418	3480	563	2.9312	6.01086e-24	up		LOC_Os10g22600	Chr10	11732000	11732999
Chr11	12575000	12576799	545	711	325	239	308	-0.64541	0.0371458	down		LOC_Os01g46680	Chr1	26581200	26581599
Chr11	12593000	12594199	324	277	433	316	434	0.805089	0.0304697	up		LOC_Os06g17850	Chr6	10361800	10362199
Chr11	12741000	12741799	363	302	164	97	115	-0.88206	0.0352626	down		LOC_Os03g15100	Chr3	8248600	8249599
Chr11	12772600	12773999	302	292	405	308	397	0.761253	0.0426205	up		LOC_Os03g01210	Chr3	135200	135599
Chr11	12780000	12780399	97	82	132	108	130	0.922752	0.0399988	up		LOC_Os03g06980	Chr3	3564800	3565199
Chr11	12907200	12908199	254	269	373	283	365	0.829117	0.018538	up		LOC_Os02g48910	Chr2	29919600	29920399
Chr11	13003800	13005199	387	436	482	438	421	0.68423	0.0393856	up		LOC_Os12g28720	Chr12	16970600	16971199
Chr11	13058600	13058999	85	89	137	102	128	0.958788	0.0084035	up		LOC_Os03g15033	Chr3	8211400	8211999
Chr11	13147600	13148399	165	129	233	180	231	0.980433	0.0137975	up		LOC_Os03g15040	Chr3	8211400	8211999
Chr11	13285400	13286199	303	328	162	113	129	-0.702084	0.0311044	down		LOC_Os06g34250	Chr6	19939200	19939999
Chr11	13362400	13363399	230	225	373	276	375	1.00848	0.00163414	up		LOC_Os12g37939	Chr12	23315000	23315399
Chr11	1345000	1346199	195	285	340	252	342	0.81804	0.0231753	up		LOC_Os06g17960	Chr6	10442800	10443199
Chr11	13521400	13521999	149	137	198	155	231	0.8025	0.0466395	up		LOC_Os07g35060	Chr7	21001800	21002399
Chr11	13542400	13543799	306	405	456	339	408	0.672197	0.0286869	up		LOC_Os12g11840	Chr12	6429400	6429799
Chr11	13603200	13603599	337	198	79	72	70	-1.33711	0.0135287	down		LOC_Os01g46210	Chr1	26286400	26287399
Chr11	13678800	13679399	136	149	210	152	195	0.844887	0.0129281	up		LOC_Os11g05280	Chr11	2339600	2340399
Chr11	13708400	13709799	347	377	509	360	506	0.759894	0.0137414	up		LOC_Os03g05530	Chr3	2752600	2753199
Chr11	13766600	13767199	357	295	93	84	86	-1.37775	0.000403213	down		LOC_Os01g47550	Chr1	27185600	27185999
Chr11	14026400	14026999	182	114	271	175	163	1.05175	0.0399057	up		LOC_Os03g36770	Chr3	20399800	20400999
Chr11	14057200	14057999	218	212	287	231	304	0.772522	0.0238653	up		LOC_Os11g02964	Chr11	1032600	1033799
Chr11	14074600	14075399	350	371	180	133	105	-0.704266	0.0269719	down		LOC_Os12g42200	Chr12	26172800	26173599
Chr11	14090600	14090999	110	111	167	124	123	0.895922	0.0103535	up		LOC_Os12g32150	Chr12	19392400	19393399
Chr11	14116400	14117199	211	207	277	216	264	0.739435	0.0285148	up		LOC_Os05g44940	Chr5	26123800	26124799
Chr11	14152000	14152399	79	127	149	115	123	0.878968	0.0267371	up		LOC_Os01g09580	Chr1	4913200	4913799
Chr11	14294800	14295599	213	197	273	231	201	0.804154	0.0347573	up		LOC_Os06g50110	Chr6	30353000	30353399
Chr11	14299600	14300199	117	155	221	164	197	1.01119	0.00132594	up		LOC_Os11g07500	Chr11	3807400	3808399
Chr11	14316800	14317399	142	164	216	148	201	0.747605	0.0399988	up		LOC_Os08g09450	Chr8	5477200	5478999
Chr11	14342600	14343799	269	295	388	292	360	0.772982	0.0189403	up		LOC_Os01g49080	Chr1	28208200	28208999
Chr11	14421800	14422399	141	103	218	151	163	1.07358	0.0109471	up		LOC_Os02g25630	Chr2	14984000	14984799
Chr11	14557000	14557799	293	341	162	120	128	-0.664456	0.0395513	down		LOC_Os01g35110	Chr1	19437000	19437399
Chr11	14635800	14636399	148	140	188	176	241	0.854856	0.0368172	up		LOC_Os02g17780	Chr2	10282800	10283799
Chr11	1472000	1472399	85	115	140	114	165	0.862884	0.0205222	up		LOC_Os10g20990	Chr10	10630000	10630799
Chr11	14828800	14828999	56	43	96	73	70	1.26388	0.00292435	up		LOC_Os01g45274	Chr1	25696000	25697199
Chr11	15025600	15026199	137	119	231	144	213	1.02657	0.00579071	up		LOC_Os12g04750	Chr12	2022400	2022799
Chr11	15133200	15134199	265	281	452	313	351	0.980031	0.000817492	up		LOC_Os08g29809	Chr8	18329400	18329999
Chr11	15183200	15183599	75	65	120	88	110	1.06257	0.0241439	up		LOC_Os01g54100	Chr1	31115400	31115999
Chr11	15313400	15314199	177	220	281	191	263	0.749225	0.0278901	up		LOC_Os04g55400	Chr4	32952000	32953599
Chr11	15327800	15328799	202	254	337	234	295	0.826418	0.0155074	up		LOC_Os08g19600	Chr8	11716400	11717599
Chr11	15342800	15343999	256	290	404	306	386	0.884304	0.0122982	up		LOC_Os06g37080	Chr6	21893200	21893599
Chr11	15372000	15373199	297	313	474	383	340	0.99882	0.00102521	up		LOC_Os03g61510	Chr3	34891400	34892399
Chr11	15418600	15419199	182	161	240	187	207	0.812358	0.04535	up		LOC_Os07g23910	Chr7	13516800	13517399
Chr11	15459600	15459799	38	37	100	71	85	1.68508	9.10594e-06	up		LOC_Os01g07040	Chr1	3314800	3315599
Chr11	15486000	15486599	118	99	211	146	168	1.20261	0.000746094	up		LOC_Os04g54860	Chr4	32632000	32633799
Chr11	15512000	15512799	257	263	337	277	263	0.748047	0.0241485	up		LOC_Os09g02580	Chr9	1075000	1075599
Chr11	15588200	15589799	399	343	528	384	535	0.784537	0.0473473	up		LOC_Os04g53050	Chr4	31599800	31600399
Chr11	15634600	15634999	115	99	184	125	127	1.0137	0.0107258	up		LOC_Os05g48620	Chr5	27876800	27877599
Chr11	15648400	15650399	446	437	578	510	610	0.814982	0.0331472	up		LOC_Os11g09478	Chr11	5092200	5093199
Chr11	15665600	15666999	275	355	409	312	370	0.706899	0.0203055	up		LOC_Os01g08050	Chr1	3901000	3901999
Chr11	15669400	15670599	329	331	503	346	406	0.853128	0.00967471	up		LOC_Os05g42290	Chr5	24737000	24737399
Chr11	15697000	15698599	369	441	478	411	424	0.654919	0.0387763	up		LOC_Os08g07660	Chr8	4290200	4290999
Chr11	15708400	15708999	121	132	188	146	184	0.906555	0.00873946	up		LOC_Os05g37410	Chr5	21895800	21896799
Chr11	15724800	15725399	169	181	240	179	209	0.760973	0.0244	up		LOC_Os10g04860	Chr10	2367600	2368399
Chr11	15743800	15744999	432	501	215	118	167	-1.00826	0.00300255	down		LOC_Os07g06710	Chr7	3275200	3275799
Chr11	15862200	15862999	227	195	309	253	251	0.913046	0.0121729	up		LOC_Os01g59560	Chr1	34438000	34438799
Chr11	15904200	15905199	273	299	378	329	256	0.823023	0.0097264	up		LOC_Os08g42820	Chr8	27077800	27078399
Chr11	15910400	15911199	226	238	326	209	219	0.6919	0.0372234	up		LOC_Os03g15290	Chr3	8367800	8368999
Chr11	16358000	16358599	129	129	195	181	175	1.06214	0.00362337	up		LOC_Os06g20130	Chr6	11545000	11546999
Chr11	16394800	16395399	151	108	239	203	125	1.26625	0.0038423	up		LOC_Os07g02720	Chr7	991600	992799
Chr11	16443000	16443799	190	193	288	212	238	0.882359	0.00513945	up		LOC_Os05g27240	Chr5	15841400	15841799
Chr11	16453800	16454199	97	130	151	128	169	0.819729	0.0392159	up		LOC_Os12g05190	Chr12	2300400	2301799
Chr11	16481000	16482199	276	275	375	293	355	0.779919	0.0234049	up		LOC_Os10g08710	Chr10	4725400	4726199
Chr11	16493600	16493999	141	139	193	146	98	0.775098	0.0259773	up		LOC_Os09g19170	Chr9	11459400	11461399
Chr11	16498200	16498799	131	155	228	149	176	0.89203	0.0308961	up		LOC_Os02g17660	Chr2	10165800	10166599
Chr11	16609200	16610599	378	444	539	387	313	0.673765	0.0207192	up		LOC_Os10g13810	Chr10	7502800	7503599
Chr11	16633200	16634199	196	206	349	252	210	1.07772	8.70559e-05	up		LOC_Os01g57082	Chr1	32985000	32985399
Chr11	16774600	16775599	247	180	331	245	234	0.913024	0.033409	up		LOC_Os01g73770	Chr1	42727200	42728199
Chr11	16782400	16783199	163	167	225	176	242	0.784821	0.032682	up		LOC_Os11g41950	Chr11	25230400	25232599
Chr11	16806200	16808999	584	610	852	603	851	0.779322	0.0159361	up		LOC_Os11g41960	Chr11	25230400	25232599
Chr11	1688600	1690399	446	528	610	455	618	0.634898	0.0277931	up		LOC_Os03g49410	Chr3	28125600	28126199
Chr11	16944000	16944999	283	318	357	302	370	0.648471	0.0475806	up		LOC_Os07g03140	Chr7	1202600	1202999
Chr11	16954200	16955199	461	442	198	136	142	-0.947231	0.00616088	down		LOC_Os08g33730	Chr8	21062600	21063199
Chr11	17106600	17107199	129	185	233	161	225	0.834723	0.0159527	up		LOC_Os07g03025	Chr7	1141200	1141999
Chr11	17244800	17245399	136	116	259	152	227	1.17303	0.00718777	up		LOC_Os02g14800	Chr2	8213200	8213799
Chr11	17273400	17274199	190	217	277	214	265	0.778085	0.0110001	up		LOC_Os10g07556	Chr10	4080800	4081799
Chr11	17510200	17511199	201	193	285	224	194	0.870655	0.0091789	up		LOC_Os09g21070	Chr9	12702400	12702999
Chr11	17565400	17566599	319	293	427	340	386	0.82561	0.019456	up		LOC_Os12g01350	Chr12	204200	204999
Chr11	17582800	17583799	230	230	331	240	245	0.807293	0.0104279	up		LOC_Os08g41080	Chr8	25969400	25969799
Chr11	17614800	17615399	138	150	221	170	209	0.945999	0.0091789	up		LOC_Os12g04010	Chr12	1669400	1670199
Chr11	17616000	17617999	343	442	741	493	580	1.15126	1.86284e-05	up		LOC_Os01g16370	Chr1	9293200	9293599
Chr11	17641000	17641599	117	119	207	139	111	1.04253	0.00135035	up		LOC_Os01g06882	Chr1	3258000	3258599
Chr11	17665200	17665999	182	170	280	188	270	0.896266	0.00934087	up		LOC_Os09g09220	Chr9	4935600	4936199
Chr11	17669200	17669599	106	76	180	118	204	1.18362	0.00583931	up		LOC_Os08g34800	Chr8	21883800	21884799
Chr11	17794600	17795399	162	195	279	232	303	1.03489	0.00688212	up		LOC_Os10g14800	Chr10	7757400	7757999
Chr11	1780400	1781799	325	380	431	341	379	0.64204	0.0350709	up		LOC_Os03g13840	Chr3	7502600	7504399
Chr11	17878800	17879199	119	124	163	128	121	0.764838	0.0350511	up		LOC_Os10g33240	Chr10	17437200	17437799
Chr11	18331000	18333199	430	426	685	530	663	1.00609	0.000340024	up		LOC_Os01g09350	Chr1	4758200	4759599
Chr11	18333600	18335399	347	410	617	458	577	1.01147	0.000803808	up		LOC_Os11g09418	Chr11	5059000	5059599
Chr11	1833800	1834799	311	367	162	113	152	-0.801538	0.00952139	down		LOC_Os04g52420	Chr4	31154200	31154799
Chr11	18380000	18381399	298	357	405	313	386	0.642414	0.0373136	up		LOC_Os12g06410	Chr12	3068800	3069799
Chr11	1842800	1843399	108	115	181	143	228	1.04535	0.00120216	up		LOC_Os05g48730	Chr5	27928400	27929199
Chr11	18442000	18442599	112	142	199	165	197	1.03764	0.00434422	up		LOC_Os01g60050	Chr1	34734600	34734999
Chr11	18474000	18474599	176	182	256	209	181	0.885443	0.00987461	up		LOC_Os07g23470	Chr7	13256800	13257399
Chr11	18490000	18490999	174	246	297	235	293	0.860643	0.00869336	up		LOC_Os09g08990	Chr9	4775800	4776399
Chr11	1853400	1854799	335	342	482	378	458	0.84888	0.00536582	up		LOC_Os05g48430	Chr5	27772200	27772599
Chr11	18541600	18542599	212	320	358	269	238	0.755425	0.0313802	up		LOC_Os04g26960	Chr4	15945600	15946599
Chr11	18549000	18549799	182	204	261	208	222	0.790357	0.0119918	up		LOC_Os11g39290	Chr11	23395400	23397599
Chr11	18592400	18593599	209	238	319	240	303	0.827472	0.00452691	up		LOC_Os03g43540	Chr3	24309600	24309999
Chr11	18704000	18704599	137	143	226	156	192	0.941504	0.00737057	up		LOC_Os08g38550	Chr8	24372600	24372999
Chr11	1876400	1877199	237	220	337	254	297	0.866049	0.0252358	up		LOC_Os09g08280	Chr9	4277400	4277799
Chr11	18859400	18859999	323	380	171	128	135	-0.727681	0.0198056	down		LOC_Os01g74590	Chr1	43194000	43195399
Chr11	19005400	19006199	173	212	245	200	171	0.724456	0.0290683	up		LOC_Os02g54470	Chr2	33357600	33359799
Chr11	19015600	19016399	156	153	247	188	210	0.992811	0.00295335	up		LOC_Os01g01730	Chr1	389400	390199
Chr11	19020000	19020799	181	208	297	226	212	0.933417	0.00193614	up		LOC_Os06g20860	Chr6	12051000	12051599
Chr11	19081400	19082199	199	178	291	239	267	0.993582	0.00370424	up		LOC_Os11g48060	Chr11	28972800	28978999
Chr11	19108000	19109399	364	307	470	362	444	0.802321	0.0347893	up		LOC_Os01g26290	Chr1	14900800	14901199
Chr11	19433400	19433799	86	103	182	134	146	1.24656	0.00013702	up		LOC_Os07g13770	Chr7	7900400	7901399
Chr11	19463600	19465199	662	646	314	205	267	-0.850322	0.0103542	down		LOC_Os06g37870	Chr6	22424400	22425999
Chr11	19532000	19532599	213	265	97	76	127	-0.954883	0.00459273	down		LOC_Os09g07900	Chr9	4016000	4016799
Chr11	1955400	1956399	302	435	169	115	130	-0.867873	0.0113414	down		LOC_Os10g10390	Chr10	5710600	5711799
Chr11	19605000	19605599	105	128	190	155	173	1.08081	0.000522932	up		LOC_Os01g23610	Chr1	13272600	13273199
Chr11	19612400	19612799	94	90	146	130	104	1.09809	0.018998	up		LOC_Os04g43910	Chr4	26013000	26013599
Chr11	19683200	19684599	258	329	366	285	341	0.662794	0.0319186	up		LOC_Os04g51020	Chr4	30204800	30205599
Chr11	19694600	19694999	88	114	196	121	98	1.143	0.00130135	up		LOC_Os09g18460	Chr9	11316600	11317199
Chr11	19701600	19702799	214	283	415	311	288	1.05823	0.000103011	up		LOC_Os03g41438	Chr3	23058800	23059399
Chr11	19707600	19708399	120	146	290	180	191	1.311	8.08151e-05	up		LOC_Os12g13910	Chr12	7891600	7893199
Chr11	19717800	19718399	72	92	196	152	168	1.59722	6.44093e-08	up		LOC_Os08g27440	Chr8	16750800	16751399
Chr11	19721800	19722399	190	217	275	206	201	0.745636	0.0289781	up		LOC_Os06g40700	Chr6	24258400	24258999
Chr11	19770600	19771599	192	197	275	236	289	0.906253	0.0102519	up		LOC_Os07g47320	Chr7	28289800	28290599
Chr11	19808200	19808999	145	213	246	175	264	0.745182	0.0452205	up		LOC_Os05g44780	Chr5	26029800	26031399
Chr11	19809600	19810599	161	142	335	273	352	1.50581	1.86635e-05	up		LOC_Os09g03610	Chr9	1790400	1790999
Chr11	19839400	19839999	106	140	210	163	177	1.11453	0.000989871	up		LOC_Os10g01044	Chr10	49200	49599
Chr11	19854000	19854799	179	170	246	171	248	0.746317	0.0367177	up		LOC_Os02g19629	Chr2	11471200	11472199
Chr11	19921600	19922399	190	203	272	201	193	0.767621	0.0260215	up		LOC_Os04g24600	Chr4	14129400	14129999
Chr11	20057400	20060999	817	816	1279	947	1292	0.943179	0.00437447	up		LOC_Os11g45410	Chr11	27492200	27493199
Chr11	20080200	20081199	285	332	469	322	342	0.855464	0.00744176	up		LOC_Os07g30220	Chr7	17853800	17854999
Chr11	20081600	20082799	227	242	333	252	376	0.821185	0.0198064	up		LOC_Os06g17920	Chr6	10405600	10407199
Chr11	20240400	20240999	226	240	114	78	130	-0.784888	0.0235025	down		LOC_Os06g34180	Chr6	19904200	19904599
Chr11	20253000	20253399	113	115	173	131	139	0.91575	0.0155004	up		LOC_Os05g24280	Chr5	14041800	14043199
Chr11	20263400	20264799	364	357	481	381	456	0.760276	0.0362834	up		LOC_Os11g30340	Chr11	17614800	17615399
Chr11	20449400	20450799	262	281	371	294	363	0.799493	0.0132395	up		LOC_Os05g25830	Chr5	15035000	15037999
Chr11	20495600	20495999	202	147	74	50	63	-1.01904	0.0398312	down		LOC_Os08g04270	Chr8	2076000	2077799
Chr11	20620200	20620599	218	172	68	53	73	-1.19948	0.00722454	down		LOC_Os03g60840	Chr3	34567400	34567799
Chr11	20759400	20760799	350	341	532	383	409	0.897959	0.00256254	up		LOC_Os01g18660	Chr1	10509400	10510399
Chr11	20858800	20859199	104	91	160	120	134	1.01562	0.0101068	up		LOC_Os07g15940	Chr7	9261200	9262799
Chr11	20882400	20883599	619	430	168	139	205	-1.28508	0.00587263	down		LOC_Os11g15610	Chr11	8857200	8858999
Chr11	21062800	21063999	269	263	385	313	382	0.897006	0.00431203	up		LOC_Os10g13630	Chr10	7385800	7386399
Chr11	21184200	21184799	168	161	211	176	207	0.740757	0.0436468	up		LOC_Os01g72520	Chr1	42067000	42067799
Chr11	2123800	2124399	148	169	219	167	202	0.790259	0.0157768	up		LOC_Os03g63450	Chr3	35846400	35847399
Chr11	21572200	21572999	302	295	105	76	101	-1.22805	0.000483981	down		LOC_Os05g40340	Chr5	23705000	23705799
Chr11	21660200	21660999	174	214	247	196	249	0.704388	0.0366364	up		LOC_Os08g35130	Chr8	22147600	22147999
Chr11	21666800	21667399	135	129	193	148	191	0.868223	0.0192618	up		LOC_Os01g53255	Chr1	30601000	30601999
Chr11	21675600	21676799	369	425	165	129	166	-0.92521	0.00128935	down		LOC_Os07g29620	Chr7	17413200	17413999
Chr11	21694400	21694799	95	112	141	118	100	0.838565	0.0302378	up		LOC_Os09g08330	Chr9	4305200	4305799
Chr11	21845200	21847799	596	565	876	688	812	0.929695	0.00848084	up		LOC_Os02g39210	Chr2	23682600	23684599
Chr11	21940400	21940999	128	165	231	159	197	0.914865	0.00725113	up		LOC_Os06g19580	Chr6	11153400	11155799
Chr11	21959200	21959999	213	175	274	223	251	0.854097	0.0329845	up		LOC_Os01g42500	Chr1	24166400	24166799
Chr11	22157600	22158799	242	226	394	332	478	1.14021	0.000585593	up		LOC_Os12g16670	Chr12	9547000	9547799
Chr11	22212400	22212999	144	126	195	164	192	0.914489	0.0177405	up		LOC_Os03g05040	Chr3	2456000	2456399
Chr11	22218400	22218799	104	135	175	128	114	0.850119	0.0185873	up		LOC_Os02g09720	Chr2	4997400	4997799
Chr11	22236800	22237399	117	155	195	159	235	0.899803	0.0396358	up		LOC_Os12g09710	Chr12	5125400	5126399
Chr11	22367800	22368599	275	314	117	84	118	-1.05036	0.0133096	down		LOC_Os06g01630	Chr6	374600	374999
Chr11	22659000	22660799	332	409	570	411	586	0.909441	0.00834342	up		LOC_Os06g01640	Chr6	374600	374999
Chr11	22664800	22666599	406	462	583	435	511	0.734066	0.0445913	up		LOC_Os12g12250	Chr12	6726800	6727399
Chr11	22805600	22805999	82	97	160	126	146	1.18609	0.000174265	up		LOC_Os10g04480	Chr10	2121200	2121999
Chr11	22976200	22976799	123	120	211	159	204	1.10526	0.000616987	up		LOC_Os09g36280	Chr9	20938600	20940599
Chr11	22994200	22995199	151	173	307	251	259	1.29746	6.28323e-06	up		LOC_Os01g06940	Chr1	3288200	3288999
Chr11	2318800	2319199	85	54	143	118	149	1.39753	0.00525892	up		LOC_Os06g45090	Chr6	27271600	27272199
Chr11	23228600	23229399	269	318	139	103	128	-0.773172	0.0475243	down		LOC_Os10g04400	Chr10	2080000	2081199
Chr11	23247800	23248399	102	142	214	158	183	1.12027	0.00172719	up		LOC_Os12g27210	Chr12	15965800	15966399
Chr11	23260600	23261199	127	130	168	135	159	0.743519	0.0391153	up		LOC_Os12g09739	Chr12	5146800	5147599
Chr11	23284000	23284599	161	165	232	169	201	0.795789	0.0383502	up		LOC_Os08g44000	Chr8	27699800	27700399
Chr11	23290600	23291599	155	179	298	211	285	1.10768	0.000616856	up		LOC_Os11g02379	Chr11	697000	697399
Chr11	23300000	23300599	128	160	180	173	215	0.825786	0.0457999	up		LOC_Os01g59930	Chr1	34655000	34655599
Chr11	23314400	23315799	370	385	532	429	411	0.855557	0.0188281	up		LOC_Os11g47840	Chr11	28857000	28857399
Chr11	23344200	23344799	116	137	165	157	223	0.875799	0.0263647	up		LOC_Os11g06820	Chr11	3343200	3344799
Chr11	23389800	23390599	228	217	305	244	340	0.805277	0.0265687	up		LOC_Os12g27670	Chr12	16303800	16304799
Chr11	23395400	23397599	410	462	652	536	806	0.959777	0.00234074	up		LOC_Os08g14500	Chr8	8715200	8715999
Chr11	2339600	2340399	261	252	419	307	389	0.995094	0.00680236	up		LOC_Os08g30470	Chr8	18754600	18754799
Chr11	23398600	23399199	145	159	238	171	149	0.927315	0.00251694	up		LOC_Os12g16220	Chr12	9283200	9283599
Chr11	23406400	23407599	282	311	382	294	357	0.694537	0.0247748	up		LOC_Os06g14340	Chr6	7992600	7993399
Chr11	23420400	23421599	300	321	445	294	398	0.740477	0.0146772	up		LOC_Os04g17050	Chr4	9336800	9339199
Chr11	2347400	2348199	189	165	259	209	264	0.901978	0.0158676	up		LOC_Os05g37350	Chr5	21855400	21856199
Chr11	23565000	23565799	171	192	259	211	231	0.884577	0.0164669	up		LOC_Os04g01710	Chr4	472400	472799
Chr11	23607000	23607599	139	185	223	158	196	0.740118	0.0311158	up		LOC_Os12g07680	Chr12	3862200	3862799
Chr11	23686600	23687399	266	318	81	37	78	-1.83538	3.66756e-07	down		LOC_Os05g11090	Chr5	6237400	6237999
Chr11	23695000	23695999	229	231	330	234	324	0.787816	0.013377	up		LOC_Os01g20980	Chr1	11716800	11717999
Chr11	23800600	23801399	165	94	240	161	180	1.09049	0.0447183	up		LOC_Os01g47440	Chr1	27112800	27113799
Chr11	23973000	23974799	504	706	293	215	263	-0.73894	0.0223841	down		LOC_Os08g40420	Chr8	25589400	25590599
Chr11	23982000	23982399	95	106	157	130	129	1.02684	0.0219109	up		LOC_Os08g40430	Chr8	25589400	25590599
Chr11	24126000	24127399	345	331	443	332	474	0.693176	0.0430904	up		LOC_Os11g18320	Chr11	10328600	10329999
Chr11	24156600	24157399	270	351	95	64	60	-1.46258	1.89876e-06	down		LOC_Os12g02180	Chr12	675800	676799
Chr11	24326600	24326999	121	129	187	140	86	0.889129	0.00796717	up		LOC_Os10g11034	Chr10	6106400	6106799
Chr11	2438800	2439999	357	466	152	109	151	-1.14935	4.30315e-05	down		LOC_Os06g22919	Chr6	13375000	13375799
Chr11	24396800	24397599	150	139	304	204	271	1.29849	8.68453e-05	up		LOC_Os06g39380	Chr6	23372200	23372799
Chr11	24403800	24404399	118	159	260	178	182	1.16456	0.000332723	up		LOC_Os06g21820	Chr6	12605800	12606399
Chr11	24441200	24442399	232	356	460	353	314	0.989335	0.00625219	up		LOC_Os11g19740	Chr11	11379200	11379799
Chr11	24469400	24470199	176	187	251	179	179	0.741473	0.0220824	up		LOC_Os04g09620	Chr4	5170200	5170599
Chr11	24472200	24472599	57	90	147	97	91	1.23702	0.000838778	up		LOC_Os04g55920	Chr4	33306400	33306799
Chr11	24507800	24508399	112	124	228	174	146	1.27351	7.96648e-06	up		LOC_Os11g39300	Chr11	23398600	23399199
Chr11	24515400	24515999	126	158	209	158	109	0.879148	0.00656417	up		LOC_Os06g19840	Chr6	11332000	11332599
Chr11	24565000	24565799	191	178	313	260	217	1.14021	0.000623505	up		LOC_Os12g42100	Chr12	26108200	26108799
Chr11	24587200	24587599	110	92	143	134	134	0.967082	0.0237083	up		LOC_Os01g62900	Chr1	36430800	36431399
Chr11	24608200	24608999	166	200	280	244	292	1.03921	0.0010746	up		LOC_Os04g03180	Chr4	1336600	1336999
Chr11	24627000	24628599	363	382	539	431	567	0.887976	0.0190225	up		LOC_Os12g29160	Chr12	17266000	17266599
Chr11	24664200	24665199	234	250	329	237	295	0.723426	0.0494204	up		LOC_Os12g24550	Chr12	14026800	14027599
Chr11	24673000	24674199	179	195	400	305	428	1.41889	1.51767e-06	up		LOC_Os02g38029	Chr2	22977200	22977599
Chr11	24733600	24734399	217	231	314	212	302	0.723106	0.0392053	up		LOC_Os05g35780	Chr5	21233600	21233999
Chr11	24809800	24810799	252	230	394	319	390	1.06643	0.00133708	up		LOC_Os09g13240	Chr9	7636400	7636999
Chr11	24921800	24922799	248	188	393	268	383	1.07459	0.0177925	up		LOC_Os12g40160	Chr12	24857200	24857999
Chr11	24925800	24926999	244	263	345	261	322	0.760207	0.0117442	up		LOC_Os07g06960	Chr7	3427200	3428199
Chr11	2500400	2501199	203	207	300	196	250	0.761264	0.0321116	up		LOC_Os07g35979	Chr7	21522600	21522999
Chr11	25033800	25034599	209	183	326	227	208	0.981411	0.00593194	up		LOC_Os02g07810	Chr2	4088400	4088999
Chr11	25184600	25185199	107	94	224	149	225	1.37526	2.45726e-05	up		LOC_Os06g48030	Chr6	29052400	29052999
Chr11	25230400	25232599	432	460	723	517	463	0.971652	0.000409584	up		LOC_Os04g20810	Chr4	11684200	11684599
Chr11	25276000	25278399	0	0	793	637	0	12.4334	1.35381e-14	up		LOC_Os07g38250	Chr7	22935400	22936799
Chr11	25318000	25320599	0	0	712	581	0	12.2898	2.97968e-14	up		LOC_Os07g22494	Chr7	12653800	12654399
Chr11	25333400	25335599	0	0	713	550	0	12.2499	3.54583e-14	up		LOC_Os04g29110	Chr4	17275800	17277199
Chr11	25344200	25345399	0	0	359	283	0	11.2757	6.49139e-12	up		LOC_Os04g28780	Chr4	17044400	17044999
Chr11	25358400	25359399	29	20	372	282	67	4.23152	1.01577e-29	up		LOC_Os03g18260	Chr3	10233400	10234599
Chr11	25423600	25425599	545	452	716	580	669	0.874408	0.0322028	up		LOC_Os07g08330	Chr7	4263000	4263599
Chr11	25432800	25434599	361	344	557	383	444	0.902061	0.00402078	up		LOC_Os01g38860	Chr1	21805200	21805799
Chr11	25551600	25552199	128	108	210	161	118	1.14598	0.0035951	up		LOC_Os03g06139	Chr3	3083200	3083999
Chr11	25578400	25578999	117	125	275	187	151	1.42576	3.52943e-06	up		LOC_Os10g40680	Chr10	21822800	21823599
Chr11	25626600	25627799	91	84	351	268	137	2.32123	6.2697e-17	up		LOC_Os12g04790	Chr12	2041800	2043199
Chr11	25633000	25634199	222	195	353	313	284	1.18437	0.0108432	up		LOC_Os01g33784	Chr1	18594800	18595599
Chr11	25640200	25641199	0	0	334	235	0	11.0902	1.61475e-11	up		LOC_Os03g37620	Chr3	20862200	20862599
Chr11	25660000	25662199	50	52	608	493	74	3.94263	1.40493e-44	up		LOC_Os06g40370	Chr6	24044400	24044799
Chr11	25669800	25670799	0	0	298	275	0	11.1278	1.61043e-11	up		LOC_Os01g34910	Chr1	19284600	19285399
Chr11	25710800	25711799	0	0	346	257	0	11.1793	1.02323e-11	up		LOC_Os06g02390	Chr6	819600	819999
Chr11	25713200	25713999	0	0	275	197	0	10.8224	6.06633e-11	up		LOC_Os02g42310	Chr2	25448600	25449799
Chr11	25717200	25718199	0	0	284	263	0	11.061	2.26912e-11	up		LOC_Os05g34520	Chr5	20461800	20463199
Chr11	25723800	25724799	0	1	343	254	0	9.72481	3.46488e-09	up		LOC_Os11g37630	Chr11	22212400	22212999
Chr11	25727400	25729399	0	0	671	589	0	12.2603	3.87689e-14	up		LOC_Os01g09310	Chr1	4736800	4737599
Chr11	25732200	25734799	0	0	742	614	0	12.3599	2.06336e-14	up		LOC_Os04g08828	Chr4	4875800	4876599
Chr11	25741400	25742199	0	0	294	185	0	10.831	6.30796e-11	up		LOC_Os04g09420	Chr4	5034200	5034999
Chr11	25745600	25747199	0	0	444	422	0	11.7274	7.92295e-13	up		LOC_Os02g36670	Chr2	22136800	22137399
Chr11	25749600	25750599	0	0	378	262	0	11.2583	7.0045e-12	up		LOC_Os11g27560	Chr11	15862200	15862999
Chr11	25751000	25751999	0	0	383	258	0	11.2577	7.14408e-12	up		LOC_Os11g28990	Chr11	16774600	16775599
Chr11	25757000	25757999	0	0	364	295	0	11.3162	5.42455e-12	up		LOC_Os03g14820	Chr3	8064600	8065399
Chr11	25759000	25759799	0	0	270	206	0	10.8407	5.5742e-11	up		LOC_Os02g35450	Chr2	21311800	21312999
Chr11	26076000	26076599	147	130	197	157	188	0.852742	0.0288314	up		LOC_Os06g47230	Chr6	28641200	28641799
Chr11	26273000	26273799	163	192	241	217	254	0.890728	0.00863499	up		LOC_Os10g30390	Chr10	15799000	15799999
Chr11	26280000	26280399	86	100	168	117	152	1.11503	0.000501544	up		LOC_Os03g48540	Chr3	27668800	27669399
Chr11	26287000	26288399	821	863	1173	959	1131	0.849884	0.00525879	up		LOC_Os02g14020	Chr2	7654800	7655599
Chr11	26289000	26292199	1470	1439	2113	1651	1916	0.872587	0.00489452	up		LOC_Os02g16610	Chr2	9495000	9495599
Chr11	26394600	26395799	313	370	427	351	394	0.703213	0.0194005	up		LOC_Os05g07610	Chr5	4083400	4084399
Chr11	26404600	26405599	365	378	160	128	175	-0.862248	0.0133096	down		LOC_Os02g12380	Chr2	6447000	6447599
Chr11	26503600	26504199	164	184	246	188	222	0.824302	0.0244909	up		LOC_Os12g18090	Chr12	10401800	10402599
Chr11	26507200	26507999	166	171	288	207	261	1.05113	0.000291052	up		LOC_Os04g30260	Chr4	18064000	18064399
Chr11	26575000	26576199	286	237	383	298	421	0.87313	0.0378702	up		LOC_Os11g38250	Chr11	22659000	22660799
Chr11	26598200	26598599	92	88	155	152	163	1.29225	0.000520742	up		LOC_Os11g38260	Chr11	22659000	22660799
Chr11	26772200	26773199	168	205	268	203	298	0.845345	0.0208345	up		LOC_Os02g50000	Chr2	30554800	30556599
Chr11	2677600	2678199	125	114	209	156	219	1.10576	0.00116734	up		LOC_Os09g02860	Chr9	1341200	1341999
Chr11	26787200	26789199	627	744	287	208	263	-0.966302	0.00123243	down		LOC_Os01g31560	Chr1	17260200	17260799
Chr11	26856600	26857399	178	170	229	209	227	0.846881	0.0218074	up		LOC_Os06g01830	Chr6	472600	473199
Chr11	26901800	26902799	308	376	89	79	110	-1.5056	4.85676e-07	down		LOC_Os08g01274	Chr8	182000	182399
Chr11	26994600	26995599	243	231	354	243	310	0.820513	0.0124251	up		LOC_Os01g20980	Chr1	11715400	11716199
Chr11	26997800	26998199	190	118	44	45	51	-1.29088	0.0484675	down		LOC_Os06g43510	Chr6	26155400	26156599
Chr11	27121200	27122399	322	420	115	85	116	-1.3816	2.01035e-06	down		LOC_Os02g53910	Chr2	33008400	33009399
Chr11	27215200	27215799	40	19	210	146	35	3.05758	1.8145e-09	up		LOC_Os06g25500	Chr6	14913000	14913599
Chr11	27226800	27228999	319	218	659	530	247	1.6327	2.91982e-05	up		LOC_Os11g27329	Chr11	15708400	15708999
Chr11	27272800	27273599	102	63	332	275	38	2.36742	7.00214e-10	up		LOC_Os01g61160	Chr1	35402200	35404999
Chr11	27277600	27278799	73	29	331	231	45	2.91445	8.3198e-09	up		LOC_Os12g03040	Chr12	1140400	1140799
Chr11	27284600	27285399	76	50	225	198	27	2.24524	2.78352e-08	up		LOC_Os01g40870	Chr1	23117400	23118199
Chr11	27289200	27290199	78	50	291	232	27	2.51813	2.75652e-11	up		LOC_Os04g18030	Chr4	9955800	9957199
Chr11	27298200	27298999	54	40	221	176	42	2.57403	4.18299e-13	up		LOC_Os01g36690	Chr1	20373400	20373999
Chr11	27311000	27311799	95	65	260	223	51	2.09051	1.44449e-08	up		LOC_Os12g04350	Chr12	1843200	1843999
Chr11	27316200	27316799	88	42	216	156	33	1.97943	0.000102274	up		LOC_Os04g41000	Chr4	24335400	24336199
Chr11	27325400	27326599	100	47	457	325	93	2.8706	3.7423e-10	up		LOC_Os04g41010	Chr4	24335400	24336199
Chr11	27329200	27329999	54	46	258	178	63	2.61225	2.37826e-17	up		LOC_Os04g41490	Chr4	24593200	24593999
Chr11	27366800	27368399	314	245	487	388	421	1.13821	0.00250564	up		LOC_Os12g07600	Chr12	3798800	3799199
Chr11	27394400	27395399	158	103	258	221	234	1.36721	0.00559069	up		LOC_Os04g47570	Chr4	28217600	28218599
Chr11	27412000	27412799	201	219	279	194	171	0.667289	0.0386803	up		LOC_Os05g45450	Chr5	26368000	26368599
Chr11	27429800	27430799	91	104	286	214	154	1.8632	2.43343e-12	up		LOC_Os12g14320	Chr12	8155200	8156199
Chr11	27442200	27442799	41	32	273	184	33	3.13032	1.36798e-21	up		LOC_Os11g46860	Chr11	28121000	28121999
Chr11	27451200	27452799	86	43	521	445	119	3.38651	3.12434e-13	up		LOC_Os06g40080	Chr6	23857400	23858399
Chr11	27464400	27465999	29	19	572	450	34	4.90529	3.11007e-31	up		LOC_Os11g42220	Chr11	25432800	25434599
Chr11	27479600	27479999	40	12	193	139	24	3.11613	0.00369361	up		LOC_Os11g05300	Chr11	2347400	2348199
Chr11	27486800	27487599	110	106	279	268	137	1.86278	1.8159e-07	up		LOC_Os07g09160	Chr7	4777400	4778199
Chr11	27492200	27493199	172	222	296	236	165	0.949183	0.00180439	up		LOC_Os03g29584	Chr3	16866600	16866999
Chr11	27497000	27498199	30	32	384	267	60	3.88808	5.12764e-29	up		LOC_Os07g09530	Chr7	5030200	5030799
Chr11	27499600	27502199	46	70	746	631	69	4.09788	1.03421e-37	up		LOC_Os11g10600	Chr11	5815200	5816199
Chr11	27516000	27517199	26	13	366	299	16	4.5843	2.03363e-27	up		LOC_Os04g55090	Chr4	32758800	32759799
Chr11	27549800	27550399	14	15	214	159	10	4.18858	2.83159e-26	up		LOC_Os09g09520	Chr9	5141400	5142199
Chr11	27554200	27555599	16	19	402	325	25	4.89037	4.78825e-40	up		LOC_Os06g39440	Chr6	23415000	23415399
Chr11	27558600	27559599	11	6	369	237	14	5.63652	2.16556e-32	up		LOC_Os07g48890	Chr7	29254200	29254799
Chr11	27573200	27574199	29	37	284	244	68	3.52155	1.01845e-26	up		LOC_Os06g16730	Chr6	9651400	9651999
Chr11	27607600	27608599	190	121	270	229	251	1.17076	0.0203576	up		LOC_Os09g36660	Chr9	21151600	21151999
Chr11	27664000	27664599	18	12	171	141	24	3.88198	6.09227e-20	up		LOC_Os09g36670	Chr9	21151600	21151999
Chr11	27670800	27671799	114	88	299	250	81	1.94129	4.51971e-09	up		LOC_Os01g42600	Chr1	24229600	24230599
Chr11	27684000	27684799	45	23	217	201	37	3.11803	3.04482e-13	up		LOC_Os07g36250	Chr7	21668000	21668799
Chr11	27689200	27690199	80	51	300	261	43	2.59432	1.34254e-11	up		LOC_Os07g17000	Chr7	10001400	10001999
Chr11	27691200	27691799	69	75	256	207	55	2.19518	3.33694e-15	up		LOC_Os06g03514	Chr6	1353600	1354399
Chr11	27706400	27707199	54	25	304	224	67	3.20957	1.93726e-13	up		LOC_Os01g05260	Chr1	2479600	2480199
Chr11	27715800	27716199	7	6	159	113	9	4.88442	9.79461e-20	up		LOC_Os02g37760	Chr2	22785400	22786199
Chr11	27724400	27724999	25	10	224	197	25	4.07935	4.50422e-16	up		LOC_Os11g30400	Chr11	17665200	17665999
Chr11	27726600	27727199	57	27	274	193	23	2.93904	7.09581e-11	up		LOC_Os04g18590	Chr4	10267600	10268399
Chr11	27759000	27759799	14	5	229	188	16	4.95314	5.83689e-25	up		LOC_Os07g33030	Chr7	19731800	19732599
Chr11	27760200	27761399	29	22	365	321	38	4.26005	9.4871e-30	up		LOC_Os12g31870	Chr12	19195200	19195999
Chr11	27766200	27767599	88	48	529	404	32	3.25245	1.65334e-14	up		LOC_Os03g03654	Chr3	1619600	1620199
Chr11	27769400	27770199	57	40	227	179	28	2.55817	2.66947e-13	up		LOC_Os02g58400	Chr2	35713400	35713799
Chr11	27784800	27785399	24	17	284	172	14	3.94644	4.03227e-21	up		LOC_Os06g19740	Chr6	11288000	11288599
Chr11	27787000	27788199	78	37	332	267	64	2.85577	2.28122e-10	up		LOC_Os06g19750	Chr6	11288000	11288599
Chr11	27793800	27794599	98	78	302	251	192	2.15199	1.39469e-11	up		LOC_Os07g34330	Chr7	20571000	20571799
Chr11	27807000	27807799	72	56	261	201	144	2.34513	2.26034e-13	up		LOC_Os09g28880	Chr9	17550000	17550999
Chr11	27820200	27820999	159	132	346	261	182	1.55156	1.29618e-06	up		LOC_Os03g61710	Chr3	34974400	34975799
Chr11	27843200	27844399	72	58	514	380	81	3.27259	1.4234e-27	up		LOC_Os03g19390	Chr3	10913600	10914199
Chr11	27849800	27850399	8	11	222	149	15	4.78487	2.54518e-26	up		LOC_Os03g19400	Chr3	10913600	10914199
Chr11	27867200	27869799	39	56	810	637	62	4.44638	1.47929e-51	up		LOC_Os04g40180	Chr4	23913400	23913999
Chr11	27879400	27880199	23	19	306	265	12	4.27744	1.11585e-30	up		LOC_Os06g49440	Chr6	29960400	29961799
Chr11	27894200	27895799	16	22	480	390	30	5.03438	1.01483e-43	up		LOC_Os06g49450	Chr6	29960400	29961799
Chr11	27909600	27910399	16	14	261	173	11	4.34362	9.951e-28	up		LOC_Os09g16710	Chr9	10224200	10224799
Chr11	27913600	27914599	17	14	328	256	17	4.73933	1.86051e-34	up		LOC_Os11g17910	Chr11	10051800	10052599
Chr11	27920000	27920599	12	12	235	167	7	4.56457	1.4234e-27	up		LOC_Os10g27330	Chr10	14424000	14424599
Chr11	27922400	27923799	13	13	364	281	29	5.13919	1.28698e-37	up		LOC_Os01g35980	Chr1	19909200	19909799
Chr11	27934400	27935199	12	2	223	176	9	5.27873	1.91815e-05	up		LOC_Os10g11320	Chr10	6282600	6283799
Chr11	27940200	27940799	10	23	194	155	7	3.92831	2.95855e-21	up		LOC_Os06g35410	Chr6	20635600	20636799
Chr11	27946600	27947599	18	15	429	283	16	4.91797	1.47517e-37	up		LOC_Os08g23189	Chr8	13989400	13989999
Chr11	27961800	27962599	6	12	345	210	9	5.43865	4.559e-31	up		LOC_Os10g34602	Chr10	18445200	18446399
Chr11	27983000	27983799	11	5	269	173	8	5.26678	2.11829e-26	up		LOC_Os01g45260	Chr1	25690000	25690599
Chr11	27990400	27991599	14	11	369	274	15	5.18356	3.7808e-36	up		LOC_Os09g11270	Chr9	6260200	6260999
Chr11	27998600	27999599	165	152	268	208	174	1.0845	0.00514884	up		LOC_Os10g37270	Chr10	19961600	19962199
Chr11	28003400	28005799	369	358	784	617	403	1.44813	2.21778e-08	up		LOC_Os10g37280	Chr10	19961600	19962199
Chr11	28010800	28011999	126	173	330	254	207	1.48096	4.67052e-08	up		LOC_Os09g20110	Chr9	12048200	12048799
Chr11	28020600	28021599	19	8	295	215	7	4.72134	1.30034e-25	up		LOC_Os01g32849	Chr1	18029800	18030399
Chr11	28068800	28069599	16	10	329	243	21	4.95338	1.39511e-32	up		LOC_Os01g04730	Chr1	2137600	2138199
Chr11	28075600	28076199	9	7	185	155	18	4.92094	1.65088e-24	up		LOC_Os01g29390	Chr1	16480400	16481199
Chr11	28096200	28096599	13	11	173	128	10	4.14842	1.37523e-22	up		LOC_Os01g29409	Chr1	16480400	16481199
Chr11	28101200	28101999	11	12	267	240	5	4.98508	6.04626e-31	up		LOC_Os11g09474	Chr11	5080000	5080599
Chr11	28116000	28116799	9	8	300	199	8	5.36631	8.80713e-31	up		LOC_Os05g10290	Chr5	5620800	5621399
Chr11	28121000	28121999	265	264	387	310	244	0.90256	0.0028984	up		LOC_Os12g16640	Chr12	9529600	9529999
Chr11	28122400	28122799	92	99	161	103	69	0.955599	0.0166291	up		LOC_Os07g11070	Chr7	6118200	6118799
Chr11	28128000	28129399	443	611	222	154	345	-0.979761	0.00348583	down		LOC_Os06g23100	Chr6	13472400	13473399
Chr11	28159800	28160599	57	33	279	218	71	2.94927	1.92523e-14	up		LOC_Os09g16660	Chr9	10206800	10207799
Chr11	28172000	28172999	47	47	369	295	36	3.32774	2.25849e-26	up		LOC_Os01g01760	Chr1	405200	405599
Chr11	28179000	28179799	7	7	261	202	8	5.55492	4.83831e-29	up		LOC_Os07g15430	Chr7	8926000	8926599
Chr11	28199000	28199799	10	18	246	180	6	4.43786	5.13624e-28	up		LOC_Os03g27590	Chr3	15827800	15829199
Chr11	28220400	28220999	23	17	172	152	16	3.52848	5.74137e-19	up		LOC_Os07g38230	Chr7	22926800	22927199
Chr11	28241800	28243599	82	49	606	479	53	3.53143	1.38248e-15	up		LOC_Os11g31610	Chr11	18474000	18474599
Chr11	28258600	28259199	13	14	194	136	19	4.10968	3.0419e-23	up		LOC_Os01g15640	Chr1	8796800	8797599
Chr11	28274400	28274999	12	19	218	192	6	4.25274	2.98211e-25	up		LOC_Os09g20190	Chr9	12100600	12101399
Chr11	28282800	28283199	13	7	148	110	3	4.1832	2.21093e-19	up		LOC_Os11g39550	Chr11	23565000	23565799
Chr11	28292800	28293399	14	6	207	151	6	4.64894	2.66967e-22	up		LOC_Os06g48500	Chr6	29342000	29343199
Chr11	28294800	28295799	18	18	315	274	14	4.54979	3.31833e-32	up		LOC_Os11g26790	Chr11	15342800	15343999
Chr11	28307400	28309599	27	25	760	538	46	5.13587	1.47929e-51	up		LOC_Os05g13300	Chr5	7374800	7375799
Chr11	28314200	28314799	6	11	203	143	4	4.85219	5.3058e-25	up		LOC_Os07g19570	Chr7	11597400	11598599
Chr11	28348400	28350199	93	57	471	418	49	3.063	4.3036e-16	up		LOC_Os05g41810	Chr5	24488600	24488999
Chr11	28361600	28362399	102	100	251	198	164	1.65588	1.31892e-08	up		LOC_Os01g66860	Chr1	38818600	38819399
Chr11	28365800	28366199	12	10	144	101	29	3.97202	7.88085e-19	up		LOC_Os01g40110	Chr1	22627600	22628199
Chr11	28376200	28377599	68	55	363	307	68	2.9495	1.29518e-18	up		LOC_Os11g28530	Chr11	16443000	16443799
Chr11	28410800	28411199	10	7	116	98	5	4.1636	1.78253e-17	up		LOC_Os10g04342	Chr10	2054400	2055199
Chr11	28421200	28422399	21	11	331	258	9	4.69479	1.89423e-29	up		LOC_Os01g49920	Chr1	28669600	28669999
Chr11	28426200	28426999	14	18	292	224	9	4.52097	2.16556e-32	up		LOC_Os08g34280	Chr8	21512600	21513799
Chr11	28442000	28443399	16	9	445	329	30	5.44353	7.19563e-36	up		LOC_Os08g05520	Chr8	2949000	2949599
Chr11	28483200	28484199	113	74	301	224	127	1.96881	1.2873e-07	up		LOC_Os01g32184	Chr1	17614200	17614999
Chr11	28484600	28485599	172	120	346	255	238	1.52086	0.00012226	up		LOC_Os12g32700	Chr12	19749000	19749799
Chr11	28509000	28510799	152	94	663	541	111	2.77577	4.3015e-13	up		LOC_Os01g11270	Chr1	6030600	6032799
Chr11	28565600	28566199	100	42	201	150	107	1.76466	0.00293661	up		LOC_Os05g12230	Chr5	7000600	7001199
Chr11	28574000	28574599	96	25	324	239	69	2.6527	0.0212081	up		LOC_Os03g46390	Chr3	26237800	26239599
Chr11	28579800	28580799	198	100	355	262	69	1.51284	0.00538151	up		LOC_Os03g46400	Chr3	26237800	26239599
Chr11	28615000	28616799	287	117	725	517	168	2.06814	0.000367627	up		LOC_Os10g21110	Chr10	10730400	10730799
Chr11	28620600	28621199	57	35	167	154	27	2.30429	4.8749e-08	up		LOC_Os12g18900	Chr12	10973800	10974399
Chr11	28652600	28653399	55	31	277	228	39	3.04256	4.2724e-15	up		LOC_Os04g14304	Chr4	8009000	8009799
Chr11	28662800	28664399	137	80	537	484	81	2.72709	1.89024e-11	up		LOC_Os08g03860	Chr8	1840400	1841199
Chr11	28669600	28671999	189	122	825	662	123	2.74188	1.13096e-14	up		LOC_Os09g03090	Chr9	1470000	1470599
Chr11	28672400	28675199	225	117	1025	748	120	2.83668	9.99418e-11	up		LOC_Os10g05900	Chr10	2978000	2978599
Chr11	28686400	28686799	17	10	154	114	19	3.8032	2.25733e-18	up		LOC_Os07g31370	Chr7	18581800	18582599
Chr11	28694200	28695199	72	25	283	242	28	2.89942	0.0018802	up		LOC_Os08g24350	Chr8	14698400	14698999
Chr11	28706400	28706799	60	25	150	112	12	2.08786	0.000129471	up		LOC_Os11g18194	Chr11	10253600	10254799
Chr11	28713200	28713599	36	9	124	101	19	2.77202	0.0130911	up		LOC_Os12g10710	Chr12	5747200	5747999
Chr11	28720000	28721199	77	38	457	350	40	3.28259	1.67027e-14	up		LOC_Os11g39200	Chr11	23344200	23344799
Chr11	28723000	28724399	183	116	587	376	114	2.14675	9.18293e-08	up		LOC_Os09g25080	Chr9	15003600	15004399
Chr11	28727800	28729199	203	121	536	416	144	2.03141	7.43238e-07	up		LOC_Os01g52700	Chr1	30305200	30305999
Chr11	28730000	28730999	105	68	298	237	123	2.11462	3.52844e-08	up		LOC_Os03g56160	Chr3	32008000	32009599
Chr11	28736000	28736799	126	112	315	209	176	1.62066	3.96798e-07	up		LOC_Os03g36500	Chr3	20216200	20216799
Chr11	28759200	28759999	52	37	261	199	137	2.86043	1.08749e-16	up		LOC_Os07g26600	Chr7	15323000	15323799
Chr11	2876800	2877399	101	157	216	157	228	1.04682	0.00284182	up		LOC_Os04g28810	Chr4	17060200	17061199
Chr11	28774400	28775399	165	209	288	254	269	1.06031	0.000856019	up		LOC_Os05g37470	Chr5	21930000	21930599
Chr11	28778000	28778799	83	89	251	203	48	1.90984	5.65496e-12	up		LOC_Os11g42200	Chr11	25423600	25425599
Chr11	28781400	28782199	40	36	241	203	45	3.05579	7.87802e-21	up		LOC_Os04g23820	Chr4	13606600	13607399
Chr11	28785200	28785799	92	93	185	151	159	1.36849	7.06272e-06	up		LOC_Os04g33830	Chr4	20495800	20496799
Chr11	28800600	28801799	107	58	390	338	94	2.62792	5.22701e-10	up		LOC_Os01g04130	Chr1	1817000	1818999
Chr11	28839000	28841199	499	493	651	461	489	0.656338	0.0346862	up		LOC_Os07g19330	Chr7	11438000	11438999
Chr11	28841600	28842999	298	308	537	388	447	1.10631	0.000144642	up		LOC_Os02g37880	Chr2	22892200	22892999
Chr11	28857000	28857399	113	82	151	115	163	0.933986	0.0475149	up		LOC_Os01g11260	Chr1	6024800	6025599
Chr11	28860800	28861199	35	4	162	117	31	3.25276	0.0429215	up		LOC_Os01g13140	Chr1	7308000	7310799
Chr11	28871000	28871999	178	206	300	291	374	1.15282	0.000459041	up		LOC_Os08g09360	Chr8	5432600	5434599
Chr11	28882000	28882399	46	13	121	103	34	2.38087	0.0477113	up		LOC_Os01g58770	Chr1	33968200	33968999
Chr11	28931200	28931599	51	35	145	117	21	2.09972	1.96711e-06	up		LOC_Os01g58780	Chr1	33968200	33968999
Chr11	28932200	28932799	88	81	214	162	95	1.651	2.30225e-07	up		LOC_Os04g28420	Chr4	16817600	16817999
Chr11	28938000	28938799	143	150	267	202	293	1.18049	0.000633721	up		LOC_Os10g01540	Chr10	350200	351199
Chr11	28970200	28971799	545	602	810	590	392	0.787711	0.00246348	up		LOC_Os08g34980	Chr8	22029600	22029999
Chr11	28972800	28978999	1711	1731	2701	2031	1978	0.95771	0.000175997	up		LOC_Os04g08470	Chr4	4570400	4571799
Chr11	28981200	28981999	225	212	315	241	279	0.845119	0.0105105	up		LOC_Os09g16170	Chr9	9861200	9861999
Chr11	2977200	2977799	110	122	245	192	146	1.42123	4.48293e-06	up		LOC_Os02g47400	Chr2	28939000	28939399
Chr11	3036200	3037999	384	403	520	402	579	0.731973	0.0262767	up		LOC_Os07g37300	Chr7	22345200	22345799
Chr11	3105200	3105799	112	160	185	150	146	0.821929	0.0292143	up		LOC_Os01g52230	Chr1	30025600	30026799
Chr11	3117400	3118399	173	280	323	247	309	0.855284	0.0388317	up		LOC_Os02g37180	Chr2	22474800	22475399
Chr11	3127600	3128999	240	341	356	335	342	0.78863	0.034937	up		LOC_Os02g19140	Chr2	11160000	11161399
Chr11	3137800	3138599	164	202	290	206	246	0.941623	0.00325029	up		LOC_Os11g36690	Chr11	21666800	21667399
Chr11	3157400	3158399	249	226	352	255	304	0.843814	0.0271073	up		LOC_Os09g37580	Chr9	21655800	21657399
Chr11	3238200	3238799	160	160	271	223	318	1.13408	0.000280155	up		LOC_Os02g42620	Chr2	25639200	25640399
Chr11	3343200	3344799	344	357	506	432	653	0.933345	0.00333294	up		LOC_Os09g09920	Chr9	5391400	5392399
Chr11	3458400	3459199	165	162	317	219	231	1.20333	5.40086e-05	up		LOC_Os06g13590	Chr6	7519600	7520399
Chr11	3569400	3571399	440	556	655	504	490	0.731275	0.0201953	up		LOC_Os09g34880	Chr9	20327400	20327799
Chr11	3613600	3614999	275	317	537	381	468	1.13263	6.87768e-05	up		LOC_Os12g04990	Chr12	2169400	2169999
Chr11	3649200	3650399	159	269	371	304	298	1.19	0.000965863	up		LOC_Os02g18860	Chr2	11007400	11007999
Chr11	3657400	3658799	296	322	399	334	273	0.759284	0.0129513	up		LOC_Os10g03800	Chr10	1716600	1718199
Chr11	3675800	3676599	196	208	254	217	262	0.734805	0.0320615	up		LOC_Os01g67920	Chr1	39473400	39473799
Chr11	3807400	3808399	239	206	364	266	340	0.990081	0.00631101	up		LOC_Os04g20990	Chr4	11809200	11809999
Chr11	3911600	3912399	184	259	280	225	272	0.709835	0.0382847	up		LOC_Os10g41950	Chr10	22562600	22563199
Chr11	3912800	3913399	117	98	168	138	201	1.00894	0.0100702	up		LOC_Os01g36294	Chr1	20124200	20124799
Chr11	3964800	3965399	160	145	234	176	254	0.921072	0.0224364	up		LOC_Os02g04660	Chr2	2092400	2092799
Chr11	4033600	4033999	104	105	149	103	119	0.76323	0.039549	up		LOC_Os04g17064	Chr4	9353600	9353999
Chr11	4182600	4183799	328	328	457	372	367	0.844059	0.00576883	up		LOC_Os01g41360	Chr1	23402200	23402999
Chr11	4184200	4184799	142	187	204	180	192	0.748961	0.0423026	up		LOC_Os03g21060	Chr3	11974600	11976799
Chr11	4324400	4325399	200	259	320	234	327	0.779531	0.012229	up		LOC_Os11g03750	Chr11	1472000	1472399
Chr11	4366400	4366799	76	79	152	115	138	1.28673	6.24307e-05	up		LOC_Os07g39750	Chr7	23823400	23824399
Chr11	4368200	4368599	85	133	166	138	126	1.00709	0.0103594	up		LOC_Os03g62600	Chr3	35434000	35434599
Chr11	4382600	4383199	175	160	234	184	272	0.818179	0.0390445	up		LOC_Os10g05140	Chr10	2509400	2509999
Chr11	4410200	4410999	146	153	250	182	218	1.02915	0.0019493	up		LOC_Os03g59860	Chr3	34077000	34077599
Chr11	4429000	4429599	104	156	223	187	232	1.18471	0.00134567	up		LOC_Os10g03900	Chr10	1772800	1773599
Chr11	4447200	4447599	58	61	144	111	106	1.60392	9.2595e-07	up		LOC_Os03g10530	Chr3	5367200	5367999
Chr11	4450400	4451799	224	284	460	365	436	1.21476	2.00625e-06	up		LOC_Os03g37140	Chr3	20593000	20593599
Chr11	4458000	4458999	210	284	359	263	259	0.842911	0.00944176	up		LOC_Os11g31620	Chr11	18490000	18490999
Chr11	4466600	4468199	229	333	514	378	517	1.18095	2.95229e-05	up		LOC_Os09g33770	Chr9	19939800	19941199
Chr11	4476800	4477399	141	154	265	197	237	1.14911	0.00120367	up		LOC_Os02g40784	Chr2	24723000	24725399
Chr11	4479800	4480799	172	202	312	242	283	1.07599	0.000134645	up		LOC_Os02g40800	Chr2	24723000	24725399
Chr11	4548800	4549399	153	156	217	159	126	0.780979	0.0192163	up		LOC_Os09g24370	Chr9	14479200	14479999
Chr11	4569000	4569999	297	327	529	373	448	1.02848	0.00029293	up		LOC_Os01g58590	Chr1	33876600	33876999
Chr11	4582600	4584199	388	469	525	385	480	0.591946	0.0456844	up		LOC_Os09g08970	Chr9	4771200	4772399
Chr11	4601800	4602199	107	113	163	128	103	0.908977	0.0152047	up		LOC_Os05g18970	Chr5	11004800	11006399
Chr11	4907800	4908799	282	286	391	284	321	0.744897	0.0244911	up		LOC_Os05g31310	Chr5	18201000	18201999
Chr11	4965400	4965999	94	157	192	173	159	1.07946	0.00782377	up		LOC_Os01g43740	Chr1	25061600	25063199
Chr11	4977600	4980599	534	693	896	772	798	0.969111	0.00100041	up		LOC_Os04g35610	Chr4	21704200	21705599
Chr11	5059000	5059599	147	141	220	176	213	0.962316	0.0145643	up		LOC_Os02g33680	Chr2	20082000	20082599
Chr11	5080000	5080599	136	186	226	189	110	0.888921	0.0122306	up		LOC_Os12g08750	Chr12	4479200	4479799
Chr11	5092200	5093199	172	226	304	245	322	0.981959	0.00143088	up		LOC_Os06g11360	Chr6	5976000	5976599
Chr11	5098400	5100199	352	471	517	410	447	0.689929	0.0269907	up		LOC_Os02g38200	Chr2	23109800	23110199
Chr11	5126800	5127599	176	229	308	271	266	1.04195	0.00111781	up		LOC_Os03g16010	Chr3	8827400	8828199
Chr11	5139000	5139599	223	245	322	254	268	0.807415	0.0321733	up		LOC_Os07g35300	Chr7	21127800	21128199
Chr11	5143400	5144399	269	264	392	321	347	0.925885	0.00554578	up		LOC_Os12g02790	Chr12	986000	987399
Chr11	5302600	5302999	94	87	196	168	103	1.51668	3.55033e-06	up		LOC_Os01g23810	Chr1	13396200	13397199
Chr11	5389400	5390399	309	342	177	113	153	-0.676674	0.0442169	down		LOC_Os03g01200	Chr3	132000	132599
Chr11	5468400	5468999	118	187	197	167	166	0.785864	0.0455815	up		LOC_Os05g29960	Chr5	17331600	17331999
Chr11	5514600	5514799	38	42	67	50	62	1.05179	0.0168343	up		LOC_Os06g28600	Chr6	16275800	16276599
Chr11	5567600	5568199	143	193	224	196	208	0.848799	0.0227089	up		LOC_Os10g22590	Chr10	11723200	11723999
Chr11	5608200	5609399	274	323	384	262	370	0.611202	0.0491234	up		LOC_Os11g06460	Chr11	3117400	3118399
Chr11	5614000	5614799	182	191	302	240	302	1.04559	0.00683015	up		LOC_Os08g37874	Chr8	23992800	23994199
Chr11	5805600	5806399	198	135	281	196	153	0.990642	0.0373136	up		LOC_Os11g16380	Chr11	9046400	9047199
Chr11	5815200	5816199	244	272	417	269	341	0.900008	0.00352589	up		LOC_Os12g08840	Chr12	4563200	4563599
Chr11	5936400	5936999	142	128	228	186	179	1.11889	0.00144822	up		LOC_Os02g44020	Chr2	26577800	26578599
Chr11	5951200	5952999	373	510	758	594	569	1.13323	0.000107487	up		LOC_Os04g40590	Chr4	24103200	24103599
Chr11	5962600	5962999	72	83	201	111	122	1.48771	1.41737e-05	up		LOC_Os04g40600	Chr4	24103200	24103599
Chr11	5963600	5964799	237	249	348	310	285	0.954793	0.00280412	up		LOC_Os11g27240	Chr11	15669400	15670599
Chr11	5998400	5999399	146	204	284	230	288	1.07542	0.000530784	up		LOC_Os02g09520	Chr2	4906800	4907399
Chr11	6020800	6022199	258	356	453	324	456	0.84916	0.018192	up		LOC_Os05g41220	Chr5	24140400	24140799
Chr11	6041200	6041799	159	146	220	169	201	0.848142	0.0208272	up		LOC_Os08g09400	Chr8	5450800	5451199
Chr11	6056600	6057399	196	186	290	212	234	0.887946	0.00875315	up		LOC_Os09g02000	Chr9	693400	693799
Chr11	6190200	6192199	445	521	662	494	597	0.764584	0.00534856	up		LOC_Os06g20380	Chr6	11705000	11705999
Chr11	6664400	6665399	72	88	249	193	25	1.97665	1.51998e-10	up		LOC_Os06g45840	Chr6	27740000	27740999
Chr11	6686400	6688799	0	0	757	549	0	12.2918	2.77976e-14	up		LOC_Os03g27480	Chr3	15766000	15767399
Chr11	6749800	6750399	0	0	195	148	0	10.3673	4.89095e-10	up		LOC_Os07g44499	Chr7	26567200	26567599
Chr11	6773200	6773999	0	0	255	187	0	10.7299	9.36527e-11	up		LOC_Os12g32850	Chr12	19849000	19849399
Chr11	6784200	6785399	0	0	397	267	0	11.3083	5.61059e-12	up		LOC_Os08g02080	Chr8	683200	683999
Chr11	6826000	6827999	0	0	635	433	0	11.9951	1.47257e-13	up		LOC_Os01g35230	Chr1	19507600	19508399
Chr11	6835200	6836799	0	0	629	471	1	12.0474	1.07679e-13	up		LOC_Os03g36920	Chr3	20490200	20491199
Chr11	6858600	6858999	0	0	178	126	0	10.1867	1.1091e-09	up		LOC_Os07g29230	Chr7	17131000	17131799
Chr11	6932400	6933999	0	2	512	390	0	9.32771	5.85281e-16	up		LOC_Os02g42610	Chr2	25638000	25638799
Chr11	6935600	6936599	0	0	491	336	0	11.6267	1.05089e-12	up		LOC_Os11g37640	Chr11	22218400	22218799
Chr11	6940000	6941999	55	28	600	509	62	4.22762	1.705e-25	up		LOC_Os08g41460	Chr8	26177200	26177799
Chr11	697000	697399	73	94	123	100	143	0.93422	0.0458253	up		LOC_Os02g51150	Chr2	31299600	31299999
Chr11	6973200	6974399	0	0	437	373	0	11.6195	1.1777e-12	up		LOC_Os10g41083	Chr10	22065200	22066399
Chr11	6975400	6976199	185	188	243	197	192	0.744879	0.0277325	up		LOC_Os03g13950	Chr3	7567400	7567799
Chr11	6980000	6980999	25	25	355	283	94	4.18078	3.1458e-21	up		LOC_Os01g22650	Chr1	12739800	12740199
Chr11	7000600	7001599	14	8	437	322	15	5.60164	2.15747e-37	up		LOC_Os06g29710	Chr6	17054200	17056399
Chr11	7012000	7013999	324	347	734	587	524	1.48558	1.0313e-08	up		LOC_Os11g10910	Chr11	6020800	6022199
Chr11	7014400	7014999	119	105	263	240	142	1.67998	1.25507e-07	up		LOC_Os03g58030	Chr3	33037400	33037999
Chr11	7052600	7053599	97	142	328	246	151	1.77972	1.22307e-08	up		LOC_Os11g04440	Chr11	1853400	1854799
Chr11	7061000	7061799	80	82	209	175	112	1.75598	2.15024e-09	up		LOC_Os11g10250	Chr11	5567600	5568199
Chr11	7064200	7065799	309	399	490	366	237	0.784274	0.00989897	up		LOC_Os01g14060	Chr1	7870800	7871399
Chr11	7078600	7079199	62	79	187	177	87	1.89902	6.02162e-09	up		LOC_Os01g72370	Chr1	41977200	41977999
Chr11	7080200	7080999	65	44	234	193	64	2.4642	3.77808e-11	up		LOC_Os03g42220	Chr3	23484400	23485999
Chr11	7084600	7084999	34	25	143	111	15	2.60183	5.94238e-12	up		LOC_Os01g69160	Chr1	40203000	40203599
Chr11	7119800	7120199	1	1	126	91	2	7.26373	1.66835e-09	up		LOC_Os06g01750	Chr6	437600	438399
Chr11	7143600	7144799	61	64	384	321	100	3.00872	2.25849e-26	up		LOC_Os07g18240	Chr7	10812200	10813199
Chr11	7155400	7155799	0	0	185	135	0	10.2635	7.80009e-10	up		LOC_Os12g04390	Chr12	1863400	1863799
Chr11	7181000	7181599	320	310	411	314	365	0.701093	0.0384498	up		LOC_Os08g09640	Chr8	5574000	5574399
Chr11	7194000	7194599	86	79	168	141	116	1.41136	0.000396261	up		LOC_Os12g11870	Chr12	6463800	6464399
Chr11	7229000	7229999	138	146	345	247	194	1.55679	4.62313e-08	up		LOC_Os01g53890	Chr1	30985200	30986199
Chr11	7336200	7337399	0	0	410	307	0	11.4299	2.89531e-12	up		LOC_Os05g12190	Chr5	6982200	6982999
Chr11	7436000	7436799	157	135	244	197	179	1.09384	0.00181907	up		LOC_Os11g48064	Chr11	28981200	28981999
Chr11	7483000	7483799	130	109	253	198	159	1.41166	1.51764e-05	up		LOC_Os10g05550	Chr10	2751600	2753599
Chr11	7486400	7487399	238	174	386	267	241	1.13891	0.00567025	up		LOC_Os12g43610	Chr12	27071600	27072799
Chr11	7549600	7550999	469	503	161	105	230	-1.38078	9.2479e-05	down		LOC_Os10g35180	Chr10	18784600	18785399
Chr11	7901600	7902199	172	165	216	194	183	0.796565	0.0423954	up		LOC_Os03g60710	Chr3	34502800	34503599
Chr11	8018400	8019199	124	156	241	187	181	1.12409	0.000212674	up		LOC_Os01g58640	Chr1	33896800	33898199
Chr11	8068800	8069399	162	172	226	170	215	0.747344	0.0439948	up		LOC_Os02g08140	Chr2	4309600	4310199
Chr11	8108000	8110199	643	847	254	190	234	-1.23487	3.49618e-06	down		LOC_Os05g14290	Chr5	8028600	8029599
Chr11	8141400	8142199	291	347	144	117	137	-0.776643	0.0182083	down		LOC_Os01g55700	Chr1	32081800	32084399
Chr11	8272400	8274199	540	629	738	617	646	0.730178	0.0263374	up		LOC_Os01g55710	Chr1	32081800	32084399
Chr11	8333800	8334199	76	71	119	102	155	1.09654	0.00812592	up		LOC_Os03g53110	Chr3	30458200	30458799
Chr11	8356000	8356999	354	411	189	151	140	-0.659388	0.0377372	down		LOC_Os06g45120	Chr6	27292200	27292799
Chr11	8405000	8405399	129	119	181	132	130	0.829068	0.0256994	up		LOC_Os03g21260	Chr3	12145400	12146199
Chr11	8453000	8454399	418	451	613	440	541	0.77452	0.0167156	up		LOC_Os05g39590	Chr5	23246800	23247199
Chr11	8467400	8467999	156	186	228	175	156	0.745438	0.0282792	up		LOC_Os08g43654	Chr8	27593000	27593799
Chr11	8473400	8474799	313	314	417	362	396	0.826129	0.0128679	up		LOC_Os09g12530	Chr9	7179400	7181399
Chr11	8579400	8579799	115	167	70	41	64	-0.846149	0.0454614	down		LOC_Os04g12450	Chr4	6879400	6880399
Chr11	8602200	8603199	193	206	337	260	310	1.08575	0.000410087	up		LOC_Os12g33300	Chr12	20141200	20141599
Chr11	8615000	8615999	177	211	328	248	258	1.07753	0.000330245	up		LOC_Os05g11190	Chr5	6316400	6316799
Chr11	8710000	8710799	247	205	319	229	240	0.762796	0.0499226	up		LOC_Os08g36320	Chr8	22882200	22883199
Chr11	8721000	8721599	138	94	193	141	173	1.00366	0.0428425	up		LOC_Os07g05310	Chr7	2421400	2422799
Chr11	8857200	8858999	395	347	584	432	465	0.943338	0.00737288	up		LOC_Os07g41970	Chr7	25129400	25129799
Chr11	8870400	8870799	139	144	66	41	76	-0.916224	0.0416687	down		LOC_Os07g48360	Chr7	28901400	28901799
Chr11	9046400	9047199	222	260	356	259	256	0.854633	0.0026089	up		LOC_Os04g09520	Chr4	5097600	5098599
Chr11	9141800	9142599	167	173	284	220	201	1.07139	0.000280393	up		LOC_Os05g31290	Chr5	18193800	18194599
Chr11	9193400	9194799	306	398	495	351	540	0.770791	0.0259923	up		LOC_Os08g29210	Chr8	17911400	17911999
Chr11	9269200	9270599	328	298	470	361	310	0.904394	0.0101252	up		LOC_Os01g65710	Chr1	38151400	38151999
Chr11	9482600	9482799	41	47	79	64	47	1.21058	0.00266466	up		LOC_Os09g38450	Chr9	22136000	22137199
Chr11	9492000	9492799	199	185	244	224	192	0.799821	0.0348482	up		LOC_Os01g24020	Chr1	13532000	13532599
Chr11	9543000	9543599	128	120	231	190	209	1.26841	0.000179335	up		LOC_Os10g23280	Chr10	12150400	12151199
Chr11	9598000	9598799	182	177	274	202	235	0.902983	0.00499695	up		LOC_Os08g17600	Chr8	10758600	10758999
Chr11	9709000	9709799	168	167	275	210	228	1.03375	0.010515	up		LOC_Os05g08360	Chr5	4558200	4558799
Chr11	9756000	9756999	313	313	406	310	293	0.693824	0.031734	up		LOC_Os07g19000	Chr7	11250600	11251599
Chr11	9784800	9785599	195	181	278	204	269	0.851541	0.0123152	up		LOC_Os12g10980	Chr12	5925200	5925799
Chr11	9819600	9820199	107	106	191	130	204	1.08253	0.00110903	up		LOC_Os01g54920	Chr1	31588400	31588999
Chr11	9885400	9885999	136	172	232	154	217	0.824061	0.0144686	up		LOC_Os03g27490	Chr3	15774000	15774399
Chr11	9901800	9903599	582	658	298	237	293	-0.703193	0.0261803	down		LOC_Os01g53150	Chr1	30537000	30537799
Chr11	9963600	9964199	230	285	87	65	89	-1.25276	3.45531e-05	down		LOC_Os06g02170	Chr6	657200	658999
Chr12	10119800	10120399	210	183	271	212	233	0.793479	0.0355189	up		LOC_Os10g25565	Chr10	13254600	13255199
Chr12	10320800	10321799	168	182	331	207	306	1.10536	0.000781492	up		LOC_Os09g17329	Chr9	10610200	10610999
Chr12	10401800	10402599	265	226	397	265	294	0.90973	0.018846	up		LOC_Os05g34854	Chr5	20690400	20690999
Chr12	10659200	10659599	66	82	136	94	130	1.13728	0.00106846	up		LOC_Os08g36750	Chr8	23207200	23207999
Chr12	10745600	10745999	193	160	72	44	40	-1.13126	0.00835571	down		LOC_Os01g42830	Chr1	24375800	24376199
Chr12	1074800	1075399	99	106	169	157	170	1.19049	0.000479123	up		LOC_Os02g10890	Chr2	5778800	5779799
Chr12	10973800	10974399	124	131	175	153	185	0.878678	0.0344293	up		LOC_Os06g14420	Chr6	8069400	8070199
Chr12	11168200	11169399	286	310	383	274	394	0.638416	0.0370537	up		LOC_Os01g74170	Chr1	42970400	42970999
Chr12	11178000	11178999	216	294	388	311	403	0.9751	0.0104689	up		LOC_Os01g74180	Chr1	42970400	42970999
Chr12	11381400	11382199	249	229	327	240	327	0.738504	0.0452035	up		LOC_Os11g18320	Chr11	10338400	10338799
Chr12	11395600	11396199	344	311	133	116	92	-0.889823	0.0169248	down		LOC_Os04g13140	Chr4	7250200	7251199
Chr12	11402400	11403399	280	283	430	285	381	0.831593	0.0111028	up		LOC_Os09g16390	Chr9	10023000	10023599
Chr12	1140400	1140799	94	98	144	110	92	0.906387	0.0131671	up		LOC_Os07g17470	Chr7	10311800	10312599
Chr12	11407600	11407999	95	109	153	133	162	1.00493	0.0044835	up		LOC_Os04g29730	Chr4	17718000	17719599
Chr12	11436200	11437999	355	424	499	384	540	0.69036	0.0288526	up		LOC_Os05g46050	Chr5	26713600	26713999
Chr12	11549400	11550199	382	332	167	121	179	-0.822408	0.0355716	down		LOC_Os12g28550	Chr12	16873000	16874599
Chr12	11558600	11559399	183	227	253	196	223	0.642335	0.0488909	up		LOC_Os04g51680	Chr4	30615600	30616799
Chr12	11787000	11788399	339	339	484	341	419	0.7752	0.012988	up		LOC_Os01g08360	Chr1	4099200	4099599
Chr12	11792000	11793199	296	255	496	322	431	1.04623	0.00272608	up		LOC_Os03g49580	Chr3	28235200	28235999
Chr12	11813800	11814799	360	341	488	343	350	0.734402	0.0282985	up		LOC_Os06g49200	Chr6	29811400	29811999
Chr12	11822600	11823399	176	195	378	267	225	1.29568	1.08122e-06	up		LOC_Os02g29090	Chr2	17223000	17224799
Chr12	11889000	11890599	461	507	589	438	565	0.587396	0.0429599	up		LOC_Os04g36620	Chr4	22087400	22088199
Chr12	11938600	11939399	216	149	346	242	225	1.16054	0.011062	up		LOC_Os01g13840	Chr1	7764800	7766199
Chr12	11982400	11984199	367	406	586	415	487	0.870483	0.00116243	up		LOC_Os11g19470	Chr11	11211000	11211399
Chr12	11991800	11994399	515	501	1216	919	723	1.56879	5.26601e-11	up		LOC_Os07g18660	Chr7	11029600	11030399
Chr12	11995200	11996599	352	284	607	530	622	1.3412	8.68888e-05	up		LOC_Os09g31000	Chr9	18662400	18663199
Chr12	12001200	12001599	74	62	154	110	133	1.44652	2.22838e-05	up		LOC_Os01g11710	Chr1	6319000	6319799
Chr12	12003000	12005799	818	685	1416	1094	1143	1.23125	7.58613e-05	up		LOC_Os01g61810	Chr1	35758000	35758799
Chr12	1200800	1201399	129	125	246	159	210	1.15634	0.00278801	up		LOC_Os06g37210	Chr6	21981000	21981999
Chr12	12008600	12009199	205	189	366	263	336	1.16571	8.12334e-05	up		LOC_Os11g22460	Chr11	12907200	12908199
Chr12	12093800	12096799	790	888	997	794	925	0.604269	0.0465692	up		LOC_Os12g09000	Chr12	4710600	4710999
Chr12	12132800	12133599	225	276	357	251	304	0.781252	0.0190616	up		LOC_Os11g14930	Chr11	8405000	8405399
Chr12	12247000	12247399	73	74	106	107	87	1.0605	0.0125155	up		LOC_Os05g02920	Chr5	1068800	1070399
Chr12	1246400	1246999	167	158	212	176	195	0.76115	0.0416404	up		LOC_Os05g00988	Chr5	3600	4599
Chr12	12614000	12614799	198	207	267	210	254	0.741137	0.0236389	up		LOC_Os04g51480	Chr4	30495200	30495999
Chr12	12654600	12655599	332	315	414	356	400	0.760345	0.0388485	up		LOC_Os07g35760	Chr7	21421400	21422399
Chr12	12804200	12805799	524	509	692	521	530	0.728604	0.0184573	up		LOC_Os12g40720	Chr12	25207000	25207799
Chr12	12812200	12812599	109	91	159	111	159	0.918241	0.0248488	up		LOC_Os08g25680	Chr8	15623800	15625199
Chr12	12859000	12859799	206	158	311	201	235	0.963113	0.0195758	up		LOC_Os03g04710	Chr3	2250000	2250599
Chr12	13023400	13023599	71	50	99	73	52	0.991656	0.0442686	up		LOC_Os01g04050	Chr1	1760400	1760999
Chr12	13049000	13050599	520	595	271	189	314	-0.779314	0.0171477	down		LOC_Os11g26760	Chr11	15327800	15328799
Chr12	13403600	13403799	180	93	237	199	126	1.15306	0.0492324	up		LOC_Os02g18510	Chr2	10780200	10780999
Chr12	13484800	13485199	88	91	175	116	120	1.19057	0.00279276	up		LOC_Os07g47590	Chr7	28456200	28456799
Chr12	13705400	13705799	95	95	162	120	103	1.06809	0.00325621	up		LOC_Os03g08410	Chr3	4313200	4314399
Chr12	1375400	1376599	239	295	395	297	349	0.88253	0.00142251	up		LOC_Os11g15050	Chr11	8473400	8474799
Chr12	13948800	13949399	191	178	240	200	209	0.759076	0.0387442	up		LOC_Os11g30210	Chr11	17565400	17566599
Chr12	14026800	14027599	144	165	236	177	204	0.923433	0.00642702	up		LOC_Os06g10260	Chr6	5265200	5265999
Chr12	14109800	14110199	110	80	159	128	153	1.08679	0.012853	up		LOC_Os08g10380	Chr8	6085200	6086199
Chr12	14123600	14124399	231	214	310	232	238	0.779196	0.0225763	up		LOC_Os10g09830	Chr10	5320600	5321199
Chr12	14140000	14141199	270	340	373	293	290	0.640536	0.0425069	up		LOC_Os02g55890	Chr2	34214600	34214999
Chr12	14233200	14234799	362	452	555	393	598	0.723391	0.0144466	up		LOC_Os05g31050	Chr5	18039600	18040399
Chr12	14304200	14305999	457	443	712	523	733	0.950832	0.00117282	up		LOC_Os06g10860	Chr6	5665000	5665399
Chr12	14316400	14316799	110	95	190	119	157	1.06892	0.00559718	up		LOC_Os08g03100	Chr8	1404600	1406599
Chr12	1433000	1433999	310	352	474	331	312	0.779784	0.00630961	up		LOC_Os11g43890	Chr11	26503600	26504199
Chr12	14345200	14346399	273	305	373	294	354	0.715089	0.0241861	up		LOC_Os01g65460	Chr1	37994200	37995599
Chr12	14421400	14421999	130	177	219	158	210	0.805178	0.0199702	up		LOC_Os01g52020	Chr1	29900000	29901399
Chr12	14426600	14427199	133	162	189	172	190	0.816894	0.0383502	up		LOC_Os09g36060	Chr9	20764200	20764999
Chr12	14457800	14459399	347	448	552	433	518	0.824734	0.0105872	up		LOC_Os06g05640	Chr6	2554400	2554799
Chr12	14540800	14541599	185	161	291	211	217	1.026	0.0026999	up		LOC_Os11g27620	Chr11	15904200	15905199
Chr12	14546800	14547199	89	126	146	122	127	0.840558	0.0293963	up		LOC_Os08g31740	Chr8	19669600	19670399
Chr12	14572200	14572599	79	103	143	108	150	0.97481	0.029643	up		LOC_Os04g23420	Chr4	13388800	13389599
Chr12	14619400	14620199	358	279	102	63	100	-1.48013	0.000152274	down		LOC_Os08g13320	Chr8	7911000	7912399
Chr12	14657600	14658599	230	261	335	268	288	0.806914	0.0063113	up		LOC_Os08g42440	Chr8	26796200	26797399
Chr12	14783200	14783799	142	109	235	172	164	1.18194	0.00201808	up		LOC_Os11g06430	Chr11	3105200	3105799
Chr12	15159600	15160199	185	167	275	226	179	1.01181	0.00803738	up		LOC_Os12g09360	Chr12	4909600	4910399
Chr12	15247200	15247399	47	46	71	63	86	1.03874	0.0192618	up		LOC_Os08g41190	Chr8	26020400	26021399
Chr12	1525600	1526799	251	299	353	256	338	0.650587	0.0374929	up		LOC_Os10g31550	Chr10	16522200	16523799
Chr12	15309800	15310399	137	126	184	147	178	0.83277	0.0245678	up		LOC_Os06g34970	Chr6	20337800	20338599
Chr12	15348000	15349199	218	232	404	304	449	1.15564	0.000105882	up		LOC_Os04g53380	Chr4	31800000	31800599
Chr12	1535600	1536199	127	123	202	160	171	1.03669	0.0038869	up		LOC_Os12g27220	Chr12	15973000	15973599
Chr12	15395800	15396199	94	103	149	113	115	0.915314	0.0445407	up		LOC_Os07g47790	Chr7	28541000	28542199
Chr12	15422400	15423599	356	420	527	404	406	0.771466	0.0387648	up		LOC_Os09g21760	Chr9	13177200	13177999
Chr12	15566800	15567799	205	250	309	259	212	0.838185	0.00603297	up		LOC_Os07g13570	Chr7	7785000	7786399
Chr12	15645800	15646199	106	111	168	122	117	0.916679	0.0158671	up		LOC_Os02g54110	Chr2	33153200	33153799
Chr12	15650400	15651199	239	258	320	241	257	0.677253	0.0335873	up		LOC_Os09g13740	Chr9	8047400	8048399
Chr12	1573400	1574599	243	320	438	373	355	1.05125	0.0012011	up		LOC_Os06g20070	Chr6	11510200	11510799
Chr12	15865000	15866199	242	321	370	255	321	0.65459	0.0466521	up		LOC_Os09g07350	Chr9	3654800	3655599
Chr12	15877400	15877999	145	155	206	174	186	0.853453	0.0108913	up		LOC_Os08g36660	Chr8	23132600	23136599
Chr12	15965800	15966399	120	133	180	158	201	0.935124	0.00623098	up		LOC_Os08g28970	Chr8	17730200	17731199
Chr12	15973000	15973599	191	191	261	214	193	0.821384	0.0287865	up		LOC_Os08g28980	Chr8	17730200	17731199
Chr12	16000000	16000599	149	128	237	195	245	1.14198	0.00140141	up		LOC_Os01g12760	Chr1	7064600	7065199
Chr12	16160400	16160599	43	63	96	61	71	1.06728	0.0129265	up		LOC_Os01g33770	Chr1	18589600	18590399
Chr12	16206200	16206599	248	157	81	49	50	-1.18311	0.0275488	down		LOC_Os11g08314	Chr11	4382600	4383199
Chr12	16274000	16275599	472	441	608	471	576	0.738758	0.0322217	up		LOC_Os11g03484	Chr11	1345000	1346199
Chr12	16281600	16282199	134	147	201	138	177	0.766065	0.0319749	up		LOC_Os03g22560	Chr3	12961600	12961999
Chr12	1628600	1629199	133	151	283	213	159	1.30934	7.9997e-07	up		LOC_Os04g54100	Chr4	32236400	32236799
Chr12	16303800	16304799	328	282	491	342	399	0.932389	0.0121265	up		LOC_Os08g14130	Chr8	8447200	8448999
Chr12	16368000	16368999	219	246	366	305	358	1.04383	0.00853344	up		LOC_Os01g06720	Chr1	3176400	3177399
Chr12	16406000	16406599	138	101	191	166	217	1.07757	0.0128026	up		LOC_Os01g03420	Chr1	1375400	1376399
Chr12	16428600	16429399	209	196	286	247	270	0.905346	0.0135974	up		LOC_Os10g04860	Chr10	2362400	2363199
Chr12	1645600	1646399	202	234	288	240	229	0.791821	0.0293565	up		LOC_Os01g53250	Chr1	30598000	30598599
Chr12	1651800	1652399	139	154	191	148	206	0.716591	0.0435643	up		LOC_Os09g33670	Chr9	19881200	19881799
Chr12	16595400	16596799	342	440	535	383	454	0.737505	0.0473821	up		LOC_Os07g23580	Chr7	13330000	13330999
Chr12	1669400	1670199	157	175	264	194	225	0.966017	0.0018432	up		LOC_Os02g40020	Chr2	24228600	24229399
Chr12	16712200	16712799	108	123	187	150	184	1.05569	0.00581722	up		LOC_Os04g11050	Chr4	6008000	6008399
Chr12	16714600	16714999	90	81	140	101	108	0.987373	0.00953955	up		LOC_Os06g05260	Chr6	2372800	2374599
Chr12	16754000	16754399	192	175	78	56	61	-0.962759	0.0125074	down		LOC_Os01g02350	Chr1	744400	744999
Chr12	16873000	16874599	478	560	696	594	606	0.833294	0.0187265	up		LOC_Os01g02360	Chr1	744400	744999
Chr12	16970600	16971199	133	117	191	161	253	0.997712	0.00919418	up		LOC_Os01g55010	Chr1	31633800	31635399
Chr12	17049600	17051199	453	443	596	430	592	0.688344	0.0419761	up		LOC_Os01g55020	Chr1	31633800	31635399
Chr12	1721400	1721999	88	90	184	140	197	1.36591	3.17152e-05	up		LOC_Os10g13380	Chr10	7228000	7228399
Chr12	17266000	17266599	198	171	289	210	173	0.923969	0.0128923	up		LOC_Os06g23504	Chr6	13717600	13718799
Chr12	17338600	17339399	202	162	333	226	315	1.09666	0.00561579	up		LOC_Os01g48680	Chr1	27920400	27921399
Chr12	1736000	1736999	170	211	359	283	365	1.26643	4.97577e-05	up		LOC_Os11g27170	Chr11	15648400	15650399
Chr12	1738000	1738999	188	173	291	238	245	1.05438	0.00253434	up		LOC_Os05g18470	Chr5	10675200	10675999
Chr12	1746200	1746999	157	182	218	182	251	0.754084	0.0467228	up		LOC_Os07g23410	Chr7	13201200	13202599
Chr12	1762200	1762799	140	151	235	157	188	0.922072	0.00403032	up		LOC_Os02g02330	Chr2	774600	775199
Chr12	17951200	17951799	141	109	204	153	189	1.00122	0.0137779	up		LOC_Os01g38359	Chr1	21542600	21544199
Chr12	18112400	18113399	273	252	410	336	394	1.01012	0.00229938	up		LOC_Os10g12120	Chr10	6729800	6730399
Chr12	18156400	18157399	191	177	322	255	273	1.14916	0.000856351	up		LOC_Os08g43430	Chr8	27473800	27475199
Chr12	18166400	18169799	790	909	1161	878	1187	0.769279	0.00867041	up		LOC_Os10g29760	Chr10	15473000	15473599
Chr12	18172000	18173599	346	375	509	397	478	0.835596	0.00240721	up		LOC_Os03g18454	Chr3	10356800	10357599
Chr12	18199800	18200199	90	63	121	88	117	0.93181	0.0475385	up		LOC_Os06g40600	Chr6	24211600	24212599
Chr12	18272000	18273599	368	339	505	365	374	0.789529	0.0211643	up		LOC_Os02g11990	Chr2	6218000	6219199
Chr12	18369000	18369999	348	376	173	146	180	-0.670686	0.0488732	down		LOC_Os01g63050	Chr1	36527800	36528599
Chr12	1838200	1838999	185	247	299	207	296	0.732617	0.0274856	up		LOC_Os09g14890	Chr9	8889600	8890999
Chr12	1843200	1843999	136	207	254	194	203	0.904837	0.0127787	up		LOC_Os11g26840	Chr11	15418600	15419199
Chr12	1844800	1846199	256	322	397	339	401	0.870768	0.00437867	up		LOC_Os09g20100	Chr9	12043800	12044799
Chr12	18454200	18454999	360	339	145	116	133	-0.921035	0.0129441	down		LOC_Os06g24040	Chr6	14045800	14046399
Chr12	18463200	18463799	113	150	208	151	155	0.956966	0.0030005	up		LOC_Os05g23880	Chr5	13734400	13735399
Chr12	18481200	18481999	159	182	256	188	266	0.883737	0.00525892	up		LOC_Os07g46100	Chr7	27516400	27517199
Chr12	18594600	18595599	332	383	176	137	161	-0.683738	0.0382847	down		LOC_Os05g05470	Chr5	2722800	2723599
Chr12	1863400	1863799	140	138	198	155	107	0.846573	0.0453453	up		LOC_Os02g13510	Chr2	7221000	7223199
Chr12	18661800	18662599	213	220	290	230	266	0.769484	0.0422404	up		LOC_Os07g34780	Chr7	20842600	20843399
Chr12	18718200	18718999	198	181	300	222	272	0.95503	0.00498399	up		LOC_Os08g01880	Chr8	540200	540999
Chr12	18763200	18764199	201	217	297	220	328	0.80776	0.00756586	up		LOC_Os01g59300	Chr1	34278400	34278799
Chr12	18770800	18771999	182	222	365	278	376	1.17991	0.000189843	up		LOC_Os01g42620	Chr1	24243600	24244599
Chr12	18783800	18784399	110	127	204	135	175	1.01032	0.0078054	up		LOC_Os08g32650	Chr8	20219800	20221399
Chr12	18786000	18787399	287	376	436	336	448	0.733839	0.0271432	up		LOC_Os03g06600	Chr3	3318000	3318799
Chr12	18822800	18823199	218	158	60	48	48	-1.31305	0.00630961	down		LOC_Os01g20710	Chr1	11523200	11524799
Chr12	18832600	18833999	408	401	544	414	522	0.742523	0.0259061	up		LOC_Os09g14510	Chr9	8585800	8586199
Chr12	18891600	18892799	396	404	203	132	218	-0.769108	0.0191271	down		LOC_Os06g50950	Chr6	30838600	30839799
Chr12	18933000	18933399	69	79	122	108	116	1.15442	0.00152841	up		LOC_Os12g05250	Chr12	2334200	2334999
Chr12	19094600	19095199	150	166	215	152	204	0.71398	0.0460083	up		LOC_Os12g31160	Chr12	18763200	18764199
Chr12	19195200	19195999	200	186	285	223	284	0.895266	0.0221573	up		LOC_Os11g09610	Chr11	5139000	5139599
Chr12	19275800	19276999	278	279	398	305	353	0.836407	0.0156079	up		LOC_Os11g18690	Chr11	10582000	10583199
Chr12	19281800	19282399	134	155	207	165	150	0.87549	0.0482849	up		LOC_Os04g57170	Chr4	34065000	34065999
Chr12	19379200	19379599	120	102	157	135	119	0.899707	0.025282	up		LOC_Os02g01150	Chr2	82600	82999
Chr12	19392400	19393399	190	209	341	224	325	0.992708	0.00063247	up		LOC_Os10g29830	Chr10	15503800	15504799
Chr12	19407600	19411199	847	988	1146	865	874	0.638738	0.0231167	up		LOC_Os08g27490	Chr8	16779200	16780799
Chr12	19482600	19483199	384	319	175	104	129	-0.866428	0.0488918	down		LOC_Os03g32610	Chr3	18663000	18663999
Chr12	19607600	19609199	413	463	615	462	585	0.80205	0.00357864	up		LOC_Os09g08400	Chr9	4360000	4360599
Chr12	19749000	19749799	201	196	306	214	274	0.880051	0.0128215	up		LOC_Os11g39280	Chr11	23389800	23390599
Chr12	19849000	19849399	95	133	160	127	126	0.850794	0.0456319	up		LOC_Os01g71040	Chr1	41113600	41114599
Chr12	19857000	19857799	197	126	283	226	257	1.13895	0.016166	up		LOC_Os04g29990	Chr4	17890600	17891599
Chr12	19918600	19918999	93	57	121	111	154	1.12558	0.0384948	up		LOC_Os04g18030	Chr4	9943000	9943799
Chr12	20039000	20039799	292	255	357	334	267	0.850917	0.0348482	up		LOC_Os01g52980	Chr1	30454200	30455399
Chr12	20141200	20141599	112	117	165	125	114	0.842686	0.0150595	up		LOC_Os01g02334	Chr1	738400	739799
Chr12	2022400	2022799	95	122	176	127	138	0.98785	0.00852736	up		LOC_Os01g01115	Chr1	58800	59599
Chr12	2040200	2040599	78	82	159	120	127	1.30428	0.000428726	up		LOC_Os01g01520	Chr1	270400	271199
Chr12	2041800	2043199	214	341	410	318	435	0.916258	0.017409	up		LOC_Os11g23880	Chr11	13521400	13521999
Chr12	204200	204999	139	203	254	210	263	0.966391	0.0230921	up		LOC_Os11g32350	Chr11	19108000	19109399
Chr12	2067600	2068199	106	83	189	146	156	1.31747	0.000410957	up		LOC_Os12g32480	Chr12	19607600	19609199
Chr12	21018600	21019199	108	122	152	158	182	0.964873	0.0171019	up		LOC_Os06g17890	Chr6	10382800	10383199
Chr12	21122400	21122999	107	132	216	147	152	1.10212	0.00457402	up		LOC_Os07g13050	Chr7	7483800	7484199
Chr12	21229400	21230199	478	370	169	101	171	-1.18826	0.00758241	down		LOC_Os08g32850	Chr8	20362400	20362799
Chr12	21312200	21312599	89	78	150	130	99	1.25261	0.0016438	up		LOC_Os08g20400	Chr8	12248200	12248799
Chr12	21330600	21333999	1042	1274	652	439	653	-0.588304	0.0402276	down		LOC_Os10g07616	Chr10	4228200	4229199
Chr12	2140800	2142599	626	624	789	628	719	0.684761	0.0364507	up		LOC_Os03g51890	Chr3	29755200	29755999
Chr12	21489000	21489399	153	162	61	63	85	-0.822064	0.048616	down		LOC_Os05g31525	Chr5	18338800	18339999
Chr12	21558000	21558799	220	214	313	218	277	0.781111	0.0286635	up		LOC_Os07g29110	Chr7	17052400	17053599
Chr12	21597200	21598399	392	436	581	426	522	0.783527	0.0160981	up		LOC_Os09g32948	Chr9	19653000	19653999
Chr12	2169400	2169999	103	173	185	162	203	0.867082	0.0403178	up		LOC_Os11g34880	Chr11	20449400	20450799
Chr12	21761200	21761999	200	252	315	245	214	0.821709	0.00714065	up		LOC_Os10g11370	Chr10	6304200	6304799
Chr12	21766600	21767399	171	149	286	225	308	1.17199	0.00202617	up		LOC_Os09g36710	Chr9	21171600	21172399
Chr12	21774800	21777199	668	716	836	653	794	0.611183	0.0483857	up		LOC_Os04g29060	Chr4	17225200	17225799
Chr12	21843800	21845399	441	458	607	470	619	0.763809	0.0220043	up		LOC_Os02g13410	Chr2	7156800	7157599
Chr12	21914200	21914999	164	194	268	223	231	0.971583	0.00118727	up		LOC_Os07g47840	Chr7	28566000	28566799
Chr12	22196000	22196999	211	222	280	204	294	0.658996	0.0450062	up		LOC_Os07g45790	Chr7	27334000	27334999
Chr12	22311000	22311999	384	440	106	92	83	-1.54131	1.47262e-07	down		LOC_Os01g63270	Chr1	36675800	36676399
Chr12	22376200	22376999	298	294	68	64	52	-1.65024	2.15632e-05	down		LOC_Os03g08900	Chr3	4606200	4607399
Chr12	22400800	22401399	166	181	242	167	220	0.73246	0.031194	up		LOC_Os02g26014	Chr2	15276200	15276799
Chr12	2240200	2240599	136	111	176	147	170	0.886732	0.0310642	up		LOC_Os06g49000	Chr6	29701600	29701999
Chr12	22483800	22485399	499	482	628	523	606	0.737498	0.033829	up		LOC_Os10g36880	Chr10	19767200	19768399
Chr12	22577800	22578399	192	188	232	208	221	0.725798	0.0484305	up		LOC_Os10g31950	Chr10	16775000	16775999
Chr12	2264600	2265199	129	152	229	187	257	1.08025	0.00280412	up		LOC_Os08g19890	Chr8	11919800	11921399
Chr12	22650800	22651399	268	230	74	46	80	-1.5767	1.99276e-05	down		LOC_Os01g01369	Chr1	191000	191599
Chr12	2266400	2267199	108	144	225	180	217	1.20138	6.48373e-05	up		LOC_Os01g01380	Chr1	191000	191599
Chr12	2275000	2275999	218	247	307	213	234	0.658575	0.0384637	up		LOC_Os06g08270	Chr6	4005400	4005799
Chr12	22921400	22922599	248	255	336	262	324	0.753032	0.0447085	up		LOC_Os11g39120	Chr11	23284000	23284599
Chr12	2300400	2301799	262	303	444	338	474	0.975876	0.00565422	up		LOC_Os09g24480	Chr9	14566400	14567799
Chr12	2317600	2318199	155	154	211	159	167	0.758961	0.0324145	up		LOC_Os03g28000	Chr3	16087800	16088599
Chr12	23315000	23315399	102	108	183	116	172	0.996895	0.00686713	up		LOC_Os07g29190	Chr7	17089000	17090599
Chr12	2334200	2334999	193	240	271	254	272	0.808311	0.025647	up		LOC_Os12g16250	Chr12	9290600	9291599
Chr12	2343400	2343999	149	106	255	156	174	1.15106	0.0120098	up		LOC_Os01g56710	Chr1	32722400	32723199
Chr12	23774400	23774999	303	340	149	117	204	-0.766177	0.0200639	down		LOC_Os12g17670	Chr12	10119800	10120399
Chr12	2389600	2389999	92	140	204	135	114	1.05285	0.00585365	up		LOC_Os06g47540	Chr6	28777200	28778199
Chr12	23908400	23909599	376	447	209	147	209	-0.707946	0.0248525	down		LOC_Os06g05540	Chr6	2509600	2510799
Chr12	24011600	24012399	358	340	108	80	116	-1.39863	6.35226e-05	down		LOC_Os01g36340	Chr1	20153400	20153999
Chr12	24032600	24033999	447	523	243	167	233	-0.744569	0.0416053	down		LOC_Os01g36350	Chr1	20153400	20153999
Chr12	2403600	2404399	221	224	337	215	253	0.794015	0.0443616	up		LOC_Os02g06610	Chr2	3330200	3331199
Chr12	24042400	24043799	408	478	195	155	240	-0.829392	0.0044835	down		LOC_Os01g63290	Chr1	36691200	36691999
Chr12	24142400	24143799	380	435	536	382	491	0.671523	0.0351767	up		LOC_Os04g54020	Chr4	32201200	32202799
Chr12	2432200	2433199	404	418	210	140	188	-0.742249	0.0215004	down		LOC_Os11g18300	Chr11	10312800	10314399
Chr12	24416600	24417599	198	266	288	224	244	0.657553	0.0467554	up		LOC_Os12g03960	Chr12	1645600	1646399
Chr12	24857200	24857999	169	148	245	182	202	0.92152	0.0122638	up		LOC_Os02g53080	Chr2	32475600	32476199
Chr12	2509800	2510399	94	125	181	162	217	1.17485	0.00134397	up		LOC_Os12g06520	Chr12	3152600	3153999
Chr12	2510800	2512599	346	427	505	431	520	0.797838	0.0139272	up		LOC_Os02g06200	Chr2	3098800	3099399
Chr12	25122800	25123199	61	75	108	96	155	1.10554	0.00302157	up		LOC_Os08g15530	Chr8	9446800	9447999
Chr12	25207000	25207799	231	247	351	250	246	0.827299	0.00498561	up		LOC_Os01g42120	Chr1	23881800	23882199
Chr12	25390600	25391999	460	454	217	175	331	-0.717706	0.0418564	down		LOC_Os05g39630	Chr5	23270800	23271599
Chr12	2543000	2543599	117	129	177	169	202	1.01885	0.0298796	up		LOC_Os11g31690	Chr11	18549000	18549799
Chr12	25493800	25494799	328	375	178	99	173	-0.863906	0.0145026	down		LOC_Os11g04954	Chr11	2123800	2124399
Chr12	26087800	26088399	159	197	254	170	215	0.750265	0.0341454	up		LOC_Os11g04960	Chr11	2123800	2124399
Chr12	26108200	26108799	145	151	233	166	218	0.926884	0.00674747	up		LOC_Os02g28700	Chr2	16971600	16972199
Chr12	26128400	26129399	277	272	348	300	373	0.750329	0.0449207	up		LOC_Os12g30444	Chr12	18272000	18273599
Chr12	26172800	26173599	154	148	231	192	280	0.992753	0.00367918	up		LOC_Os12g30450	Chr12	18272000	18273599
Chr12	26267400	26268199	471	287	166	92	96	-1.11259	0.0497784	down		LOC_Os06g21480	Chr6	12411800	12412199
Chr12	26437800	26438599	331	322	135	90	143	-1.05035	0.00243604	down		LOC_Os11g19450	Chr11	11196400	11196999
Chr12	26540600	26541399	184	179	279	194	269	0.872262	0.0112402	up		LOC_Os12g42730	Chr12	26548200	26549199
Chr12	26548200	26549199	219	274	338	259	364	0.787445	0.029092	up		LOC_Os06g13850	Chr6	7696400	7696999
Chr12	2670600	2671799	304	355	484	333	435	0.80756	0.00530379	up		LOC_Os03g38490	Chr3	21363000	21364199
Chr12	26752000	26752599	148	167	208	152	213	0.694562	0.0467228	up		LOC_Os04g47810	Chr4	28371000	28371799
Chr12	26860400	26860999	142	174	208	177	251	0.804523	0.0329863	up		LOC_Os08g38610	Chr8	24402200	24404199
Chr12	26880000	26880399	101	91	160	116	144	1.01555	0.00971473	up		LOC_Os11g10120	Chr11	5468400	5468999
Chr12	26984800	26985599	182	194	284	172	258	0.760424	0.0298095	up		LOC_Os09g33800	Chr9	19955600	19956399
Chr12	27071600	27072799	279	267	396	299	313	0.844792	0.0204386	up		LOC_Os03g60720	Chr3	34510600	34512399
Chr12	27144000	27144599	170	117	225	178	197	0.975419	0.0426232	up		LOC_Os09g12910	Chr9	7438600	7439999
Chr12	27147800	27148199	202	111	58	38	47	-1.24845	0.0399994	down		LOC_Os03g52090	Chr3	29910400	29911799
Chr12	27230200	27230999	282	317	154	93	125	-0.791372	0.0207387	down		LOC_Os01g16060	Chr1	9044200	9044799
Chr12	27306400	27306999	139	146	244	170	195	1.03327	0.00115483	up		LOC_Os11g29000	Chr11	16782400	16783199
Chr12	27374600	27375599	227	136	305	237	341	1.05451	0.0434713	up		LOC_Os11g12570	Chr11	7064200	7065799
Chr12	2887800	2888799	286	244	433	342	308	1.04383	0.00231919	up		LOC_Os04g37890	Chr4	22532600	22533599
Chr12	2911000	2912399	311	341	426	310	417	0.674751	0.0244913	up		LOC_Os01g72900	Chr1	42281400	42281999
Chr12	2923800	2924399	100	124	170	146	181	1.01623	0.00305828	up		LOC_Os12g35510	Chr12	21597200	21598399
Chr12	294600	295199	138	156	192	164	192	0.791945	0.0287255	up		LOC_Os05g20420	Chr5	11976000	11976999
Chr12	3068800	3069799	213	223	338	261	335	0.961674	0.0125155	up		LOC_Os03g01700	Chr3	432200	432999
Chr12	3137400	3138999	390	433	516	409	453	0.677371	0.019745	up		LOC_Os07g03870	Chr7	1615000	1615999
Chr12	3152600	3153999	313	276	410	314	486	0.791621	0.0354832	up		LOC_Os07g18240	Chr7	10810000	10810799
Chr12	3243600	3244199	101	105	205	153	193	1.29812	8.37557e-06	up		LOC_Os12g14699	Chr12	8413400	8413799
Chr12	3328800	3329999	398	435	195	127	179	-0.880687	0.0040586	down		LOC_Os06g36260	Chr6	21230200	21230799
Chr12	3455600	3456199	141	191	217	169	216	0.733048	0.0401536	up		LOC_Os07g08300	Chr7	4242600	4247399
Chr12	3512200	3512999	286	338	99	61	84	-1.47258	2.94839e-05	down		LOC_Os02g05720	Chr2	2812200	2812999
Chr12	3538600	3539599	294	256	375	288	318	0.763226	0.0429508	up		LOC_Os11g08569	Chr11	4548800	4549399
Chr12	3727400	3728199	217	215	293	229	263	0.774949	0.0369353	up		LOC_Os07g01114	Chr7	67400	67999
Chr12	3798800	3799199	97	78	128	104	109	0.904054	0.0327302	up		LOC_Os05g25620	Chr5	14893200	14893999
Chr12	3820800	3821599	164	212	299	219	329	0.970394	0.00260701	up		LOC_Os03g06170	Chr3	3097400	3098399
Chr12	3862200	3862799	184	156	266	196	219	0.930797	0.0392611	up		LOC_Os03g06180	Chr3	3097400	3098399
Chr12	3997000	3997599	98	144	205	156	166	1.09338	0.000943788	up		LOC_Os12g03580	Chr12	1433000	1433999
Chr12	4134600	4134799	48	47	86	85	60	1.36997	0.00111781	up		LOC_Os03g51640	Chr3	29558200	29558599
Chr12	4139600	4139999	84	63	175	125	118	1.5128	5.53606e-05	up		LOC_Os11g08230	Chr11	4324400	4325399
Chr12	4166000	4166999	297	380	84	55	99	-1.78493	1.34975e-05	down		LOC_Os11g08235	Chr11	4324400	4325399
Chr12	4479200	4479799	155	124	204	156	169	0.858041	0.0371887	up		LOC_Os10g03780	Chr10	1709400	1710199
Chr12	449400	449799	70	117	152	133	128	1.14338	0.00845555	up		LOC_Os08g13640	Chr8	8115600	8116399
Chr12	4563200	4563599	98	118	153	121	114	0.854304	0.017613	up		LOC_Os11g29030	Chr11	16806200	16808999
Chr12	4675600	4675999	111	123	163	127	154	0.816142	0.0176463	up		LOC_Os12g24659	Chr12	14123600	14124399
Chr12	4710600	4710999	87	86	122	95	112	0.829099	0.031738	up		LOC_Os06g45140	Chr6	27301400	27302599
Chr12	4894000	4894799	241	260	313	265	342	0.719948	0.0376856	up		LOC_Os02g56750	Chr2	34795800	34796599
Chr12	4909600	4910399	204	181	244	232	192	0.821885	0.040036	up		LOC_Os02g36810	Chr2	22204000	22204399
Chr12	5125400	5126399	214	217	321	260	338	0.93748	0.0106202	up		LOC_Os10g03770	Chr10	1704000	1704999
Chr12	5146800	5147599	191	222	292	258	263	0.934789	0.00671399	up		LOC_Os05g10380	Chr5	5657200	5658599
Chr12	5189200	5189799	275	279	137	85	97	-0.835578	0.0201216	down		LOC_Os07g43990	Chr7	26299200	26300599
Chr12	519200	520199	314	395	119	79	94	-1.34025	4.43375e-06	down		LOC_Os04g18060	Chr4	9972200	9972799
Chr12	5394200	5394799	118	95	194	167	171	1.26382	0.000693778	up		LOC_Os04g53300	Chr4	31750200	31751399
Chr12	5396800	5397799	213	209	295	250	343	0.878485	0.0245784	up		LOC_Os01g06800	Chr1	3228800	3230199
Chr12	5449400	5450599	409	464	152	93	142	-1.34587	1.4909e-05	down		LOC_Os08g37432	Chr8	23712600	23713199
Chr12	5747200	5747999	145	166	238	166	208	0.875975	0.00478198	up		LOC_Os09g15740	Chr9	9619600	9620399
Chr12	5870400	5871799	306	359	395	348	351	0.681923	0.0373473	up		LOC_Os09g15750	Chr9	9619600	9620399
Chr12	5925200	5925799	143	177	221	179	204	0.837148	0.0153005	up		LOC_Os01g49180	Chr1	28272200	28273199
Chr12	5968800	5969399	200	193	264	186	227	0.68675	0.0478749	up		LOC_Os09g12230	Chr9	6950400	6950799
Chr12	6101200	6101999	171	178	313	220	272	1.10569	9.26172e-05	up		LOC_Os07g35030	Chr7	20984800	20985999
Chr12	6159400	6160199	182	196	262	214	255	0.842507	0.00844956	up		LOC_Os04g49250	Chr4	29391200	29392199
Chr12	6183800	6184799	321	269	397	312	396	0.759024	0.0453445	up		LOC_Os12g07500	Chr12	3727400	3728199
Chr12	6218600	6219199	340	224	94	51	74	-1.51194	0.00273998	down		LOC_Os03g34120	Chr3	19439600	19440999
Chr12	6253800	6254399	121	109	216	141	199	1.11676	0.0011581	up		LOC_Os02g37140	Chr2	22456400	22457599
Chr12	6294600	6295199	122	142	225	146	203	0.983587	0.00424716	up		LOC_Os06g41160	Chr6	24627800	24628599
Chr12	6429400	6429799	108	112	177	133	134	0.995503	0.0135136	up		LOC_Os07g35004	Chr7	20973600	20974999
Chr12	6463800	6464399	179	168	238	201	259	0.846182	0.0248563	up		LOC_Os06g38120	Chr6	22566600	22567199
Chr12	6573000	6573799	296	269	385	282	246	0.730634	0.0399457	up		LOC_Os03g52570	Chr3	30152600	30153799
Chr12	6616200	6616799	267	269	58	38	60	-1.99153	8.23312e-10	down		LOC_Os06g08660	Chr6	4316800	4317599
Chr12	6659000	6659799	328	304	135	93	135	-0.984235	0.0104133	down		LOC_Os07g46090	Chr7	27511800	27512599
Chr12	6720600	6721199	126	130	194	168	192	1.01313	0.00235148	up		LOC_Os11g24640	Chr11	14057200	14057999
Chr12	6726800	6727399	134	113	191	145	145	0.936587	0.0146653	up		LOC_Os12g02589	Chr12	896600	896999
Chr12	6751800	6752399	111	89	218	146	179	1.34307	0.000274546	up		LOC_Os01g05020	Chr1	2361600	2363599
Chr12	675800	676799	268	273	421	309	338	0.929289	0.0064508	up		LOC_Os10g10175	Chr10	5587200	5587999
Chr12	6897600	6898399	256	304	124	104	137	-0.781619	0.0195422	down		LOC_Os05g44960	Chr5	26136000	26136599
Chr12	6949200	6949599	75	46	144	89	116	1.40693	0.00332687	up		LOC_Os04g28260	Chr4	16698400	16699599
Chr12	7044400	7044999	99	92	201	157	170	1.4068	5.62439e-06	up		LOC_Os12g26390	Chr12	15422400	15423599
Chr12	7049800	7050199	125	124	189	151	116	0.953813	0.00448835	up		LOC_Os01g14360	Chr1	8040800	8042199
Chr12	7201600	7202599	221	258	330	231	241	0.727264	0.0300868	up		LOC_Os01g26100	Chr1	14787800	14788399
Chr12	7405400	7406199	234	227	296	233	215	0.700089	0.0485388	up		LOC_Os10g29470	Chr10	15308800	15309399
Chr12	746000	746599	106	145	211	148	174	1.02254	0.00143317	up		LOC_Os08g43370	Chr8	27403800	27404399
Chr12	751400	752199	110	146	281	197	232	1.40563	3.14271e-07	up		LOC_Os11g16590	Chr11	9193400	9194799
Chr12	760800	761399	145	108	211	155	200	1.01579	0.0192953	up		LOC_Os10g32620	Chr10	17087200	17087999
Chr12	7663200	7663999	253	231	334	241	276	0.738891	0.0344932	up		LOC_Os06g44374	Chr6	26784200	26784799
Chr12	7676400	7676799	79	64	174	132	138	1.59034	4.25828e-06	up		LOC_Os05g32620	Chr5	19104600	19105199
Chr12	7891600	7893199	410	370	588	478	555	0.951694	0.00721821	up		LOC_Os01g18370	Chr1	10316000	10316599
Chr12	8056400	8056999	95	134	165	149	172	0.98561	0.00820912	up		LOC_Os05g06814	Chr5	3567400	3568199
Chr12	8155200	8156199	249	282	367	325	373	0.902932	0.00719402	up		LOC_Os02g34910	Chr2	20947000	20948199
Chr12	8193400	8194199	269	193	433	264	265	1.05304	0.025725	up		LOC_Os04g53560	Chr4	31932800	31933199
Chr12	8215200	8215799	196	171	297	189	229	0.881644	0.0186995	up		LOC_Os09g19400	Chr9	11613400	11614999
Chr12	8273200	8274599	350	337	444	360	419	0.730911	0.0371768	up		LOC_Os07g23880	Chr7	13488000	13488999
Chr12	8337600	8338199	189	171	292	199	250	0.932765	0.00706352	up		LOC_Os04g43910	Chr4	26014000	26015599
Chr12	8361400	8362199	166	166	258	206	201	0.987623	0.00168515	up		LOC_Os10g07040	Chr10	3697800	3698799
Chr12	8375400	8377399	465	485	662	506	586	0.800069	0.0356793	up		LOC_Os02g42860	Chr2	25767200	25767999
Chr12	8400000	8401199	310	300	430	352	347	0.863691	0.0180837	up		LOC_Os04g57200	Chr4	34080400	34081799
Chr12	8413400	8413799	85	98	123	98	137	0.782064	0.0480474	up		LOC_Os08g02390	Chr8	953600	954399
Chr12	8441400	8442399	221	250	315	235	299	0.727514	0.0168821	up		LOC_Os01g70060	Chr1	40551800	40552399
Chr12	8446600	8447199	160	165	223	165	212	0.754542	0.0388082	up		LOC_Os05g02940	Chr5	1084800	1085599
Chr12	8767200	8767999	180	170	240	194	251	0.813341	0.0299927	up		LOC_Os09g09500	Chr9	5121000	5122599
Chr12	8771600	8775399	938	1003	1166	939	1230	0.625841	0.0438122	up		LOC_Os01g68130	Chr1	39608200	39609999
Chr12	8778600	8778999	58	84	153	101	140	1.34163	0.00017034	up		LOC_Os01g24940	Chr1	14047800	14048599
Chr12	8957000	8957999	242	205	357	257	394	0.944277	0.0084527	up		LOC_Os05g10360	Chr5	5650400	5650999
Chr12	896600	896999	129	145	184	145	103	0.772348	0.0446414	up		LOC_Os10g13950	Chr10	7582400	7582799
Chr12	9063400	9064599	408	494	235	156	217	-0.708911	0.0206772	down		LOC_Os04g26930	Chr4	15932000	15933799
Chr12	9160600	9161199	161	168	236	207	214	0.94458	0.00666943	up		LOC_Os09g38730	Chr9	22261600	22261999
Chr12	9231000	9231599	139	175	214	152	145	0.725222	0.0302145	up		LOC_Os04g47840	Chr4	28393800	28394599
Chr12	9283200	9283599	119	131	204	135	154	0.931731	0.00701328	up		LOC_Os02g39640	Chr2	23914800	23916199
Chr12	9290600	9291599	209	246	302	250	347	0.794136	0.0108761	up		LOC_Os10g20820	Chr10	10560200	10561999
Chr12	9498600	9499199	167	154	281	200	222	1.07383	0.000864975	up		LOC_Os03g02860	Chr3	1125000	1125599
Chr12	9529600	9529999	105	109	170	112	147	0.888355	0.0122248	up		LOC_Os04g10380	Chr4	5608400	5609799
Chr12	9547000	9547799	213	182	292	243	332	0.93852	0.0404632	up		LOC_Os10g31630	Chr10	16577000	16578599
Chr12	9555000	9555599	147	130	218	204	264	1.12179	0.0030005	up		LOC_Os01g07770	Chr1	3733600	3733999
Chr12	9778000	9779399	328	389	459	351	509	0.684474	0.0276448	up		LOC_Os11g11180	Chr11	6190200	6192199
Chr12	9810200	9811399	251	272	339	263	357	0.708412	0.0237217	up		LOC_Os10g03480	Chr10	1498800	1499399
Chr12	986000	987399	297	265	415	309	446	0.857272	0.0146263	up		LOC_Os06g09110	Chr6	4583200	4584999
Chr12	9887200	9887799	169	112	257	177	200	1.09694	0.0263514	up		LOC_Os12g35850	Chr12	21843800	21845399
Chr12	9938200	9938799	285	251	132	89	95	-0.795582	0.0495664	down		LOC_Os01g71190	Chr1	41188000	41188599
Chr12	9957000	9957599	133	147	210	154	208	0.879886	0.0092494	up		LOC_Os07g09690	Chr7	5154400	5155999
Chr2	10123000	10124399	360	448	513	375	462	0.642726	0.0411548	up		LOC_Os06g04410	Chr6	1892600	1893399
Chr2	10165800	10166599	193	258	374	252	281	0.974911	0.00211504	up		LOC_Os11g07870	Chr11	4033600	4033999
Chr2	10282800	10283799	196	199	323	233	292	0.98883	0.00260319	up		LOC_Os12g07200	Chr12	3538600	3539599
Chr2	10463000	10463199	101	66	21	21	36	-1.49613	0.00859667	down		LOC_Os02g29350	Chr2	17436400	17437199
Chr2	1048400	1049999	354	346	587	447	602	1.06131	0.000915049	up		LOC_Os01g39330	Chr1	22141200	22141999
Chr2	10780200	10780999	204	221	291	238	304	0.826409	0.0208926	up		LOC_Os09g10250	Chr9	5584800	5585999
Chr2	10878800	10879399	155	102	226	167	164	1.09012	0.0187722	up		LOC_Os01g04520	Chr1	2014600	2015799
Chr2	10938000	10938799	170	153	230	200	246	0.920662	0.0246405	up		LOC_Os05g19290	Chr5	11211000	11211599
Chr2	11007400	11007999	185	178	263	205	211	0.867071	0.0117395	up		LOC_Os11g05540	Chr11	2500400	2501199
Chr2	11069400	11069599	44	52	98	69	82	1.29987	0.000640774	up		LOC_Os09g27920	Chr9	16972800	16973999
Chr2	11133200	11133599	114	109	147	128	131	0.812579	0.0401151	up		LOC_Os09g27930	Chr9	16972800	16973999
Chr2	11160000	11161399	295	261	420	304	415	0.869352	0.0196811	up		LOC_Os11g27329	Chr11	15724800	15725399
Chr2	11175600	11176999	388	433	527	390	491	0.661862	0.0230737	up		LOC_Os10g21920	Chr10	11289200	11290399
Chr2	11179800	11180799	319	315	411	303	441	0.667462	0.037813	up		LOC_Os08g25410	Chr8	15461000	15461999
Chr2	11207800	11208199	85	70	116	103	122	1.00472	0.0422838	up		LOC_Os07g26650	Chr7	15375800	15376399
Chr2	11254000	11254799	162	194	243	195	233	0.811877	0.0106604	up		LOC_Os07g26660	Chr7	15375800	15376399
Chr2	11317800	11318599	149	153	295	200	314	1.20361	8.54086e-05	up		LOC_Os12g43500	Chr12	26984800	26985599
Chr2	11385200	11385999	166	190	250	203	264	0.859846	0.0116854	up		LOC_Os12g43510	Chr12	26984800	26985599
Chr2	11471200	11472199	228	301	415	303	340	0.949761	0.00133798	up		LOC_Os11g34624	Chr11	20263400	20264799
Chr2	11587400	11588799	489	567	225	143	192	-1.03042	0.00214828	down		LOC_Os05g29920	Chr5	17315800	17316399
Chr2	11613200	11614199	217	202	284	240	317	0.82918	0.0212028	up		LOC_Os11g24120	Chr11	13708400	13709799
Chr2	11668000	11669799	513	550	705	519	683	0.703044	0.0419814	up		LOC_Os10g19330	Chr10	9859800	9860799
Chr2	11795400	11796399	212	214	344	223	270	0.897518	0.00867201	up		LOC_Os10g19331	Chr10	9859800	9860799
Chr2	12152400	12152999	116	125	181	134	203	0.887224	0.043479	up		LOC_Os11g07260	Chr11	3657400	3658799
Chr2	12244800	12245199	81	121	152	104	110	0.849678	0.0384634	up		LOC_Os12g05220	Chr12	2317600	2318199
Chr2	12309600	12310199	182	158	247	182	197	0.825684	0.035623	up		LOC_Os12g05230	Chr12	2317600	2318199
Chr2	1240600	1242199	381	367	507	384	498	0.749552	0.02722	up		LOC_Os09g39320	Chr9	22607400	22608599
Chr2	12432200	12432799	94	126	186	168	214	1.21427	0.000214856	up		LOC_Os08g34170	Chr8	21419000	21419799
Chr2	12524000	12525399	558	597	309	221	300	-0.626902	0.0386982	down		LOC_Os01g41650	Chr1	23581200	23581999
Chr2	12607200	12607799	139	119	200	141	131	0.888849	0.0220045	up		LOC_Os04g59150	Chr4	35187400	35188599
Chr2	12751400	12752199	166	183	281	218	240	1.02214	0.000417244	up		LOC_Os02g07330	Chr2	3772000	3772799
Chr2	12752600	12754399	498	497	664	479	437	0.694034	0.0227688	up		LOC_Os03g05370	Chr3	2639200	2640399
Chr2	13008000	13008999	331	421	200	130	162	-0.6904	0.0365199	down		LOC_Os05g43280	Chr5	25177200	25177799
Chr2	13178000	13178799	259	326	158	101	148	-0.67893	0.047479	down		LOC_Os07g15440	Chr7	8943400	8943999
Chr2	13319800	13320399	110	130	216	152	179	1.11733	0.000161778	up		LOC_Os08g33430	Chr8	20854600	20855999
Chr2	13342200	13342599	87	127	149	130	127	0.910438	0.0163911	up		LOC_Os01g65440	Chr1	37985000	37985599
Chr2	1343200	1345599	549	636	719	567	814	0.628697	0.0453631	up		LOC_Os09g39960	Chr9	22916400	22918599
Chr2	13471400	13472999	377	336	547	368	313	0.840958	0.0195967	up		LOC_Os09g39970	Chr9	22916400	22918599
Chr2	13623200	13623799	142	119	198	155	92	0.930611	0.0157988	up		LOC_Os03g31320	Chr3	17853400	17854799
Chr2	13638200	13639199	511	477	990	750	487	1.31202	5.32331e-07	up		LOC_Os02g33440	Chr2	19878200	19878999
Chr2	13640000	13640799	295	287	627	457	176	1.39149	5.50635e-08	up		LOC_Os03g22180	Chr3	12718000	12718399
Chr2	13698800	13700399	1023	963	1293	1076	1214	0.759933	0.0255103	up		LOC_Os12g14764	Chr12	8446600	8447199
Chr2	13730400	13731199	366	353	485	402	381	0.809327	0.0112245	up		LOC_Os04g58564	Chr4	34822800	34823199
Chr2	13878200	13878999	258	275	333	258	308	0.653551	0.0377245	up		LOC_Os04g28130	Chr4	16617400	16617799
Chr2	13885800	13886399	140	116	232	165	155	1.1186	0.00231446	up		LOC_Os01g56350	Chr1	32470200	32471399
Chr2	13959200	13959799	124	113	197	148	163	1.03677	0.00681707	up		LOC_Os03g47380	Chr3	26794000	26794799
Chr2	14559800	14560199	123	127	183	145	141	0.897059	0.00814628	up		LOC_Os10g21110	Chr10	10728400	10729199
Chr2	14661400	14661999	134	143	176	163	172	0.812567	0.0449247	up		LOC_Os04g53120	Chr4	31637000	31638399
Chr2	14764600	14765199	122	151	174	146	137	0.747115	0.0444031	up		LOC_Os08g13130	Chr8	7802800	7803199
Chr2	14776800	14777399	123	142	169	151	154	0.792988	0.041975	up		LOC_Os07g36280	Chr7	21693800	21694999
Chr2	14784800	14785399	130	101	185	148	218	1.02068	0.0317096	up		LOC_Os12g37320	Chr12	22921400	22922599
Chr2	14843200	14845199	495	506	618	521	637	0.697431	0.039254	up		LOC_Os10g03830	Chr10	1739600	1741199
Chr2	14932800	14933199	83	102	133	113	143	0.928689	0.0104981	up		LOC_Os01g53900	Chr1	30992200	30992799
Chr2	14984000	14984799	184	215	307	248	324	0.988966	0.00140672	up		LOC_Os05g38350	Chr5	22481000	22482399
Chr2	15054600	15056399	387	424	573	419	477	0.790875	0.00458539	up		LOC_Os03g63300	Chr3	35777000	35777599
Chr2	15276200	15276799	136	174	219	160	127	0.797387	0.0366272	up		LOC_Os03g63310	Chr3	35777000	35777599
Chr2	15284400	15285399	183	216	273	212	296	0.791254	0.0347893	up		LOC_Os07g12380	Chr7	7046400	7047399
Chr2	15363200	15363799	135	125	220	173	233	1.096	0.00208417	up		LOC_Os09g37570	Chr9	21652000	21653999
Chr2	1540800	1541599	231	256	328	248	328	0.746251	0.0206127	up		LOC_Os12g42150	Chr12	26128400	26129399
Chr2	15453400	15453799	88	94	170	98	148	1.03833	0.00576457	up		LOC_Os12g42060	Chr12	26087800	26088399
Chr2	15506800	15507399	129	157	186	144	189	0.716453	0.0385016	up		LOC_Os01g27240	Chr1	15193000	15193799
Chr2	15544800	15545599	297	303	124	87	92	-1.01385	0.0012541	down		LOC_Os09g29570	Chr9	17982600	17983199
Chr2	15571200	15571799	295	279	141	94	111	-0.802735	0.0275367	down		LOC_Os01g64810	Chr1	37617200	37617599
Chr2	15607400	15607999	273	234	108	78	92	-0.959552	0.0151612	down		LOC_Os05g08350	Chr5	4550800	4551999
Chr2	15628200	15628799	200	267	104	83	87	-0.804239	0.0233267	down		LOC_Os05g30220	Chr5	17517800	17518399
Chr2	15629400	15629999	310	283	136	101	108	-0.83062	0.0230211	down		LOC_Os03g31170	Chr3	17748000	17748599
Chr2	15799600	15800799	326	265	465	345	489	0.941133	0.0174321	up		LOC_Os11g08050	Chr11	4184200	4184799
Chr2	16058800	16059799	255	205	319	259	286	0.824728	0.048176	up		LOC_Os06g13560	Chr6	7481400	7481999
Chr2	16299200	16300399	375	360	491	392	393	0.767001	0.0229227	up		LOC_Os04g09390	Chr4	5005200	5006199
Chr2	16459000	16459999	205	251	289	224	276	0.680805	0.0323842	up		LOC_Os04g46560	Chr4	27607200	27607799
Chr2	16853800	16854599	188	188	241	196	257	0.722997	0.0344802	up		LOC_Os03g07070	Chr3	3607000	3607799
Chr2	16907600	16908599	247	315	377	274	280	0.719199	0.0440772	up		LOC_Os08g29570	Chr8	18128800	18130199
Chr2	16971600	16972199	193	237	317	210	237	0.789978	0.020334	up		LOC_Os06g28840	Chr6	16442600	16444599
Chr2	17040000	17040399	107	65	165	114	136	1.16561	0.0335585	up		LOC_Os04g53030	Chr4	31577200	31578799
Chr2	17204200	17204599	79	99	156	109	149	1.07652	0.00129084	up		LOC_Os03g51990	Chr3	29835600	29836799
Chr2	17223000	17224799	432	502	644	521	699	0.832441	0.0170802	up		LOC_Os11g25140	Chr11	14316800	14317399
Chr2	17236400	17237399	306	321	120	123	162	-0.840341	0.032251	down		LOC_Os11g14370	Chr11	8068800	8069399
Chr2	17280400	17282599	571	604	779	567	866	0.693669	0.0482661	up		LOC_Os04g07850	Chr4	4178200	4179199
Chr2	17404600	17404999	92	87	145	105	97	0.97602	0.0155985	up		LOC_Os02g03690	Chr2	1540800	1541599
Chr2	17413400	17413999	123	130	189	133	247	0.843542	0.0325066	up		LOC_Os04g03360	Chr4	1442800	1444199
Chr2	17436400	17437199	192	197	287	184	255	0.761534	0.0245156	up		LOC_Os08g13670	Chr8	8136000	8136999
Chr2	17498800	17500999	546	596	696	582	759	0.676015	0.0361258	up		LOC_Os09g20350	Chr9	12217400	12218199
Chr2	17593200	17594199	270	248	376	273	312	0.816043	0.0295789	up		LOC_Os01g29804	Chr1	16693200	16694199
Chr2	17755000	17755999	287	321	397	285	351	0.665332	0.0272358	up		LOC_Os06g05420	Chr6	2449600	2450399
Chr2	17816800	17818199	553	583	199	144	161	-1.2305	1.66316e-05	down		LOC_Os11g15040	Chr11	8467400	8467999
Chr2	17819000	17820599	533	588	299	216	314	-0.622719	0.0403199	down		LOC_Os11g33440	Chr11	19808200	19808999
Chr2	1784400	1785399	213	184	306	275	364	1.05875	0.00974692	up		LOC_Os04g58480	Chr4	34787200	34788399
Chr2	18034600	18035199	164	127	200	186	171	0.914926	0.0407222	up		LOC_Os11g12480	Chr11	6975400	6976199
Chr2	18128000	18128999	259	208	362	301	332	1.00342	0.0085494	up		LOC_Os07g10250	Chr7	5505600	5506799
Chr2	18187200	18188199	308	335	389	355	436	0.732578	0.0454598	up		LOC_Os07g10254	Chr7	5505600	5506799
Chr2	18329800	18330199	84	97	139	115	134	1.00291	0.0218687	up		LOC_Os01g48660	Chr1	27895800	27897799
Chr2	18461400	18461999	343	525	116	92	180	-1.53689	3.3759e-06	down		LOC_Os04g08828	Chr4	4873600	4874799
Chr2	1847800	1848599	192	220	257	198	244	0.650436	0.0416068	up		LOC_Os06g23740	Chr6	13871000	13871599
Chr2	18608400	18609199	153	172	236	189	254	0.896893	0.00373262	up		LOC_Os02g06250	Chr2	3125800	3126599
Chr2	18684000	18684599	172	115	230	207	146	1.10394	0.0196925	up		LOC_Os11g39079	Chr11	23260600	23261199
Chr2	18778600	18779799	230	204	380	290	358	1.121	0.000375986	up		LOC_Os10g05540	Chr10	2747200	2748399
Chr2	18794000	18794599	179	107	323	251	80	1.48195	0.0018016	up		LOC_Os01g21650	Chr1	12129800	12131199
Chr2	18959400	18960399	358	369	136	107	107	-1.07799	0.000295121	down		LOC_Os03g47580	Chr3	26918800	26919399
Chr2	19020400	19020999	203	237	106	68	124	-0.844169	0.018192	down		LOC_Os03g40690	Chr3	22623000	22624399
Chr2	19495200	19495799	153	162	229	179	240	0.878389	0.0183864	up		LOC_Os12g31290	Chr12	18832600	18833999
Chr2	19547000	19547599	133	134	205	160	206	0.953853	0.0208723	up		LOC_Os03g40250	Chr3	22370800	22371799
Chr2	19580600	19581799	366	444	195	120	205	-0.871547	0.00656417	down		LOC_Os02g52350	Chr2	32046400	32046999
Chr2	19629200	19629599	88	66	150	114	133	1.26669	0.00156701	up		LOC_Os01g08120	Chr1	3928200	3929599
Chr2	19722000	19722799	176	199	274	192	243	0.811461	0.0181622	up		LOC_Os07g14590	Chr7	8322000	8322999
Chr2	19742200	19744399	550	573	695	585	820	0.700763	0.0345185	up		LOC_Os09g10260	Chr9	5587800	5588199
Chr2	19776600	19779999	841	949	1120	844	1052	0.638518	0.0359143	up		LOC_Os01g59940	Chr1	34658600	34659799
Chr2	19801600	19802199	120	93	191	156	122	1.19956	0.00566503	up		LOC_Os07g27430	Chr7	15982400	15983199
Chr2	19806600	19806799	57	60	87	64	49	0.868407	0.0494204	up		LOC_Os01g31850	Chr1	17444800	17445399
Chr2	19878200	19878999	207	227	300	218	245	0.755264	0.0161037	up		LOC_Os10g28830	Chr10	15034800	15036999
Chr2	19886400	19887399	58	68	302	246	122	2.63449	6.22903e-22	up		LOC_Os10g28840	Chr10	15034800	15036999
Chr2	19933000	19933999	201	169	293	217	310	0.951834	0.0151523	up		LOC_Os07g10650	Chr7	5786200	5786799
Chr2	20082000	20082599	163	129	218	160	194	0.858265	0.0357431	up		LOC_Os07g10660	Chr7	5786200	5786799
Chr2	20275200	20275799	135	144	225	167	218	0.99139	0.00547817	up		LOC_Os07g25530	Chr7	14613800	14615599
Chr2	20369600	20369999	167	192	81	69	104	-0.745745	0.0489984	down		LOC_Os09g23520	Chr9	13981600	13983199
Chr2	20392800	20393199	60	65	147	99	144	1.47101	9.94543e-06	up		LOC_Os05g15370	Chr5	8700800	8701599
Chr2	20567400	20568599	297	323	382	308	380	0.663677	0.0362159	up		LOC_Os04g02120	Chr4	694000	695199
Chr2	2092400	2092799	120	105	162	128	152	0.863802	0.0465184	up		LOC_Os12g28100	Chr12	16595400	16596799
Chr2	20947000	20948199	281	313	402	311	412	0.769972	0.00803134	up		LOC_Os01g46010	Chr1	26154400	26155399
Chr2	21040000	21040399	73	83	116	133	151	1.22037	0.0236182	up		LOC_Os12g36710	Chr12	22483800	22485399
Chr2	21094400	21095399	393	338	129	102	136	-1.16762	0.000827449	down		LOC_Os07g39740	Chr7	23815600	23816599
Chr2	21156200	21156599	91	115	172	146	167	1.14565	0.000350427	up		LOC_Os10g05880	Chr10	2967400	2968199
Chr2	21210400	21211999	327	389	509	390	518	0.837369	0.0100536	up		LOC_Os05g44950	Chr5	26130600	26133399
Chr2	21311800	21312999	309	286	449	345	476	0.912878	0.0150393	up		LOC_Os09g29600	Chr9	18007600	18008199
Chr2	21467000	21467799	401	390	109	68	77	-1.67777	2.84768e-08	down		LOC_Os07g12130	Chr7	6779200	6780199
Chr2	215000	216199	336	422	188	123	196	-0.787341	0.0137973	down		LOC_Os01g10800	Chr1	5764800	5765599
Chr2	21515600	21516599	401	417	172	124	170	-0.970126	0.00227113	down		LOC_Os03g04520	Chr3	2103600	2104199
Chr2	21585600	21586199	180	138	266	215	222	1.09031	0.00649725	up		LOC_Os04g54930	Chr4	32676400	32678399
Chr2	21817200	21817799	229	273	96	99	105	-0.831877	0.0352111	down		LOC_Os01g16110	Chr1	9074400	9074799
Chr2	22136800	22137399	123	148	195	162	203	0.913355	0.00506092	up		LOC_Os01g05289	Chr1	2487400	2489199
Chr2	22204000	22204399	89	93	123	97	121	0.778777	0.0440047	up		LOC_Os04g57040	Chr4	33999400	34000599
Chr2	22404000	22404199	40	50	83	49	55	1.04363	0.0172509	up		LOC_Os09g09330	Chr9	4993400	4993999
Chr2	22456400	22457599	368	363	508	378	483	0.774141	0.0134307	up		LOC_Os11g07290	Chr11	3675800	3676599
Chr2	22474800	22475399	157	137	193	183	189	0.869518	0.0365622	up		LOC_Os11g38270	Chr11	22664800	22666599
Chr2	22785400	22786199	181	211	306	211	292	0.897075	0.00965747	up		LOC_Os01g60150	Chr1	34796000	34796999
Chr2	22802800	22803199	96	129	154	111	89	0.743921	0.0430824	up		LOC_Os12g31200	Chr12	18786000	18787399
Chr2	22892200	22892999	144	172	232	175	223	0.872299	0.00881582	up		LOC_Os02g10614	Chr2	5583600	5584399
Chr2	22897800	22899199	288	321	376	315	422	0.696711	0.0439824	up		LOC_Os02g06940	Chr2	3517000	3518399
Chr2	22957800	22962599	1313	1410	1760	1379	1807	0.7113	0.0299039	up		LOC_Os12g07060	Chr12	3455600	3456199
Chr2	22977200	22977599	82	83	131	91	132	0.922229	0.0151612	up		LOC_Os01g68680	Chr1	39891000	39892399
Chr2	23050400	23050999	188	194	275	197	202	0.800936	0.026626	up		LOC_Os06g50300	Chr6	30444000	30444999
Chr2	23109800	23110199	102	104	160	106	166	0.857613	0.047479	up		LOC_Os12g04340	Chr12	1838200	1838999
Chr2	23303000	23304599	644	693	246	165	475	-1.21024	5.56177e-06	down		LOC_Os07g12050	Chr7	6729000	6729799
Chr2	23412000	23412399	82	68	126	102	161	1.10258	0.0112245	up		LOC_Os11g06330	Chr11	3036200	3037999
Chr2	23643000	23643199	45	36	96	61	56	1.43595	0.000539275	up		LOC_Os11g06340	Chr11	3036200	3037999
Chr2	23675200	23676399	306	285	371	314	347	0.719597	0.0452946	up		LOC_Os10g05240	Chr10	2586000	2586599
Chr2	23682600	23684599	398	399	610	470	647	0.93934	0.00226358	up		LOC_Os01g72530	Chr1	42074400	42075399
Chr2	23688400	23690599	494	548	677	493	760	0.667479	0.0277738	up		LOC_Os08g21890	Chr8	13113800	13114199
Chr2	23743200	23743799	93	135	241	164	187	1.33524	0.00172781	up		LOC_Os08g34660	Chr8	21772600	21773799
Chr2	23914800	23916199	343	397	508	379	327	0.766321	0.00575539	up		LOC_Os09g37090	Chr9	21389800	21390599
Chr2	23948600	23949199	172	145	255	200	187	1.01629	0.00917105	up		LOC_Os11g14690	Chr11	8272400	8274199
Chr2	24012400	24013799	472	487	150	127	172	-1.28247	4.39754e-06	down		LOC_Os05g46020	Chr5	26682400	26683999
Chr2	24188000	24188999	262	340	130	92	159	-0.933113	0.00425701	down		LOC_Os03g15430	Chr3	8442200	8443399
Chr2	24228600	24229399	215	240	319	245	302	0.815818	0.0253616	up		LOC_Os10g10400	Chr10	5714400	5715399
Chr2	24267200	24267799	89	61	202	175	121	1.82686	7.07242e-06	up		LOC_Os01g40250	Chr1	22709400	22710199
Chr2	24273000	24274199	242	224	427	337	355	1.21307	7.35175e-05	up		LOC_Os03g38320	Chr3	21265600	21266599
Chr2	24278400	24278999	33	44	197	151	83	2.68896	4.34523e-11	up		LOC_Os03g21950	Chr3	12551400	12552199
Chr2	24283800	24285199	189	188	495	342	393	1.64052	2.25979e-07	up		LOC_Os05g49630	Chr5	28476800	28477199
Chr2	24289000	24289999	4	5	330	232	3	6.46453	1.51275e-28	up		LOC_Os07g28940	Chr7	16983000	16983399
Chr2	24299400	24302399	0	0	932	794	0	12.7113	3.01728e-15	up		LOC_Os08g08060	Chr8	4571400	4571999
Chr2	24321200	24322199	3	1	396	288	1	7.91696	7.93776e-22	up		LOC_Os03g06530	Chr3	3288400	3289199
Chr2	24331200	24332799	0	0	499	334	0	11.6348	1.02439e-12	up		LOC_Os05g09724	Chr5	5508600	5509199
Chr2	24340000	24340799	0	0	288	212	0	10.9081	3.98409e-11	up		LOC_Os03g09810	Chr3	4876400	4877399
Chr2	24343600	24344199	7	1	193	140	4	5.8698	1.63851e-20	up		LOC_Os12g13000	Chr12	7201600	7202599
Chr2	24350000	24351399	70	83	364	300	103	2.63321	6.92204e-23	up		LOC_Os02g47390	Chr2	28928400	28931399
Chr2	24360200	24361599	0	0	559	406	0	11.8554	3.02557e-13	up		LOC_Os09g39690	Chr9	22773600	22774199
Chr2	24363800	24364399	0	0	206	153	0	10.431	3.69287e-10	up		LOC_Os05g03060	Chr5	1194800	1195599
Chr2	24372800	24373799	7	7	314	258	1	5.86599	2.45426e-32	up		LOC_Os05g07070	Chr5	3724800	3725799
Chr2	24374600	24375399	0	0	365	294	0	11.3156	5.42244e-12	up		LOC_Os12g36820	Chr12	22577800	22578399
Chr2	24378600	24379199	0	0	190	160	0	10.4063	4.31575e-10	up		LOC_Os08g28700	Chr8	17537600	17538999
Chr2	24379600	24380599	0	0	274	244	0	10.9783	3.21762e-11	up		LOC_Os12g16160	Chr12	9231000	9231599
Chr2	24387400	24388599	0	0	338	295	0	11.2658	7.4772e-12	up		LOC_Os04g58100	Chr4	34604200	34604999
Chr2	24393600	24394199	0	0	183	182	0	10.4837	3.73455e-10	up		LOC_Os05g10750	Chr5	5923800	5924999
Chr2	24397400	24398999	0	1	551	433	0	10.4519	1.30413e-10	up		LOC_Os04g23849	Chr4	13620200	13620999
Chr2	24399800	24403199	0	0	1178	965	0	13.0193	4.79319e-16	up		LOC_Os12g24800	Chr12	14233200	14234799
Chr2	24405200	24405999	0	0	249	192	0	10.7315	9.36527e-11	up		LOC_Os11g41260	Chr11	24733600	24734399
Chr2	24414000	24414399	0	0	107	81	0	9.49926	2.18543e-08	up		LOC_Os08g13630	Chr8	8103600	8105999
Chr2	24431800	24432199	0	0	147	127	0	10.0551	2.11808e-09	up		LOC_Os01g11850	Chr1	6409800	6411399
Chr2	24441400	24441799	46	36	122	87	45	1.83829	1.5766e-06	up		LOC_Os05g35810	Chr5	21247400	21248199
Chr2	24450000	24451199	90	71	351	303	127	2.52636	4.95317e-15	up		LOC_Os05g38630	Chr5	22652000	22652799
Chr2	24464600	24465999	0	0	375	281	0	11.3017	5.62194e-12	up		LOC_Os09g21410	Chr9	12932400	12933399
Chr2	24479000	24480399	164	147	471	333	380	1.85828	8.91478e-11	up		LOC_Os09g28320	Chr9	17196200	17197399
Chr2	24515800	24518199	423	429	712	588	697	1.11837	0.000399382	up		LOC_Os12g09320	Chr12	4894000	4894799
Chr2	24529400	24530999	269	286	530	388	486	1.22509	9.00309e-07	up		LOC_Os03g47300	Chr3	26755600	26756199
Chr2	24568200	24569999	139	122	562	399	204	2.36802	9.13992e-16	up		LOC_Os06g22460	Chr6	13057000	13057999
Chr2	24579800	24580199	100	97	149	128	109	1.0016	0.0087882	up		LOC_Os02g39190	Chr2	23675200	23676399
Chr2	24700800	24701999	231	178	400	326	294	1.32181	0.000510544	up		LOC_Os04g48280	Chr4	28756400	28758399
Chr2	24705400	24705999	264	276	137	88	114	-0.774761	0.026051	down		LOC_Os02g28570	Chr2	16907600	16908599
Chr2	24723000	24725399	535	540	749	622	781	0.859886	0.00577594	up		LOC_Os04g40720	Chr4	24168400	24168999
Chr2	24846600	24847599	207	242	328	245	296	0.857251	0.00326855	up		LOC_Os06g35300	Chr6	20582000	20582999
Chr2	24869200	24869599	109	121	159	127	159	0.823184	0.0220557	up		LOC_Os05g12180	Chr5	6975800	6976799
Chr2	25038200	25039799	401	436	538	422	528	0.704623	0.0284285	up		LOC_Os06g30901	Chr6	17970200	17970799
Chr2	25327200	25328199	230	217	314	242	333	0.813157	0.0169487	up		LOC_Os06g50990	Chr6	30858000	30859999
Chr2	25376400	25378399	392	462	558	425	527	0.710811	0.0121719	up		LOC_Os04g59624	Chr4	35459200	35459799
Chr2	25448600	25449799	236	256	387	271	367	0.915181	0.00317783	up		LOC_Os03g08670	Chr3	4467600	4468799
Chr2	25613400	25614199	150	196	246	202	240	0.892055	0.0107427	up		LOC_Os10g02000	Chr10	631400	633399
Chr2	25638000	25638799	168	175	245	191	195	0.850307	0.00867041	up		LOC_Os07g02440	Chr7	837800	838599
Chr2	25639200	25640399	274	273	405	302	370	0.867905	0.0036927	up		LOC_Os01g27570	Chr1	15385000	15385799
Chr2	25767200	25767999	212	253	329	231	284	0.768787	0.0225497	up		LOC_Os12g03980	Chr12	1651800	1652399
Chr2	25852600	25853199	299	281	108	103	129	-0.944113	0.014529	down		LOC_Os02g26400	Chr2	15506800	15507399
Chr2	25889000	25889799	183	182	252	184	217	0.75258	0.0247975	up		LOC_Os01g23680	Chr1	13323000	13323999
Chr2	25965400	25965999	171	193	230	184	232	0.695609	0.0388548	up		LOC_Os04g23040	Chr4	13088600	13089199
Chr2	26113800	26114399	164	156	205	172	205	0.743216	0.0494461	up		LOC_Os10g03730	Chr10	1683200	1684199
Chr2	26123800	26123999	44	18	62	62	56	1.49288	0.0235711	up		LOC_Os05g27160	Chr5	15801800	15803199
Chr2	26533200	26534199	299	312	415	318	352	0.765041	0.0422381	up		LOC_Os04g18130	Chr4	10023600	10025399
Chr2	26577800	26578599	185	186	290	189	232	0.854179	0.0193903	up		LOC_Os10g41920	Chr10	22552200	22552799
Chr2	26582400	26582799	117	113	152	129	130	0.797257	0.0375295	up		LOC_Os10g30944	Chr10	16142200	16143199
Chr2	26733600	26733999	226	174	71	62	46	-1.09167	0.015524	down		LOC_Os03g21440	Chr3	12255800	12256799
Chr2	26759400	26760199	178	204	304	246	305	1.03832	0.00443817	up		LOC_Os08g37380	Chr8	23627800	23628999
Chr2	26793600	26794199	138	145	221	160	226	0.926837	0.0108874	up		LOC_Os08g34520	Chr8	21665800	21666599
Chr2	26924800	26928199	873	1083	1253	989	1360	0.711591	0.0243808	up		LOC_Os10g35920	Chr10	19193600	19194199
Chr2	2698200	2699599	375	430	485	400	553	0.651111	0.0400948	up		LOC_Os09g19270	Chr9	11517400	11518799
Chr2	27055000	27056199	265	323	397	281	408	0.707821	0.0220193	up		LOC_Os01g01570	Chr1	288200	290199
Chr2	27269400	27271199	642	649	280	175	230	-1.02348	0.00218841	down		LOC_Os07g05930	Chr7	2857600	2858599
Chr2	27379000	27379799	169	129	277	201	150	1.164	0.00558938	up		LOC_Os07g42270	Chr7	25293400	25296199
Chr2	27467000	27467399	103	111	140	118	99	0.781653	0.0340705	up		LOC_Os01g19150	Chr1	10822200	10822999
Chr2	27477800	27478399	114	111	206	158	191	1.19436	0.000134038	up		LOC_Os01g19160	Chr1	10822200	10822999
Chr2	28038000	28039599	457	550	132	81	136	-1.75063	4.20249e-08	down		LOC_Os07g48420	Chr7	28959800	28960999
Chr2	28115200	28116399	398	458	229	157	199	-0.651717	0.0345187	down		LOC_Os02g44490	Chr2	26924800	26928199
Chr2	28120800	28121399	163	197	243	171	207	0.703235	0.0296583	up		LOC_Os10g10798	Chr10	5976400	5978799
Chr2	2812200	2812999	212	253	324	239	366	0.781188	0.0299039	up		LOC_Os02g42190	Chr2	25376400	25378399
Chr2	2824800	2825199	69	77	145	109	137	1.303	0.00012776	up		LOC_Os02g13520	Chr2	7248000	7248599
Chr2	28308800	28309799	352	347	448	332	379	0.654512	0.0425215	up		LOC_Os03g07940	Chr3	4059600	4060399
Chr2	28396800	28397399	168	186	81	45	88	-1.00667	0.00706248	down		LOC_Os12g17140	Chr12	9810200	9811399
Chr2	28735200	28735999	306	307	160	79	121	-0.896239	0.0293766	down		LOC_Os02g44642	Chr2	27055000	27056199
Chr2	28854400	28854999	152	179	235	169	190	0.789841	0.021241	up		LOC_Os09g20410	Chr9	12280200	12280799
Chr2	28862000	28862399	92	94	164	114	129	1.07331	0.00583931	up		LOC_Os07g21960	Chr7	12282400	12283199
Chr2	28928400	28931399	682	836	1013	754	1020	0.726896	0.0156351	up		LOC_Os11g27220	Chr11	15665600	15666999
Chr2	28939000	28939399	79	121	153	104	161	0.870244	0.0441536	up		LOC_Os11g18470	Chr11	10416600	10418199
Chr2	29131600	29131999	159	187	48	38	40	-1.50026	6.3733e-06	down		LOC_Os08g17680	Chr8	10812800	10814799
Chr2	29253400	29254199	330	340	129	112	134	-0.963827	0.00499684	down		LOC_Os10g22484	Chr10	11652000	11653199
Chr2	29315400	29316199	268	309	132	72	100	-1.0209	0.00904106	down		LOC_Os03g60690	Chr3	34495200	34496599
Chr2	29317000	29317799	226	270	319	235	280	0.664694	0.0336351	up		LOC_Os03g21300	Chr3	12184000	12185599
Chr2	29363000	29363599	157	126	241	194	225	1.11509	0.0141981	up		LOC_Os03g22030	Chr3	12624600	12625999
Chr2	29512600	29514199	515	587	179	133	185	-1.31696	3.32193e-06	down		LOC_Os02g49880	Chr2	30474200	30475999
Chr2	29578400	29578999	128	147	189	159	188	0.854568	0.0115648	up		LOC_Os01g71430	Chr1	41389600	41390199
Chr2	29664200	29664799	126	131	245	171	219	1.1887	0.000829451	up		LOC_Os08g13360	Chr8	7951400	7951999
Chr2	29759600	29760199	145	156	182	165	173	0.724059	0.0472652	up		LOC_Os02g48870	Chr2	29892800	29893999
Chr2	29810600	29811199	173	172	67	55	85	-0.995814	0.0107656	down		LOC_Os01g23080	Chr1	12989400	12990199
Chr2	29892800	29893999	462	507	632	481	571	0.704132	0.0391098	up		LOC_Os11g43710	Chr11	26394600	26395799
Chr2	29919600	29920399	179	173	301	201	273	0.997923	0.00626209	up		LOC_Os03g52594	Chr3	30161800	30166599
Chr2	30025000	30026199	266	278	342	263	354	0.656229	0.0389937	up		LOC_Os05g14210	Chr5	7967800	7968599
Chr2	30308600	30309199	188	208	244	205	243	0.694919	0.0460521	up		LOC_Os02g19850	Chr2	11668000	11669799
Chr2	30402000	30404199	956	965	451	331	410	-0.80069	0.00773525	down		LOC_Os02g19860	Chr2	11668000	11669799
Chr2	30474200	30475999	447	530	654	470	654	0.704613	0.0188828	up		LOC_Os01g57073	Chr1	32965200	32965999
Chr2	30554800	30556599	359	482	645	465	663	0.909365	0.00301258	up		LOC_Os07g11739	Chr7	6499200	6500599
Chr2	30937200	30938599	426	378	550	431	427	0.783288	0.0431605	up		LOC_Os05g14310	Chr5	8047000	8047799
Chr2	30957200	30958599	278	360	425	335	447	0.768038	0.00944045	up		LOC_Os04g46700	Chr4	27690800	27692199
Chr2	30985200	30985799	215	204	92	76	110	-0.815618	0.0409784	down		LOC_Os04g17660	Chr4	9674000	9674799
Chr2	3098800	3099399	160	188	255	172	250	0.791542	0.0231008	up		LOC_Os10g25300	Chr10	13083800	13084399
Chr2	31182800	31184199	437	521	152	109	122	-1.37305	1.70281e-06	down		LOC_Os11g03050	Chr11	1076200	1077199
Chr2	31220400	31220999	188	131	297	207	264	1.13323	0.0120368	up		LOC_Os02g09710	Chr2	4985000	4985999
Chr2	3125800	3126599	172	215	232	217	220	0.743944	0.0387542	up		LOC_Os10g03550	Chr10	1535000	1535999
Chr2	31299600	31299999	115	130	172	138	184	0.849723	0.0255604	up		LOC_Os03g47550	Chr3	26888600	26889599
Chr2	3130600	3131399	180	164	233	194	206	0.815972	0.0295861	up		LOC_Os05g12240	Chr5	7004000	7004999
Chr2	31569800	31570799	266	329	364	277	305	0.617275	0.0439824	up		LOC_Os10g09200	Chr10	4966200	4967799
Chr2	31644600	31645199	136	147	191	151	168	0.780086	0.0210732	up		LOC_Os01g57050	Chr1	32948000	32949199
Chr2	31823400	31823799	97	108	136	142	109	0.972768	0.0162371	up		LOC_Os10g34280	Chr10	18288000	18288799
Chr2	31940600	31941799	307	343	419	303	411	0.651705	0.0480302	up		LOC_Os04g24250	Chr4	13894200	13896399
Chr2	31974000	31975599	545	657	246	189	193	-0.95673	0.00241313	down		LOC_Os02g02400	Chr2	825800	827999
Chr2	32046400	32046999	163	164	226	162	197	0.741959	0.0306933	up		LOC_Os01g67610	Chr1	39302800	39303799
Chr2	32207800	32208199	164	120	62	26	29	-1.25126	0.0273627	down		LOC_Os01g63290	Chr1	36694600	36695399
Chr2	32444000	32444599	112	110	235	158	155	1.31294	1.65694e-05	up		LOC_Os01g32980	Chr1	18110200	18111199
Chr2	32475600	32476199	157	141	217	151	235	0.791695	0.0338193	up		LOC_Os05g02480	Chr5	849000	850199
Chr2	32557600	32557999	126	145	180	129	159	0.690536	0.0470362	up		LOC_Os01g53010	Chr1	30467800	30468399
Chr2	33008400	33009399	244	231	349	280	383	0.907406	0.0170768	up		LOC_Os01g52740	Chr1	30340200	30340999
Chr2	33102000	33102999	180	201	398	302	298	1.38254	3.43097e-08	up		LOC_Os02g49580	Chr2	30308600	30309199
Chr2	33107600	33108599	245	213	368	308	312	1.06413	0.00423445	up		LOC_Os12g43070	Chr12	26752000	26752599
Chr2	33153200	33153799	178	201	284	191	257	0.819521	0.0360412	up		LOC_Os11g39310	Chr11	23406400	23407599
Chr2	33179000	33182199	696	839	931	745	889	0.641219	0.0372888	up		LOC_Os07g10770	Chr7	5857400	5858199
Chr2	3330200	3331199	286	286	413	291	281	0.791963	0.0102979	up		LOC_Os02g21500	Chr2	12752600	12754399
Chr2	33357600	33359799	493	530	753	639	871	0.959098	0.0114448	up		LOC_Os07g14080	Chr7	8034800	8035399
Chr2	33686400	33687799	499	532	238	169	216	-0.844813	0.00699737	down		LOC_Os10g24080	Chr10	12337400	12338199
Chr2	33729400	33729799	105	103	197	110	132	1.03331	0.0122982	up		LOC_Os02g29160	Chr2	17280400	17282599
Chr2	33923800	33924599	196	240	282	237	301	0.769828	0.0150736	up		LOC_Os08g40630	Chr8	25720800	25722799
Chr2	33926400	33926799	85	106	120	112	131	0.807215	0.0495216	up		LOC_Os04g30720	Chr4	18366200	18367199
Chr2	3400400	3401999	314	361	449	330	462	0.709876	0.0137973	up		LOC_Os01g05160	Chr1	2419400	2420599
Chr2	34067200	34067799	109	113	192	150	156	1.12786	0.000802119	up		LOC_Os08g24310	Chr8	14673000	14673599
Chr2	34214600	34214999	107	97	140	115	160	0.824898	0.035895	up		LOC_Os03g33590	Chr3	19203600	19204799
Chr2	34630000	34630399	249	137	43	29	47	-1.96371	0.000360351	down		LOC_Os07g22710	Chr7	12802800	12803799
Chr2	34755800	34756799	220	230	338	261	318	0.916035	0.00731203	up		LOC_Os01g11730	Chr1	6340800	6341399
Chr2	34791000	34791599	125	121	199	152	167	1.01234	0.00232599	up		LOC_Os10g09860	Chr10	5334800	5336399
Chr2	34793800	34794599	157	156	246	211	240	1.05726	0.00234637	up		LOC_Os11g27630	Chr11	15910400	15911199
Chr2	34795800	34796599	161	185	224	191	233	0.779058	0.0262629	up		LOC_Os04g53080	Chr4	31612800	31613799
Chr2	34866400	34867999	490	534	264	181	218	-0.708457	0.0431467	down		LOC_Os10g39932	Chr10	21373600	21374999
Chr2	3517000	3518399	288	325	434	290	373	0.733234	0.0173377	up		LOC_Os10g01660	Chr10	435800	436599
Chr2	35568000	35569199	476	542	229	173	273	-0.835515	0.00337518	down		LOC_Os07g28160	Chr7	16441200	16441999
Chr2	35713400	35713799	91	99	136	112	115	0.895	0.0232139	up		LOC_Os02g53180	Chr2	32557600	32557999
Chr2	3575200	3576799	614	521	264	187	261	-0.848091	0.0258531	down		LOC_Os09g08950	Chr9	4758400	4759199
Chr2	35756600	35757399	239	275	92	45	74	-1.43486	0.000257445	down		LOC_Os11g09510	Chr11	5098400	5100199
Chr2	3591400	3592399	568	394	146	91	136	-1.56038	0.000319881	down		LOC_Os08g32840	Chr8	20349800	20350599
Chr2	3634200	3635199	165	154	258	239	231	1.15571	0.000894063	up		LOC_Os02g16220	Chr2	9220600	9221999
Chr2	3772000	3772799	232	240	312	250	295	0.75815	0.0219873	up		LOC_Os07g05120	Chr7	2260200	2261799
Chr2	3910400	3910799	84	67	113	117	103	1.12605	0.0133085	up		LOC_Os07g07150	Chr7	3541000	3542199
Chr2	3947400	3947999	197	211	301	189	204	0.749743	0.02669	up		LOC_Os01g01500	Chr1	258400	259799
Chr2	4088400	4088999	169	131	231	174	205	0.919736	0.0367221	up		LOC_Os12g11060	Chr12	5968800	5969399
Chr2	4229600	4230199	299	250	86	72	113	-1.29955	0.000614592	down		LOC_Os06g33520	Chr6	19523200	19524799
Chr2	4268400	4268799	81	74	148	100	158	1.16509	0.0031044	up		LOC_Os12g17080	Chr12	9778000	9779399
Chr2	4309600	4310199	172	169	237	194	189	0.843961	0.019167	up		LOC_Os09g16500	Chr9	10105000	10105999
Chr2	44200	44799	122	128	196	178	259	1.09966	0.00100041	up		LOC_Os03g37411	Chr3	20727600	20728799
Chr2	4882000	4882799	187	201	238	226	236	0.782441	0.035159	up		LOC_Os01g20120	Chr1	11430200	11431799
Chr2	4906800	4907399	192	184	244	230	175	0.852745	0.0281818	up		LOC_Os09g27690	Chr9	16851000	16851999
Chr2	4985000	4985999	200	210	253	214	224	0.699814	0.0459062	up		LOC_Os05g11860	Chr5	6762000	6762599
Chr2	4997400	4997799	111	95	167	115	113	0.937868	0.023013	up		LOC_Os01g51680	Chr1	29717600	29718399
Chr2	5583600	5584399	228	256	352	222	310	0.733695	0.0297132	up		LOC_Os08g29124	Chr8	17837600	17839199
Chr2	5778800	5779799	212	230	325	233	238	0.834455	0.00635901	up		LOC_Os09g39320	Chr9	22599800	22601199
Chr2	595000	595999	250	215	335	249	300	0.818619	0.0394687	up		LOC_Os08g40740	Chr8	25778600	25779599
Chr2	5999600	6000199	139	153	174	174	213	0.782564	0.0454371	up		LOC_Os01g34330	Chr1	18934200	18937399
Chr2	610800	611599	183	188	306	247	324	1.08285	0.000514541	up		LOC_Os07g36330	Chr7	21725200	21727599
Chr2	6218000	6219199	306	339	443	353	434	0.812724	0.00774392	up		LOC_Os05g37450	Chr5	21916000	21917399
Chr2	6299200	6300199	301	309	407	309	370	0.73183	0.0414022	up		LOC_Os06g10760	Chr6	5618000	5619399
Chr2	6300600	6303999	983	987	1344	1084	1197	0.807234	0.0253544	up		LOC_Os08g43400	Chr8	27441600	27442399
Chr2	6304400	6305399	303	345	535	429	383	1.08444	8.79333e-05	up		LOC_Os06g11730	Chr6	6214800	6215999
Chr2	6306400	6306799	91	79	134	110	109	1.02283	0.0125954	up		LOC_Os06g19170	Chr6	10912600	10913399
Chr2	6307200	6308399	257	248	410	290	342	0.962056	0.00228228	up		LOC_Os12g06500	Chr12	3137400	3138999
Chr2	6366000	6369999	1162	1301	1610	1234	1468	0.713589	0.0157276	up		LOC_Os03g46550	Chr3	26337800	26338599
Chr2	6447000	6447599	149	136	195	180	235	0.909982	0.0194832	up		LOC_Os06g30430	Chr6	17584600	17585399
Chr2	6503600	6503999	71	59	150	106	150	1.46568	4.82903e-05	up		LOC_Os02g29464	Chr2	17498800	17500999
Chr2	6669400	6670599	374	417	203	146	225	-0.680701	0.035272	down		LOC_Os08g35650	Chr8	22475000	22476199
Chr2	678800	679399	118	165	229	166	214	0.99152	0.00477962	up		LOC_Os12g06160	Chr12	2911000	2912399
Chr2	6928400	6928999	114	155	216	160	225	0.993947	0.00180682	up		LOC_Os12g39210	Chr12	24142400	24143799
Chr2	7062800	7063399	155	97	250	174	248	1.21923	0.0120275	up		LOC_Os08g32290	Chr8	20005600	20006799
Chr2	7156800	7157599	157	144	210	161	246	0.798708	0.0270955	up		LOC_Os01g08560	Chr1	4254400	4255399
Chr2	7172600	7172799	42	47	103	76	55	1.51091	0.000174982	up		LOC_Os05g38190	Chr5	22398000	22399199
Chr2	7221000	7223199	563	561	764	624	891	0.810949	0.0235112	up		LOC_Os07g15920	Chr7	9249600	9250399
Chr2	7248000	7248599	178	175	225	182	224	0.710185	0.0458007	up		LOC_Os02g19170	Chr2	11179800	11180799
Chr2	7365200	7365599	87	72	158	109	174	1.23009	0.0161003	up		LOC_Os06g40180	Chr6	23920800	23924199
Chr2	7574000	7574799	242	199	344	229	327	0.85466	0.0314534	up		LOC_Os11g20040	Chr11	11539200	11540799
Chr2	7603800	7604999	410	467	229	156	216	-0.691608	0.0295221	down		LOC_Os02g29860	Chr2	17755000	17755999
Chr2	7654800	7655599	224	238	374	245	316	0.910652	0.00309929	up		LOC_Os01g02110	Chr1	604800	605599
Chr2	774600	775199	180	161	235	189	243	0.814375	0.0262307	up		LOC_Os08g15630	Chr8	9492400	9494799
Chr2	7885000	7885599	170	159	237	191	172	0.881855	0.0203372	up		LOC_Os07g07290	Chr7	3618400	3620199
Chr2	7890600	7892399	459	454	571	462	568	0.683296	0.0347872	up		LOC_Os07g40974	Chr7	24515200	24516399
Chr2	8099000	8099799	223	299	64	58	58	-1.56981	0.000116733	down		LOC_Os04g17064	Chr4	9357600	9359799
Chr2	8147000	8147399	143	130	206	159	123	0.915884	0.0333452	up		LOC_Os01g26310	Chr1	14915000	14915799
Chr2	8213200	8213799	137	116	196	155	189	0.968821	0.0109323	up		LOC_Os05g01060	Chr5	82400	83599
Chr2	825800	827999	578	649	758	633	815	0.696079	0.0299226	up		LOC_Os04g05460	Chr4	2750800	2752199
Chr2	82600	82999	106	99	135	117	141	0.806541	0.0475459	up		LOC_Os08g15740	Chr8	9549200	9550199
Chr2	8470200	8471599	355	405	464	377	422	0.658664	0.0306144	up		LOC_Os01g05650	Chr1	2694600	2695399
Chr2	8558800	8559199	93	90	131	127	132	1.01594	0.0104944	up		LOC_Os02g19160	Chr2	11175600	11176999
Chr2	8645000	8645599	245	259	97	90	92	-0.912856	0.0177199	down		LOC_Os01g32090	Chr1	17567400	17568599
Chr2	8693600	8694999	419	486	202	160	175	-0.812008	0.007583	down		LOC_Os04g13010	Chr4	7177600	7178799
Chr2	9220600	9221999	352	428	489	391	499	0.688461	0.0456767	up		LOC_Os06g41800	Chr6	25069800	25070999
Chr2	9280400	9281599	274	218	416	304	360	1.03337	0.0089363	up		LOC_Os04g45060	Chr4	26659200	26662199
Chr2	9495000	9495599	151	156	233	175	251	0.910498	0.0318735	up		LOC_Os01g44069	Chr1	25263000	25264799
Chr2	9564000	9565399	444	489	208	143	208	-0.915263	0.00323174	down		LOC_Os04g56250	Chr4	33534600	33535799
Chr2	95800	96599	134	105	274	194	268	1.4519	4.33396e-05	up		LOC_Os10g24030	Chr10	12311400	12312799
Chr2	9592200	9594799	832	953	312	224	305	-1.23499	9.84267e-06	down		LOC_Os03g07650	Chr3	3889400	3890799
Chr2	9721600	9721999	105	64	133	116	133	1.05016	0.0475459	up		LOC_Os10g22580	Chr10	11717400	11718599
Chr2	9760400	9761399	311	363	90	75	98	-1.51716	7.15555e-07	down		LOC_Os03g63810	Chr3	36039000	36039999
Chr2	9810200	9811799	496	591	263	190	230	-0.759403	0.0167387	down		LOC_Os10g01110	Chr10	102200	103399
Chr3	10131600	10132999	318	318	408	384	459	0.837919	0.0432186	up		LOC_Os08g17784	Chr8	10906400	10907399
Chr3	10187800	10188799	307	351	176	111	187	-0.706652	0.0392485	down		LOC_Os04g44730	Chr4	26498800	26499799
Chr3	10233400	10234599	319	282	472	338	467	0.917636	0.0158006	up		LOC_Os11g47820	Chr11	28839000	28841199
Chr3	10356800	10357599	169	178	221	204	298	0.812982	0.0265062	up		LOC_Os02g49090	Chr2	30025000	30026199
Chr3	10536400	10536999	162	139	248	163	219	0.92821	0.0235789	up		LOC_Os05g30680	Chr5	17765800	17767199
Chr3	10724600	10725399	245	236	346	238	312	0.768444	0.0206695	up		LOC_Os01g39760	Chr1	22416600	22417999
Chr3	10913600	10914199	136	137	187	168	203	0.894508	0.0137683	up		LOC_Os12g27090	Chr12	15865000	15866199
Chr3	11104400	11104999	135	123	232	183	207	1.18557	0.000205044	up		LOC_Os06g23750	Chr6	13876600	13878199
Chr3	1125000	1125599	193	174	257	187	208	0.765601	0.044703	up		LOC_Os01g56810	Chr1	32791400	32793399
Chr3	11363400	11363799	267	200	85	60	53	-1.20942	0.00874592	down		LOC_Os10g28440	Chr10	14798000	14799399
Chr3	11571400	11571799	123	101	149	141	120	0.884062	0.0423811	up		LOC_Os07g34270	Chr7	20515800	20516599
Chr3	11641800	11642199	44	32	157	111	72	2.30387	2.51193e-10	up		LOC_Os09g21770	Chr9	13180800	13182199
Chr3	11699800	11700199	117	81	169	133	172	1.09564	0.0240613	up		LOC_Os04g07190	Chr4	3817400	3818999
Chr3	11751000	11751399	88	70	136	99	174	1.06017	0.0134211	up		LOC_Os01g60800	Chr1	35156000	35157399
Chr3	11780000	11781199	240	298	415	304	363	0.924924	0.00447179	up		LOC_Os06g09030	Chr6	4546400	4548199
Chr3	11974600	11976799	533	506	829	528	764	0.863238	0.0183384	up		LOC_Os12g03750	Chr12	1525600	1526799
Chr3	12016000	12017399	314	351	509	381	500	0.923993	0.00496639	up		LOC_Os02g04210	Chr2	1847800	1848599
Chr3	12145400	12146199	165	173	238	189	280	0.843408	0.0265389	up		LOC_Os06g50910	Chr6	30814600	30815999
Chr3	12184000	12185599	431	461	570	453	568	0.705009	0.0261823	up		LOC_Os10g20420	Chr10	10270200	10271999
Chr3	12249400	12250199	173	149	260	243	235	1.15675	0.00206528	up		LOC_Os01g72570	Chr1	42094800	42095599
Chr3	12255800	12256799	296	320	376	330	375	0.714442	0.0463562	up		LOC_Os05g11900	Chr5	6773200	6774399
Chr3	12551400	12552199	202	220	300	198	250	0.729688	0.0310058	up		LOC_Os06g51410	Chr6	31145400	31146599
Chr3	12567800	12568399	132	119	215	164	213	1.09057	0.00225138	up		LOC_Os04g53990	Chr4	32166400	32169399
Chr3	12617400	12617799	163	172	74	64	76	-0.769246	0.0457906	down		LOC_Os11g29230	Chr11	16944000	16944999
Chr3	12624600	12625999	318	342	435	325	435	0.704924	0.0463617	up		LOC_Os10g08011	Chr10	4323200	4324199
Chr3	12666000	12666399	119	125	182	143	148	0.918873	0.0224706	up		LOC_Os05g25400	Chr5	14768400	14770999
Chr3	12718000	12718399	120	119	161	124	168	0.755079	0.0385424	up		LOC_Os01g16400	Chr1	9316000	9318599
Chr3	1282600	1283799	295	329	400	304	353	0.678913	0.0309114	up		LOC_Os11g04295	Chr11	1780400	1781799
Chr3	12873000	12873599	129	146	215	182	173	1.04575	0.00979917	up		LOC_Os01g01640	Chr1	319600	320599
Chr3	12883400	12884199	171	114	250	169	196	1.02469	0.0296054	up		LOC_Os04g02550	Chr4	946200	948799
Chr3	12961600	12961999	130	149	165	174	153	0.817737	0.0493004	up		LOC_Os12g19260	Chr12	11168200	11169399
Chr3	132000	132599	142	173	233	169	190	0.8564	0.0125687	up		LOC_Os06g05650	Chr6	2557400	2558599
Chr3	13275200	13275799	265	251	126	69	146	-0.93479	0.0281841	down		LOC_Os06g05660	Chr6	2557400	2558599
Chr3	135200	135599	100	92	141	128	145	0.999179	0.0139149	up		LOC_Os04g40790	Chr4	24204400	24205599
Chr3	13658600	13659599	349	379	192	133	177	-0.668158	0.0451268	down		LOC_Os01g06570	Chr1	3094000	3095999
Chr3	13890400	13891199	215	177	288	234	268	0.910115	0.0182391	up		LOC_Os11g04160	Chr11	1688600	1690399
Chr3	14043200	14043799	98	122	199	169	210	1.26164	6.59195e-05	up		LOC_Os08g33290	Chr8	20744800	20745999
Chr3	14070800	14071799	205	172	311	232	321	1.01563	0.0122437	up		LOC_Os03g15470	Chr3	8496800	8498199
Chr3	14120800	14121199	112	164	33	24	27	-1.7619	3.40694e-05	down		LOC_Os05g28390	Chr5	16632400	16633399
Chr3	14244000	14244799	238	225	302	250	318	0.758881	0.0450605	up		LOC_Os06g13440	Chr6	7396800	7397799
Chr3	14299600	14300999	555	605	279	215	271	-0.726942	0.0143333	down		LOC_Os02g03330	Chr2	1343200	1345599
Chr3	14474800	14475599	212	242	326	253	295	0.858877	0.00797898	up		LOC_Os12g15370	Chr12	8771600	8775399
Chr3	14480400	14480799	77	58	134	109	118	1.34392	0.00072197	up		LOC_Os09g14420	Chr9	8518800	8520599
Chr3	14550600	14551599	358	379	178	135	207	-0.733874	0.0239788	down		LOC_Os06g37840	Chr6	22397800	22398999
Chr3	14891000	14891799	238	230	345	264	324	0.878558	0.0162354	up		LOC_Os07g03890	Chr7	1627600	1628799
Chr3	14907200	14907799	113	136	159	146	165	0.817261	0.0288635	up		LOC_Os02g51540	Chr2	31569800	31570799
Chr3	15008400	15008999	44	37	186	120	42	2.39842	9.91136e-11	up		LOC_Os05g17604	Chr5	10118600	10119599
Chr3	15029400	15030799	205	224	407	308	262	1.24063	8.52098e-06	up		LOC_Os04g55410	Chr4	32959200	32960399
Chr3	15039200	15039999	129	123	267	200	267	1.38636	0.000338887	up		LOC_Os04g28830	Chr4	17077200	17078799
Chr3	15075800	15076599	143	188	273	228	278	1.12017	0.00431594	up		LOC_Os07g47970	Chr7	28655000	28655999
Chr3	15079800	15080799	164	169	324	254	255	1.30004	8.86827e-06	up		LOC_Os03g09880	Chr3	4912400	4915799
Chr3	15587000	15587999	505	563	234	205	234	-0.765074	0.0194832	down		LOC_Os06g43700	Chr6	26312800	26315399
Chr3	15745200	15745999	149	165	246	202	262	1.02494	0.011405	up		LOC_Os12g20360	Chr12	11889000	11890599
Chr3	15766000	15767399	408	415	569	474	512	0.851483	0.019393	up
Chr3	15774000	15774399	120	122	163	140	143	0.835847	0.0213539	up
Chr3	15827800	15829199	329	334	488	377	478	0.885496	0.0243351	up
Chr3	15854600	15855399	360	328	177	104	147	-0.819907	0.0330919	down
Chr3	16049000	16049599	138	154	242	177	229	1.02255	0.000706286	up
Chr3	16085000	16085599	241	243	108	92	122	-0.76657	0.0457668	down
Chr3	16087800	16088599	228	215	285	254	294	0.795348	0.0355012	up
Chr3	16143000	16143599	290	269	110	95	81	-0.941221	0.0257357	down
Chr3	16178400	16179399	246	287	333	258	271	0.657772	0.0354989	up
Chr3	1619600	1620199	108	151	177	157	220	0.895174	0.0140104	up
Chr3	16446000	16446399	84	69	140	110	92	1.20444	0.00165161	up
Chr3	16457600	16459199	125	85	449	370	287	2.45353	8.42826e-09	up
Chr3	16480200	16481199	91	40	332	247	46	2.60539	2.01759e-07	up
Chr3	16503400	16504999	167	102	513	424	89	2.28546	7.47689e-09	up
Chr3	16511000	16511799	86	47	262	216	35	2.32857	4.26406e-08	up
Chr3	16512400	16513599	107	50	436	267	75	2.60518	8.7905e-08	up
Chr3	16516400	16518199	140	90	526	401	85	2.49095	4.81578e-12	up
Chr3	16518600	16520199	175	114	561	448	86	2.28827	6.03546e-10	up
Chr3	16523600	16524399	87	32	220	202	72	2.2989	0.0136537	up
Chr3	16599200	16599799	157	167	228	191	215	0.882683	0.0100548	up
Chr3	16603600	16604199	130	157	189	163	227	0.814062	0.0229003	up
Chr3	16859200	16860599	590	614	178	139	153	-1.42231	5.99991e-08	down
Chr3	16866600	16866999	96	85	133	106	175	0.900728	0.0221007	up
Chr3	16901600	16902199	163	170	256	203	171	0.96885	0.00202676	up
Chr3	16955800	16956199	82	74	141	124	103	1.27402	0.000423794	up
Chr3	16977400	16978599	429	421	209	162	234	-0.696313	0.0418052	down
Chr3	17549400	17550799	667	603	267	184	253	-1.00957	0.00495907	down
[truncated: 2,123 more rows]
