# Supplementary material for: The Global Changes of N6-methyldeoxyadenosine in Response to Low Temperature in Arabidopsis thaliana and Rice
Source: Plants (Basel). 2023 Jun 19;12(12):2373. doi: 10.3390/plants12122373 (PMC10305114; doi:10.3390/plants12122373)
Supplement: Supplementary file 1 [file plants-12-02373-s001.zip › Table S7.xlsx]

## Sheet: Sheet1
		Table S7. Go analysis of up-DMGs in rice after cold treatment.
GO_acc	term_type	Term	queryitem	querytotal	bgitem	bgtotal	pvalue	FDR
GO:0017076	F	purine nucleotide binding	211	747	3456	24075	4.9e-22	1.5e-19
GO:0032555	F	purine ribonucleotide binding	204	747	3292	24075	6e-22	1.5e-19
GO:0032553	F	ribonucleotide binding	204	747	3292	24075	6e-22	1.5e-19
GO:0001882	F	nucleoside binding	202	747	3257	24075	9.6e-22	1.8e-19
GO:0030554	F	adenyl nucleotide binding	201	747	3247	24075	1.6e-21	1.9e-19
GO:0005524	F	ATP binding	194	747	3085	24075	1.9e-21	1.9e-19
GO:0001883	F	purine nucleoside binding	201	747	3247	24075	1.6e-21	1.9e-19
GO:0032559	F	adenyl ribonucleotide binding	194	747	3087	24075	2.1e-21	1.9e-19
GO:0000166	F	nucleotide binding	225	747	3874	24075	4.9e-21	4e-19
GO:0012501	P	programmed cell death	56	747	532	24075	3.1e-14	1.4e-11
GO:0006915	P	apoptosis	56	747	532	24075	3.1e-14	1.4e-11
GO:0016265	P	death	56	747	544	24075	7.2e-14	1.7e-11
GO:0008219	P	cell death	56	747	544	24075	7.2e-14	1.7e-11
GO:0050896	P	response to stimulus	71	747	1026	24075	1.2e-09	1.8e-07
GO:0006950	P	response to stress	64	747	873	24075	1e-09	1.8e-07
GO:0006952	P	defense response	41	747	452	24075	5.3e-09	6.9e-07
GO:0043687	P	post-translational protein modification	103	747	1815	24075	6e-09	6.9e-07
GO:0004674	F	protein serine/threonine kinase activity	88	747	1478	24075	1.1e-08	8.2e-07
GO:0006464	P	protein modification process	106	747	1929	24075	1.7e-08	1.8e-06
GO:0004672	F	protein kinase activity	90	747	1575	24075	4.6e-08	3.1e-06
GO:0016301	F	kinase activity	97	747	1750	24075	5.2e-08	3.2e-06
GO:0043412	P	macromolecule modification	106	747	1979	24075	6e-08	5.6e-06
GO:0016773	F	phosphotransferase activity, alcohol group as acceptor	95	747	1726	24075	9.9e-08	5.6e-06
GO:0006468	P	protein amino acid phosphorylation	89	747	1570	24075	7.7e-08	6.5e-06
GO:0044267	P	cellular protein metabolic process	139	747	2877	24075	1.6e-07	1.1e-05
GO:0016310	P	phosphorylation	93	747	1695	24075	1.6e-07	1.1e-05
GO:0006796	P	phosphate metabolic process	95	747	1795	24075	5.3e-07	3.3e-05
GO:0006793	P	phosphorus metabolic process	95	747	1795	24075	5.3e-07	3.3e-05
GO:0003824	F	catalytic activity	450	747	12724	24075	3.7e-05	0.0019
GO:0016462	F	pyrophosphatase activity	44	747	743	24075	6.8e-05	0.0033
GO:0016747	F	transferase activity, transferring acyl groups other than amino-acyl groups	26	747	348	24075	7.5e-05	0.0034
GO:0017111	F	nucleoside-triphosphatase activity	43	747	726	24075	8.2e-05	0.0035
GO:0016818	F	hydrolase activity, acting on acid anhydrides, in phosphorus-containing anhydrides	44	747	759	24075	0.00011	0.0043
GO:0008238	F	exopeptidase activity	11	747	82	24075	0.00011	0.0043
GO:0016817	F	hydrolase activity, acting on acid anhydrides	44	747	764	24075	0.00012	0.0045
GO:0008415	F	acyltransferase activity	16	747	166	24075	0.00013	0.0046
GO:0016746	F	transferase activity, transferring acyl groups	26	747	367	24075	0.00017	0.0056
GO:0070008	F	serine-type exopeptidase activity	9	747	61	24075	0.00024	0.0074
GO:0004185	F	serine-type carboxypeptidase activity	9	747	61	24075	0.00024	0.0074
GO:0004180	F	carboxypeptidase activity	9	747	63	24075	0.0003	0.0089
GO:0016491	F	oxidoreductase activity	78	747	1672	24075	0.00033	0.0092
GO:0009056	P	catabolic process	29	747	433	24075	0.00018	0.01
GO:0019538	P	protein metabolic process	173	747	4333	24075	0.00027	0.015
GO:0005509	F	calcium ion binding	22	747	316	24075	0.00064	0.017
GO:0005515	F	protein binding	104	747	2460	24075	0.00099	0.026
GO:0016679	F	oxidoreductase activity, acting on diphenols and related substances as donors	6	747	36	24075	0.0015	0.038
GO:0055114	P	oxidation reduction	64	747	1351	24075	0.00078	0.04
