# Supplementary material for: The Global Changes of N6-methyldeoxyadenosine in Response to Low Temperature in Arabidopsis thaliana and Rice
Source: Plants (Basel). 2023 Jun 19;12(12):2373. doi: 10.3390/plants12122373 (PMC10305114; doi:10.3390/plants12122373)
Supplement: Supplementary file 1 [file plants-12-02373-s001.zip › Table S8.xlsx]

## Sheet: Sheet1
		Table S8. The DEGs in Arabidopsis and rice after cold treatment.
Arabidopsis				Rice
gene	cold_f	cold_fdr		gene	cold_f	cold_fdr
AT1G01020	1.45546	0.000107399		LOC_Os01g01010	-1.25431	7.99e-05
AT1G01030	-1.95654	0.000107399		LOC_Os01g01019	2.09576	7.99e-05
AT1G01060	-5.32913	0.000107399		LOC_Os01g01070	0.505745	7.99e-05
AT1G01080	-2.07476	0.000107399		LOC_Os01g01080	-0.831942	7.99e-05
AT1G01120	-4.10588	0.000107399		LOC_Os01g01115	-1.62304	7.99e-05
AT1G01140	1.16449	0.000107399		LOC_Os01g01120	-0.41151	7.99e-05
AT1G01160	2.43296	0.000107399		LOC_Os01g01150	-0.880919	7.99e-05
AT1G01170	1.9135	0.000107399		LOC_Os01g01160	-0.991412	7.99e-05
AT1G01180	1.68691	0.000107399		LOC_Os01g01290	1.81271	7.99e-05
AT1G01190	-3.99302	0.000107399		LOC_Os01g01295	1.15012	7.99e-05
AT1G01220	-1.61288	0.000107399		LOC_Os01g01302	1.23808	7.99e-05
AT1G01240	3.76807	0.000107399		LOC_Os01g01307	-1.18855	7.99e-05
AT1G01260	1.6599	0.000107399		LOC_Os01g01312	0.819763	7.99e-05
AT1G01300	-1.96087	0.000107399		LOC_Os01g01330	5.48921	7.99e-05
AT1G01340	1.77955	0.000107399		LOC_Os01g01340	0.811834	7.99e-05
AT1G01350	1.70587	0.000107399		LOC_Os01g01350	-0.65368	7.99e-05
AT1G01360	1.52148	0.000107399		LOC_Os01g01360	-3.7805	7.99e-05
AT1G01370	-2.43413	0.000107399		LOC_Os01g01369	-0.621284	7.99e-05
AT1G01390	-3.65192	0.000107399		LOC_Os01g01380	0.416958	7.99e-05
AT1G01448	2.0862	0.000107399		LOC_Os01g01390	-0.735868	7.99e-05
AT1G01450	2.66065	0.000107399		LOC_Os01g01410	-1.62428	7.99e-05
AT1G01470	2.01191	0.000107399		LOC_Os01g01450	-1.26078	7.99e-05
AT1G01480	2.78924	0.000107399		LOC_Os01g01484	0.411162	7.99e-05
AT1G01490	1.57007	0.000107399		LOC_Os01g01510	-0.785695	7.99e-05
AT1G01500	1.36651	0.000107399		LOC_Os01g01520	-2.94497	7.99e-05
AT1G01540	-1.03869	0.000107399		LOC_Os01g01570	-0.79736	7.99e-05
AT1G01580	-2.33725	0.000107399		LOC_Os01g01640	-0.456523	7.99e-05
AT1G01600	-1.93284	0.000107399		LOC_Os01g01650	-3.68651	7.99e-05
AT1G01620	1.33813	0.000107399		LOC_Os01g01660	-3.93187	7.99e-05
AT1G01630	-1.31471	0.000107399		LOC_Os01g01670	-1.59403	7.99e-05
AT1G01650	1.54787	0.000107399		LOC_Os01g01689	-1.223	7.99e-05
AT1G01680	-2.90752	0.000107399		LOC_Os01g01700	-0.334097	7.99e-05
AT1G01690	-2.64461	0.000107399		LOC_Os01g01710	0.672596	7.99e-05
AT1G01710	1.11438	0.000107399		LOC_Os01g01720	0.370362	7.99e-05
AT1G01720	3.80823	0.000107399		LOC_Os01g01740	-1.25074	7.99e-05
AT1G01740	-2.65008	0.000107399		LOC_Os01g01760	-1.60498	7.99e-05
AT1G01770	1.47159	0.000107399		LOC_Os01g01800	-0.447343	7.99e-05
AT1G01790	-3.33374	0.000107399		LOC_Os01g01810	inf	7.99e-05
AT1G01810	2.31023	0.000107399		LOC_Os01g01830	-0.301031	7.99e-05
AT1G01820	2.60272	0.000107399		LOC_Os01g01840	0.439729	7.99e-05
AT1G01930	2.25254	0.000107399		LOC_Os01g01870	0.383482	7.99e-05
AT1G01940	5.50054	0.000107399		LOC_Os01g01890	2.11923	7.99e-05
AT1G01990	2.3881	0.000107399		LOC_Os01g01960	0.388329	7.99e-05
AT1G02000	1.16873	0.000107399		LOC_Os01g02010	-1.77832	7.99e-05
AT1G02065	2.68697	0.000107399		LOC_Os01g02020	0.752398	7.99e-05
AT1G02090	2.00594	0.000107399		LOC_Os01g02040	-1.72162	7.99e-05
AT1G02100	2.18373	0.000107399		LOC_Os01g02060	-1.94411	7.99e-05
AT1G02140	3.02478	0.000107399		LOC_Os01g02080	-1.62624	7.99e-05
AT1G02145	-1.32639	0.000107399		LOC_Os01g02139	-1.91678	7.99e-05
AT1G02170	1.06389	0.000107399		LOC_Os01g02150	-3.62104	7.99e-05
AT1G02205	-1.20729	0.000107399		LOC_Os01g02170	-1.68674	7.99e-05
AT1G02220	1.59729	0.000107399		LOC_Os01g02200	-1.39587	7.99e-05
AT1G02230	5.48326	0.000107399		LOC_Os01g02290	1.55338	7.99e-05
AT1G02260	-2.44843	0.000107399		LOC_Os01g02300	2.41734	7.99e-05
AT1G02270	1.26509	0.000107399		LOC_Os01g02310	-0.739683	7.99e-05
AT1G02280	1.37833	0.000107399		LOC_Os01g02370	-2.90574	7.99e-05
AT1G02290	1.63889	0.000107399		LOC_Os01g02400	-2.68071	7.99e-05
AT1G02300	2.60402	0.000107399		LOC_Os01g02490	-1.14026	7.99e-05
AT1G02305	2.05837	0.000107399		LOC_Os01g02540	inf	7.99e-05
AT1G02335	-1.64178	0.000107399		LOC_Os01g02550	-3.2702	7.99e-05
AT1G02340	6.79767	0.000107399		LOC_Os01g02560	-0.60493	7.99e-05
AT1G02350	4.31873	0.000107399		LOC_Os01g02570	-3.77112	7.99e-05
AT1G02360	-2.51611	0.000107399		LOC_Os01g02580	-1.90841	7.99e-05
AT1G02380	2.2726	0.000107399		LOC_Os01g02590	-2.19378	7.99e-05
AT1G02470	1.45076	0.000107399		LOC_Os01g02600	-4.43118	7.99e-05
AT1G02610	4.60713	0.000107399		LOC_Os01g02700	-2.27447	7.99e-05
AT1G02640	4.06915	0.000107399		LOC_Os01g02710	-1.61075	7.99e-05
AT1G02650	2.20107	0.000107399		LOC_Os01g02720	-0.62346	7.99e-05
AT1G02660	4.28863	0.000107399		LOC_Os01g02750	0.491206	7.99e-05
AT1G02670	3.42659	0.000107399		LOC_Os01g02760	-1.18163	7.99e-05
AT1G02680	2.38279	0.000107399		LOC_Os01g02770	-0.636282	7.99e-05
AT1G02681	inf	0.000107399		LOC_Os01g02830	-1.26896	7.99e-05
AT1G02690	-1.85837	0.000107399		LOC_Os01g02840	-1.36192	7.99e-05
AT1G02700	1.80396	0.000107399		LOC_Os01g02860	-1.13881	7.99e-05
AT1G02720	-3.34322	0.000107399		LOC_Os01g02870	-3.26803	7.99e-05
AT1G02730	-4.84652	0.000107399		LOC_Os01g02880	-1.01232	7.99e-05
AT1G02750	2.26274	0.000107399		LOC_Os01g02900	2.9006	7.99e-05
AT1G02800	-5.067	0.000107399		LOC_Os01g02920	-0.499549	7.99e-05
AT1G02840	2.14869	0.000107399		LOC_Os01g02940	-1.66778	7.99e-05
AT1G02860	2.99102	0.000107399		LOC_Os01g02960	-0.458143	7.99e-05
AT1G02870	2.15199	0.000107399		LOC_Os01g03020	-0.583891	7.99e-05
AT1G02890	2.13577	0.000107399		LOC_Os01g03040	1.64371	7.99e-05
AT1G02930	-1.02266	0.000107399		LOC_Os01g03050	0.963556	7.99e-05
AT1G02950	-1.87861	0.000107399		LOC_Os01g03060	2.53177	7.99e-05
AT1G03020	#NAME?	0.000107399		LOC_Os01g03070	-0.608348	7.99e-05
AT1G03040	1.91824	0.000107399		LOC_Os01g03090	0.732903	7.99e-05
AT1G03055	-2.45545	0.000107399		LOC_Os01g03100	1.07653	7.99e-05
AT1G03060	-2.51577	0.000107399		LOC_Os01g03110	-0.962756	7.99e-05
AT1G03070	7.54202	0.000107399		LOC_Os01g03130	2.49363	7.99e-05
AT1G03090	3.18789	0.000107399		LOC_Os01g03144	0.523948	7.99e-05
AT1G03110	-2.62924	0.000107399		LOC_Os01g03160	-0.699799	7.99e-05
AT1G03130	1.48844	0.000107399		LOC_Os01g03180	-2.12331	7.99e-05
AT1G03140	3.80099	0.000107399		LOC_Os01g03310	-1.33076	7.99e-05
AT1G03150	1.75262	0.000107399		LOC_Os01g03320	-5.60772	7.99e-05
AT1G03160	-0.946873	0.000107399		LOC_Os01g03330	-0.515355	7.99e-05
AT1G03180	2.86638	0.000107399		LOC_Os01g03340	-1.59128	7.99e-05
AT1G03200	2.2641	0.000107399		LOC_Os01g03360	-0.714114	7.99e-05
AT1G03220	4.64515	0.000107399		LOC_Os01g03390	-0.750322	7.99e-05
AT1G03230	1.16966	0.000107399		LOC_Os01g03500	-1.28202	7.99e-05
AT1G03270	-1.93701	0.000107399		LOC_Os01g03510	-1.98099	7.99e-05
AT1G03300	-3.85553	0.000107399		LOC_Os01g03549	-0.768963	7.99e-05
AT1G03310	-3.06738	0.000107399		LOC_Os01g03650	-0.27262	7.99e-05
AT1G03330	2.16166	0.000107399		LOC_Os01g03660	-1.42749	7.99e-05
AT1G03360	2.69213	0.000107399		LOC_Os01g03680	-0.7376	7.99e-05
AT1G03420	-2.78831	0.000107399		LOC_Os01g03690	2.17123	7.99e-05
AT1G03470	2.60067	0.000107399		LOC_Os01g03710	1.29011	7.99e-05
AT1G03495	-1.63442	0.000107399		LOC_Os01g03730	0.698394	7.99e-05
AT1G03510	-2.58142	0.000107399		LOC_Os01g03750	1.68828	7.99e-05
AT1G03580	3.28959	0.000107399		LOC_Os01g03820	-1.28117	7.99e-05
AT1G03590	1.68457	0.000107399		LOC_Os01g03870	-3.77979	7.99e-05
AT1G03610	3.72549	0.000107399		LOC_Os01g03914	-0.451233	7.99e-05
AT1G03620	3.66242	0.000107399		LOC_Os01g03940	2.12943	7.99e-05
AT1G03687	-1.44429	0.000107399		LOC_Os01g03950	1.99289	7.99e-05
AT1G03760	2.72611	0.000107399		LOC_Os01g03980	1.40053	7.99e-05
AT1G03780	-4.33212	0.000107399		LOC_Os01g04010	-1.45516	7.99e-05
AT1G03820	-4.00673	0.000107399		LOC_Os01g04020	2.01921	7.99e-05
AT1G03830	-1.74669	0.000107399		LOC_Os01g04030	-0.512107	7.99e-05
AT1G03850	2.04242	0.000107399		LOC_Os01g04050	0.535051	7.99e-05
AT1G03860	3.22413	0.000107399		LOC_Os01g04090	inf	7.99e-05
AT1G03870	-1.34852	0.000107399		LOC_Os01g04100	2.38675	7.99e-05
AT1G03900	1.36014	0.000107399		LOC_Os01g04110	1.30503	7.99e-05
AT1G03905	1.87861	0.000107399		LOC_Os01g04120	1.66229	7.99e-05
AT1G03910	1.57974	0.000107399		LOC_Os01g04130	-0.964446	7.99e-05
AT1G03960	1.77617	0.000107399		LOC_Os01g04190	-1.00089	7.99e-05
AT1G03970	3.53982	0.000107399		LOC_Os01g04200	-0.555677	7.99e-05
AT1G03980	3.02188	0.000107399		LOC_Os01g04250	-2.79842	7.99e-05
AT1G04000	-1.86238	0.000107399		LOC_Os01g04260	0.394732	7.99e-05
AT1G04020	-5.20316	0.000107399		LOC_Os01g04280	4.38351	7.99e-05
AT1G04040	-1.26104	0.000107399		LOC_Os01g04324	1.10978	7.99e-05
AT1G04050	-3.21177	0.000107399		LOC_Os01g04330	5.91895	7.99e-05
AT1G04100	1.27408	0.000107399		LOC_Os01g04350	-1.69379	7.99e-05
AT1G04110	-4.26523	0.000107399		LOC_Os01g04409	0.926791	7.99e-05
AT1G04120	-1.15999	0.000107399		LOC_Os01g04460	-2.07746	7.99e-05
AT1G04200	-1.75444	0.000107399		LOC_Os01g04490	-1.55681	7.99e-05
AT1G04240	-1.43795	0.000107399		LOC_Os01g04510	0.946357	7.99e-05
AT1G04290	-2.28098	0.000107399		LOC_Os01g04550	0.951932	7.99e-05
AT1G04300	1.91621	0.000107399		LOC_Os01g04570	-1.72365	7.99e-05
AT1G04310	1.07164	0.000107399		LOC_Os01g04590	-0.528833	7.99e-05
AT1G04340	-1.22056	0.000107399		LOC_Os01g04640	0.872138	7.99e-05
AT1G04350	-1.2425	0.000107399		LOC_Os01g04650	-0.872875	7.99e-05
AT1G04390	1.42804	0.000107399		LOC_Os01g04670	1.08534	7.99e-05
AT1G04400	2.19741	0.000107399		LOC_Os01g04710	-6.302	7.99e-05
AT1G04430	-1.3708	0.000107399		LOC_Os01g04720	-2.42481	7.99e-05
AT1G04440	2.99878	0.000107399		LOC_Os01g04750	1.19182	7.99e-05
AT1G04520	-4.5656	0.000107399		LOC_Os01g04800	1.87923	7.99e-05
AT1G04530	-1.15503	0.000107399		LOC_Os01g04814	1.42453	7.99e-05
AT1G04540	-2.76263	0.000107399		LOC_Os01g04860	0.867002	7.99e-05
AT1G04550	-1.19107	0.000107399		LOC_Os01g04870	0.409749	7.99e-05
AT1G04555	1.48439	0.000107399		LOC_Os01g04920	1.00841	7.99e-05
AT1G04570	2.59913	0.000107399		LOC_Os01g04930	1.07437	7.99e-05
AT1G04635	1.77202	0.000107399		LOC_Os01g04950	-0.83357	7.99e-05
AT1G04640	-1.13977	0.000107399		LOC_Os01g05010	-1.6345	7.99e-05
AT1G04645	#NAME?	0.000107399		LOC_Os01g05060	-0.255418	7.99e-05
AT1G04650	-2.21519	0.000107399		LOC_Os01g05080	-1.44871	7.99e-05
AT1G04680	-3.1922	0.000107399		LOC_Os01g05090	0.830331	7.99e-05
AT1G04710	-1.26431	0.000107399		LOC_Os01g05100	1.56246	7.99e-05
AT1G04750	1.44997	0.000107399		LOC_Os01g05130	1.047	7.99e-05
AT1G04770	-1.41569	0.000107399		LOC_Os01g05180	-1.13849	7.99e-05
AT1G04780	1.37785	0.000107399		LOC_Os01g05260	inf	7.99e-05
AT1G04800	-1.95843	0.000107399		LOC_Os01g05289	-1.40054	7.99e-05
AT1G04810	2.47375	0.000107399		LOC_Os01g05420	0.629321	7.99e-05
AT1G04830	2.46815	0.000107399		LOC_Os01g05470	-1.40998	7.99e-05
AT1G04930	1.52096	0.000107399		LOC_Os01g05480	1.31823	7.99e-05
AT1G04960	2.48108	0.000107399		LOC_Os01g05490	0.549214	7.99e-05
AT1G04970	2.66627	0.000107399		LOC_Os01g05530	0.460518	7.99e-05
AT1G04985	3.0952	0.000107399		LOC_Os01g05560	-1.52688	7.99e-05
AT1G04990	-1.23563	0.000107399		LOC_Os01g05620	-2.11788	7.99e-05
AT1G05000	4.73976	0.000107399		LOC_Os01g05630	1.25306	7.99e-05
AT1G05100	1.63533	0.000107399		LOC_Os01g05640	3.1585	7.99e-05
AT1G05150	-1.66257	0.000107399		LOC_Os01g05650	0.389901	7.99e-05
AT1G05170	1.69484	0.000107399		LOC_Os01g05660	0.705973	7.99e-05
AT1G05180	1.14975	0.000107399		LOC_Os01g05680	0.9886	7.99e-05
AT1G05230	-1.16827	0.000107399		LOC_Os01g05694	0.587515	7.99e-05
AT1G05270	2.96734	0.000107399		LOC_Os01g05790	1.05345	7.99e-05
AT1G05310	-1.68583	0.000107399		LOC_Os01g05800	0.794696	7.99e-05
AT1G05320	-2.13625	0.000107399		LOC_Os01g05810	0.750368	7.99e-05
AT1G05340	4.62201	0.000107399		LOC_Os01g05820	-2.88173	7.99e-05
AT1G05350	-1.90103	0.000107399		LOC_Os01g05830	-0.391366	7.99e-05
AT1G05360	-1.8189	0.000107399		LOC_Os01g05840	1.18436	7.99e-05
AT1G05370	-3.28577	0.000107399		LOC_Os01g05860	-1.08816	7.99e-05
AT1G05385	1.64871	0.000107399		LOC_Os01g05940	1.79191	7.99e-05
AT1G05460	-1.94405	0.000107399		LOC_Os01g05970	-0.758493	7.99e-05
AT1G05470	-1.7216	0.000107399		LOC_Os01g06000	-1.02923	7.99e-05
AT1G05520	-0.972231	0.000107399		LOC_Os01g06010	-0.562382	7.99e-05
AT1G05540	-3.34945	0.000107399		LOC_Os01g06050	-2.38691	7.99e-05
AT1G05570	-1.4147	0.000107399		LOC_Os01g06220	3.63447	7.99e-05
AT1G05590	-2.81923	0.000107399		LOC_Os01g06270	0.69096	7.99e-05
AT1G05620	-1.01488	0.000107399		LOC_Os01g06280	-0.65557	7.99e-05
AT1G05630	-3.05366	0.000107399		LOC_Os01g06310	-3.16585	7.99e-05
AT1G05640	-3.11839	0.000107399		LOC_Os01g06454	-1.31451	7.99e-05
AT1G05675	-1.43928	0.000107399		LOC_Os01g06460	0.975677	7.99e-05
AT1G05710	-1.60231	0.000107399		LOC_Os01g06470	1.65009	7.99e-05
AT1G05770	2.74248	0.000107399		LOC_Os01g06500	-2.54829	7.99e-05
AT1G05780	1.46102	0.000107399		LOC_Os01g06510	1.09033	7.99e-05
AT1G05790	1.44004	0.000107399		LOC_Os01g06520	-2.41116	7.99e-05
AT1G05810	1.43383	0.000107399		LOC_Os01g06550	0.318074	7.99e-05
AT1G05820	4.50102	0.000107399		LOC_Os01g06560	inf	7.99e-05
AT1G05830	-1.40032	0.000107399		LOC_Os01g06580	1.80517	7.99e-05
AT1G05860	1.68643	0.000107399		LOC_Os01g06590	1.97058	7.99e-05
AT1G05870	-1.98427	0.000107399		LOC_Os01g06600	0.7978	7.99e-05
AT1G05890	2.38954	0.000107399		LOC_Os01g06640	-2.14557	7.99e-05
AT1G05910	-1.49061	0.000107399		LOC_Os01g06660	-1.42355	7.99e-05
AT1G05950	-2.98317	0.000107399		LOC_Os01g06680	0.448117	7.99e-05
AT1G05970	2.62488	0.000107399		LOC_Os01g06740	5.7854	7.99e-05
AT1G05990	inf	0.000107399		LOC_Os01g06836	3.9512	7.99e-05
AT1G06040	2.69454	0.000107399		LOC_Os01g06876	5.11374	7.99e-05
AT1G06050	1.10785	0.000107399		LOC_Os01g06890	4.32554	7.99e-05
AT1G06070	1.63088	0.000107399		LOC_Os01g06900	-0.558237	7.99e-05
AT1G06110	1.18609	0.000107399		LOC_Os01g06920	-1.18641	7.99e-05
AT1G06149	-2.59139	0.000107399		LOC_Os01g07080	0.387364	7.99e-05
AT1G06160	-1.43158	0.000107399		LOC_Os01g07090	1.80143	7.99e-05
AT1G06180	-1.35067	0.000107399		LOC_Os01g07100	0.53575	7.99e-05
AT1G06190	1.4188	0.000107399		LOC_Os01g07120	0.643382	7.99e-05
AT1G06200	1.93647	0.000107399		LOC_Os01g07200	-0.393495	7.99e-05
AT1G06230	1.29165	0.000107399		LOC_Os01g07260	0.772563	7.99e-05
AT1G06270	-2.0789	0.000107399		LOC_Os01g07280	-0.819596	7.99e-05
AT1G06320	inf	0.000107399		LOC_Os01g07310	1.10451	7.99e-05
AT1G06350	-1.33899	0.000107399		LOC_Os01g07360	3.09276	7.99e-05
AT1G06360	-4.09661	0.000107399		LOC_Os01g07364	inf	7.99e-05
AT1G06400	2.78401	0.000107399		LOC_Os01g07370	2.30948	7.99e-05
AT1G06420	-2.63304	0.000107399		LOC_Os01g07376	-1.34243	7.99e-05
AT1G06430	1.79291	0.000107399		LOC_Os01g07382	-0.584855	7.99e-05
AT1G06440	-1.7805	0.000107399		LOC_Os01g07390	1.14918	7.99e-05
AT1G06460	1.56239	0.000107399		LOC_Os01g07410	0.414768	7.99e-05
AT1G06475	-3.37916	0.000107399		LOC_Os01g07420	-2.43337	7.99e-05
AT1G06490	-1.98427	0.000107399		LOC_Os01g07490	-0.572378	7.99e-05
AT1G06520	2.00547	0.000107399		LOC_Os01g07520	0.597872	7.99e-05
AT1G06550	-2.91934	0.000107399		LOC_Os01g07530	2.21928	7.99e-05
AT1G06570	5.57842	0.000107399		LOC_Os01g07610	-1.12337	7.99e-05
AT1G06590	-2.58913	0.000107399		LOC_Os01g07630	-1.71908	7.99e-05
AT1G06620	1.05649	0.000107399		LOC_Os01g07700	1.2492	7.99e-05
AT1G06630	2.70637	0.000107399		LOC_Os01g07730	-0.799636	7.99e-05
AT1G06645	2.48842	0.000107399		LOC_Os01g07740	0.348828	7.99e-05
AT1G06650	1.03506	0.000107399		LOC_Os01g07750	1.18773	7.99e-05
AT1G06690	-1.73372	0.000107399		LOC_Os01g07760	0.531725	7.99e-05
AT1G06700	1.39673	0.000107399		LOC_Os01g07770	1.21974	7.99e-05
AT1G06760	-3.29793	0.000107399		LOC_Os01g07780	-3.19067	7.99e-05
AT1G06820	-1.8487	0.000107399		LOC_Os01g07810	0.355452	7.99e-05
AT1G06830	-5.82747	0.000107399		LOC_Os01g07870	0.703841	7.99e-05
AT1G06840	1.60047	0.000107399		LOC_Os01g07890	-3.68281	7.99e-05
AT1G06910	-1.83501	0.000107399		LOC_Os01g07910	-1.40534	7.99e-05
AT1G06925	inf	0.000107399		LOC_Os01g07940	-1.21438	7.99e-05
AT1G06960	-1.32547	0.000107399		LOC_Os01g07950	0.512437	7.99e-05
AT1G07030	2.29358	0.000107399		LOC_Os01g07970	2.21143	7.99e-05
AT1G07040	2.4008	0.000107399		LOC_Os01g08000	-1.83588	7.99e-05
AT1G07070	-1.72299	0.000107399		LOC_Os01g08010	-1.90297	7.99e-05
AT1G07080	1.39206	0.000107399		LOC_Os01g08120	-1.15051	7.99e-05
AT1G07140	1.46601	0.000107399		LOC_Os01g08260	-1.34485	7.99e-05
AT1G07150	3.53496	0.000107399		LOC_Os01g08270	0.465035	7.99e-05
AT1G07170	3.5148	0.000107399		LOC_Os01g08290	0.895207	7.99e-05
AT1G07175	#NAME?	0.000107399		LOC_Os01g08310	1.58459	7.99e-05
AT1G07210	1.18072	0.000107399		LOC_Os01g08340	-1.83411	7.99e-05
AT1G07310	2.1061	0.000107399		LOC_Os01g08370	-0.960332	7.99e-05
AT1G07350	5.29018	0.000107399		LOC_Os01g08380	3.37944	7.99e-05
AT1G07370	-1.66859	0.000107399		LOC_Os01g08400	1.11931	7.99e-05
AT1G07390	-2.58844	0.000107399		LOC_Os01g08410	1.37721	7.99e-05
AT1G07400	11.2585	0.000107399		LOC_Os01g08420	0.531135	7.99e-05
AT1G07410	2.18363	0.000107399		LOC_Os01g08430	-0.481687	7.99e-05
AT1G07440	1.20559	0.000107399		LOC_Os01g08440	1.51201	7.99e-05
AT1G07480	1.10882	0.000107399		LOC_Os01g08450	1.5833	7.99e-05
AT1G07500	inf	0.000107399		LOC_Os01g08460	2.29068	7.99e-05
AT1G07530	2.30202	0.000107399		LOC_Os01g08510	-0.889198	7.99e-05
AT1G07610	-2.1725	0.000107399		LOC_Os01g08540	-0.812769	7.99e-05
AT1G07615	1.91096	0.000107399		LOC_Os01g08550	0.580184	7.99e-05
AT1G07620	-1.68859	0.000107399		LOC_Os01g08560	0.288604	7.99e-05
AT1G07630	-1.40256	0.000107399		LOC_Os01g08580	-0.871417	7.99e-05
AT1G07660	-1.43719	0.000107399		LOC_Os01g08600	1.50643	7.99e-05
AT1G07670	1.8089	0.000107399		LOC_Os01g08650	-1.68668	7.99e-05
AT1G07720	-3.3836	0.000107399		LOC_Os01g08660	-1.25407	7.99e-05
AT1G07728	2.33285	0.000107399		LOC_Os01g08670	-3.09154	7.99e-05
AT1G07750	-1.54934	0.000107399		LOC_Os01g08680	2.24822	7.99e-05
AT1G07780	-1.74244	0.000107399		LOC_Os01g08690	2.15874	7.99e-05
AT1G07790	-1.54493	0.000107399		LOC_Os01g08700	-0.339404	7.99e-05
AT1G07820	-1.25527	0.000107399		LOC_Os01g08770	-0.369983	7.99e-05
AT1G07830	2.29627	0.000107399		LOC_Os01g08814	-0.5191	7.99e-05
AT1G07840	1.16663	0.000107399		LOC_Os01g08850	-0.480727	7.99e-05
AT1G07870	2.98823	0.000107399		LOC_Os01g08860	1.551	7.99e-05
AT1G07910	1.12865	0.000107399		LOC_Os01g08880	-1.64207	7.99e-05
AT1G07950	1.40968	0.000107399		LOC_Os01g08890	0.434485	7.99e-05
AT1G07960	1.10157	0.000107399		LOC_Os01g08930	-0.641709	7.99e-05
AT1G07970	-1.64819	0.000107399		LOC_Os01g08960	1.41257	7.99e-05
AT1G08050	-0.954732	0.000107399		LOC_Os01g08970	0.476909	7.99e-05
AT1G08070	1.44098	0.000107399		LOC_Os01g08980	inf	7.99e-05
AT1G08110	1.34692	0.000107399		LOC_Os01g09000	1.20165	7.99e-05
AT1G08125	1.77038	0.000107399		LOC_Os01g09010	3.8874	7.99e-05
AT1G08130	-2.86905	0.000107399		LOC_Os01g09020	2.92897	7.99e-05
AT1G08160	-3.54845	0.000107399		LOC_Os01g09100	3.39571	7.99e-05
AT1G08190	-1.52879	0.000107399		LOC_Os01g09120	2.0018	7.99e-05
AT1G08210	1.64512	0.000107399		LOC_Os01g09220	9.56015	7.99e-05
AT1G08230	1.3183	0.000107399		LOC_Os01g09230	4.73439	7.99e-05
AT1G08250	-1.97617	0.000107399		LOC_Os01g09246	-0.588035	7.99e-05
AT1G08260	-3.38358	0.000107399		LOC_Os01g09252	0.855498	7.99e-05
AT1G08280	-2.85583	0.000107399		LOC_Os01g09280	1.75177	7.99e-05
AT1G08300	2.86578	0.000107399		LOC_Os01g09305	1.87074	7.99e-05
AT1G08315	1.68593	0.000107399		LOC_Os01g09310	0.519709	7.99e-05
AT1G08350	-2.08359	0.000107399		LOC_Os01g09320	1.37767	7.99e-05
AT1G08370	1.1281	0.000107399		LOC_Os01g09370	-1.62454	7.99e-05
AT1G08410	1.61459	0.000107399		LOC_Os01g09384	-1.4501	7.99e-05
AT1G08450	-1.92449	0.000107399		LOC_Os01g09420	0.86295	7.99e-05
AT1G08460	1.88334	0.000107399		LOC_Os01g09430	0.300128	7.99e-05
AT1G08470	-2.22972	0.000107399		LOC_Os01g09450	-2.86338	7.99e-05
AT1G08480	-1.3071	0.000107399		LOC_Os01g09510	-1.27396	7.99e-05
AT1G08530	-2.29357	0.000107399		LOC_Os01g09540	-1.78921	7.99e-05
AT1G08550	1.14034	0.000107399		LOC_Os01g09550	-0.784049	7.99e-05
AT1G08570	2.99147	0.000107399		LOC_Os01g09560	0.301221	7.99e-05
AT1G08620	-1.1656	0.000107399		LOC_Os01g09570	0.962812	7.99e-05
AT1G08630	2.81242	0.000107399		LOC_Os01g09590	-1.69353	7.99e-05
AT1G08640	-1.14129	0.000107399		LOC_Os01g09620	1.04327	7.99e-05
AT1G08650	1.35115	0.000107399		LOC_Os01g09640	-2.96849	7.99e-05
AT1G08710	1.59003	0.000107399		LOC_Os01g09660	-3.46634	7.99e-05
AT1G08720	2.00775	0.000107399		LOC_Os01g09700	2.72391	7.99e-05
AT1G08845	2.51261	0.000107399		LOC_Os01g09770	3.89612	7.99e-05
AT1G08890	2.40884	0.000107399		LOC_Os01g09800	1.81224	7.99e-05
AT1G08900	1.52964	0.000107399		LOC_Os01g09830	-1.53428	7.99e-05
AT1G08910	2.23052	0.000107399		LOC_Os01g09850	-1.21399	7.99e-05
AT1G08920	2.08734	0.000107399		LOC_Os01g09860	-2.59316	7.99e-05
AT1G08960	-1.98821	0.000107399		LOC_Os01g09880	-3.9849	7.99e-05
AT1G08980	2.73552	0.000107399		LOC_Os01g10010	-2.21471	7.99e-05
AT1G09040	-1.55105	0.000107399		LOC_Os01g10020	-2.2858	7.99e-05
AT1G09060	1.60896	0.000107399		LOC_Os01g10040	-1.51583	7.99e-05
AT1G09070	4.03619	0.000107399		LOC_Os01g10050	-0.317215	7.99e-05
AT1G09100	1.06444	0.000107399		LOC_Os01g10080	0.377541	7.99e-05
AT1G09140	3.61198	0.000107399		LOC_Os01g10150	0.790926	7.99e-05
AT1G09150	0.965625	0.000107399		LOC_Os01g10210	-1.12927	7.99e-05
AT1G09160	0.912362	0.000107399		LOC_Os01g10250	0.787917	7.99e-05
AT1G09195	-1.39521	0.000107399		LOC_Os01g10290	0.418406	7.99e-05
AT1G09200	-3.7414	0.000107399		LOC_Os01g10350	-0.654628	7.99e-05
AT1G09230	1.07608	0.000107399		LOC_Os01g10400	3.68339	7.99e-05
AT1G09240	2.18461	0.000107399		LOC_Os01g10440	0.735007	7.99e-05
AT1G09250	1.52707	0.000107399		LOC_Os01g10450	-1.23435	7.99e-05
AT1G09260	inf	0.000107399		LOC_Os01g10460	#NAME?	7.99e-05
AT1G09310	-2.09088	0.000107399		LOC_Os01g10530	-1.5663	7.99e-05
AT1G09320	1.92835	0.000107399		LOC_Os01g10580	0.293601	7.99e-05
AT1G09340	-1.40081	0.000107399		LOC_Os01g10590	#NAME?	7.99e-05
AT1G09350	4.91196	0.000107399		LOC_Os01g10610	1.89311	7.99e-05
AT1G09390	-1.68534	0.000107399		LOC_Os01g10640	-1.31667	7.99e-05
AT1G09430	1.97416	0.000107399		LOC_Os01g10680	0.459012	7.99e-05
AT1G09440	-1.36513	0.000107399		LOC_Os01g10790	0.434921	7.99e-05
AT1G09450	-1.7871	0.000107399		LOC_Os01g10800	-3.3708	7.99e-05
AT1G09460	3.3504	0.000107399		LOC_Os01g10810	0.830824	7.99e-05
AT1G09500	1.66377	0.000107399		LOC_Os01g10820	-0.520747	7.99e-05
AT1G09520	1.26945	0.000107399		LOC_Os01g10840	-0.602322	7.99e-05
AT1G09530	1.956	0.000107399		LOC_Os01g10890	-4.13922	7.99e-05
AT1G09570	2.68701	0.000107399		LOC_Os01g10930	-3.3085	7.99e-05
AT1G09575	2.39264	0.000107399		LOC_Os01g10950	-0.625629	7.99e-05
AT1G09590	-1.82129	0.000107399		LOC_Os01g10990	-3.62989	7.99e-05
AT1G09630	-2.52992	0.000107399		LOC_Os01g11040	-0.344405	7.99e-05
AT1G09640	1.56108	0.000107399		LOC_Os01g11070	-0.321217	7.99e-05
AT1G09645	2.1409	0.000107399		LOC_Os01g11110	0.421045	7.99e-05
AT1G09700	1.12827	0.000107399		LOC_Os01g11120	-0.407914	7.99e-05
AT1G09710	3.2868	0.000107399		LOC_Os01g11160	3.15393	7.99e-05
AT1G09740	2.16814	0.000107399		LOC_Os01g11230	-1.2282	7.99e-05
AT1G09750	-1.55246	0.000107399		LOC_Os01g11240	-1.06469	7.99e-05
AT1G09770	1.16027	0.000107399		LOC_Os01g11250	-1.57548	7.99e-05
AT1G09780	-4.023	0.000107399		LOC_Os01g11260	-0.836102	7.99e-05
AT1G09794	1.23787	0.000107399		LOC_Os01g11340	-0.906092	7.99e-05
AT1G09820	-4.08372	0.000107399		LOC_Os01g11370	-0.362202	7.99e-05
AT1G09830	1.19368	0.000107399		LOC_Os01g11460	6.74794	7.99e-05
AT1G09840	-2.17709	0.000107399		LOC_Os01g11520	1.88227	7.99e-05
AT1G09850	1.18499	0.000107399		LOC_Os01g11550	-2.18537	7.99e-05
AT1G09870	1.3315	0.000107399		LOC_Os01g11580	-0.364567	7.99e-05
AT1G09920	1.48744	0.000107399		LOC_Os01g11590	0.633895	7.99e-05
AT1G09932	-2.143	0.000107399		LOC_Os01g11600	3.5495	7.99e-05
AT1G09940	2.17211	0.000107399		LOC_Os01g11620	-2.12174	7.99e-05
AT1G09950	4.99139	0.000107399		LOC_Os01g11650	-0.804865	7.99e-05
AT1G09960	1.26771	0.000107399		LOC_Os01g11660	-3.12269	7.99e-05
AT1G09970	1.54541	0.000107399		LOC_Os01g11670	-1.00532	7.99e-05
AT1G09980	-1.57004	0.000107399		LOC_Os01g11810	1.15027	7.99e-05
AT1G10020	-1.46181	0.000107399		LOC_Os01g11880	-1.1757	7.99e-05
AT1G10030	-2.04832	0.000107399		LOC_Os01g11910	-2.42686	7.99e-05
AT1G10040	1.47959	0.000107399		LOC_Os01g11952	0.828508	7.99e-05
AT1G10050	2.75432	0.000107399		LOC_Os01g11980	-0.898006	7.99e-05
AT1G10090	1.68728	0.000107399		LOC_Os01g12080	1.31712	7.99e-05
AT1G10095	1.91053	0.000107399		LOC_Os01g12090	0.681013	7.99e-05
AT1G10120	-1.20288	0.000107399		LOC_Os01g12130	-2.30113	7.99e-05
AT1G10130	-0.944673	0.000107399		LOC_Os01g12160	-3.34652	7.99e-05
AT1G10140	4.69943	0.000107399		LOC_Os01g12180	-1.25452	7.99e-05
AT1G10150	2.72726	0.000107399		LOC_Os01g12190	0.486297	7.99e-05
AT1G10170	3.04257	0.000107399		LOC_Os01g12200	0.395701	7.99e-05
AT1G10180	-1.5111	0.000107399		LOC_Os01g12210	1.01444	7.99e-05
AT1G10200	0.984694	0.000107399		LOC_Os01g12220	-0.6026	7.99e-05
AT1G10210	2.58113	0.000107399		LOC_Os01g12260	-1.25722	7.99e-05
AT1G10230	1.19906	0.000107399		LOC_Os01g12270	-2.00197	7.99e-05
AT1G10260	inf	0.000107399		LOC_Os01g12280	-0.623038	7.99e-05
AT1G10280	-2.18869	0.000107399		LOC_Os01g12290	-1.78531	7.99e-05
AT1G10290	-1.31565	0.000107399		LOC_Os01g12304	-2.13278	7.99e-05
AT1G10330	-1.8303	0.000107399		LOC_Os01g12320	-2.13958	7.99e-05
AT1G10360	1.60419	0.000107399		LOC_Os01g12350	-2.37459	7.99e-05
AT1G10370	-1.16458	0.000107399		LOC_Os01g12374	-1.63022	7.99e-05
AT1G10380	-2.43129	0.000107399		LOC_Os01g12381	-2.11585	7.99e-05
AT1G10390	1.91926	0.000107399		LOC_Os01g12400	-1.03891	7.99e-05
AT1G10410	1.08457	0.000107399		LOC_Os01g12440	5.38245	7.99e-05
AT1G10470	-2.23401	0.000107399		LOC_Os01g12470	0.659153	7.99e-05
AT1G10500	1.62767	0.000107399		LOC_Os01g12480	0.797229	7.99e-05
AT1G10510	-0.924799	0.000107399		LOC_Os01g12520	2.52566	7.99e-05
AT1G10520	2.0818	0.000107399		LOC_Os01g12530	1.29305	7.99e-05
AT1G10522	1.92681	0.000107399		LOC_Os01g12540	-0.421455	7.99e-05
AT1G10550	-4.2329	0.000107399		LOC_Os01g12550	-0.492133	7.99e-05
AT1G10570	-1.96816	0.000107399		LOC_Os01g12560	1.49973	7.99e-05
AT1G10590	1.4355	0.000107399		LOC_Os01g12640	-2.30878	7.99e-05
AT1G10600	1.79644	0.000107399		LOC_Os01g12650	-2.1265	7.99e-05
AT1G10610	1.16667	0.000107399		LOC_Os01g12670	0.671746	7.99e-05
AT1G10640	-5.20308	0.000107399		LOC_Os01g12710	3.75073	7.99e-05
AT1G10700	0.97022	0.000107399		LOC_Os01g12720	-0.763333	7.99e-05
AT1G10760	-1.66631	0.000107399		LOC_Os01g12740	-2.12691	7.99e-05
AT1G10780	-4.19298	0.000107399		LOC_Os01g12750	-1.41963	7.99e-05
AT1G10830	1.24944	0.000107399		LOC_Os01g12760	1.39558	7.99e-05
AT1G10840	1.82473	0.000107399		LOC_Os01g12770	1.56272	7.99e-05
AT1G10865	2.36442	0.000107399		LOC_Os01g12790	-1.4871	7.99e-05
AT1G10890	1.77598	0.000107399		LOC_Os01g12810	3.94473	7.99e-05
AT1G10900	-1.74045	0.000107399		LOC_Os01g12830	1.75697	7.99e-05
AT1G10940	0.959649	0.000107399		LOC_Os01g12840	-1.03291	7.99e-05
AT1G10960	1.90868	0.000107399		LOC_Os01g12880	0.756512	7.99e-05
AT1G10970	2.5086	0.000107399		LOC_Os01g12890	0.665429	7.99e-05
AT1G10980	-1.77068	0.000107399		LOC_Os01g12900	-1.32965	7.99e-05
AT1G10990	-1.71147	0.000107399		LOC_Os01g12920	-0.721231	7.99e-05
AT1G11050	-1.52135	0.000107399		LOC_Os01g13000	-1.59576	7.99e-05
AT1G11130	-1.29778	0.000107399		LOC_Os01g13030	-0.953866	7.99e-05
AT1G11175	4.07899	0.000107399		LOC_Os01g13060	1.28805	7.99e-05
AT1G11180	1.52518	0.000107399		LOC_Os01g13080	-2.74932	7.99e-05
AT1G11190	-3.11574	0.000107399		LOC_Os01g13090	-0.848693	7.99e-05
AT1G11200	-2.29674	0.000107399		LOC_Os01g13100	0.402421	7.99e-05
AT1G11210	1.82707	0.000107399		LOC_Os01g13120	-1.89495	7.99e-05
AT1G11220	-2.58655	0.000107399		LOC_Os01g13150	-0.416835	7.99e-05
AT1G11240	2.11074	0.000107399		LOC_Os01g13160	-0.339354	7.99e-05
AT1G11260	4.23511	0.000107399		LOC_Os01g13170	1.20556	7.99e-05
AT1G11270	4.75538	0.000107399		LOC_Os01g13190	-0.259853	7.99e-05
AT1G11280	-2.03795	0.000107399		LOC_Os01g13200	-0.514323	7.99e-05
AT1G11290	-1.27456	0.000107399		LOC_Os01g13260	-1.7356	7.99e-05
AT1G11300	-1.84461	0.000107399		LOC_Os01g13300	0.850474	7.99e-05
AT1G11330	-3.59809	0.000107399		LOC_Os01g13320	-1.09213	7.99e-05
AT1G11380	1.65811	0.000107399		LOC_Os01g13370	2.50538	7.99e-05
AT1G11400	3.74265	0.000107399		LOC_Os01g13404	1.38729	7.99e-05
AT1G11440	-1.43456	0.000107399		LOC_Os01g13420	-1.43983	7.99e-05
AT1G11480	2.76197	0.000107399		LOC_Os01g13460	1.17757	7.99e-05
AT1G11530	2.22079	0.000107399		LOC_Os01g13480	0.580629	7.99e-05
AT1G11545	-2.17155	0.000107399		LOC_Os01g13520	-1.30417	7.99e-05
AT1G11580	-1.63117	0.000107399		LOC_Os01g13550	-0.638956	7.99e-05
AT1G11592	1.409	0.000107399		LOC_Os01g13560	4.05344	7.99e-05
AT1G11600	-1.36337	0.000107399		LOC_Os01g13570	0.634047	7.99e-05
AT1G11660	1.71299	0.000107399		LOC_Os01g13660	0.336122	7.99e-05
AT1G11670	-3.39202	0.000107399		LOC_Os01g13690	-2.19386	7.99e-05
AT1G11680	-0.970327	0.000107399		LOC_Os01g13700	-0.555527	7.99e-05
AT1G11700	-4.98531	0.000107399		LOC_Os01g13720	-1.34847	7.99e-05
AT1G11720	-4.00893	0.000107399		LOC_Os01g13740	0.82053	7.99e-05
AT1G11730	-2.18457	0.000107399		LOC_Os01g13780	1.9961	7.99e-05
AT1G11760	1.48876	0.000107399		LOC_Os01g13800	-1.71889	7.99e-05
AT1G11790	-1.15817	0.000107399		LOC_Os01g13930	1.04935	7.99e-05
AT1G11820	1.05829	0.000107399		LOC_Os01g14020	0.465539	7.99e-05
AT1G11850	-4.31366	0.000107399		LOC_Os01g14040	1.77417	7.99e-05
AT1G11860	-1.44151	0.000107399		LOC_Os01g14050	0.658788	7.99e-05
AT1G11870	-1.72212	0.000107399		LOC_Os01g14070	1.61692	7.99e-05
AT1G11905	-1.86246	0.000107399		LOC_Os01g14080	0.754769	7.99e-05
AT1G11910	1.24328	0.000107399		LOC_Os01g14090	-0.655118	7.99e-05
AT1G11930	0.935304	0.000107399		LOC_Os01g14100	-0.568577	7.99e-05
AT1G11940	-1.75743	0.000107399		LOC_Os01g14370	0.279635	7.99e-05
AT1G11960	3.0159	0.000107399		LOC_Os01g14420	1.78611	7.99e-05
AT1G12000	-3.22331	0.000107399		LOC_Os01g14440	4.27481	7.99e-05
AT1G12010	1.1989	0.000107399		LOC_Os01g14510	-0.996994	7.99e-05
AT1G12040	inf	0.000107399		LOC_Os01g14514	-1.33909	7.99e-05
AT1G12060	2.91919	0.000107399		LOC_Os01g14610	0.49557	7.99e-05
AT1G12090	-2.58068	0.000107399		LOC_Os01g14630	-4.15224	7.99e-05
AT1G12110	-4.06359	0.000107399		LOC_Os01g14670	-3.00412	7.99e-05
AT1G12120	-1.39298	0.000107399		LOC_Os01g14690	1.18084	7.99e-05
AT1G12140	-1.73196	0.000107399		LOC_Os01g14770	-1.27302	7.99e-05
AT1G12200	-2.45652	0.000107399		LOC_Os01g14810	0.320496	7.99e-05
AT1G12210	-1.62876	0.000107399		LOC_Os01g14820	-0.397191	7.99e-05
AT1G12220	1.0104	0.000107399		LOC_Os01g14830	-0.411104	7.99e-05
AT1G12244	-1.40636	0.000107399		LOC_Os01g14840	-1.50895	7.99e-05
AT1G12270	1.91027	0.000107399		LOC_Os01g14860	1.24731	7.99e-05
AT1G12290	2.95182	0.000107399		LOC_Os01g14870	3.45753	7.99e-05
AT1G12300	-1.73907	0.000107399		LOC_Os01g14890	0.95881	7.99e-05
AT1G12310	-1.17137	0.000107399		LOC_Os01g14920	-0.827066	7.99e-05
AT1G12380	-3.79375	0.000107399		LOC_Os01g14950	0.269977	7.99e-05
AT1G12400	-1.21114	0.000107399		LOC_Os01g14980	-1.30821	7.99e-05
AT1G12430	-1.06522	0.000107399		LOC_Os01g15000	3.73388	7.99e-05
AT1G12440	1.00249	0.000107399		LOC_Os01g15010	0.584676	7.99e-05
AT1G12460	-2.43789	0.000107399		LOC_Os01g15029	1.24172	7.99e-05
AT1G12470	1.07641	0.000107399		LOC_Os01g15110	0.985648	7.99e-05
AT1G12500	-1.48704	0.000107399		LOC_Os01g15120	1.18162	7.99e-05
AT1G12520	1.32162	0.000107399		LOC_Os01g15270	3.07877	7.99e-05
AT1G12550	-2.04488	0.000107399		LOC_Os01g15310	1.00868	7.99e-05
AT1G12570	-2.91162	0.000107399		LOC_Os01g15320	-3.3105	7.99e-05
AT1G12620	-1.47536	0.000107399		LOC_Os01g15350	1.49786	7.99e-05
AT1G12640	1.97014	0.000107399		LOC_Os01g15390	-1.2699	7.99e-05
AT1G12650	2.30257	0.000107399		LOC_Os01g15399	-2.72134	7.99e-05
AT1G12672	#NAME?	0.000107399		LOC_Os01g15460	0.489065	7.99e-05
AT1G12680	1.4996	0.000107399		LOC_Os01g15470	-1.45556	7.99e-05
AT1G12710	2.50483	0.000107399		LOC_Os01g15480	4.1281	7.99e-05
AT1G12730	2.3379	0.000107399		LOC_Os01g15490	0.557264	7.99e-05
AT1G12750	-1.44089	0.000107399		LOC_Os01g15600	-1.25088	7.99e-05
AT1G12760	1.64568	0.000107399		LOC_Os01g15610	-1.02457	7.99e-05
AT1G12770	1.48842	0.000107399		LOC_Os01g15630	1.05182	7.99e-05
AT1G12780	4.96919	0.000107399		LOC_Os01g15640	2.53948	7.99e-05
AT1G12790	2.23788	0.000107399		LOC_Os01g15650	3.46769	7.99e-05
AT1G12800	-1.62185	0.000107399		LOC_Os01g15660	0.804983	7.99e-05
AT1G12805	#NAME?	0.000107399		LOC_Os01g15770	-1.72301	7.99e-05
AT1G12810	2.33115	0.000107399		LOC_Os01g15780	-0.612169	7.99e-05
AT1G12830	2.83548	0.000107399		LOC_Os01g15790	-0.408235	7.99e-05
AT1G12845	-1.39931	0.000107399		LOC_Os01g15860	2.0088	7.99e-05
AT1G12850	-1.26236	0.000107399		LOC_Os01g15890	2.56751	7.99e-05
AT1G12860	-1.4711	0.000107399		LOC_Os01g15900	4.76247	7.99e-05
AT1G12880	-2.10968	0.000107399		LOC_Os01g15979	2.2196	7.99e-05
AT1G12900	-2.85883	0.000107399		LOC_Os01g16000	-0.799974	7.99e-05
AT1G12910	2.06181	0.000107399		LOC_Os01g16010	1.21187	7.99e-05
AT1G12920	0.966323	0.000107399		LOC_Os01g16040	-1.11347	7.99e-05
AT1G12930	-2.03244	0.000107399		LOC_Os01g16080	0.720654	7.99e-05
AT1G12970	3.01699	0.000107399		LOC_Os01g16090	-0.714661	7.99e-05
AT1G13000	-1.01606	0.000107399		LOC_Os01g16100	-1.80085	7.99e-05
AT1G13080	1.95194	0.000107399		LOC_Os01g16110	-0.914847	7.99e-05
AT1G13100	-2.80561	0.000107399		LOC_Os01g16120	-1.585	7.99e-05
AT1G13110	-2.90443	0.000107399		LOC_Os01g16124	-1.50659	7.99e-05
AT1G13170	-4.07942	0.000107399		LOC_Os01g16130	-1.38123	7.99e-05
AT1G13190	1.96729	0.000107399		LOC_Os01g16146	-1.44815	7.99e-05
AT1G13210	-1.44976	0.000107399		LOC_Os01g16152	-0.445873	7.99e-05
AT1G13245	2.26218	0.000107399		LOC_Os01g16170	1.64035	7.99e-05
AT1G13340	4.56712	0.000107399		LOC_Os01g16180	-0.462713	7.99e-05
AT1G13350	0.884325	0.000107399		LOC_Os01g16190	1.53758	7.99e-05
AT1G13360	2.12936	0.000107399		LOC_Os01g16210	0.487896	7.99e-05
AT1G13380	1.61279	0.000107399		LOC_Os01g16220	1.50789	7.99e-05
AT1G13390	2.17921	0.000107399		LOC_Os01g16240	-0.599197	7.99e-05
AT1G13440	-1.28575	0.000107399		LOC_Os01g16260	-0.994485	7.99e-05
AT1G13450	4.39203	0.000107399		LOC_Os01g16310	1.9848	7.99e-05
AT1G13470	-2.41306	0.000107399		LOC_Os01g16320	inf	7.99e-05
AT1G13520	3.11111	0.000107399		LOC_Os01g16330	0.615549	7.99e-05
AT1G13580	-3.12365	0.000107399		LOC_Os01g16414	-0.516876	7.99e-05
AT1G13609	#NAME?	0.000107399		LOC_Os01g16430	0.326419	7.99e-05
AT1G13650	-1.91437	0.000107399		LOC_Os01g16450	4.1962	7.99e-05
AT1G13690	2.89714	0.000107399		LOC_Os01g16520	0.945455	7.99e-05
AT1G13730	-2.38591	0.000107399		LOC_Os01g16530	-0.863482	7.99e-05
AT1G13750	-3.17282	0.000107399		LOC_Os01g16540	0.869797	7.99e-05
AT1G13770	-1.33416	0.000107399		LOC_Os01g16620	0.622221	7.99e-05
AT1G13860	-2.70451	0.000107399		LOC_Os01g16640	0.839864	7.99e-05
AT1G13870	-1.7134	0.000107399		LOC_Os01g16670	-0.480602	7.99e-05
AT1G13960	1.29891	0.000107399		LOC_Os01g16810	2.60092	7.99e-05
AT1G13970	-2.14517	0.000107399		LOC_Os01g16860	inf	7.99e-05
AT1G13980	-1.61551	0.000107399		LOC_Os01g16870	0.775596	7.99e-05
AT1G13990	4.58549	0.000107399		LOC_Os01g16890	-0.344852	7.99e-05
AT1G14090	1.95683	0.000107399		LOC_Os01g16900	1.71521	7.99e-05
AT1G14150	-1.57369	0.000107399		LOC_Os01g16910	-0.734062	7.99e-05
AT1G14170	-2.45724	0.000107399		LOC_Os01g16940	-0.966722	7.99e-05
AT1G14180	-1.16913	0.000107399		LOC_Os01g16950	-1.01955	7.99e-05
AT1G14200	3.44695	0.000107399		LOC_Os01g16960	0.550639	7.99e-05
AT1G14205	3.29607	0.000107399		LOC_Os01g16980	1.79782	7.99e-05
AT1G14250	-4.14415	0.000107399		LOC_Os01g17000	-2.65683	7.99e-05
AT1G14290	1.76974	0.000107399		LOC_Os01g17020	-0.412813	7.99e-05
AT1G14300	2.85318	0.000107399		LOC_Os01g17050	4.28705	7.99e-05
AT1G14330	1.06904	0.000107399		LOC_Os01g17150	0.23698	7.99e-05
AT1G14345	-3.31694	0.000107399		LOC_Os01g17170	0.321547	7.99e-05
AT1G14360	1.9486	0.000107399		LOC_Os01g17180	-0.859442	7.99e-05
AT1G14380	-2.19028	0.000107399		LOC_Os01g17190	0.421549	7.99e-05
AT1G14400	2.43005	0.000107399		LOC_Os01g17214	-0.393224	7.99e-05
AT1G14410	-1.61845	0.000107399		LOC_Os01g17240	1.56264	7.99e-05
AT1G14430	-2.9866	0.000107399		LOC_Os01g17250	-3.09294	7.99e-05
AT1G14450	1.0624	0.000107399		LOC_Os01g17260	0.739214	7.99e-05
AT1G14460	-2.63616	0.000107399		LOC_Os01g17279	0.774268	7.99e-05
AT1G14480	-1.56648	0.000107399		LOC_Os01g17320	-0.686357	7.99e-05
AT1G14510	1.06425	0.000107399		LOC_Os01g17330	1.76137	7.99e-05
AT1G14530	1.48574	0.000107399		LOC_Os01g17390	2.45274	7.99e-05
AT1G14570	0.997883	0.000107399		LOC_Os01g17396	6.06027	7.99e-05
AT1G14580	-1.63334	0.000107399		LOC_Os01g17430	-0.572648	7.99e-05
AT1G14590	1.08565	0.000107399		LOC_Os01g17470	-1.08606	7.99e-05
AT1G14600	-1.59725	0.000107399		LOC_Os01g18050	-2.05932	7.99e-05
AT1G14620	1.7597	0.000107399		LOC_Os01g18060	-2.05667	7.99e-05
AT1G14630	-3.6895	0.000107399		LOC_Os01g18070	0.430747	7.99e-05
AT1G14650	1.40684	0.000107399		LOC_Os01g18080	0.404755	7.99e-05
AT1G14660	-1.25198	0.000107399		LOC_Os01g18100	2.10025	7.99e-05
AT1G14685	1.94693	0.000107399		LOC_Os01g18170	-3.28738	7.99e-05
AT1G14700	-1.67387	0.000107399		LOC_Os01g18210	-0.441572	7.99e-05
AT1G14740	2.46061	0.000107399		LOC_Os01g18220	2.08802	7.99e-05
AT1G14770	-1.80501	0.000107399		LOC_Os01g18240	-0.878088	7.99e-05
AT1G14790	-1.37387	0.000107399		LOC_Os01g18400	-4.16096	7.99e-05
AT1G14820	-2.07277	0.000107399		LOC_Os01g18584	0.558663	7.99e-05
AT1G14840	-3.38784	0.000107399		LOC_Os01g18630	-0.931157	7.99e-05
AT1G14870	1.95373	0.000107399		LOC_Os01g18640	-0.65989	7.99e-05
AT1G14880	-1.66851	0.000107399		LOC_Os01g18660	-1.2543	7.99e-05
AT1G14890	2.99155	0.000107399		LOC_Os01g18670	1.0525	7.99e-05
AT1G14910	2.05576	0.000107399		LOC_Os01g18744	-1.76327	7.99e-05
AT1G14970	-1.41903	0.000107399		LOC_Os01g18800	1.64367	7.99e-05
AT1G14980	1.9528	0.000107399		LOC_Os01g18850	1.01104	7.99e-05
AT1G14990	-1.55868	0.000107399		LOC_Os01g18860	-3.85496	7.99e-05
AT1G15000	-2.03323	0.000107399		LOC_Os01g18880	-0.861449	7.99e-05
AT1G15010	3.18879	0.000107399		LOC_Os01g19130	4.49055	7.99e-05
AT1G15080	-3.14027	0.000107399		LOC_Os01g19150	0.7597	7.99e-05
AT1G15125	1.33592	0.000107399		LOC_Os01g19170	-2.06126	7.99e-05
AT1G15130	1.51056	0.000107399		LOC_Os01g19320	inf	7.99e-05
AT1G15140	-1.46421	0.000107399		LOC_Os01g19380	-2.96636	7.99e-05
AT1G15200	1.6421	0.000107399		LOC_Os01g19410	-0.524398	7.99e-05
AT1G15230	4.5437	0.000107399		LOC_Os01g19450	-0.380408	7.99e-05
AT1G15250	1.1254	0.000107399		LOC_Os01g19470	-0.667738	7.99e-05
AT1G15260	-2.7163	0.000107399		LOC_Os01g19490	-0.876156	7.99e-05
AT1G15340	1.04191	0.000107399		LOC_Os01g19610	-2.97715	7.99e-05
AT1G15350	2.23273	0.000107399		LOC_Os01g19630	-1.54097	7.99e-05
AT1G15370	1.36093	0.000107399		LOC_Os01g19670	-2.6428	7.99e-05
AT1G15380	6.22449	0.000107399		LOC_Os01g19740	1.96456	7.99e-05
AT1G15400	2.11653	0.000107399		LOC_Os01g19800	2.37702	7.99e-05
AT1G15410	-1.29546	0.000107399		LOC_Os01g19820	-3.43548	7.99e-05
AT1G15420	2.95519	0.000107399		LOC_Os01g19840	-0.98018	7.99e-05
AT1G15430	1.42187	0.000107399		LOC_Os01g19940	0.998323	7.99e-05
AT1G15440	2.06488	0.000107399		LOC_Os01g19970	-2.99338	7.99e-05
AT1G15470	-3.14898	0.000107399		LOC_Os01g20030	inf	7.99e-05
AT1G15480	1.08118	0.000107399		LOC_Os01g20110	-1.2158	7.99e-05
AT1G15490	-2.91184	0.000107399		LOC_Os01g20206	4.45435	7.99e-05
AT1G15530	1.42822	0.000107399		LOC_Os01g20820	1.03215	7.99e-05
AT1G15550	2.3246	0.000107399		LOC_Os01g20830	-2.39498	7.99e-05
AT1G15570	-2.61826	0.000107399		LOC_Os01g20840	0.826675	7.99e-05
AT1G15660	-1.74886	0.000107399		LOC_Os01g20880	-1.55421	7.99e-05
AT1G15670	3.43123	0.000107399		LOC_Os01g20890	-0.411555	7.99e-05
AT1G15710	-1.02813	0.000107399		LOC_Os01g20894	-1.07538	7.99e-05
AT1G15740	2.29276	0.000107399		LOC_Os01g20900	0.400566	7.99e-05
AT1G15760	-2.92631	0.000107399		LOC_Os01g20940	-1.152	7.99e-05
AT1G15790	1.20739	0.000107399		LOC_Os01g21034	-3.22349	7.99e-05
AT1G15800	2.83382	0.000107399		LOC_Os01g21120	5.36248	7.99e-05
AT1G15830	3.96053	0.000107399		LOC_Os01g21144	3.49861	7.99e-05
AT1G15840	inf	0.000107399		LOC_Os01g21160	0.741541	7.99e-05
AT1G15860	2.22786	0.000107399		LOC_Os01g21170	-2.35611	7.99e-05
AT1G15870	2.95602	0.000107399		LOC_Os01g21240	4.45651	7.99e-05
AT1G15880	1.63292	0.000107399		LOC_Os01g21250	8.17725	7.99e-05
AT1G15910	-1.12927	0.000107399		LOC_Os01g21320	0.911366	7.99e-05
AT1G15920	3.1025	0.000107399		LOC_Os01g21420	0.937728	7.99e-05
AT1G15940	1.77565	0.000107399		LOC_Os01g21450	0.890065	7.99e-05
AT1G15980	-1.92399	0.000107399		LOC_Os01g21610	0.873182	7.99e-05
AT1G16000	1.59014	0.000107399		LOC_Os01g21850	-0.483054	7.99e-05
AT1G16010	1.69296	0.000107399		LOC_Os01g21860	0.770969	7.99e-05
AT1G16020	-1.56067	0.000107399		LOC_Os01g21940	-0.864321	7.99e-05
AT1G16030	9.44474	0.000107399		LOC_Os01g21960	-2.8991	7.99e-05
AT1G16040	1.36908	0.000107399		LOC_Os01g22010	0.948317	7.99e-05
AT1G16060	-3.99353	0.000107399		LOC_Os01g22070	-0.582798	7.99e-05
AT1G16090	-2.03924	0.000107399		LOC_Os01g22090	-1.6824	7.99e-05
AT1G16170	-1.11224	0.000107399		LOC_Os01g22249	0.992522	7.99e-05
AT1G16180	2.11405	0.000107399		LOC_Os01g22370	-0.473159	7.99e-05
AT1G16210	3.05588	0.000107399		LOC_Os01g22390	-0.593109	7.99e-05
AT1G16220	-3.24056	0.000107399		LOC_Os01g22430	-1.63163	7.99e-05
AT1G16240	3.29605	0.000107399		LOC_Os01g22480	-2.24265	7.99e-05
AT1G16250	1.71001	0.000107399		LOC_Os01g22490	-0.458482	7.99e-05
AT1G16260	-1.16481	0.000107399		LOC_Os01g22500	0.638352	7.99e-05
AT1G16280	2.24225	0.000107399		LOC_Os01g22510	1.98419	7.99e-05
AT1G16300	-1.91068	0.000107399		LOC_Os01g22520	-0.433695	7.99e-05
AT1G16310	-1.81041	0.000107399		LOC_Os01g22550	-1.26872	7.99e-05
AT1G16320	1.50721	0.000107399		LOC_Os01g22590	inf	7.99e-05
AT1G16350	2.01035	0.000107399		LOC_Os01g22600	3.02887	7.99e-05
AT1G16390	-2.08104	0.000107399		LOC_Os01g22630	2.26812	7.99e-05
AT1G16400	-4.62497	0.000107399		LOC_Os01g22640	-0.890173	7.99e-05
AT1G16410	-4.80313	0.000107399		LOC_Os01g22780	-2.25461	7.99e-05
AT1G16420	-2.20279	0.000107399		LOC_Os01g22900	3.14645	7.99e-05
AT1G16460	-1.59211	0.000107399		LOC_Os01g22990	-2.52554	7.99e-05
AT1G16480	-1.87516	0.000107399		LOC_Os01g23380	-1.51837	7.99e-05
AT1G16500	-1.83278	0.000107399		LOC_Os01g23590	0.291366	7.99e-05
AT1G16510	-1.43435	0.000107399		LOC_Os01g23600	-0.834102	7.99e-05
AT1G16550	-2.31368	0.000107399		LOC_Os01g23610	-0.959114	7.99e-05
AT1G16590	-1.90591	0.000107399		LOC_Os01g23630	1.08063	7.99e-05
AT1G16610	1.75002	0.000107399		LOC_Os01g23680	0.869846	7.99e-05
AT1G16630	-1.29383	0.000107399		LOC_Os01g23710	1.92454	7.99e-05
AT1G16640	-2.41711	0.000107399		LOC_Os01g23740	-0.499493	7.99e-05
AT1G16650	1.07363	0.000107399		LOC_Os01g23990	1.3967	7.99e-05
AT1G16690	-2.49916	0.000107399		LOC_Os01g24070	1.13161	7.99e-05
AT1G16720	-1.16448	0.000107399		LOC_Os01g24090	-0.776659	7.99e-05
AT1G16750	-1.33408	0.000107399		LOC_Os01g24420	-1.98336	7.99e-05
AT1G16780	-2.25292	0.000107399		LOC_Os01g24490	-3.02638	7.99e-05
AT1G16800	-2.49627	0.000107399		LOC_Os01g24680	-1.23934	7.99e-05
AT1G16810	1.56131	0.000107399		LOC_Os01g24690	-0.960219	7.99e-05
AT1G16840	2.08694	0.000107399		LOC_Os01g24710	-0.551881	7.99e-05
AT1G16850	4.24665	0.000107399		LOC_Os01g24750	1.01546	7.99e-05
AT1G16870	1.30686	0.000107399		LOC_Os01g24764	-0.401068	7.99e-05
AT1G17020	3.37193	0.000107399		LOC_Os01g24780	-2.09726	7.99e-05
AT1G17050	-2.92817	0.000107399		LOC_Os01g24790	-2.29544	7.99e-05
AT1G17080	1.8685	0.000107399		LOC_Os01g24880	0.669001	7.99e-05
AT1G17090	-2.02964	0.000107399		LOC_Os01g24980	-1.70247	7.99e-05
AT1G17120	-1.73505	0.000107399		LOC_Os01g25065	7.79695	7.99e-05
AT1G17130	1.52335	0.000107399		LOC_Os01g25189	-1.31716	7.99e-05
AT1G17145	3.60323	0.000107399		LOC_Os01g25320	0.93304	7.99e-05
AT1G17190	-2.49926	0.000107399		LOC_Os01g25330	-0.38024	7.99e-05
AT1G17220	-1.5311	0.000107399		LOC_Os01g25370	0.404058	7.99e-05
AT1G17250	-2.13681	0.000107399		LOC_Os01g25386	1.57104	7.99e-05
AT1G17270	-1.25377	0.000107399		LOC_Os01g25440	0.615959	7.99e-05
AT1G17280	1.35075	0.000107399		LOC_Os01g25460	#NAME?	7.99e-05
AT1G17290	1.10333	0.000107399		LOC_Os01g25530	-0.550559	7.99e-05
AT1G17360	-3.06621	0.000107399		LOC_Os01g25540	0.784751	7.99e-05
AT1G17370	0.870121	0.000107399		LOC_Os01g25600	0.688677	7.99e-05
AT1G17410	1.88405	0.000107399		LOC_Os01g25720	-1.46934	7.99e-05
AT1G17460	2.52796	0.000107399		LOC_Os01g25740	-3.06768	7.99e-05
AT1G17470	1.18736	0.000107399		LOC_Os01g25760	-1.64307	7.99e-05
AT1G17480	-4.62189	0.000107399		LOC_Os01g25810	-0.84	7.99e-05
AT1G17500	-1.7979	0.000107399		LOC_Os01g25820	-0.658554	7.99e-05
AT1G17510	-1.61935	0.000107399		LOC_Os01g25880	1.13606	7.99e-05
AT1G17520	1.27166	0.000107399		LOC_Os01g25910	inf	7.99e-05
AT1G17530	2.53796	0.000107399		LOC_Os01g25990	0.781381	7.99e-05
AT1G17560	-3.12283	0.000107399		LOC_Os01g26020	-0.848314	7.99e-05
AT1G17580	-1.9096	0.000107399		LOC_Os01g26039	2.11006	7.99e-05
AT1G17600	-2.74187	0.000107399		LOC_Os01g26120	-2.50583	7.99e-05
AT1G17610	-2.69536	0.000107399		LOC_Os01g26174	-2.05811	7.99e-05
AT1G17630	-2.27723	0.000107399		LOC_Os01g26210	-3.90986	7.99e-05
AT1G17665	1.51848	0.000107399		LOC_Os01g26240	-4.36976	7.99e-05
AT1G17745	-2.63105	0.000107399		LOC_Os01g26270	-4.39477	7.99e-05
AT1G17780	3.06376	0.000107399		LOC_Os01g26280	-3.62006	7.99e-05
AT1G17840	-1.25672	0.000107399		LOC_Os01g26310	#NAME?	7.99e-05
AT1G17870	6.38202	0.000107399		LOC_Os01g26340	-2.54553	7.99e-05
AT1G17880	1.28741	0.000107399		LOC_Os01g26370	-2.20051	7.99e-05
AT1G17890	-1.74753	0.000107399		LOC_Os01g26920	-1.12415	7.99e-05
AT1G17920	-3.1092	0.000107399		LOC_Os01g26940	0.631673	7.99e-05
AT1G17970	1.44143	0.000107399		LOC_Os01g27020	0.50513	7.99e-05
AT1G18030	2.7754	0.000107399		LOC_Os01g27040	-0.687462	7.99e-05
AT1G18090	-1.55721	0.000107399		LOC_Os01g27050	-2.51505	7.99e-05
AT1G18140	-3.70105	0.000107399		LOC_Os01g27120	-2.24793	7.99e-05
AT1G18170	-1.36284	0.000107399		LOC_Os01g27140	-6.31998	7.99e-05
AT1G18250	-4.30397	0.000107399		LOC_Os01g27150	0.782192	7.99e-05
AT1G18260	2.90863	0.000107399		LOC_Os01g27230	0.418868	7.99e-05
AT1G18265	-2.98254	0.000107399		LOC_Os01g27360	2.98719	7.99e-05
AT1G18300	2.09214	0.000107399		LOC_Os01g27520	-0.841703	7.99e-05
AT1G18320	2.23577	0.000107399		LOC_Os01g27590	0.62669	7.99e-05
AT1G18330	6.85354	0.000107399		LOC_Os01g27740	-1.76161	7.99e-05
AT1G18340	-2.03015	0.000107399		LOC_Os01g27750	-0.763259	7.99e-05
AT1G18370	-5.70411	0.000107399		LOC_Os01g27940	0.40841	7.99e-05
AT1G18390	1.02236	0.000107399		LOC_Os01g28500	-3.97751	7.99e-05
AT1G18460	1.85004	0.000107399		LOC_Os01g28680	1.22454	7.99e-05
AT1G18470	1.91213	0.000107399		LOC_Os01g28690	-1.90615	7.99e-05
AT1G18485	-1.25583	0.000107399		LOC_Os01g28730	2.0549	7.99e-05
AT1G18500	1.01913	0.000107399		LOC_Os01g28790	3.75272	7.99e-05
AT1G18550	-3.45174	0.000107399		LOC_Os01g28840	2.32983	7.99e-05
AT1G18560	-2.35852	0.000107399		LOC_Os01g28989	0.891228	7.99e-05
AT1G18580	-1.22446	0.000107399		LOC_Os01g29150	-3.19623	7.99e-05
AT1G18590	-1.63817	0.000107399		LOC_Os01g29180	-2.16585	7.99e-05
AT1G18600	-1.57475	0.000107399		LOC_Os01g29220	-2.79695	7.99e-05
AT1G18670	-2.10347	0.000107399		LOC_Os01g29230	-1.30625	7.99e-05
AT1G18680	1.96326	0.000107399		LOC_Os01g29330	3.33542	7.99e-05
AT1G18700	1.21979	0.000107399		LOC_Os01g29390	0.450497	7.99e-05
AT1G18710	-1.80178	0.000107399		LOC_Os01g29430	-0.691361	7.99e-05
AT1G18740	1.50239	0.000107399		LOC_Os01g29469	1.4009	7.99e-05
AT1G18750	1.88076	0.000107399		LOC_Os01g29507	-1.66763	7.99e-05
AT1G18800	1.59195	0.000107399		LOC_Os01g29740	-0.563429	7.99e-05
AT1G18840	-3.61575	0.000107399		LOC_Os01g29820	-1.00047	7.99e-05
AT1G18850	1.40645	0.000107399		LOC_Os01g31010	#NAME?	7.99e-05
AT1G18900	-2.31209	0.000107399		LOC_Os01g31020	#NAME?	7.99e-05
AT1G19000	2.94934	0.000107399		LOC_Os01g31050	#NAME?	7.99e-05
AT1G19010	1.72892	0.000107399		LOC_Os01g31110	-1.561	7.99e-05
AT1G19020	1.26582	0.000107399		LOC_Os01g31360	1.0014	7.99e-05
AT1G19050	-1.90697	0.000107399		LOC_Os01g31370	7.10136	7.99e-05
AT1G19150	-1.04747	0.000107399		LOC_Os01g31470	0.460456	7.99e-05
AT1G19170	-1.30595	0.000107399		LOC_Os01g31690	0.379486	7.99e-05
AT1G19180	1.60554	0.000107399		LOC_Os01g31770	0.382068	7.99e-05
AT1G19190	2.26437	0.000107399		LOC_Os01g31810	0.616716	7.99e-05
AT1G19240	2.0394	0.000107399		LOC_Os01g31870	-1.3389	7.99e-05
AT1G19270	1.37097	0.000107399		LOC_Os01g31940	-0.81176	7.99e-05
AT1G19310	1.29691	0.000107399		LOC_Os01g32080	0.871164	7.99e-05
AT1G19330	-1.93966	0.000107399		LOC_Os01g32090	1.44547	7.99e-05
AT1G19340	-3.15862	0.000107399		LOC_Os01g32130	-0.552194	7.99e-05
AT1G19350	-1.3081	0.000107399		LOC_Os01g32170	-0.956828	7.99e-05
AT1G19360	-1.54887	0.000107399		LOC_Os01g32184	0.676071	7.99e-05
AT1G19380	-2.33979	0.000107399		LOC_Os01g32300	0.401123	7.99e-05
AT1G19396	3.40133	0.000107399		LOC_Os01g32330	-0.956149	7.99e-05
AT1G19397	2.59235	0.000107399		LOC_Os01g32460	2.35857	7.99e-05
AT1G19400	2.68327	0.000107399		LOC_Os01g32470	inf	7.99e-05
AT1G19430	-1.32172	0.000107399		LOC_Os01g32660	1.43924	7.99e-05
AT1G19440	-2.95635	0.000107399		LOC_Os01g32670	3.2524	7.99e-05
AT1G19450	-2.06521	0.000107399		LOC_Os01g32710	-0.750489	7.99e-05
AT1G19480	-2.58656	0.000107399		LOC_Os01g32730	-0.34929	7.99e-05
AT1G19490	1.80756	0.000107399		LOC_Os01g32750	0.672312	7.99e-05
AT1G19510	-3.26835	0.000107399		LOC_Os01g32770	0.553136	7.99e-05
AT1G19520	-2.28976	0.000107399		LOC_Os01g32780	0.803189	7.99e-05
AT1G19530	4.61598	0.000107399		LOC_Os01g32790	-0.612631	7.99e-05
AT1G19540	1.7333	0.000107399		LOC_Os01g32830	-1.19913	7.99e-05
AT1G19580	1.11283	0.000107399		LOC_Os01g32849	1.42281	7.99e-05
AT1G19600	1.90791	0.000107399		LOC_Os01g32870	0.45301	7.99e-05
AT1G19610	6.71355	0.000107399		LOC_Os01g32880	-1.25512	7.99e-05
AT1G19640	-1.31111	0.000107399		LOC_Os01g32964	2.10574	7.99e-05
AT1G19650	-1.98745	0.000107399		LOC_Os01g32980	1.28963	7.99e-05
AT1G19660	1.915	0.000107399		LOC_Os01g33000	1.22665	7.99e-05
AT1G19670	-2.67516	0.000107399		LOC_Os01g33020	0.801933	7.99e-05
AT1G19680	-1.68963	0.000107399		LOC_Os01g33050	0.509833	7.99e-05
AT1G19730	-1.7806	0.000107399		LOC_Os01g33204	-0.467342	7.99e-05
AT1G19770	2.27231	0.000107399		LOC_Os01g33230	-1.51985	7.99e-05
AT1G19850	-2.08974	0.000107399		LOC_Os01g33420	-0.687768	7.99e-05
AT1G19860	1.039	0.000107399		LOC_Os01g33490	-1.55971	7.99e-05
AT1G19910	1.0435	0.000107399		LOC_Os01g33540	-0.871468	7.99e-05
AT1G19920	-2.65316	0.000107399		LOC_Os01g33684	-1.19809	7.99e-05
AT1G19940	-3.37268	0.000107399		LOC_Os01g33710	-2.48571	7.99e-05
AT1G19950	-1.46938	0.000107399		LOC_Os01g33784	-0.497351	7.99e-05
AT1G19960	-2.05068	0.000107399		LOC_Os01g33800	0.789386	7.99e-05
AT1G19980	3.27023	0.000107399		LOC_Os01g34020	inf	7.99e-05
AT1G20030	4.80992	0.000107399		LOC_Os01g34060	-0.830794	7.99e-05
AT1G20060	-3.07292	0.000107399		LOC_Os01g34080	-1.39298	7.99e-05
AT1G20070	-1.41737	0.000107399		LOC_Os01g34200	0.388273	7.99e-05
AT1G20100	2.08109	0.000107399		LOC_Os01g34330	0.528415	7.99e-05
AT1G20120	2.03324	0.000107399		LOC_Os01g34350	-0.783835	7.99e-05
AT1G20130	2.3418	0.000107399		LOC_Os01g34390	0.397263	7.99e-05
AT1G20140	1.91298	0.000107399		LOC_Os01g34480	1.40769	7.99e-05
AT1G20160	1.30636	0.000107399		LOC_Os01g34560	2.23839	7.99e-05
AT1G20190	-2.06647	0.000107399		LOC_Os01g34614	-1.35283	7.99e-05
AT1G20220	1.91361	0.000107399		LOC_Os01g34620	0.829938	7.99e-05
AT1G20225	1.93237	0.000107399		LOC_Os01g34660	0.915176	7.99e-05
AT1G20270	1.16781	0.000107399		LOC_Os01g34670	-0.852545	7.99e-05
AT1G20300	-1.37498	0.000107399		LOC_Os01g34780	0.716541	7.99e-05
AT1G20330	-1.08507	0.000107399		LOC_Os01g34860	-1.28029	7.99e-05
AT1G20350	4.41417	0.000107399		LOC_Os01g34880	-2.06864	7.99e-05
AT1G20380	-1.4634	0.000107399		LOC_Os01g34890	-2.54077	7.99e-05
AT1G20390	-3.77467	0.000107399		LOC_Os01g35030	-1.53521	7.99e-05
AT1G20410	-1.89621	0.000107399		LOC_Os01g35040	1.22063	7.99e-05
AT1G20440	4.53356	0.000107399		LOC_Os01g35050	-1.26429	7.99e-05
AT1G20450	3.22008	0.000107399		LOC_Os01g35170	-1.33417	7.99e-05
AT1G20460	1.17332	0.000107399		LOC_Os01g35184	0.398796	7.99e-05
AT1G20510	-1.46783	0.000107399		LOC_Os01g35330	-2.30034	7.99e-05
AT1G20580	1.97421	0.000107399		LOC_Os01g35789	-0.5492	7.99e-05
AT1G20610	-3.07265	0.000107399		LOC_Os01g35830	-0.84478	7.99e-05
AT1G20620	2.25093	0.000107399		LOC_Os01g35990	1.29403	7.99e-05
AT1G20630	2.37662	0.000107399		LOC_Os01g36070	-0.389906	7.99e-05
AT1G20640	2.43634	0.000107399		LOC_Os01g36080	1.2852	7.99e-05
AT1G20691	2.73132	0.000107399		LOC_Os01g36220	-2.52572	7.99e-05
AT1G20693	-1.97225	0.000107399		LOC_Os01g36229	-4.26422	7.99e-05
AT1G20696	-1.49936	0.000107399		LOC_Os01g36294	-2.57612	7.99e-05
AT1G20720	-3.67215	0.000107399		LOC_Os01g36350	-4.82355	7.99e-05
AT1G20780	-1.06489	0.000107399		LOC_Os01g36460	-2.29946	7.99e-05
AT1G20816	1.73228	0.000107399		LOC_Os01g36540	-1.65767	7.99e-05
AT1G20823	-0.984917	0.000107399		LOC_Os01g36600	-1.9401	7.99e-05
AT1G20840	-1.59689	0.000107399		LOC_Os01g36610	-2.29118	7.99e-05
AT1G20850	1.08152	0.000107399		LOC_Os01g36620	-0.619664	7.99e-05
AT1G20870	-1.83799	0.000107399		LOC_Os01g36630	-0.804627	7.99e-05
AT1G20880	1.95934	0.000107399		LOC_Os01g36640	-1.3467	7.99e-05
AT1G20890	2.36967	0.000107399		LOC_Os01g36670	-0.338917	7.99e-05
AT1G20900	3.70258	0.000107399		LOC_Os01g36790	-1.91821	7.99e-05
AT1G20910	1.62565	0.000107399		LOC_Os01g36840	0.539062	7.99e-05
AT1G20920	2.04672	0.000107399		LOC_Os01g36860	-0.345573	7.99e-05
AT1G20930	-3.85117	0.000107399		LOC_Os01g36870	-0.55995	7.99e-05
AT1G20950	-2.30494	0.000107399		LOC_Os01g36920	-0.277951	7.99e-05
AT1G20970	1.09843	0.000107399		LOC_Os01g36940	-1.11102	7.99e-05
AT1G21000	4.48223	0.000107399		LOC_Os01g36950	1.15616	7.99e-05
AT1G21010	2.7913	0.000107399		LOC_Os01g37040	1.87712	7.99e-05
AT1G21050	1.16605	0.000107399		LOC_Os01g37050	-1.14632	7.99e-05
AT1G21065	1.18085	0.000107399		LOC_Os01g37080	-1.59811	7.99e-05
AT1G21070	-3.40756	0.000107399		LOC_Os01g37090	-2.40253	7.99e-05
AT1G21080	1.03777	0.000107399		LOC_Os01g37130	0.552712	7.99e-05
AT1G21120	-1.80104	0.000107399		LOC_Os01g37140	inf	7.99e-05
AT1G21140	2.05595	0.000107399		LOC_Os01g37210	0.452451	7.99e-05
AT1G21150	-2.46912	0.000107399		LOC_Os01g37460	-1.51916	7.99e-05
AT1G21170	-1.68215	0.000107399		LOC_Os01g37470	-1.79865	7.99e-05
AT1G21190	1.21887	0.000107399		LOC_Os01g37480	0.468577	7.99e-05
AT1G21240	-3.07884	0.000107399		LOC_Os01g37490	-2.3805	7.99e-05
AT1G21250	-3.53102	0.000107399		LOC_Os01g37510	-2.35773	7.99e-05
AT1G21270	-3.11204	0.000107399		LOC_Os01g37560	1.55726	7.99e-05
AT1G21340	inf	0.000107399		LOC_Os01g37590	1.56817	7.99e-05
AT1G21350	1.10139	0.000107399		LOC_Os01g37630	-0.41063	7.99e-05
AT1G21400	0.976322	0.000107399		LOC_Os01g37690	-0.799646	7.99e-05
AT1G21410	3.64407	0.000107399		LOC_Os01g37770	0.619869	7.99e-05
AT1G21440	-1.62092	0.000107399		LOC_Os01g37800	0.321696	7.99e-05
AT1G21450	2.56756	0.000107399		LOC_Os01g37810	4.43956	7.99e-05
AT1G21460	2.42768	0.000107399		LOC_Os01g37820	-0.537367	7.99e-05
AT1G21525	-1.73199	0.000107399		LOC_Os01g37837	0.887817	7.99e-05
AT1G21529	inf	0.000107399		LOC_Os01g37842	1.38537	7.99e-05
AT1G21550	5.61066	0.000107399		LOC_Os01g37850	-1.38087	7.99e-05
AT1G21560	-1.05624	0.000107399		LOC_Os01g37870	-0.486396	7.99e-05
AT1G21580	1.16641	0.000107399		LOC_Os01g37910	-0.447543	7.99e-05
AT1G21590	-1.08356	0.000107399		LOC_Os01g37920	1.67319	7.99e-05
AT1G21610	1.40294	0.000107399		LOC_Os01g37950	-3.28078	7.99e-05
AT1G21670	2.43941	0.000107399		LOC_Os01g37960	0.636463	7.99e-05
AT1G21680	4.14422	0.000107399		LOC_Os01g38100	-1.02047	7.99e-05
AT1G21710	-1.8577	0.000107399		LOC_Os01g38190	-4.02018	7.99e-05
AT1G21720	1.16034	0.000107399		LOC_Os01g38229	-1.90178	7.99e-05
AT1G21760	4.09951	0.000107399		LOC_Os01g38244	0.689773	7.99e-05
AT1G21780	3.459	0.000107399		LOC_Os01g38480	1.20434	7.99e-05
AT1G21790	2.45652	0.000107399		LOC_Os01g38510	3.72096	7.99e-05
AT1G21810	-3.38906	0.000107399		LOC_Os01g38530	1.14531	7.99e-05
AT1G21830	2.31675	0.000107399		LOC_Os01g38560	#NAME?	7.99e-05
AT1G21880	-2.31197	0.000107399		LOC_Os01g38610	-5.0005	7.99e-05
AT1G21920	3.31833	0.000107399		LOC_Os01g38660	1.00335	7.99e-05
AT1G21930	1.06639	0.000107399		LOC_Os01g38950	0.654571	7.99e-05
AT1G21940	inf	0.000107399		LOC_Os01g38970	-1.99666	7.99e-05
AT1G21980	-1.55014	0.000107399		LOC_Os01g38980	4.61162	7.99e-05
AT1G22020	1.28519	0.000107399		LOC_Os01g38990	2.80045	7.99e-05
AT1G22040	1.98293	0.000107399		LOC_Os01g39000	-0.325119	7.99e-05
AT1G22060	-2.94656	0.000107399		LOC_Os01g39060	-0.783097	7.99e-05
AT1G22110	4.52091	0.000107399		LOC_Os01g39110	-1.16199	7.99e-05
AT1G22140	-1.74838	0.000107399		LOC_Os01g39136	6.93287	7.99e-05
AT1G22160	-1.30783	0.000107399		LOC_Os01g39250	-0.582503	7.99e-05
AT1G22190	3.85924	0.000107399		LOC_Os01g39270	0.708717	7.99e-05
AT1G22270	1.67076	0.000107399		LOC_Os01g39310	0.462393	7.99e-05
AT1G22310	1.20848	0.000107399		LOC_Os01g39330	2.56088	7.99e-05
AT1G22330	-1.21833	0.000107399		LOC_Os01g39380	0.464303	7.99e-05
AT1G22350	1.00962	0.000107399		LOC_Os01g39630	-0.424603	7.99e-05
AT1G22370	2.8332	0.000107399		LOC_Os01g39670	-1.441	7.99e-05
AT1G22380	3.54332	0.000107399		LOC_Os01g39680	-0.605924	7.99e-05
AT1G22400	2.57578	0.000107399		LOC_Os01g39770	-1.03209	7.99e-05
AT1G22403	4.12011	0.000107399		LOC_Os01g39780	-1.17425	7.99e-05
AT1G22410	-1.89069	0.000107399		LOC_Os01g39790	-0.308685	7.99e-05
AT1G22430	-1.13313	0.000107399		LOC_Os01g39800	-0.433833	7.99e-05
AT1G22490	1.27842	0.000107399		LOC_Os01g39810	-1.32256	7.99e-05
AT1G22500	3.16514	0.000107399		LOC_Os01g39860	-2.36702	7.99e-05
AT1G22510	1.4362	0.000107399		LOC_Os01g39960	-0.5302	7.99e-05
AT1G22520	-1.80574	0.000107399		LOC_Os01g39970	2.97313	7.99e-05
AT1G22540	-1.8975	0.000107399		LOC_Os01g40000	-1.36297	7.99e-05
AT1G22550	-1.91237	0.000107399		LOC_Os01g40050	1.27332	7.99e-05
AT1G22570	1.95999	0.000107399		LOC_Os01g40070	5.4183	7.99e-05
AT1G22590	-3.69372	0.000107399		LOC_Os01g40094	1.73326	7.99e-05
AT1G22620	0.943389	0.000107399		LOC_Os01g40200	-1.14042	7.99e-05
AT1G22630	-1.29019	0.000107399		LOC_Os01g40260	4.95006	7.99e-05
AT1G22640	1.34416	0.000107399		LOC_Os01g40280	1.89387	7.99e-05
AT1G22650	-2.77546	0.000107399		LOC_Os01g40310	1.43095	7.99e-05
AT1G22710	-1.64874	0.000107399		LOC_Os01g40340	0.718093	7.99e-05
AT1G22740	1.50091	0.000107399		LOC_Os01g40420	-0.825687	7.99e-05
AT1G22770	2.76814	0.000107399		LOC_Os01g40470	0.304824	7.99e-05
AT1G22790	1.19686	0.000107399		LOC_Os01g40480	-0.780417	7.99e-05
AT1G22870	-1.07384	0.000107399		LOC_Os01g40499	-1.3723	7.99e-05
AT1G22882	-1.07301	0.000107399		LOC_Os01g40590	-1.31512	7.99e-05
AT1G22885	-2.12279	0.000107399		LOC_Os01g40610	0.608558	7.99e-05
AT1G22890	3.31753	0.000107399		LOC_Os01g40630	2.08744	7.99e-05
AT1G22900	-2.67973	0.000107399		LOC_Os01g40640	-0.411183	7.99e-05
AT1G22930	1.60466	0.000107399		LOC_Os01g40650	0.772948	7.99e-05
AT1G22950	1.44294	0.000107399		LOC_Os01g40670	0.891707	7.99e-05
AT1G22985	5.76553	0.000107399		LOC_Os01g40690	1.22375	7.99e-05
AT1G23040	1.91234	0.000107399		LOC_Os01g40700	-3.57793	7.99e-05
AT1G23052	3.43407	0.000107399		LOC_Os01g40720	-2.0312	7.99e-05
AT1G23080	-1.76219	0.000107399		LOC_Os01g40840	0.52994	7.99e-05
AT1G23120	1.95851	0.000107399		LOC_Os01g40870	0.507957	7.99e-05
AT1G23149	1.62788	0.000107399		LOC_Os01g40980	-0.503784	7.99e-05
AT1G23180	2.00585	0.000107399		LOC_Os01g40990	-0.631327	7.99e-05
AT1G23190	-1.92019	0.000107399		LOC_Os01g41010	-0.960089	7.99e-05
AT1G23200	-3.23557	0.000107399		LOC_Os01g41030	-2.31486	7.99e-05
AT1G23205	-5.38251	0.000107399		LOC_Os01g41040	0.792916	7.99e-05
AT1G23220	-0.971327	0.000107399		LOC_Os01g41190	0.584041	7.99e-05
AT1G23260	0.915202	0.000107399		LOC_Os01g41210	-2.05728	7.99e-05
AT1G23340	-3.26676	0.000107399		LOC_Os01g41220	-1.43571	7.99e-05
AT1G23360	-1.56847	0.000107399		LOC_Os01g41240	2.20457	7.99e-05
AT1G23390	2.34017	0.000107399		LOC_Os01g41420	4.38856	7.99e-05
AT1G23410	-3.3562	0.000107399		LOC_Os01g41430	2.06391	7.99e-05
AT1G23460	-1.7085	0.000107399		LOC_Os01g41530	2.36215	7.99e-05
AT1G23480	-1.51047	0.000107399		LOC_Os01g41550	0.715699	7.99e-05
AT1G23530	-2.50038	0.000107399		LOC_Os01g41610	0.482391	7.99e-05
AT1G23550	3.00955	0.000107399		LOC_Os01g41630	-0.379966	7.99e-05
AT1G23710	3.23117	0.000107399		LOC_Os01g41640	-1.32641	7.99e-05
AT1G23740	-1.24637	0.000107399		LOC_Os01g41660	2.04135	7.99e-05
AT1G23780	2.64439	0.000107399		LOC_Os01g41710	0.999403	7.99e-05
AT1G23790	-4.66929	0.000107399		LOC_Os01g41750	-2.89214	7.99e-05
AT1G23800	-2.95839	0.000107399		LOC_Os01g41780	-1.24837	7.99e-05
AT1G23820	1.49648	0.000107399		LOC_Os01g41810	1.38769	7.99e-05
AT1G23840	1.04072	0.000107399		LOC_Os01g41820	-0.737846	7.99e-05
AT1G23850	2.08974	0.000107399		LOC_Os01g41870	-0.758947	7.99e-05
AT1G23860	2.40076	0.000107399		LOC_Os01g41880	-0.5151	7.99e-05
AT1G23870	4.30882	0.000107399		LOC_Os01g41900	3.26149	7.99e-05
AT1G23880	1.52344	0.000107399		LOC_Os01g41930	-1.55003	7.99e-05
AT1G23890	-2.36747	0.000107399		LOC_Os01g41950	-1.11585	7.99e-05
AT1G23950	1.52627	0.000107399		LOC_Os01g41990	3.22823	7.99e-05
AT1G23960	3.02011	0.000107399		LOC_Os01g42000	2.21127	7.99e-05
AT1G24020	-3.51244	0.000107399		LOC_Os01g42010	0.657044	7.99e-05
AT1G24040	1.25845	0.000107399		LOC_Os01g42030	1.8814	7.99e-05
AT1G24070	-4.80698	0.000107399		LOC_Os01g42090	-1.62776	7.99e-05
AT1G24120	-0.857919	0.000107399		LOC_Os01g42120	-2.11826	7.99e-05
AT1G24140	-1.30903	0.000107399		LOC_Os01g42140	0.951712	7.99e-05
AT1G24145	-2.02795	0.000107399		LOC_Os01g42234	2.09911	7.99e-05
AT1G24147	-3.08183	0.000107399		LOC_Os01g42260	0.250921	7.99e-05
AT1G24148	-1.52576	0.000107399		LOC_Os01g42280	-1.16762	7.99e-05
AT1G24170	-1.261	0.000107399		LOC_Os01g42294	-2.12096	7.99e-05
AT1G24210	1.70007	0.000107399		LOC_Os01g42380	1.74294	7.99e-05
AT1G24240	-2.91955	0.000107399		LOC_Os01g42410	0.894746	7.99e-05
AT1G24260	1.98175	0.000107399		LOC_Os01g42430	-0.544732	7.99e-05
AT1G24267	1.3955	0.000107399		LOC_Os01g42460	0.501604	7.99e-05
AT1G24280	-4.51478	0.000107399		LOC_Os01g42490	0.285377	7.99e-05
AT1G24330	2.31118	0.000107399		LOC_Os01g42520	-1.51835	7.99e-05
AT1G24360	-1.55774	0.000107399		LOC_Os01g42620	-1.04589	7.99e-05
AT1G24400	1.11851	0.000107399		LOC_Os01g42630	0.695822	7.99e-05
AT1G24440	3.45846	0.000107399		LOC_Os01g42650	1.06067	7.99e-05
AT1G24470	-3.4165	0.000107399		LOC_Os01g42690	1.50167	7.99e-05
AT1G24560	1.07854	0.000107399		LOC_Os01g42700	2.1422	7.99e-05
AT1G24575	-1.93423	0.000107399		LOC_Os01g42710	-2.31663	7.99e-05
AT1G24625	-1.58468	0.000107399		LOC_Os01g42730	0.606537	7.99e-05
AT1G24764	-2.34921	0.000107399		LOC_Os01g42770	0.445407	7.99e-05
AT1G24880	2.27903	0.000107399		LOC_Os01g42800	0.48443	7.99e-05
AT1G25098	1.67103	0.000107399		LOC_Os01g42810	2.85593	7.99e-05
AT1G25220	1.25431	0.000107399		LOC_Os01g42820	-0.420572	7.99e-05
AT1G25250	-2.31831	0.000107399		LOC_Os01g42830	0.39702	7.99e-05
AT1G25260	1.22252	0.000107399		LOC_Os01g42850	0.827698	7.99e-05
AT1G25360	-3.31547	0.000107399		LOC_Os01g42950	0.518836	7.99e-05
AT1G25375	-2.40457	0.000107399		LOC_Os01g42960	1.68783	7.99e-05
AT1G25400	3.49447	0.000107399		LOC_Os01g42990	-2.33846	7.99e-05
AT1G25425	-2.90851	0.000107399		LOC_Os01g43040	-2.60882	7.99e-05
AT1G25440	-1.44208	0.000107399		LOC_Os01g43090	0.712916	7.99e-05
AT1G25450	-2.46864	0.000107399		LOC_Os01g43100	1.19576	7.99e-05
AT1G25460	#NAME?	0.000107399		LOC_Os01g43110	inf	7.99e-05
AT1G25510	-4.74484	0.000107399		LOC_Os01g43130	1.00311	7.99e-05
AT1G25540	1.6162	0.000107399		LOC_Os01g43150	1.00386	7.99e-05
AT1G25560	1.03146	0.000107399		LOC_Os01g43160	0.762848	7.99e-05
AT1G25570	-1.13299	0.000107399		LOC_Os01g43170	0.714221	7.99e-05
AT1G25580	-1.34038	0.000107399		LOC_Os01g43230	-2.96115	7.99e-05
AT1G25682	3.51146	0.000107399		LOC_Os01g43270	-4.74877	7.99e-05
AT1G26130	-1.98902	0.000107399		LOC_Os01g43320	-3.29231	7.99e-05
AT1G26140	inf	0.000107399		LOC_Os01g43330	-1.21149	7.99e-05
AT1G26150	-2.21542	0.000107399		LOC_Os01g43360	0.315319	7.99e-05
AT1G26170	-2.17319	0.000107399		LOC_Os01g43370	0.617132	7.99e-05
AT1G26190	-1.74918	0.000107399		LOC_Os01g43380	0.680777	7.99e-05
AT1G26210	-2.4429	0.000107399		LOC_Os01g43390	-0.864344	7.99e-05
AT1G26260	-3.35776	0.000107399		LOC_Os01g43410	1.61438	7.99e-05
AT1G26330	-3.66331	0.000107399		LOC_Os01g43420	0.963164	7.99e-05
AT1G26380	2.88203	0.000107399		LOC_Os01g43460	3.64586	7.99e-05
AT1G26390	2.07924	0.000107399		LOC_Os01g43480	2.22763	7.99e-05
AT1G26420	1.37148	0.000107399		LOC_Os01g43490	3.37443	7.99e-05
AT1G26450	1.36007	0.000107399		LOC_Os01g43520	-0.775288	7.99e-05
AT1G26460	-1.13405	0.000107399		LOC_Os01g43680	-0.542198	7.99e-05
AT1G26500	-3.45987	0.000107399		LOC_Os01g43710	0.836362	7.99e-05
AT1G26520	-2.32781	0.000107399		LOC_Os01g43740	0.967552	7.99e-05
AT1G26540	-3.10071	0.000107399		LOC_Os01g43750	-0.968949	7.99e-05
AT1G26560	-1.78277	0.000107399		LOC_Os01g43760	0.797641	7.99e-05
AT1G26570	-2.4216	0.000107399		LOC_Os01g43844	1.87243	7.99e-05
AT1G26580	1.93246	0.000107399		LOC_Os01g43851	-1.3321	7.99e-05
AT1G26630	1.36262	0.000107399		LOC_Os01g43870	2.57861	7.99e-05
AT1G26640	-2.60538	0.000107399		LOC_Os01g43890	1.17255	7.99e-05
AT1G26650	-1.33691	0.000107399		LOC_Os01g43910	2.05371	7.99e-05
AT1G26660	1.28478	0.000107399		LOC_Os01g43980	-1.8098	7.99e-05
AT1G26665	3.10442	0.000107399		LOC_Os01g44040	-0.757714	7.99e-05
AT1G26670	1.5046	0.000107399		LOC_Os01g44050	3.08669	7.99e-05
AT1G26690	2.207	0.000107399		LOC_Os01g44069	-2.44273	7.99e-05
AT1G26750	-1.68402	0.000107399		LOC_Os01g44110	-1.41606	7.99e-05
AT1G26761	-2.26081	0.000107399		LOC_Os01g44190	-0.841124	7.99e-05
AT1G26770	-1.44741	0.000107399		LOC_Os01g44220	-0.578278	7.99e-05
AT1G26800	5.80786	0.000107399		LOC_Os01g44230	-0.557403	7.99e-05
AT1G26810	-1.90226	0.000107399		LOC_Os01g44250	-1.75676	7.99e-05
AT1G26820	-4.42397	0.000107399		LOC_Os01g44310	-0.735518	7.99e-05
AT1G26830	1.12171	0.000107399		LOC_Os01g44390	-1.42953	7.99e-05
AT1G26840	-1.87629	0.000107399		LOC_Os01g44394	1.06202	7.99e-05
AT1G26910	-1.79123	0.000107399		LOC_Os01g44430	0.494365	7.99e-05
AT1G26920	1.08253	0.000107399		LOC_Os01g44960	1.67718	7.99e-05
AT1G26945	2.89756	0.000107399		LOC_Os01g45070	0.557863	7.99e-05
AT1G26960	-2.34633	0.000107399		LOC_Os01g45110	-0.653514	7.99e-05
AT1G27000	1.45626	0.000107399		LOC_Os01g45140	-3.89571	7.99e-05
AT1G27050	-1.12415	0.000107399		LOC_Os01g45250	2.61536	7.99e-05
AT1G27090	3.565	0.000107399		LOC_Os01g45360	-0.572024	7.99e-05
AT1G27100	1.26477	0.000107399		LOC_Os01g45370	-0.742154	7.99e-05
AT1G27120	-4.07422	0.000107399		LOC_Os01g45380	-1.12393	7.99e-05
AT1G27130	-1.07863	0.000107399		LOC_Os01g45390	-0.47871	7.99e-05
AT1G27150	1.18081	0.000107399		LOC_Os01g45400	inf	7.99e-05
AT1G27170	2.20731	0.000107399		LOC_Os01g45470	0.890813	7.99e-05
AT1G27180	-2.05087	0.000107399		LOC_Os01g45530	-0.860272	7.99e-05
AT1G27290	3.23073	0.000107399		LOC_Os01g45620	-0.815407	7.99e-05
AT1G27300	2.84185	0.000107399		LOC_Os01g45640	1.76197	7.99e-05
AT1G27310	2.45673	0.000107399		LOC_Os01g45750	0.882066	7.99e-05
AT1G27320	1.64299	0.000107399		LOC_Os01g45830	-2.14332	7.99e-05
AT1G27350	1.64993	0.000107399		LOC_Os01g45840	-0.771537	7.99e-05
AT1G27360	-4.42322	0.000107399		LOC_Os01g45860	-1.71475	7.99e-05
AT1G27385	1.46191	0.000107399		LOC_Os01g45880	-1.20335	7.99e-05
AT1G27400	1.3955	0.000107399		LOC_Os01g45900	-1.56919	7.99e-05
AT1G27410	2.56968	0.000107399		LOC_Os01g45914	-12.2805	7.99e-05
AT1G27420	2.65669	0.000107399		LOC_Os01g45960	-1.76066	7.99e-05
AT1G27435	1.15082	0.000107399		LOC_Os01g45990	-1.11186	7.99e-05
AT1G27440	-1.10853	0.000107399		LOC_Os01g46020	2.16653	7.99e-05
AT1G27460	-2.08863	0.000107399		LOC_Os01g46040	-1.68078	7.99e-05
AT1G27480	-1.81495	0.000107399		LOC_Os01g46080	1.81685	7.99e-05
AT1G27510	1.66847	0.000107399		LOC_Os01g46120	-1.66692	7.99e-05
AT1G27530	1.7231	0.000107399		LOC_Os01g46130	-2.19728	7.99e-05
AT1G27540	0.968062	0.000107399		LOC_Os01g46140	-1.44752	7.99e-05
AT1G27590	3.63895	0.000107399		LOC_Os01g46230	-2.95996	7.99e-05
AT1G27600	1.93379	0.000107399		LOC_Os01g46380	-1.53926	7.99e-05
AT1G27630	1.1443	0.000107399		LOC_Os01g46400	-0.677436	7.99e-05
AT1G27650	3.72888	0.000107399		LOC_Os01g46500	0.709532	7.99e-05
AT1G27660	-1.57133	0.000107399		LOC_Os01g46510	-0.276516	7.99e-05
AT1G27680	-2.91136	0.000107399		LOC_Os01g46580	1.01152	7.99e-05
AT1G27730	2.98024	0.000107399		LOC_Os01g46610	1.2969	7.99e-05
AT1G27750	1.02487	0.000107399		LOC_Os01g46700	0.853723	7.99e-05
AT1G27752	0.896591	0.000107399		LOC_Os01g46720	-2.53707	7.99e-05
AT1G27840	1.84026	0.000107399		LOC_Os01g46750	0.447392	7.99e-05
AT1G27850	-1.13099	0.000107399		LOC_Os01g46760	0.548029	7.99e-05
AT1G27880	-2.37979	0.000107399		LOC_Os01g46800	3.78153	7.99e-05
AT1G27950	-2.35051	0.000107399		LOC_Os01g46926	1.01927	7.99e-05
AT1G28010	-2.77937	0.000107399		LOC_Os01g46932	1.17371	7.99e-05
AT1G28050	1.58408	0.000107399		LOC_Os01g46970	-0.430786	7.99e-05
AT1G28060	2.15031	0.000107399		LOC_Os01g46980	1.36181	7.99e-05
AT1G28070	1.4113	0.000107399		LOC_Os01g47050	-1.39534	7.99e-05
AT1G28110	-1.75047	0.000107399		LOC_Os01g47070	0.837027	7.99e-05
AT1G28120	1.33293	0.000107399		LOC_Os01g47080	-1.42617	7.99e-05
AT1G28130	1.37534	0.000107399		LOC_Os01g47190	0.903105	7.99e-05
AT1G28150	1.51352	0.000107399		LOC_Os01g47200	-2.01402	7.99e-05
AT1G28190	3.05621	0.000107399		LOC_Os01g47256	-1.22782	7.99e-05
AT1G28200	2.71199	0.000107399		LOC_Os01g47262	0.392624	7.99e-05
AT1G28210	1.54079	0.000107399		LOC_Os01g47270	1.14657	7.99e-05
AT1G28260	3.65447	0.000107399		LOC_Os01g47330	-1.57902	7.99e-05
AT1G28290	-1.17979	0.000107399		LOC_Os01g47340	1.07103	7.99e-05
AT1G28320	1.37531	0.000107399		LOC_Os01g47350	-0.821666	7.99e-05
AT1G28330	3.76689	0.000107399		LOC_Os01g47370	3.96442	7.99e-05
AT1G28360	2.58151	0.000107399		LOC_Os01g47400	-1.97745	7.99e-05
AT1G28395	-2.34738	0.000107399		LOC_Os01g47410	-0.823442	7.99e-05
AT1G28400	-2.54152	0.000107399		LOC_Os01g47420	1.12184	7.99e-05
AT1G28450	#NAME?	0.000107399		LOC_Os01g47430	0.833913	7.99e-05
AT1G28510	-1.71878	0.000107399		LOC_Os01g47450	0.301629	7.99e-05
AT1G28520	0.958978	0.000107399		LOC_Os01g47460	0.966322	7.99e-05
AT1G28550	inf	0.000107399		LOC_Os01g47470	-0.726566	7.99e-05
AT1G28560	-1.63996	0.000107399		LOC_Os01g47490	-0.608998	7.99e-05
AT1G28570	-1.92229	0.000107399		LOC_Os01g47530	-0.770302	7.99e-05
AT1G28600	-2.13193	0.000107399		LOC_Os01g47540	2.02301	7.99e-05
AT1G28610	-1.96731	0.000107399		LOC_Os01g47550	-1.21831	7.99e-05
AT1G28620	-3.00405	0.000107399		LOC_Os01g47560	1.55749	7.99e-05
AT1G28670	-1.12412	0.000107399		LOC_Os01g47570	0.42071	7.99e-05
AT1G28710	-2.22076	0.000107399		LOC_Os01g47580	2.48156	7.99e-05
AT1G28760	1.48839	0.000107399		LOC_Os01g47620	1.00181	7.99e-05
AT1G28960	3.01927	0.000107399		LOC_Os01g47630	3.11361	7.99e-05
AT1G29030	2.61713	0.000107399		LOC_Os01g47650	0.29941	7.99e-05
AT1G29120	-0.980251	0.000107399		LOC_Os01g47660	-0.590865	7.99e-05
AT1G29150	2.00416	0.000107399		LOC_Os01g47670	inf	7.99e-05
AT1G29160	-2.78756	0.000107399		LOC_Os01g47690	0.370821	7.99e-05
AT1G29170	-3.11949	0.000107399		LOC_Os01g47730	3.5556	7.99e-05
AT1G29220	1.58205	0.000107399		LOC_Os01g47740	1.20329	7.99e-05
AT1G29250	-1.54797	0.000107399		LOC_Os01g47745	inf	7.99e-05
AT1G29260	3.26596	0.000107399		LOC_Os01g47760	3.94346	7.99e-05
AT1G29300	-1.90087	0.000107399		LOC_Os01g47770	0.983403	7.99e-05
AT1G29340	1.65449	0.000107399		LOC_Os01g47800	-1.47325	7.99e-05
AT1G29350	1.28323	0.000107399		LOC_Os01g47810	-2.08686	7.99e-05
AT1G29370	1.56301	0.000107399		LOC_Os01g47840	-1.60897	7.99e-05
AT1G29395	1.67163	0.000107399		LOC_Os01g47900	2.28631	7.99e-05
AT1G29400	1.28204	0.000107399		LOC_Os01g48020	-1.45775	7.99e-05
AT1G29418	2.08777	0.000107399		LOC_Os01g48060	-1.35832	7.99e-05
AT1G29465	4.10124	0.000107399		LOC_Os01g48180	-1.89025	7.99e-05
AT1G29520	-2.01153	0.000107399		LOC_Os01g48190	2.98976	7.99e-05
AT1G29530	-1.84603	0.000107399		LOC_Os01g48200	1.39233	7.99e-05
AT1G29560	-3.42883	0.000107399		LOC_Os01g48210	1.21603	7.99e-05
AT1G29590	-2.54084	0.000107399		LOC_Os01g48220	2.90989	7.99e-05
AT1G29630	-4.75111	0.000107399		LOC_Os01g48270	0.803192	7.99e-05
AT1G29660	-3.21966	0.000107399		LOC_Os01g48290	1.7828	7.99e-05
AT1G29670	-1.13512	0.000107399		LOC_Os01g48300	1.18315	7.99e-05
AT1G29690	1.20454	0.000107399		LOC_Os01g48320	0.456763	7.99e-05
AT1G29700	-1.00451	0.000107399		LOC_Os01g48360	1.32697	7.99e-05
AT1G29710	-2.59502	0.000107399		LOC_Os01g48370	2.30331	7.99e-05
AT1G29720	-5.18776	0.000107399		LOC_Os01g48380	-0.780448	7.99e-05
AT1G29750	-1.10408	0.000107399		LOC_Os01g48390	0.349474	7.99e-05
AT1G29760	2.65483	0.000107399		LOC_Os01g48410	inf	7.99e-05
AT1G29770	2.37513	0.000107399		LOC_Os01g48420	1.01873	7.99e-05
AT1G29820	-1.35809	0.000107399		LOC_Os01g48440	0.644851	7.99e-05
AT1G29840	-2.46488	0.000107399		LOC_Os01g48444	0.4107	7.99e-05
AT1G29850	1.1865	0.000107399		LOC_Os01g48446	3.44369	7.99e-05
AT1G29860	#NAME?	0.000107399		LOC_Os01g48610	-2.91194	7.99e-05
AT1G29890	-1.9192	0.000107399		LOC_Os01g48620	-3.04012	7.99e-05
AT1G29900	-1.31634	0.000107399		LOC_Os01g48640	-1.38566	7.99e-05
AT1G29910	1.94993	0.000107399		LOC_Os01g48650	2.44776	7.99e-05
AT1G29920	3.30626	0.000107399		LOC_Os01g48680	-0.682282	7.99e-05
AT1G29960	-2.78306	0.000107399		LOC_Os01g48720	-0.616079	7.99e-05
AT1G29970	2.89179	0.000107399		LOC_Os01g48760	0.725251	7.99e-05
AT1G29980	-3.858	0.000107399		LOC_Os01g48770	-0.551611	7.99e-05
AT1G30040	1.97537	0.000107399		LOC_Os01g48810	1.00137	7.99e-05
AT1G30070	4.78423	0.000107399		LOC_Os01g48820	-1.57967	7.99e-05
AT1G30090	1.77637	0.000107399		LOC_Os01g48850	0.839831	7.99e-05
AT1G30110	-3.48106	0.000107399		LOC_Os01g48874	0.49982	7.99e-05
AT1G30120	-1.95082	0.000107399		LOC_Os01g48920	-0.405709	7.99e-05
AT1G30130	1.2543	0.000107399		LOC_Os01g48930	0.871291	7.99e-05
AT1G30135	2.41307	0.000107399		LOC_Os01g48940	-2.57731	7.99e-05
AT1G30200	2.66535	0.000107399		LOC_Os01g48950	-3.26851	7.99e-05
AT1G30210	-2.08459	0.000107399		LOC_Os01g48980	-0.387575	7.99e-05
AT1G30220	2.07506	0.000107399		LOC_Os01g48990	0.665035	7.99e-05
AT1G30230	2.27916	0.000107399		LOC_Os01g49026	0.416938	7.99e-05
AT1G30250	-2.73829	0.000107399		LOC_Os01g49120	0.829952	7.99e-05
AT1G30260	-1.08096	0.000107399		LOC_Os01g49180	-0.903271	7.99e-05
AT1G30270	1.00471	0.000107399		LOC_Os01g49190	-0.282846	7.99e-05
AT1G30280	-3.12261	0.000107399		LOC_Os01g49200	2.98166	7.99e-05
AT1G30282	-2.89393	0.000107399		LOC_Os01g49210	-1.99402	7.99e-05
AT1G30290	-2.40298	0.000107399		LOC_Os01g49219	-2.31037	7.99e-05
AT1G30400	-1.7045	0.000107399		LOC_Os01g49230	-2.05524	7.99e-05
AT1G30410	-3.23886	0.000107399		LOC_Os01g49250	-0.799426	7.99e-05
AT1G30420	-4.24759	0.000107399		LOC_Os01g49290	-2.11443	7.99e-05
AT1G30440	-2.17307	0.000107399		LOC_Os01g49310	1.26918	7.99e-05
AT1G30450	-1.1634	0.000107399		LOC_Os01g49320	-1.39074	7.99e-05
AT1G30460	1.91783	0.000107399		LOC_Os01g49330	-0.753983	7.99e-05
AT1G30480	1.20636	0.000107399		LOC_Os01g49410	1.59124	7.99e-05
AT1G30490	1.83524	0.000107399		LOC_Os01g49470	-2.82442	7.99e-05
AT1G30500	4.00898	0.000107399		LOC_Os01g49510	-1.31043	7.99e-05
AT1G30510	-2.67451	0.000107399		LOC_Os01g49529	-0.316748	7.99e-05
AT1G30520	-1.56089	0.000107399		LOC_Os01g49680	0.57226	7.99e-05
AT1G30530	-1.70707	0.000107399		LOC_Os01g49690	0.906738	7.99e-05
AT1G30570	-1.30386	0.000107399		LOC_Os01g49730	-2.11316	7.99e-05
AT1G30600	-3.86438	0.000107399		LOC_Os01g49740	-1.98677	7.99e-05
AT1G30650	-3.45593	0.000107399		LOC_Os01g49760	-1.21056	7.99e-05
AT1G30690	-1.37338	0.000107399		LOC_Os01g49770	1.73592	7.99e-05
AT1G30700	2.65012	0.000107399		LOC_Os01g49820	1.62127	7.99e-05
AT1G30720	5.81696	0.000107399		LOC_Os01g49830	2.00694	7.99e-05
AT1G30730	4.96685	0.000107399		LOC_Os01g49890	-0.944514	7.99e-05
AT1G30810	0.947638	0.000107399		LOC_Os01g49900	0.349065	7.99e-05
AT1G30820	1.88884	0.000107399		LOC_Os01g49920	1.23533	7.99e-05
AT1G30825	-1.09377	0.000107399		LOC_Os01g50010	0.534302	7.99e-05
AT1G30845	-1.87443	0.000107399		LOC_Os01g50030	0.647418	7.99e-05
AT1G30880	1.42727	0.000107399		LOC_Os01g50040	1.98915	7.99e-05
AT1G30900	-2.28866	0.000107399		LOC_Os01g50050	2.24903	7.99e-05
AT1G30910	-1.17763	0.000107399		LOC_Os01g50080	0.784753	7.99e-05
AT1G30970	0.945675	0.000107399		LOC_Os01g50100	4.09213	7.99e-05
AT1G31010	-1.7314	0.000107399		LOC_Os01g50160	0.526126	7.99e-05
AT1G31020	-1.34273	0.000107399		LOC_Os01g50300	inf	7.99e-05
AT1G31040	2.27104	0.000107399		LOC_Os01g50310	1.93788	7.99e-05
AT1G31070	-1.82647	0.000107399		LOC_Os01g50370	6.49476	7.99e-05
AT1G31120	1.23866	0.000107399		LOC_Os01g50400	6.95142	7.99e-05
AT1G31150	-1.47386	0.000107399		LOC_Os01g50410	7.21028	7.99e-05
AT1G31160	-2.20601	0.000107399		LOC_Os01g50420	10.1961	7.99e-05
AT1G31180	-1.99008	0.000107399		LOC_Os01g50460	2.98915	7.99e-05
AT1G31190	-2.15317	0.000107399		LOC_Os01g50470	2.18182	7.99e-05
AT1G31230	-3.14588	0.000107399		LOC_Os01g50610	3.28634	7.99e-05
AT1G31240	1.88687	0.000107399		LOC_Os01g50690	-0.844402	7.99e-05
AT1G31280	1.07957	0.000107399		LOC_Os01g50730	-2.8442	7.99e-05
AT1G31300	-0.991914	0.000107399		LOC_Os01g50760	1.7632	7.99e-05
AT1G31335	1.44679	0.000107399		LOC_Os01g50770	0.842389	7.99e-05
AT1G31420	-1.49148	0.000107399		LOC_Os01g50830	-0.5442	7.99e-05
AT1G31500	-0.973768	0.000107399		LOC_Os01g50840	-0.916133	7.99e-05
AT1G31550	-2.53638	0.000107399		LOC_Os01g50849	-0.743377	7.99e-05
AT1G31690	-5.60002	0.000107399		LOC_Os01g50860	-0.3971	7.99e-05
AT1G31770	-2.10499	0.000107399		LOC_Os01g50910	1.75592	7.99e-05
AT1G31800	-1.78899	0.000107399		LOC_Os01g50930	-0.895158	7.99e-05
AT1G31814	1.12016	0.000107399		LOC_Os01g50940	3.63628	7.99e-05
AT1G31820	1.44088	0.000107399		LOC_Os01g50970	-2.96931	7.99e-05
AT1G31830	1.3057	0.000107399		LOC_Os01g51010	2.7936	7.99e-05
AT1G31920	-2.35346	0.000107399		LOC_Os01g51020	-0.839092	7.99e-05
AT1G31930	0.91761	0.000107399		LOC_Os01g51030	2.05593	7.99e-05
AT1G32050	1.79375	0.000107399		LOC_Os01g51060	-1.06612	7.99e-05
AT1G32080	-3.61673	0.000107399		LOC_Os01g51120	1.03853	7.99e-05
AT1G32090	3.11029	0.000107399		LOC_Os01g51154	0.575543	7.99e-05
AT1G32100	-1.36063	0.000107399		LOC_Os01g51170	-1.92244	7.99e-05
AT1G32120	1.38294	0.000107399		LOC_Os01g51200	0.389702	7.99e-05
AT1G32130	1.27014	0.000107399		LOC_Os01g51210	-0.907914	7.99e-05
AT1G32160	-1.96298	0.000107399		LOC_Os01g51220	1.00008	7.99e-05
AT1G32170	1.23443	0.000107399		LOC_Os01g51250	2.42431	7.99e-05
AT1G32210	0.934797	0.000107399		LOC_Os01g51280	1.2618	7.99e-05
AT1G32220	-1.00884	0.000107399		LOC_Os01g51290	0.635851	7.99e-05
AT1G32230	1.5988	0.000107399		LOC_Os01g51300	0.485117	7.99e-05
AT1G32260	1.57804	0.000107399		LOC_Os01g51320	-2.95507	7.99e-05
AT1G32310	1.01085	0.000107399		LOC_Os01g51330	-1.19742	7.99e-05
AT1G32330	1.36521	0.000107399		LOC_Os01g51360	0.847801	7.99e-05
AT1G32340	1.48613	0.000107399		LOC_Os01g51370	-2.39347	7.99e-05
AT1G32350	2.99659	0.000107399		LOC_Os01g51380	0.514993	7.99e-05
AT1G32360	2.05847	0.000107399		LOC_Os01g51390	0.603784	7.99e-05
AT1G32380	-1.28087	0.000107399		LOC_Os01g51410	2.09926	7.99e-05
AT1G32400	1.05736	0.000107399		LOC_Os01g51420	0.762208	7.99e-05
AT1G32415	-2.79005	0.000107399		LOC_Os01g51540	2.20334	7.99e-05
AT1G32440	-1.01758	0.000107399		LOC_Os01g51570	2.73984	7.99e-05
AT1G32470	-1.68846	0.000107399		LOC_Os01g51580	inf	7.99e-05
AT1G32530	1.43407	0.000107399		LOC_Os01g51630	-0.787615	7.99e-05
AT1G32550	-1.03159	0.000107399		LOC_Os01g51632	-2.21418	7.99e-05
AT1G32580	2.95524	0.000107399		LOC_Os01g51634	-2.06954	7.99e-05
AT1G32630	1.44472	0.000107399		LOC_Os01g51640	-1.69585	7.99e-05
AT1G32700	3.60439	0.000107399		LOC_Os01g51670	4.86794	7.99e-05
AT1G32730	-2.02819	0.000107399		LOC_Os01g51700	0.664564	7.99e-05
AT1G32760	2.58047	0.000107399		LOC_Os01g51710	0.510957	7.99e-05
AT1G32810	1.14589	0.000107399		LOC_Os01g51800	-0.825055	7.99e-05
AT1G32860	2.38748	0.000107399		LOC_Os01g51810	-1.59054	7.99e-05
AT1G32870	4.46543	0.000107399		LOC_Os01g51840	-1.06858	7.99e-05
AT1G32900	-1.90653	0.000107399		LOC_Os01g51870	1.3611	7.99e-05
AT1G32920	2.07747	0.000107399		LOC_Os01g51890	3.75095	7.99e-05
AT1G32928	2.48571	0.000107399		LOC_Os01g51920	3.61166	7.99e-05
AT1G32950	2.96553	0.000107399		LOC_Os01g52010	1.90235	7.99e-05
AT1G32990	-1.25083	0.000107399		LOC_Os01g52050	0.450878	7.99e-05
AT1G33050	3.50968	0.000107399		LOC_Os01g52090	-0.807936	7.99e-05
AT1G33110	-1.18244	0.000107399		LOC_Os01g52110	0.687101	7.99e-05
AT1G33170	-2.18435	0.000107399		LOC_Os01g52170	3.22743	7.99e-05
AT1G33230	1.93892	0.000107399		LOC_Os01g52190	inf	7.99e-05
AT1G33240	-1.32263	0.000107399		LOC_Os01g52200	inf	7.99e-05
AT1G33260	-4.74702	0.000107399		LOC_Os01g52214	0.92304	7.99e-05
AT1G33290	2.13842	0.000107399		LOC_Os01g52230	5.11415	7.99e-05
AT1G33330	-1.26348	0.000107399		LOC_Os01g52240	2.24923	7.99e-05
AT1G33360	0.894077	0.000107399		LOC_Os01g52250	2.1028	7.99e-05
AT1G33420	2.51172	0.000107399		LOC_Os01g52260	4.40994	7.99e-05
AT1G33440	-2.97798	0.000107399		LOC_Os01g52290	-1.50608	7.99e-05
AT1G33480	-1.80185	0.000107399		LOC_Os01g52304	0.761039	7.99e-05
AT1G33520	1.16611	0.000107399		LOC_Os01g52370	0.897829	7.99e-05
AT1G33612	2.86633	0.000107399		LOC_Os01g52400	-0.610825	7.99e-05
AT1G33615	3.38705	0.000107399		LOC_Os01g52460	0.837302	7.99e-05
AT1G33680	1.06783	0.000107399		LOC_Os01g52470	-1.66029	7.99e-05
AT1G33720	-1.48207	0.000107399		LOC_Os01g52490	-2.17114	7.99e-05
AT1G33770	1.51482	0.000107399		LOC_Os01g52530	2.36352	7.99e-05
AT1G33780	1.07706	0.000107399		LOC_Os01g52550	-1.5906	7.99e-05
AT1G33790	-1.54664	0.000107399		LOC_Os01g52560	-0.51854	7.99e-05
AT1G33800	-3.6497	0.000107399		LOC_Os01g52594	2.73793	7.99e-05
AT1G33811	-1.14803	0.000107399		LOC_Os01g52630	0.448577	7.99e-05
AT1G33813	inf	0.000107399		LOC_Os01g52640	1.04913	7.99e-05
AT1G33970	2.73001	0.000107399		LOC_Os01g52730	3.29013	7.99e-05
AT1G33980	0.945324	0.000107399		LOC_Os01g52750	-1.52588	7.99e-05
AT1G34010	-1.43646	0.000107399		LOC_Os01g52760	-1.61017	7.99e-05
AT1G34020	-1.11163	0.000107399		LOC_Os01g52810	0.625783	7.99e-05
AT1G34065	-2.23835	0.000107399		LOC_Os01g52864	-0.397049	7.99e-05
AT1G34110	-1.05525	0.000107399		LOC_Os01g52980	-0.9619	7.99e-05
AT1G34150	1.27907	0.000107399		LOC_Os01g53000	-0.593876	7.99e-05
AT1G34200	-1.79639	0.000107399		LOC_Os01g53020	2.04397	7.99e-05
AT1G34220	2.21103	0.000107399		LOC_Os01g53060	1.23585	7.99e-05
AT1G34270	-1.51498	0.000107399		LOC_Os01g53070	1.23436	7.99e-05
AT1G34300	2.0784	0.000107399		LOC_Os01g53079	1.23753	7.99e-05
AT1G34340	-1.09901	0.000107399		LOC_Os01g53090	1.35058	7.99e-05
AT1G34355	-2.35468	0.000107399		LOC_Os01g53140	0.536982	7.99e-05
AT1G34370	2.91994	0.000107399		LOC_Os01g53150	-0.773102	7.99e-05
AT1G34418	-2.44915	0.000107399		LOC_Os01g53220	2.34021	7.99e-05
AT1G34430	-2.00882	0.000107399		LOC_Os01g53240	-4.89559	7.99e-05
AT1G34630	1.58278	0.000107399		LOC_Os01g53350	1.16458	7.99e-05
AT1G34750	-1.1639	0.000107399		LOC_Os01g53370	-3.2027	7.99e-05
AT1G34760	2.53892	0.000107399		LOC_Os01g53390	-1.07438	7.99e-05
AT1G34780	2.22218	0.000107399		LOC_Os01g53420	-2.99523	7.99e-05
AT1G34844	2.01504	0.000107399		LOC_Os01g53450	-0.778646	7.99e-05
AT1G35050	inf	0.000107399		LOC_Os01g53500	-1.90538	7.99e-05
AT1G35190	1.60099	0.000107399		LOC_Os01g53520	-0.565059	7.99e-05
AT1G35210	-1.81775	0.000107399		LOC_Os01g53560	-0.738616	7.99e-05
AT1G35220	-1.53336	0.000107399		LOC_Os01g53600	0.654324	7.99e-05
AT1G35230	-2.4182	0.000107399		LOC_Os01g53610	-0.596083	7.99e-05
AT1G35260	-3.01114	0.000107399		LOC_Os01g53620	-1.73244	7.99e-05
AT1G35320	-2.54286	0.000107399		LOC_Os01g53670	-0.436861	7.99e-05
AT1G35350	-1.43975	0.000107399		LOC_Os01g53680	-0.696972	7.99e-05
AT1G35420	1.65333	0.000107399		LOC_Os01g53700	0.646694	7.99e-05
AT1G35460	1.28663	0.000107399		LOC_Os01g53710	3.29936	7.99e-05
AT1G35470	0.960861	0.000107399		LOC_Os01g53720	1.30052	7.99e-05
AT1G35516	0.938975	0.000107399		LOC_Os01g53730	4.27196	7.99e-05
AT1G35560	-3.00819	0.000107399		LOC_Os01g53790	3.95539	7.99e-05
AT1G35580	2.25145	0.000107399		LOC_Os01g53800	-1.15771	7.99e-05
AT1G35612	1.66708	0.000107399		LOC_Os01g53820	4.24903	7.99e-05
AT1G35660	3.83935	0.000107399		LOC_Os01g53880	4.07069	7.99e-05
AT1G35710	-2.9529	0.000107399		LOC_Os01g53890	-1.01426	7.99e-05
AT1G35720	-1.3363	0.000107399		LOC_Os01g53900	-1.54878	7.99e-05
AT1G35730	11.6011	0.000107399		LOC_Os01g53920	5.14274	7.99e-05
AT1G35735	inf	0.000107399		LOC_Os01g53930	1.37999	7.99e-05
AT1G35780	-1.09532	0.000107399		LOC_Os01g54010	-0.883923	7.99e-05
AT1G36060	3.64859	0.000107399		LOC_Os01g54020	-0.727106	7.99e-05
AT1G36070	2.63478	0.000107399		LOC_Os01g54050	1.82208	7.99e-05
AT1G36160	-2.30123	0.000107399		LOC_Os01g54080	-1.71184	7.99e-05
AT1G36180	-2.89374	0.000107399		LOC_Os01g54100	0.34672	7.99e-05
AT1G36280	-1.99532	0.000107399		LOC_Os01g54119	0.385077	7.99e-05
AT1G36310	-1.17847	0.000107399		LOC_Os01g54190	1.19423	7.99e-05
AT1G36370	-1.40976	0.000107399		LOC_Os01g54210	-3.6768	7.99e-05
AT1G36390	-1.8664	0.000107399		LOC_Os01g54300	-2.82461	7.99e-05
AT1G36400	inf	0.000107399		LOC_Os01g54340	1.59941	7.99e-05
AT1G36640	inf	0.000107399		LOC_Os01g54350	2.24138	7.99e-05
AT1G36732	3.03222	0.000107399		LOC_Os01g54390	1.48883	7.99e-05
AT1G36980	2.45943	0.000107399		LOC_Os01g54400	2.55571	7.99e-05
AT1G37130	-4.33414	0.000107399		LOC_Os01g54420	0.989863	7.99e-05
AT1G38131	-4.02886	0.000107399		LOC_Os01g54424	0.892442	7.99e-05
AT1G38194	inf	0.000107399		LOC_Os01g54440	-1.9357	7.99e-05
AT1G38203	inf	0.000107399		LOC_Os01g54480	1.75932	7.99e-05
AT1G38430	inf	0.000107399		LOC_Os01g54510	2.79437	7.99e-05
AT1G41830	1.08986	0.000107399		LOC_Os01g54530	0.614249	7.99e-05
AT1G41835	inf	0.000107399		LOC_Os01g54540	-0.664272	7.99e-05
AT1G41880	-1.02958	0.000107399		LOC_Os01g54550	2.36284	7.99e-05
AT1G42430	-2.04618	0.000107399		LOC_Os01g54560	1.80429	7.99e-05
AT1G42550	1.39096	0.000107399		LOC_Os01g54580	0.414901	7.99e-05
AT1G42970	-1.93244	0.000107399		LOC_Os01g54590	-1.32892	7.99e-05
AT1G42990	2.3195	0.000107399		LOC_Os01g54600	0.72533	7.99e-05
AT1G43130	3.25833	0.000107399		LOC_Os01g54670	2.29625	7.99e-05
AT1G43160	5.54424	0.000107399		LOC_Os01g54700	1.81265	7.99e-05
AT1G43245	1.91678	0.000107399		LOC_Os01g54784	-0.384118	7.99e-05
AT1G43560	-1.1124	0.000107399		LOC_Os01g54800	inf	7.99e-05
AT1G43590	2.93112	0.000107399		LOC_Os01g54850	2.02679	7.99e-05
AT1G43620	-1.33232	0.000107399		LOC_Os01g54860	0.995461	7.99e-05
AT1G43650	-2.09957	0.000107399		LOC_Os01g54870	-0.736993	7.99e-05
AT1G43700	3.80164	0.000107399		LOC_Os01g54900	0.792344	7.99e-05
AT1G43710	-1.79976	0.000107399		LOC_Os01g54910	0.573924	7.99e-05
AT1G43790	-1.73744	0.000107399		LOC_Os01g54920	0.720875	7.99e-05
AT1G43800	-6.56658	0.000107399		LOC_Os01g54930	0.995351	7.99e-05
AT1G43860	1.84197	0.000107399		LOC_Os01g54940	1.25709	7.99e-05
AT1G43886	3.03567	0.000107399		LOC_Os01g55030	-1.91567	7.99e-05
AT1G43890	2.72157	0.000107399		LOC_Os01g55040	-1.84594	7.99e-05
AT1G43910	-2.12318	0.000107399		LOC_Os01g55070	-2.16828	7.99e-05
AT1G44000	-3.01516	0.000107399		LOC_Os01g55090	-0.341199	7.99e-05
AT1G44100	-4.58761	0.000107399		LOC_Os01g55190	-2.52991	7.99e-05
AT1G44110	-5.6897	0.000107399		LOC_Os01g55240	4.51043	7.99e-05
AT1G44120	-2.36348	0.000107399		LOC_Os01g55290	-0.273794	7.99e-05
AT1G44350	1.27042	0.000107399		LOC_Os01g55300	0.654828	7.99e-05
AT1G44414	5.12799	0.000107399		LOC_Os01g55360	0.509678	7.99e-05
AT1G44760	-0.957031	0.000107399		LOC_Os01g55390	-2.3131	7.99e-05
AT1G44770	1.59691	0.000107399		LOC_Os01g55450	1.61619	7.99e-05
AT1G44835	-1.80498	0.000107399		LOC_Os01g55500	1.46868	7.99e-05
AT1G44900	-3.3402	0.000107399		LOC_Os01g55510	4.85691	7.99e-05
AT1G44970	-1.67789	0.000107399		LOC_Os01g55560	5.70063	7.99e-05
AT1G45010	-3.66101	0.000107399		LOC_Os01g55570	1.32183	7.99e-05
AT1G45050	2.29791	0.000107399		LOC_Os01g55580	0.510558	7.99e-05
AT1G45130	-1.64471	0.000107399		LOC_Os01g55610	-2.89184	7.99e-05
AT1G45145	1.86558	0.000107399		LOC_Os01g55660	1.74423	7.99e-05
AT1G45150	0.87584	0.000107399		LOC_Os01g55670	-0.481646	7.99e-05
AT1G45165	1.02607	0.000107399		LOC_Os01g55700	-0.676884	7.99e-05
AT1G45180	-1.78786	0.000107399		LOC_Os01g55730	0.56645	7.99e-05
AT1G45191	-4.08352	0.000107399		LOC_Os01g55770	0.40316	7.99e-05
AT1G45201	-3.79019	0.000107399		LOC_Os01g55830	0.34173	7.99e-05
AT1G45207	-2.40552	0.000107399		LOC_Os01g55860	1.53825	7.99e-05
AT1G45231	-1.39445	0.000107399		LOC_Os01g55870	-0.727595	7.99e-05
AT1G45249	-2.31315	0.000107399		LOC_Os01g55890	0.623846	7.99e-05
AT1G45474	-1.76641	0.000107399		LOC_Os01g55960	-1.65453	7.99e-05
AT1G45976	4.22475	0.000107399		LOC_Os01g56000	-0.330609	7.99e-05
AT1G46264	1.20308	0.000107399		LOC_Os01g56070	-0.838304	7.99e-05
AT1G46480	-4.73852	0.000107399		LOC_Os01g56100	0.617341	7.99e-05
AT1G46768	3.56901	0.000107399		LOC_Os01g56130	-0.422774	7.99e-05
AT1G47056	1.09609	0.000107399		LOC_Os01g56140	0.294161	7.99e-05
AT1G47128	2.58861	0.000107399		LOC_Os01g56150	-1.95851	7.99e-05
AT1G47200	-0.898881	0.000107399		LOC_Os01g56200	1.3136	7.99e-05
AT1G47210	-3.99296	0.000107399		LOC_Os01g56220	2.50393	7.99e-05
AT1G47278	2.85103	0.000107399		LOC_Os01g56230	0.547466	7.99e-05
AT1G47290	-1.47781	0.000107399		LOC_Os01g56240	2.88929	7.99e-05
AT1G47310	1.30357	0.000107399		LOC_Os01g56270	-0.461848	7.99e-05
AT1G47400	#NAME?	0.000107399		LOC_Os01g56290	-0.628599	7.99e-05
AT1G47480	-1.88666	0.000107399		LOC_Os01g56300	0.43405	7.99e-05
AT1G47485	#NAME?	0.000107399		LOC_Os01g56310	1.15818	7.99e-05
AT1G47510	3.49191	0.000107399		LOC_Os01g56320	-1.45313	7.99e-05
AT1G47520	-1.94758	0.000107399		LOC_Os01g56330	1.90664	7.99e-05
AT1G47565	-1.96714	0.000107399		LOC_Os01g56350	-0.854086	7.99e-05
AT1G47580	1.10786	0.000107399		LOC_Os01g56360	-1.90251	7.99e-05
AT1G47640	0.933942	0.000107399		LOC_Os01g56370	-1.56985	7.99e-05
AT1G47655	2.06906	0.000107399		LOC_Os01g56380	-3.66427	7.99e-05
AT1G47670	-1.85105	0.000107399		LOC_Os01g56390	2.62731	7.99e-05
AT1G47710	1.56497	0.000107399		LOC_Os01g56400	1.45084	7.99e-05
AT1G47740	-2.26008	0.000107399		LOC_Os01g56420	4.46664	7.99e-05
AT1G47840	-3.44012	0.000107399		LOC_Os01g56450	-6.7499	7.99e-05
AT1G47900	-2.7177	0.000107399		LOC_Os01g56460	-2.39013	7.99e-05
AT1G48090	-1.06923	0.000107399		LOC_Os01g56470	0.967841	7.99e-05
AT1G48200	1.17935	0.000107399		LOC_Os01g56480	-0.890037	7.99e-05
AT1G48230	-2.17725	0.000107399		LOC_Os01g56490	0.457338	7.99e-05
AT1G48260	4.15802	0.000107399		LOC_Os01g56510	-0.689195	7.99e-05
AT1G48270	-1.54469	0.000107399		LOC_Os01g56550	1.30484	7.99e-05
AT1G48360	-1.18853	0.000107399		LOC_Os01g56560	1.93648	7.99e-05
AT1G48370	-1.06797	0.000107399		LOC_Os01g56580	0.424873	7.99e-05
AT1G48380	1.9569	0.000107399		LOC_Os01g56590	-0.611191	7.99e-05
AT1G48450	2.78815	0.000107399		LOC_Os01g56620	-1.42017	7.99e-05
AT1G48460	1.29007	0.000107399		LOC_Os01g56680	1.40223	7.99e-05
AT1G48480	-3.89049	0.000107399		LOC_Os01g56780	-0.259125	7.99e-05
AT1G48520	-2.23311	0.000107399		LOC_Os01g56790	-0.621485	7.99e-05
AT1G48550	1.21034	0.000107399		LOC_Os01g56810	1.53245	7.99e-05
AT1G48570	1.75932	0.000107399		LOC_Os01g56850	1.53191	7.99e-05
AT1G48600	-1.19705	0.000107399		LOC_Os01g56880	0.929734	7.99e-05
AT1G48610	-2.05531	0.000107399		LOC_Os01g56890	0.670096	7.99e-05
AT1G48630	-2.58278	0.000107399		LOC_Os01g56900	-1.094	7.99e-05
AT1G48635	1.11556	0.000107399		LOC_Os01g56930	0.40912	7.99e-05
AT1G48650	-1.44786	0.000107399		LOC_Os01g56940	3.7761	7.99e-05
AT1G48710	inf	0.000107399		LOC_Os01g56980	-0.607409	7.99e-05
AT1G48720	inf	0.000107399		LOC_Os01g56990	0.655043	7.99e-05
AT1G48790	0.874957	0.000107399		LOC_Os01g57020	-2.27965	7.99e-05
AT1G48880	-3.54282	0.000107399		LOC_Os01g57066	0.329381	7.99e-05
AT1G48920	1.302	0.000107399		LOC_Os01g57073	0.412307	7.99e-05
AT1G48970	1.43106	0.000107399		LOC_Os01g57082	-1.77408	7.99e-05
AT1G49010	-1.7213	0.000107399		LOC_Os01g57100	1.41318	7.99e-05
AT1G49032	2.02577	0.000107399		LOC_Os01g57110	1.30432	7.99e-05
AT1G49040	-0.974408	0.000107399		LOC_Os01g57220	0.669796	7.99e-05
AT1G49130	4.31074	0.000107399		LOC_Os01g57230	1.93362	7.99e-05
AT1G49170	2.2478	0.000107399		LOC_Os01g57240	-0.776305	7.99e-05
AT1G49210	3.52026	0.000107399		LOC_Os01g57250	-1.94802	7.99e-05
AT1G49230	-2.28284	0.000107399		LOC_Os01g57260	0.39533	7.99e-05
AT1G49300	2.22136	0.000107399		LOC_Os01g57270	4.14416	7.99e-05
AT1G49320	1.16175	0.000107399		LOC_Os01g57280	-0.607186	7.99e-05
AT1G49340	-1.61023	0.000107399		LOC_Os01g57340	1.07365	7.99e-05
AT1G49380	-1.07705	0.000107399		LOC_Os01g57410	-1.72099	7.99e-05
AT1G49405	4.24873	0.000107399		LOC_Os01g57420	0.405833	7.99e-05
AT1G49410	-1.11253	0.000107399		LOC_Os01g57440	1.74205	7.99e-05
AT1G49430	-2.87296	0.000107399		LOC_Os01g57450	0.672566	7.99e-05
AT1G49470	-1.65592	0.000107399		LOC_Os01g57480	-0.636924	7.99e-05
AT1G49480	1.84053	0.000107399		LOC_Os01g57550	-0.41321	7.99e-05
AT1G49490	2.23487	0.000107399		LOC_Os01g57560	-0.321576	7.99e-05
AT1G49500	1.68646	0.000107399		LOC_Os01g57599	-1.73194	7.99e-05
AT1G49520	2.18676	0.000107399		LOC_Os01g57630	-1.42193	7.99e-05
AT1G49560	1.72031	0.000107399		LOC_Os01g57700	-1.8238	7.99e-05
AT1G49580	-3.61896	0.000107399		LOC_Os01g57710	-4.2821	7.99e-05
AT1G49590	1.54786	0.000107399		LOC_Os01g57730	1.76715	7.99e-05
AT1G49630	-3.91499	0.000107399		LOC_Os01g57740	1.23106	7.99e-05
AT1G49650	1.76356	0.000107399		LOC_Os01g57840	1.37922	7.99e-05
AT1G49670	-1.85565	0.000107399		LOC_Os01g57870	-2.37782	7.99e-05
AT1G49710	2.74432	0.000107399		LOC_Os01g57900	-3.08383	7.99e-05
AT1G49740	1.05707	0.000107399		LOC_Os01g57910	-0.555688	7.99e-05
AT1G49780	-1.11648	0.000107399		LOC_Os01g57930	-1.42026	7.99e-05
AT1G49790	3.88074	0.000107399		LOC_Os01g57945	inf	7.99e-05
AT1G49820	2.01941	0.000107399		LOC_Os01g57958	0.405809	7.99e-05
AT1G49840	3.07937	0.000107399		LOC_Os01g57960	2.39347	7.99e-05
AT1G49850	1.83605	0.000107399		LOC_Os01g58000	7.57352	7.99e-05
AT1G49870	-3.13129	0.000107399		LOC_Os01g58010	3.49086	7.99e-05
AT1G49880	1.10423	0.000107399		LOC_Os01g58020	8.36568	7.99e-05
AT1G49950	2.27994	0.000107399		LOC_Os01g58022	1.69257	7.99e-05
AT1G49975	-2.37647	0.000107399		LOC_Os01g58024	1.52197	7.99e-05
AT1G49990	-2.59219	0.000107399		LOC_Os01g58039	4.63977	7.99e-05
AT1G50055	1.24106	0.000107399		LOC_Os01g58048	2.37488	7.99e-05
AT1G50110	-1.83594	0.000107399		LOC_Os01g58049	3.99685	7.99e-05
AT1G50180	-1.78375	0.000107399		LOC_Os01g58080	-2.6103	7.99e-05
AT1G50240	-3.64728	0.000107399		LOC_Os01g58100	-1.23818	7.99e-05
AT1G50280	-2.42561	0.000107399		LOC_Os01g58130	7.0114	7.99e-05
AT1G50290	1.52199	0.000107399		LOC_Os01g58140	3.74486	7.99e-05
AT1G50300	2.18187	0.000107399		LOC_Os01g58150	3.47839	7.99e-05
AT1G50360	-2.20214	0.000107399		LOC_Os01g58194	-1.14478	7.99e-05
AT1G50370	1.77964	0.000107399		LOC_Os01g58220	1.29594	7.99e-05
AT1G50390	inf	0.000107399		LOC_Os01g58240	-3.31748	7.99e-05
AT1G50400	2.9434	0.000107399		LOC_Os01g58280	-3.36647	7.99e-05
AT1G50420	1.09322	0.000107399		LOC_Os01g58350	inf	7.99e-05
AT1G50460	1.60922	0.000107399		LOC_Os01g58380	0.487537	7.99e-05
AT1G50480	1.52648	0.000107399		LOC_Os01g58390	-0.671852	7.99e-05
AT1G50510	-0.960781	0.000107399		LOC_Os01g58400	0.912509	7.99e-05
AT1G50570	0.933824	0.000107399		LOC_Os01g58420	3.292	7.99e-05
AT1G50575	-2.83948	0.000107399		LOC_Os01g58430	inf	7.99e-05
AT1G50600	1.86967	0.000107399		LOC_Os01g58440	1.50733	7.99e-05
AT1G50640	3.0029	0.000107399		LOC_Os01g58444	-1.47994	7.99e-05
AT1G50710	-1.74331	0.000107399		LOC_Os01g58459	-1.47088	7.99e-05
AT1G50750	1.80481	0.000107399		LOC_Os01g58470	-0.768304	7.99e-05
AT1G50890	-1.48459	0.000107399		LOC_Os01g58520	-0.944695	7.99e-05
AT1G50920	1.84542	0.000107399		LOC_Os01g58530	0.680694	7.99e-05
AT1G50940	-1.31949	0.000107399		LOC_Os01g58550	3.57676	7.99e-05
AT1G51055	#NAME?	0.000107399		LOC_Os01g58580	-1.20665	7.99e-05
AT1G51060	-3.50707	0.000107399		LOC_Os01g58620	0.725419	7.99e-05
AT1G51070	-1.036	0.000107399		LOC_Os01g58630	-1.20376	7.99e-05
AT1G51100	-1.20013	0.000107399		LOC_Os01g58640	4.27952	7.99e-05
AT1G51110	-1.26065	0.000107399		LOC_Os01g58670	#NAME?	7.99e-05
AT1G51140	-1.69443	0.000107399		LOC_Os01g58690	-1.11906	7.99e-05
AT1G51160	0.995454	0.000107399		LOC_Os01g58700	1.34524	7.99e-05
AT1G51200	3.07822	0.000107399		LOC_Os01g58780	-1.00419	7.99e-05
AT1G51270	-1.06446	0.000107399		LOC_Os01g58790	-1.45777	7.99e-05
AT1G51310	1.58405	0.000107399		LOC_Os01g58870	-1.1347	7.99e-05
AT1G51355	-2.27448	0.000107399		LOC_Os01g58890	0.70979	7.99e-05
AT1G51360	2.03428	0.000107399		LOC_Os01g58910	-3.01063	7.99e-05
AT1G51370	1.47781	0.000107399		LOC_Os01g59060	-0.998756	7.99e-05
AT1G51380	2.80973	0.000107399		LOC_Os01g59080	1.05802	7.99e-05
AT1G51402	1.52601	0.000107399		LOC_Os01g59090	0.722483	7.99e-05
AT1G51440	-1.65967	0.000107399		LOC_Os01g59100	4.10899	7.99e-05
AT1G51460	-4.74728	0.000107399		LOC_Os01g59110	3.89308	7.99e-05
AT1G51510	1.09167	0.000107399		LOC_Os01g59130	-0.66745	7.99e-05
AT1G51550	2.81235	0.000107399		LOC_Os01g59140	1.8698	7.99e-05
AT1G51560	-1.77066	0.000107399		LOC_Os01g59170	inf	7.99e-05
AT1G51620	-2.55503	0.000107399		LOC_Os01g59180	1.20841	7.99e-05
AT1G51630	-1.40901	0.000107399		LOC_Os01g59190	-1.34836	7.99e-05
AT1G51650	1.51814	0.000107399		LOC_Os01g59340	-0.768426	7.99e-05
AT1G51660	-1.74093	0.000107399		LOC_Os01g59350	-1.35108	7.99e-05
AT1G51680	-2.86395	0.000107399		LOC_Os01g59440	0.801539	7.99e-05
AT1G51740	1.34949	0.000107399		LOC_Os01g59500	-0.453223	7.99e-05
AT1G51790	-3.24934	0.000107399		LOC_Os01g59530	1.10863	7.99e-05
AT1G51800	-3.45865	0.000107399		LOC_Os01g59600	0.653739	7.99e-05
AT1G51805	-3.28264	0.000107399		LOC_Os01g59610	1.08086	7.99e-05
AT1G51940	-1.03105	0.000107399		LOC_Os01g59620	-0.931581	7.99e-05
AT1G52000	-1.74993	0.000107399		LOC_Os01g59660	2.0411	7.99e-05
AT1G52030	-4.64295	0.000107399		LOC_Os01g59670	0.463979	7.99e-05
AT1G52040	-3.34442	0.000107399		LOC_Os01g59690	5.63825	7.99e-05
AT1G52155	-1.8566	0.000107399		LOC_Os01g59740	-1.76682	7.99e-05
AT1G52160	0.930255	0.000107399		LOC_Os01g59760	-1.10578	7.99e-05
AT1G52190	-1.41245	0.000107399		LOC_Os01g59790	1.63076	7.99e-05
AT1G52260	-1.13455	0.000107399		LOC_Os01g59800	1.26704	7.99e-05
AT1G52280	-1.84499	0.000107399		LOC_Os01g59819	-1.73721	7.99e-05
AT1G52290	-3.31495	0.000107399		LOC_Os01g59840	-2.23022	7.99e-05
AT1G52310	-1.36071	0.000107399		LOC_Os01g59880	1.26588	7.99e-05
AT1G52320	2.00012	0.000107399		LOC_Os01g59900	2.546	7.99e-05
AT1G52340	-0.979456	0.000107399		LOC_Os01g59910	0.937826	7.99e-05
AT1G52342	-1.17854	0.000107399		LOC_Os01g59920	-2.55856	7.99e-05
AT1G52360	-1.15201	0.000107399		LOC_Os01g59930	0.856382	7.99e-05
AT1G52400	-2.82481	0.000107399		LOC_Os01g59970	0.580636	7.99e-05
AT1G52410	-1.58456	0.000107399		LOC_Os01g59990	-0.792418	7.99e-05
AT1G52510	-1.71305	0.000107399		LOC_Os01g60020	6.21385	7.99e-05
AT1G52550	1.20721	0.000107399		LOC_Os01g60110	3.54981	7.99e-05
AT1G52565	1.95508	0.000107399		LOC_Os01g60170	-1.50322	7.99e-05
AT1G52618	-1.59624	0.000107399		LOC_Os01g60190	0.466646	7.99e-05
AT1G52620	-2.65524	0.000107399		LOC_Os01g60200	0.725316	7.99e-05
AT1G52700	-1.58676	0.000107399		LOC_Os01g60250	0.574956	7.99e-05
AT1G52740	1.59562	0.000107399		LOC_Os01g60260	-1.17667	7.99e-05
AT1G52770	-4.01808	0.000107399		LOC_Os01g60270	1.23655	7.99e-05
AT1G52780	-2.3885	0.000107399		LOC_Os01g60309	1.65534	7.99e-05
AT1G52820	2.10306	0.000107399		LOC_Os01g60360	inf	7.99e-05
AT1G52870	1.08374	0.000107399		LOC_Os01g60410	0.948693	7.99e-05
AT1G52890	3.49488	0.000107399		LOC_Os01g60420	2.29313	7.99e-05
AT1G52905	-2.19404	0.000107399		LOC_Os01g60440	1.26658	7.99e-05
AT1G53030	1.37786	0.000107399		LOC_Os01g60600	7.61083	7.99e-05
AT1G53035	-2.5033	0.000107399		LOC_Os01g60640	3.71703	7.99e-05
AT1G53040	-3.18578	0.000107399		LOC_Os01g60650	2.01746	7.99e-05
AT1G53050	-1.67893	0.000107399		LOC_Os01g60770	-3.73737	7.99e-05
AT1G53070	-4.03984	0.000107399		LOC_Os01g60790	-0.808125	7.99e-05
AT1G53090	-1.81798	0.000107399		LOC_Os01g60810	-3.55664	7.99e-05
AT1G53110	1.84525	0.000107399		LOC_Os01g60830	2.00044	7.99e-05
AT1G53140	-3.90257	0.000107399		LOC_Os01g60850	-3.65062	7.99e-05
AT1G53180	1.42666	0.000107399		LOC_Os01g60860	-1.78338	7.99e-05
AT1G53190	3.21885	0.000107399		LOC_Os01g60910	-0.560808	7.99e-05
AT1G53210	2.9776	0.000107399		LOC_Os01g60920	-1.69228	7.99e-05
AT1G53230	-5.26175	0.000107399		LOC_Os01g60930	-2.42161	7.99e-05
AT1G53233	-4.17646	0.000107399		LOC_Os01g61010	-2.67646	7.99e-05
AT1G53240	-1.85709	0.000107399		LOC_Os01g61030	1.02564	7.99e-05
AT1G53250	3.87499	0.000107399		LOC_Os01g61044	0.898033	7.99e-05
AT1G53290	-3.08341	0.000107399		LOC_Os01g61060	-1.06737	7.99e-05
AT1G53300	-2.75351	0.000107399		LOC_Os01g61070	1.07631	7.99e-05
AT1G53310	-2.39656	0.000107399		LOC_Os01g61080	9.09473	7.99e-05
AT1G53320	4.13396	0.000107399		LOC_Os01g61120	1.4214	7.99e-05
AT1G53345	-2.48245	0.000107399		LOC_Os01g61150	-1.0416	7.99e-05
AT1G53350	-1.91147	0.000107399		LOC_Os01g61170	-1.79647	7.99e-05
AT1G53390	-2.12103	0.000107399		LOC_Os01g61180	-0.718519	7.99e-05
AT1G53400	2.75672	0.000107399		LOC_Os01g61190	-2.09311	7.99e-05
AT1G53430	-1.62247	0.000107399		LOC_Os01g61230	3.50999	7.99e-05
AT1G53440	-2.3275	0.000107399		LOC_Os01g61320	-1.28898	7.99e-05
AT1G53460	2.29087	0.000107399		LOC_Os01g61330	-1.35382	7.99e-05
AT1G53500	-2.25841	0.000107399		LOC_Os01g61350	-2.66015	7.99e-05
AT1G53540	14.3244	0.000107399		LOC_Os01g61380	-2.54073	7.99e-05
AT1G53560	2.86017	0.000107399		LOC_Os01g61400	3.79648	7.99e-05
AT1G53570	1.3409	0.000107399		LOC_Os01g61410	2.51528	7.99e-05
AT1G53580	3.69575	0.000107399		LOC_Os01g61420	0.403334	7.99e-05
AT1G53590	1.51699	0.000107399		LOC_Os01g61430	0.814416	7.99e-05
AT1G53670	1.3683	0.000107399		LOC_Os01g61500	1.45489	7.99e-05
AT1G53690	#NAME?	0.000107399		LOC_Os01g61560	0.288548	7.99e-05
AT1G53700	-2.7078	0.000107399		LOC_Os01g61590	-0.616169	7.99e-05
AT1G53720	1.01386	0.000107399		LOC_Os01g61620	1.59184	7.99e-05
AT1G53730	2.80832	0.000107399		LOC_Os01g61630	-3.04345	7.99e-05
AT1G53830	1.88013	0.000107399		LOC_Os01g61670	1.23847	7.99e-05
AT1G53910	1.08036	0.000107399		LOC_Os01g61680	1.14519	7.99e-05
AT1G53920	-3.02919	0.000107399		LOC_Os01g61710	0.627052	7.99e-05
AT1G54000	-3.4636	0.000107399		LOC_Os01g61720	0.718402	7.99e-05
AT1G54010	-4.96111	0.000107399		LOC_Os01g61760	1.25049	7.99e-05
AT1G54020	-3.4826	0.000107399		LOC_Os01g61780	0.659031	7.99e-05
AT1G54050	7.09831	0.000107399		LOC_Os01g61810	0.721912	7.99e-05
AT1G54060	2.35484	0.000107399		LOC_Os01g61814	-1.48329	7.99e-05
AT1G54090	-1.1085	0.000107399		LOC_Os01g61860	0.947903	7.99e-05
AT1G54100	2.89958	0.000107399		LOC_Os01g61890	0.427803	7.99e-05
AT1G54115	-1.04653	0.000107399		LOC_Os01g61910	-0.690773	7.99e-05
AT1G54140	1.71767	0.000107399		LOC_Os01g61920	-0.612183	7.99e-05
AT1G54150	2.33885	0.000107399		LOC_Os01g61930	-0.309641	7.99e-05
AT1G54180	-1.50451	0.000107399		LOC_Os01g61970	-0.274416	7.99e-05
AT1G54200	-1.365	0.000107399		LOC_Os01g61990	2.70636	7.99e-05
AT1G54210	2.20809	0.000107399		LOC_Os01g62010	0.865905	7.99e-05
AT1G54220	-3.31345	0.000107399		LOC_Os01g62040	0.327249	7.99e-05
AT1G54250	1.29984	0.000107399		LOC_Os01g62060	-0.718595	7.99e-05
AT1G54290	1.89239	0.000107399		LOC_Os01g62070	1.97566	7.99e-05
AT1G54320	1.1226	0.000107399		LOC_Os01g62080	-0.810188	7.99e-05
AT1G54340	0.863747	0.000107399		LOC_Os01g62100	-0.958005	7.99e-05
AT1G54350	-1.61352	0.000107399		LOC_Os01g62190	4.17555	7.99e-05
AT1G54385	-4.07953	0.000107399		LOC_Os01g62200	-0.730646	7.99e-05
AT1G54410	-1.59632	0.000107399		LOC_Os01g62210	-0.873258	7.99e-05
AT1G54450	-3.23266	0.000107399		LOC_Os01g62230	-0.546812	7.99e-05
AT1G54570	-1.68789	0.000107399		LOC_Os01g62244	1.31267	7.99e-05
AT1G54610	-1.03886	0.000107399		LOC_Os01g62290	3.54999	7.99e-05
AT1G54650	-1.85305	0.000107399		LOC_Os01g62300	2.03131	7.99e-05
AT1G54690	-1.32202	0.000107399		LOC_Os01g62350	0.405406	7.99e-05
AT1G54710	1.33894	0.000107399		LOC_Os01g62370	-0.931327	7.99e-05
AT1G54730	-1.35757	0.000107399		LOC_Os01g62380	-2.18919	7.99e-05
AT1G54740	1.15467	0.000107399		LOC_Os01g62390	1.64191	7.99e-05
AT1G54820	-2.82024	0.000107399		LOC_Os01g62410	1.88382	7.99e-05
AT1G54830	1.07725	0.000107399		LOC_Os01g62430	7.5208	7.99e-05
AT1G54860	inf	0.000107399		LOC_Os01g62460	1.30895	7.99e-05
AT1G54960	-2.52417	0.000107399		LOC_Os01g62500	-1.28471	7.99e-05
AT1G54990	-1.76004	0.000107399		LOC_Os01g62620	-1.05086	7.99e-05
AT1G55000	2.45979	0.000107399		LOC_Os01g62630	-2.11491	7.99e-05
AT1G55090	-0.93665	0.000107399		LOC_Os01g62650	-1.39588	7.99e-05
AT1G55110	-1.19223	0.000107399		LOC_Os01g62670	2.71362	7.99e-05
AT1G55120	-3.38031	0.000107399		LOC_Os01g62760	-1.12788	7.99e-05
AT1G55130	-1.96789	0.000107399		LOC_Os01g62780	-0.586593	7.99e-05
AT1G55140	-1.90444	0.000107399		LOC_Os01g62810	4.47988	7.99e-05
AT1G55150	1.27429	0.000107399		LOC_Os01g62820	0.590039	7.99e-05
AT1G55152	2.12083	0.000107399		LOC_Os01g62840	-0.590134	7.99e-05
AT1G55210	-1.75912	0.000107399		LOC_Os01g62870	-1.18217	7.99e-05
AT1G55250	1.26345	0.000107399		LOC_Os01g62900	-1.11079	7.99e-05
AT1G55260	-3.17299	0.000107399		LOC_Os01g62910	-1.29523	7.99e-05
AT1G55280	2.10693	0.000107399		LOC_Os01g62920	1.16531	7.99e-05
AT1G55300	1.99874	0.000107399		LOC_Os01g62950	2.82264	7.99e-05
AT1G55310	3.90898	0.000107399		LOC_Os01g62970	-2.34391	7.99e-05
AT1G55330	-2.994	0.000107399		LOC_Os01g63050	1.3541	7.99e-05
AT1G55360	-1.90748	0.000107399		LOC_Os01g63060	2.91797	7.99e-05
AT1G55370	-1.1659	0.000107399		LOC_Os01g63190	-2.90385	7.99e-05
AT1G55450	-1.45082	0.000107399		LOC_Os01g63210	1.33889	7.99e-05
AT1G55475	-1.42589	0.000107399		LOC_Os01g63220	-1.00377	7.99e-05
AT1G55480	-1.99059	0.000107399		LOC_Os01g63250	-0.600103	7.99e-05
AT1G55500	-1.67615	0.000107399		LOC_Os01g63260	-1.80806	7.99e-05
AT1G55510	3.43679	0.000107399		LOC_Os01g63270	0.738091	7.99e-05
AT1G55520	1.58775	0.000107399		LOC_Os01g63280	-1.5778	7.99e-05
AT1G55530	6.14772	0.000107399		LOC_Os01g63290	-1.79662	7.99e-05
AT1G55550	-3.42363	0.000107399		LOC_Os01g63354	0.774598	7.99e-05
AT1G55590	2.20013	0.000107399		LOC_Os01g63410	1.4129	7.99e-05
AT1G55630	-1.48546	0.000107399		LOC_Os01g63420	-0.967281	7.99e-05
AT1G55690	-2.65221	0.000107399		LOC_Os01g63460	-0.545055	7.99e-05
AT1G55730	-1.04176	0.000107399		LOC_Os01g63470	-1.06548	7.99e-05
AT1G55760	-2.30025	0.000107399		LOC_Os01g63480	-2.14572	7.99e-05
AT1G55805	2.54503	0.000107399		LOC_Os01g63690	7.37106	7.99e-05
AT1G55810	3.97506	0.000107399		LOC_Os01g63710	-0.954624	7.99e-05
AT1G55820	3.38673	0.000107399		LOC_Os01g63770	-1.0285	7.99e-05
AT1G55840	-1.5381	0.000107399		LOC_Os01g63780	0.726984	7.99e-05
AT1G55870	1.72268	0.000107399		LOC_Os01g63800	0.707231	7.99e-05
AT1G55900	0.976528	0.000107399		LOC_Os01g63810	2.36455	7.99e-05
AT1G55910	-4.073	0.000107399		LOC_Os01g63820	1.069	7.99e-05
AT1G55920	1.88409	0.000107399		LOC_Os01g63830	-0.708105	7.99e-05
AT1G55960	3.58247	0.000107399		LOC_Os01g63854	-0.457136	7.99e-05
AT1G56020	-2.39869	0.000107399		LOC_Os01g63870	-1.32941	7.99e-05
AT1G56050	-2.24395	0.000107399		LOC_Os01g63880	2.67513	7.99e-05
AT1G56090	3.58263	0.000107399		LOC_Os01g63890	1.16028	7.99e-05
AT1G56120	-4.3664	0.000107399		LOC_Os01g63900	-1.07719	7.99e-05
AT1G56130	-3.25047	0.000107399		LOC_Os01g63930	1.3233	7.99e-05
AT1G56145	1.3229	0.000107399		LOC_Os01g63950	-1.28611	7.99e-05
AT1G56150	-1.19	0.000107399		LOC_Os01g64010	-1.14542	7.99e-05
AT1G56170	3.76507	0.000107399		LOC_Os01g64020	-2.36337	7.99e-05
AT1G56180	1.16717	0.000107399		LOC_Os01g64110	4.38167	7.99e-05
AT1G56190	-1.25107	0.000107399		LOC_Os01g64120	2.33274	7.99e-05
AT1G56200	3.41207	0.000107399		LOC_Os01g64170	4.02252	7.99e-05
AT1G56220	2.12609	0.000107399		LOC_Os01g64250	-1.02226	7.99e-05
AT1G56230	-1.96572	0.000107399		LOC_Os01g64256	2.96956	7.99e-05
AT1G56260	-1.74125	0.000107399		LOC_Os01g64280	0.268737	7.99e-05
AT1G56280	1.98191	0.000107399		LOC_Os01g64290	2.71367	7.99e-05
AT1G56290	1.35812	0.000107399		LOC_Os01g64300	0.796321	7.99e-05
AT1G56300	3.38506	0.000107399		LOC_Os01g64310	6.34818	7.99e-05
AT1G56345	-1.67534	0.000107399		LOC_Os01g64320	inf	7.99e-05
AT1G56410	inf	0.000107399		LOC_Os01g64330	0.962495	7.99e-05
AT1G56430	-5.79661	0.000107399		LOC_Os01g64350	-2.16503	7.99e-05
AT1G56440	4.17856	0.000107399		LOC_Os01g64360	4.96769	7.99e-05
AT1G56460	1.22968	0.000107399		LOC_Os01g64370	1.13084	7.99e-05
AT1G56500	-1.81833	0.000107399		LOC_Os01g64380	inf	7.99e-05
AT1G56510	-1.93316	0.000107399		LOC_Os01g64440	3.72295	7.99e-05
AT1G56520	-1.5391	0.000107399		LOC_Os01g64470	4.72027	7.99e-05
AT1G56550	-3.11216	0.000107399		LOC_Os01g64490	0.821498	7.99e-05
AT1G56560	-1.01401	0.000107399		LOC_Os01g64560	1.01883	7.99e-05
AT1G56580	-2.47332	0.000107399		LOC_Os01g64630	0.708494	7.99e-05
AT1G56600	1.63643	0.000107399		LOC_Os01g64640	1.31644	7.99e-05
AT1G56612	1.84359	0.000107399		LOC_Os01g64650	1.376	7.99e-05
AT1G56650	-3.95323	0.000107399		LOC_Os01g64660	0.398948	7.99e-05
AT1G56670	-1.88321	0.000107399		LOC_Os01g64670	0.943554	7.99e-05
AT1G56700	-0.883377	0.000107399		LOC_Os01g64680	1.68443	7.99e-05
AT1G56710	-2.71339	0.000107399		LOC_Os01g64690	0.643822	7.99e-05
AT1G56720	-2.37002	0.000107399		LOC_Os01g64700	-0.84954	7.99e-05
AT1G57540	1.99878	0.000107399		LOC_Os01g64730	0.818745	7.99e-05
AT1G57560	-2.87514	0.000107399		LOC_Os01g64750	1.11014	7.99e-05
AT1G57590	-3.75934	0.000107399		LOC_Os01g64760	-1.19322	7.99e-05
AT1G57600	-1.42011	0.000107399		LOC_Os01g64780	0.893243	7.99e-05
AT1G57610	-2.22413	0.000107399		LOC_Os01g64790	5.95691	7.99e-05
AT1G57620	-2.37486	0.000107399		LOC_Os01g64810	0.788707	7.99e-05
AT1G57630	-1.85819	0.000107399		LOC_Os01g64890	0.707904	7.99e-05
AT1G57810	inf	0.000107399		LOC_Os01g64900	0.987869	7.99e-05
AT1G57820	1.8315	0.000107399		LOC_Os01g64930	0.598146	7.99e-05
AT1G57870	-2.02214	0.000107399		LOC_Os01g64980	-0.446624	7.99e-05
AT1G57990	1.73727	0.000107399		LOC_Os01g65000	1.8023	7.99e-05
AT1G58030	2.27847	0.000107399		LOC_Os01g65010	-2.99025	7.99e-05
AT1G58080	-1.29432	0.000107399		LOC_Os01g65030	-4.02469	7.99e-05
AT1G58100	1.08913	0.000107399		LOC_Os01g65080	0.762248	7.99e-05
AT1G58130	9.224	0.000107399		LOC_Os01g65090	-0.742566	7.99e-05
AT1G58150	2.93061	0.000107399		LOC_Os01g65094	-1.94233	7.99e-05
AT1G58180	2.29301	0.000107399		LOC_Os01g65100	-4.83705	7.99e-05
AT1G58190	2.38147	0.000107399		LOC_Os01g65130	-4.59102	7.99e-05
AT1G58200	3.40348	0.000107399		LOC_Os01g65140	-1.24658	7.99e-05
AT1G58220	1.94307	0.000107399		LOC_Os01g65150	-2.54383	7.99e-05
AT1G58225	-3.64599	0.000107399		LOC_Os01g65169	-0.405667	7.99e-05
AT1G58250	-1.42248	0.000107399		LOC_Os01g65190	-1.81768	7.99e-05
AT1G58270	-4.4591	0.000107399		LOC_Os01g65200	0.465405	7.99e-05
AT1G58290	1.25387	0.000107399		LOC_Os01g65210	-1.37214	7.99e-05
AT1G58340	1.80884	0.000107399		LOC_Os01g65220	1.39566	7.99e-05
AT1G58350	-1.60965	0.000107399		LOC_Os01g65260	-0.64845	7.99e-05
AT1G58370	-3.50333	0.000107399		LOC_Os01g65330	0.832366	7.99e-05
AT1G58420	-1.69018	0.000107399		LOC_Os01g65350	-0.376557	7.99e-05
AT1G58440	-1.38175	0.000107399		LOC_Os01g65370	3.91644	7.99e-05
AT1G58470	2.2273	0.000107399		LOC_Os01g65380	-0.381391	7.99e-05
AT1G58520	-2.58763	0.000107399		LOC_Os01g65400	-1.84368	7.99e-05
AT1G58590	-3.47048	0.000107399		LOC_Os01g65410	1.15863	7.99e-05
AT1G58602	-4.84919	0.000107399		LOC_Os01g65420	-1.89644	7.99e-05
AT1G58807	1.32105	0.000107399		LOC_Os01g65460	-1.42867	7.99e-05
AT1G58848	1.7382	0.000107399		LOC_Os01g65480	-1.17723	7.99e-05
AT1G59540	-3.89083	0.000107399		LOC_Os01g65510	1.82051	7.99e-05
AT1G59590	1.70248	0.000107399		LOC_Os01g65520	3.54449	7.99e-05
AT1G59660	1.17579	0.000107399		LOC_Os01g65550	-1.95463	7.99e-05
AT1G59710	-1.46052	0.000107399		LOC_Os01g65560	-1.18154	7.99e-05
AT1G59730	#NAME?	0.000107399		LOC_Os01g65580	-0.510783	7.99e-05
AT1G59740	-2.90469	0.000107399		LOC_Os01g65600	-1.46261	7.99e-05
AT1G59860	10.4336	0.000107399		LOC_Os01g65630	-0.81979	7.99e-05
AT1G59870	-1.65083	0.000107399		LOC_Os01g65650	-0.339887	7.99e-05
AT1G59890	1.05186	0.000107399		LOC_Os01g65680	-0.726979	7.99e-05
AT1G59900	1.66775	0.000107399		LOC_Os01g65690	0.385637	7.99e-05
AT1G59960	-1.43741	0.000107399		LOC_Os01g65692	-0.389969	7.99e-05
AT1G59970	-2.56999	0.000107399		LOC_Os01g65720	-1.08074	7.99e-05
AT1G59980	3.99447	0.000107399		LOC_Os01g65780	1.24458	7.99e-05
AT1G59990	-1.08974	0.000107399		LOC_Os01g65800	0.736347	7.99e-05
AT1G60010	1.20516	0.000107399		LOC_Os01g65880	-1.12638	7.99e-05
AT1G60060	-1.60716	0.000107399		LOC_Os01g65890	0.650093	7.99e-05
AT1G60070	-2.46708	0.000107399		LOC_Os01g65900	0.478879	7.99e-05
AT1G60080	1.01121	0.000107399		LOC_Os01g65902	6.01585	7.99e-05
AT1G60140	2.52478	0.000107399		LOC_Os01g65904	-1.30648	7.99e-05
AT1G60160	1.02034	0.000107399		LOC_Os01g65986	1.48351	7.99e-05
AT1G60170	1.50459	0.000107399		LOC_Os01g66000	1.47896	7.99e-05
AT1G60190	2.47835	0.000107399		LOC_Os01g66010	1.6881	7.99e-05
AT1G60200	1.19613	0.000107399		LOC_Os01g66050	0.659747	7.99e-05
AT1G60270	-3.91352	0.000107399		LOC_Os01g66100	-3.62064	7.99e-05
AT1G60390	-4.02747	0.000107399		LOC_Os01g66110	0.701914	7.99e-05
AT1G60420	2.38102	0.000107399		LOC_Os01g66120	3.241	7.99e-05
AT1G60490	-1.05779	0.000107399		LOC_Os01g66130	2.5053	7.99e-05
AT1G60550	1.82873	0.000107399		LOC_Os01g66150	1.86564	7.99e-05
AT1G60560	-2.54171	0.000107399		LOC_Os01g66170	0.457805	7.99e-05
AT1G60590	-6.09408	0.000107399		LOC_Os01g66190	0.801729	7.99e-05
AT1G60600	-1.75945	0.000107399		LOC_Os01g66200	-1.72722	7.99e-05
AT1G60630	-1.21048	0.000107399		LOC_Os01g66240	1.4537	7.99e-05
AT1G60640	1.61272	0.000107399		LOC_Os01g66280	0.805297	7.99e-05
AT1G60650	2.18048	0.000107399		LOC_Os01g66300	0.810824	7.99e-05
AT1G60660	-2.24416	0.000107399		LOC_Os01g66310	-1.90626	7.99e-05
AT1G60670	1.74554	0.000107399		LOC_Os01g66320	1.04392	7.99e-05
AT1G60730	1.35096	0.000107399		LOC_Os01g66330	0.399999	7.99e-05
AT1G60780	-1.51769	0.000107399		LOC_Os01g66350	3.12716	7.99e-05
AT1G60790	1.9314	0.000107399		LOC_Os01g66360	0.755866	7.99e-05
AT1G60810	-1.7714	0.000107399		LOC_Os01g66379	0.602176	7.99e-05
AT1G60860	-1.276	0.000107399		LOC_Os01g66420	0.729623	7.99e-05
AT1G60870	1.2614	0.000107399		LOC_Os01g66490	0.608455	7.99e-05
AT1G60890	-3.63408	0.000107399		LOC_Os01g66500	-1.19929	7.99e-05
AT1G60900	1.00647	0.000107399		LOC_Os01g66530	3.59796	7.99e-05
AT1G60930	-2.47662	0.000107399		LOC_Os01g66560	-0.397531	7.99e-05
AT1G60940	1.15954	0.000107399		LOC_Os01g66610	-2.93357	7.99e-05
AT1G60950	-1.35265	0.000107399		LOC_Os01g66680	-1.22249	7.99e-05
AT1G60960	2.01479	0.000107399		LOC_Os01g66720	-2.26096	7.99e-05
AT1G60990	1.12593	0.000107399		LOC_Os01g66760	4.12123	7.99e-05
AT1G61040	2.19951	0.000107399		LOC_Os01g66820	-2.08143	7.99e-05
AT1G61065	2.7422	0.000107399		LOC_Os01g66830	-1.34128	7.99e-05
AT1G61120	-1.42394	0.000107399		LOC_Os01g66850	1.0123	7.99e-05
AT1G61150	1.19835	0.000107399		LOC_Os01g66860	4.35595	7.99e-05
AT1G61170	-2.39878	0.000107399		LOC_Os01g66890	2.07244	7.99e-05
AT1G61190	-3.00199	0.000107399		LOC_Os01g66920	-2.74934	7.99e-05
AT1G61240	-1.53981	0.000107399		LOC_Os01g66940	-0.400081	7.99e-05
AT1G61250	1.16838	0.000107399		LOC_Os01g66960	-0.476156	7.99e-05
AT1G61255	#NAME?	0.000107399		LOC_Os01g66970	-0.821606	7.99e-05
AT1G61260	-1.5954	0.000107399		LOC_Os01g67000	0.467779	7.99e-05
AT1G61280	#NAME?	0.000107399		LOC_Os01g67054	1.02923	7.99e-05
AT1G61300	-2.04973	0.000107399		LOC_Os01g67070	inf	7.99e-05
AT1G61310	-1.4147	0.000107399		LOC_Os01g67090	-2.76776	7.99e-05
AT1G61340	2.07825	0.000107399		LOC_Os01g67120	1.53998	7.99e-05
AT1G61350	-1.37749	0.000107399		LOC_Os01g67134	-0.411524	7.99e-05
AT1G61360	-2.94643	0.000107399		LOC_Os01g67160	0.776434	7.99e-05
AT1G61370	-2.61938	0.000107399		LOC_Os01g67170	-1.03904	7.99e-05
AT1G61380	-2.67434	0.000107399		LOC_Os01g67180	0.498455	7.99e-05
AT1G61420	-1.49858	0.000107399		LOC_Os01g67210	-1.82997	7.99e-05
AT1G61470	2.35585	0.000107399		LOC_Os01g67220	0.454236	7.99e-05
AT1G61490	-3.73649	0.000107399		LOC_Os01g67240	-1.15046	7.99e-05
AT1G61520	2.64901	0.000107399		LOC_Os01g67250	0.93962	7.99e-05
AT1G61580	1.24357	0.000107399		LOC_Os01g67290	-0.585339	7.99e-05
AT1G61600	-2.91625	0.000107399		LOC_Os01g67360	-2.93544	7.99e-05
AT1G61620	3.64662	0.000107399		LOC_Os01g67370	-1.19481	7.99e-05
AT1G61640	1.51414	0.000107399		LOC_Os01g67480	3.33729	7.99e-05
AT1G61667	-1.10267	0.000107399		LOC_Os01g67490	1.43878	7.99e-05
AT1G61670	-1.11573	0.000107399		LOC_Os01g67500	-1.4609	7.99e-05
AT1G61690	1.06449	0.000107399		LOC_Os01g67510	-0.503886	7.99e-05
AT1G61750	inf	0.000107399		LOC_Os01g67520	-3.6899	7.99e-05
AT1G61780	2.44068	0.000107399		LOC_Os01g67530	-0.561994	7.99e-05
AT1G61790	1.03528	0.000107399		LOC_Os01g67540	-1.59631	7.99e-05
AT1G61820	1.9288	0.000107399		LOC_Os01g67570	-1.84404	7.99e-05
AT1G61860	2.78454	0.000107399		LOC_Os01g67580	-1.48344	7.99e-05
AT1G61960	-1.5527	0.000107399		LOC_Os01g67590	-0.617793	7.99e-05
AT1G61980	-2.08787	0.000107399		LOC_Os01g67600	2.10719	7.99e-05
AT1G62040	2.65293	0.000107399		LOC_Os01g67700	inf	7.99e-05
AT1G62050	-1.95122	0.000107399		LOC_Os01g67720	1.35917	7.99e-05
AT1G62075	inf	0.000107399		LOC_Os01g67730	1.44348	7.99e-05
AT1G62085	-2.99556	0.000107399		LOC_Os01g67770	-0.579217	7.99e-05
AT1G62110	-3.01296	0.000107399		LOC_Os01g67810	6.83696	7.99e-05
AT1G62120	-1.94843	0.000107399		LOC_Os01g67820	6.92731	7.99e-05
AT1G62180	-4.004	0.000107399		LOC_Os01g67850	-0.948067	7.99e-05
AT1G62200	-1.50032	0.000107399		LOC_Os01g67880	0.858818	7.99e-05
AT1G62250	-1.92182	0.000107399		LOC_Os01g67920	0.833428	7.99e-05
AT1G62260	-2.20539	0.000107399		LOC_Os01g67970	0.670694	7.99e-05
AT1G62290	1.35537	0.000107399		LOC_Os01g68010	0.662465	7.99e-05
AT1G62305	1.45303	0.000107399		LOC_Os01g68020	3.47944	7.99e-05
AT1G62310	2.54793	0.000107399		LOC_Os01g68030	-0.64512	7.99e-05
AT1G62330	-2.66046	0.000107399		LOC_Os01g68040	0.605109	7.99e-05
AT1G62360	-1.17607	0.000107399		LOC_Os01g68060	3.21634	7.99e-05
AT1G62390	2.20014	0.000107399		LOC_Os01g68070	-0.998876	7.99e-05
AT1G62420	3.38052	0.000107399		LOC_Os01g68120	-0.393392	7.99e-05
AT1G62440	2.17241	0.000107399		LOC_Os01g68140	1.70615	7.99e-05
AT1G62500	-2.27401	0.000107399		LOC_Os01g68160	1.25016	7.99e-05
AT1G62510	6.72766	0.000107399		LOC_Os01g68230	-2.06756	7.99e-05
AT1G62520	-1.86897	0.000107399		LOC_Os01g68300	1.9126	7.99e-05
AT1G62540	-3.89081	0.000107399		LOC_Os01g68310	3.32133	7.99e-05
AT1G62560	-5.01872	0.000107399		LOC_Os01g68320	1.15481	7.99e-05
AT1G62590	-2.15132	0.000107399		LOC_Os01g68324	-0.676058	7.99e-05
AT1G62630	-3.53883	0.000107399		LOC_Os01g68330	1.1064	7.99e-05
AT1G62640	-2.80292	0.000107399		LOC_Os01g68380	0.866459	7.99e-05
AT1G62670	-3.4369	0.000107399		LOC_Os01g68390	0.659801	7.99e-05
AT1G62680	-2.02972	0.000107399		LOC_Os01g68440	1.14047	7.99e-05
AT1G62710	-1.75473	0.000107399		LOC_Os01g68450	0.250942	7.99e-05
AT1G62730	2.93044	0.000107399		LOC_Os01g68480	1.73935	7.99e-05
AT1G62760	4.75199	0.000107399		LOC_Os01g68490	1.61121	7.99e-05
AT1G62770	3.14581	0.000107399		LOC_Os01g68500	-1.72064	7.99e-05
AT1G62780	-2.32956	0.000107399		LOC_Os01g68510	1.37862	7.99e-05
AT1G62790	-1.28478	0.000107399		LOC_Os01g68545	-0.733215	7.99e-05
AT1G62810	-1.5421	0.000107399		LOC_Os01g68570	#NAME?	7.99e-05
AT1G62820	-1.71558	0.000107399		LOC_Os01g68630	-0.327683	7.99e-05
AT1G62860	-3.42353	0.000107399		LOC_Os01g68650	0.935697	7.99e-05
AT1G62870	-5.24272	0.000107399		LOC_Os01g68680	-0.818115	7.99e-05
AT1G62910	-2.16959	0.000107399		LOC_Os01g68700	-0.793573	7.99e-05
AT1G62930	-1.2529	0.000107399		LOC_Os01g68710	-0.370176	7.99e-05
AT1G62935	#NAME?	0.000107399		LOC_Os01g68720	-1.67957	7.99e-05
AT1G62990	-1.43005	0.000107399		LOC_Os01g68740	-2.58944	7.99e-05
AT1G63000	-1.73986	0.000107399		LOC_Os01g68760	0.701889	7.99e-05
AT1G63010	-1.1854	0.000107399		LOC_Os01g68770	0.478434	7.99e-05
AT1G63020	-1.63562	0.000107399		LOC_Os01g68800	-0.450677	7.99e-05
AT1G63050	-1.36103	0.000107399		LOC_Os01g68840	-2.41469	7.99e-05
AT1G63100	-4.87366	0.000107399		LOC_Os01g68860	0.445362	7.99e-05
AT1G63120	0.949596	0.000107399		LOC_Os01g68870	-1.18878	7.99e-05
AT1G63130	-1.28622	0.000107399		LOC_Os01g68890	-1.09139	7.99e-05
AT1G63180	3.50478	0.000107399		LOC_Os01g68930	-1.64024	7.99e-05
AT1G63220	-2.00428	0.000107399		LOC_Os01g68950	0.398541	7.99e-05
AT1G63250	1.71541	0.000107399		LOC_Os01g68960	3.23737	7.99e-05
AT1G63260	-3.08315	0.000107399		LOC_Os01g68970	0.868426	7.99e-05
AT1G63270	2.11184	0.000107399		LOC_Os01g69030	3.06401	7.99e-05
AT1G63300	-3.62237	0.000107399		LOC_Os01g69040	2.18207	7.99e-05
AT1G63360	-1.2058	0.000107399		LOC_Os01g69050	1.05116	7.99e-05
AT1G63420	-2.6023	0.000107399		LOC_Os01g69080	-0.226887	7.99e-05
AT1G63470	-3.00669	0.000107399		LOC_Os01g69090	-2.27745	7.99e-05
AT1G63500	1.13262	0.000107399		LOC_Os01g69100	-0.270889	7.99e-05
AT1G63530	4.50851	0.000107399		LOC_Os01g69110	-0.503666	7.99e-05
AT1G63610	-1.42544	0.000107399		LOC_Os01g69130	0.485699	7.99e-05
AT1G63630	#NAME?	0.000107399		LOC_Os01g69200	-2.3027	7.99e-05
AT1G63640	-3.26243	0.000107399		LOC_Os01g69210	0.401415	7.99e-05
AT1G63650	-4.12274	0.000107399		LOC_Os01g69230	1.11266	7.99e-05
AT1G63670	-2.23542	0.000107399		LOC_Os01g69250	0.56816	7.99e-05
AT1G63720	1.25735	0.000107399		LOC_Os01g69279	-0.950943	7.99e-05
AT1G63780	2.85049	0.000107399		LOC_Os01g69830	0.540511	7.99e-05
AT1G63800	1.66192	0.000107399		LOC_Os01g69840	-2.72368	7.99e-05
AT1G63830	2.14538	0.000107399		LOC_Os01g69850	0.880606	7.99e-05
AT1G63850	-1.79948	0.000107399		LOC_Os01g69870	-1.64299	7.99e-05
AT1G63930	4.23637	0.000107399		LOC_Os01g69900	0.825348	7.99e-05
AT1G63940	-3.9347	0.000107399		LOC_Os01g69904	-2.35125	7.99e-05
AT1G64040	2.31087	0.000107399		LOC_Os01g69910	-1.93159	7.99e-05
AT1G64060	-1.28006	0.000107399		LOC_Os01g69920	0.693119	7.99e-05
AT1G64065	1.45403	0.000107399		LOC_Os01g69940	0.856222	7.99e-05
AT1G64080	-3.54417	0.000107399		LOC_Os01g69960	-2.79921	7.99e-05
AT1G64105	1.05152	0.000107399		LOC_Os01g69970	-0.375922	7.99e-05
AT1G64142	1.11468	0.000107399		LOC_Os01g69980	1.1436	7.99e-05
AT1G64150	-2.74257	0.000107399		LOC_Os01g69990	-0.379211	7.99e-05
AT1G64170	-2.47667	0.000107399		LOC_Os01g70020	0.573334	7.99e-05
AT1G64190	1.2716	0.000107399		LOC_Os01g70080	3.32173	7.99e-05
AT1G64200	4.59754	0.000107399		LOC_Os01g70110	-1.02762	7.99e-05
AT1G64210	5.44982	0.000107399		LOC_Os01g70130	1.331	7.99e-05
AT1G64220	3.70812	0.000107399		LOC_Os01g70140	1.37587	7.99e-05
AT1G64230	2.86639	0.000107399		LOC_Os01g70180	1.85841	7.99e-05
AT1G64300	1.21406	0.000107399		LOC_Os01g70190	-1.32838	7.99e-05
AT1G64330	-1.67047	0.000107399		LOC_Os01g70200	-0.873129	7.99e-05
AT1G64355	1.13744	0.000107399		LOC_Os01g70210	1.61241	7.99e-05
AT1G64360	2.77453	0.000107399		LOC_Os01g70240	-0.837452	7.99e-05
AT1G64370	1.24491	0.000107399		LOC_Os01g70250	-1.68493	7.99e-05
AT1G64380	-2.05414	0.000107399		LOC_Os01g70260	-3.51096	7.99e-05
AT1G64385	-1.38419	0.000107399		LOC_Os01g70270	1.23243	7.99e-05
AT1G64390	-3.56996	0.000107399		LOC_Os01g70280	inf	7.99e-05
AT1G64400	-3.07049	0.000107399		LOC_Os01g70320	0.708642	7.99e-05
AT1G64440	1.29548	0.000107399		LOC_Os01g70330	0.501358	7.99e-05
AT1G64450	-3.88226	0.000107399		LOC_Os01g70380	-1.20138	7.99e-05
AT1G64460	1.51189	0.000107399		LOC_Os01g70410	0.514932	7.99e-05
AT1G64470	1.39956	0.000107399		LOC_Os01g70460	-2.10118	7.99e-05
AT1G64500	-1.74304	0.000107399		LOC_Os01g70470	2.83767	7.99e-05
AT1G64520	1.45675	0.000107399		LOC_Os01g70570	-1.56044	7.99e-05
AT1G64560	5.10228	0.000107399		LOC_Os01g70680	inf	7.99e-05
AT1G64561	5.49217	0.000107399		LOC_Os01g70710	1.07945	7.99e-05
AT1G64563	6.254	0.000107399		LOC_Os01g70720	-1.74839	7.99e-05
AT1G64580	-3.79771	0.000107399		LOC_Os01g70730	-1.37246	7.99e-05
AT1G64583	-2.44499	0.000107399		LOC_Os01g70740	0.638301	7.99e-05
AT1G64630	2.00323	0.000107399		LOC_Os01g70770	0.963931	7.99e-05
AT1G64650	-2.84946	0.000107399		LOC_Os01g70790	3.72743	7.99e-05
AT1G64660	4.83051	0.000107399		LOC_Os01g70800	1.54903	7.99e-05
AT1G64670	-2.00402	0.000107399		LOC_Os01g70810	0.268595	7.99e-05
AT1G64710	-1.20059	0.000107399		LOC_Os01g70820	4.44264	7.99e-05
AT1G64770	-2.17765	0.000107399		LOC_Os01g70920	-0.639371	7.99e-05
AT1G64790	-1.39955	0.000107399		LOC_Os01g70930	-1.0985	7.99e-05
AT1G64840	1.56142	0.000107399		LOC_Os01g70940	-2.21455	7.99e-05
AT1G64950	1.09299	0.000107399		LOC_Os01g70950	0.353956	7.99e-05
AT1G64980	-1.80782	0.000107399		LOC_Os01g70960	0.600359	7.99e-05
AT1G65010	-4.23454	0.000107399		LOC_Os01g70980	0.735343	7.99e-05
AT1G65020	1.93421	0.000107399		LOC_Os01g71090	-1.20012	7.99e-05
AT1G65030	1.25614	0.000107399		LOC_Os01g71100	-1.30826	7.99e-05
AT1G65040	0.999776	0.000107399		LOC_Os01g71106	-1.16361	7.99e-05
AT1G65060	-7.14861	0.000107399		LOC_Os01g71114	-3.04904	7.99e-05
AT1G65070	0.920236	0.000107399		LOC_Os01g71180	-1.19997	7.99e-05
AT1G65190	-2.74894	0.000107399		LOC_Os01g71190	-0.36163	7.99e-05
AT1G65220	1.58434	0.000107399		LOC_Os01g71200	-0.790891	7.99e-05
AT1G65250	-2.79365	0.000107399		LOC_Os01g71220	-2.39446	7.99e-05
AT1G65280	1.884	0.000107399		LOC_Os01g71250	-0.975175	7.99e-05
AT1G65290	1.29834	0.000107399		LOC_Os01g71262	-1.57411	7.99e-05
AT1G65295	-3.08108	0.000107399		LOC_Os01g71270	-1.73557	7.99e-05
AT1G65370	-1.69226	0.000107399		LOC_Os01g71300	0.361409	7.99e-05
AT1G65380	-1.24153	0.000107399		LOC_Os01g71310	0.37843	7.99e-05
AT1G65430	1.62618	0.000107399		LOC_Os01g71320	1.36006	7.99e-05
AT1G65450	-2.72099	0.000107399		LOC_Os01g71330	-2.60877	7.99e-05
AT1G65470	-4.82512	0.000107399		LOC_Os01g71340	-1.26497	7.99e-05
AT1G65480	-2.0278	0.000107399		LOC_Os01g71599	-1.18718	7.99e-05
AT1G65486	-1.84117	0.000107399		LOC_Os01g71620	-1.62691	7.99e-05
AT1G65490	-2.03225	0.000107399		LOC_Os01g71630	-0.278201	7.99e-05
AT1G65540	-1.26429	0.000107399		LOC_Os01g71670	-3.9788	7.99e-05
AT1G65580	1.25728	0.000107399		LOC_Os01g71710	1.99632	7.99e-05
AT1G65590	-1.93823	0.000107399		LOC_Os01g71720	-0.918214	7.99e-05
AT1G65610	-2.6072	0.000107399		LOC_Os01g71770	0.420606	7.99e-05
AT1G65620	-1.91302	0.000107399		LOC_Os01g71790	0.685046	7.99e-05
AT1G65660	3.83912	0.000107399		LOC_Os01g71810	-1.50393	7.99e-05
AT1G65720	2.5498	0.000107399		LOC_Os01g71930	-0.80859	7.99e-05
AT1G65790	-2.66493	0.000107399		LOC_Os01g71960	-0.787867	7.99e-05
AT1G65800	-0.947221	0.000107399		LOC_Os01g71970	-2.8091	7.99e-05
AT1G65820	2.16584	0.000107399		LOC_Os01g71990	0.421631	7.99e-05
AT1G65860	-3.60058	0.000107399		LOC_Os01g72000	2.58424	7.99e-05
AT1G65890	-4.07421	0.000107399		LOC_Os01g72009	-1.93774	7.99e-05
AT1G65900	-4.19518	0.000107399		LOC_Os01g72049	-1.10299	7.99e-05
AT1G65920	-2.91235	0.000107399		LOC_Os01g72080	2.86381	7.99e-05
AT1G65980	3.47468	0.000107399		LOC_Os01g72100	2.35382	7.99e-05
AT1G65985	-3.29878	0.000107399		LOC_Os01g72120	-2.33493	7.99e-05
AT1G66080	3.40357	0.000107399		LOC_Os01g72170	-0.787819	7.99e-05
AT1G66140	-2.34439	0.000107399		LOC_Os01g72200	0.383876	7.99e-05
AT1G66200	-1.08117	0.000107399		LOC_Os01g72205	1.23052	7.99e-05
AT1G66240	1.83657	0.000107399		LOC_Os01g72220	0.378042	7.99e-05
AT1G66250	-1.99866	0.000107399		LOC_Os01g72230	-2.64006	7.99e-05
AT1G66350	-2.60377	0.000107399		LOC_Os01g72240	-1.84777	7.99e-05
AT1G66400	1.29763	0.000107399		LOC_Os01g72250	-1.32196	7.99e-05
AT1G66410	1.14565	0.000107399		LOC_Os01g72260	-0.684799	7.99e-05
AT1G66430	-2.33409	0.000107399		LOC_Os01g72290	-2.62264	7.99e-05
AT1G66460	-2.31586	0.000107399		LOC_Os01g72300	-4.06337	7.99e-05
AT1G66480	-1.6215	0.000107399		LOC_Os01g72320	-1.1665	7.99e-05
AT1G66500	4.62736	0.000107399		LOC_Os01g72330	-1.57386	7.99e-05
AT1G66510	4.00863	0.000107399		LOC_Os01g72340	-0.667234	7.99e-05
AT1G66530	-1.7314	0.000107399		LOC_Os01g72350	-1.12276	7.99e-05
AT1G66540	-2.019	0.000107399		LOC_Os01g72370	-7.24258	7.99e-05
AT1G66580	2.43226	0.000107399		LOC_Os01g72380	-1.21346	7.99e-05
AT1G66590	1.35754	0.000107399		LOC_Os01g72410	-2.99134	7.99e-05
AT1G66620	-3.08495	0.000107399		LOC_Os01g72420	-1.82048	7.99e-05
AT1G66725	-1.48778	0.000107399		LOC_Os01g72430	-0.490182	7.99e-05
AT1G66730	-2.56147	0.000107399		LOC_Os01g72460	0.771467	7.99e-05
AT1G66760	2.08191	0.000107399		LOC_Os01g72480	1.18475	7.99e-05
AT1G66810	2.56502	0.000107399		LOC_Os01g72490	-0.627951	7.99e-05
AT1G66820	-2.07475	0.000107399		LOC_Os01g72520	0.511576	7.99e-05
AT1G66830	-2.1301	0.000107399		LOC_Os01g72530	6.9053	7.99e-05
AT1G66840	-1.7028	0.000107399		LOC_Os01g72600	2.18297	7.99e-05
AT1G66860	4.8464	0.000107399		LOC_Os01g72610	3.60579	7.99e-05
AT1G66880	-3.09749	0.000107399		LOC_Os01g72670	-2.00748	7.99e-05
AT1G66920	-2.08281	0.000107399		LOC_Os01g72690	1.04876	7.99e-05
AT1G66940	-3.84976	0.000107399		LOC_Os01g72780	-0.552326	7.99e-05
AT1G66960	-3.26922	0.000107399		LOC_Os01g72800	-0.259499	7.99e-05
AT1G66970	-2.81569	0.000107399		LOC_Os01g72820	-0.721359	7.99e-05
AT1G66980	-2.30506	0.000107399		LOC_Os01g72834	-1.10512	7.99e-05
AT1G67000	-1.63475	0.000107399		LOC_Os01g72870	1.28245	7.99e-05
AT1G67010	inf	0.000107399		LOC_Os01g72880	0.334452	7.99e-05
AT1G67110	3.03735	0.000107399		LOC_Os01g72890	-0.421533	7.99e-05
AT1G67140	-1.8561	0.000107399		LOC_Os01g72900	5.38392	7.99e-05
AT1G67180	-2.34769	0.000107399		LOC_Os01g72910	5.01527	7.99e-05
AT1G67210	1.63308	0.000107399		LOC_Os01g72940	0.300689	7.99e-05
AT1G67250	-1.12785	0.000107399		LOC_Os01g72950	0.713579	7.99e-05
AT1G67260	-2.86607	0.000107399		LOC_Os01g72960	0.72768	7.99e-05
AT1G67265	6.14543	0.000107399		LOC_Os01g72980	-0.882759	7.99e-05
AT1G67280	1.25879	0.000107399		LOC_Os01g72990	-2.1571	7.99e-05
AT1G67300	2.31313	0.000107399		LOC_Os01g73000	0.730409	7.99e-05
AT1G67310	2.15316	0.000107399		LOC_Os01g73080	-1.5079	7.99e-05
[truncated: 15,939 more rows]
