# Supplementary material for: The Global Changes of N6-methyldeoxyadenosine in Response to Low Temperature in Arabidopsis thaliana and Rice
Source: Plants (Basel). 2023 Jun 19;12(12):2373. doi: 10.3390/plants12122373 (PMC10305114; doi:10.3390/plants12122373)
Supplement: Supplementary file 1 [file plants-12-02373-s001.zip › Table S9.xlsx]

## Sheet: Sheet1
		Table S9. Go analysis of the overlapped genes between DMGs and DEGs in Arabidopsis and rice upon cold treatment
Arabidopsis										Arabidopsis
DMG-UP & DEGs-down										DMG-UP & DEGs-up										Rice										Rice
GO_acc	term_type	Term	queryitem	querytotal	bgitem	bgtotal	pvalue	FDR		GO_acc	term_type	Term	queryitem	querytotal	bgitem	bgtotal	pvalue	FDR		DMG-UP & DEGs-down										DMG-UP & DEGs-up
GO:0005524	F	ATP binding	64	374	2248	28362	7.1e-09	3.7e-06		GO:0005623	C	cell	330	358	22664	28362	1.5e-10	1.3e-08		GO_acc	term_type	Term	queryitem	querytotal	bgitem	bgtotal	pvalue	FDR		GO_acc	term_type	Term	queryitem	querytotal	bgitem	bgtotal	pvalue	FDR
GO:0030554	F	adenyl nucleotide binding	64	374	2366	28362	4.6e-08	6e-06		GO:0044464	C	cell part	330	358	22662	28362	1.4e-10	1.3e-08		GO:0032555	F	purine ribonucleotide binding	82	248	3292	24075	9.3e-15	1.7e-12		GO:0009056	P	catabolic process	13	180	433	24075	3.1e-05	0.013
GO:0032559	F	adenyl ribonucleotide binding	64	374	2364	28362	4.5e-08	6e-06		GO:0005622	C	intracellular	313	358	20721	28362	4e-11	1.3e-08		GO:0032553	F	ribonucleotide binding	82	248	3292	24075	9.3e-15	1.7e-12
GO:0035639	F	purine ribonucleoside triphosphate binding	67	374	2515	28362	3.7e-08	6e-06		GO:0044424	C	intracellular part	312	358	20693	28362	7.9e-11	1.3e-08		GO:0017076	F	purine nucleotide binding	83	248	3456	24075	4.5e-14	5.4e-12
GO:1901265	F	nucleoside phosphate binding	81	374	3370	28362	8.4e-08	7.3e-06		GO:0005634	C	nucleus	185	358	9924	28362	1e-10	1.3e-08		GO:0005524	F	ATP binding	77	248	3085	24075	8e-14	6e-12
GO:0000166	F	nucleotide binding	81	374	3370	28362	8.4e-08	7.3e-06		GO:0044428	C	nuclear part	37	358	1078	28362	7.3e-08	5.7e-06		GO:0032559	F	adenyl ribonucleotide binding	77	248	3087	24075	8.3e-14	6e-12
GO:0001882	F	nucleoside binding	67	374	2618	28362	1.6e-07	7.9e-06		GO:0043231	C	intracellular membrane-bounded organelle	272	358	18205	28362	1.3e-06	7.9e-05		GO:0001882	F	nucleoside binding	79	248	3257	24075	1.5e-13	8.9e-12
GO:0001883	F	purine nucleoside binding	67	374	2612	28362	1.5e-07	7.9e-06		GO:0043227	C	membrane-bounded organelle	272	358	18217	28362	1.4e-06	7.9e-05		GO:0030554	F	adenyl nucleotide binding	78	248	3247	24075	3.7e-13	1.7e-11
GO:0017076	F	purine nucleotide binding	67	374	2633	28362	2e-07	7.9e-06		GO:0043229	C	intracellular organelle	272	358	18517	28362	9.1e-06	0.00045		GO:0001883	F	purine nucleoside binding	78	248	3247	24075	3.7e-13	1.7e-11
GO:0032550	F	purine ribonucleoside binding	67	374	2612	28362	1.5e-07	7.9e-06		GO:0043226	C	organelle	272	358	18527	28362	9.6e-06	0.00045		GO:0000166	F	nucleotide binding	84	248	3874	24075	7.4e-12	3e-10
GO:0032555	F	purine ribonucleotide binding	67	374	2631	28362	1.9e-07	7.9e-06		GO:0016070	P	RNA metabolic process	76	358	3403	28362	6.7e-07	0.0015		GO:0006950	P	response to stress	30	248	873	24075	1.4e-08	4.4e-06
GO:0032549	F	ribonucleoside binding	67	374	2617	28362	1.6e-07	7.9e-06		GO:0005635	C	nuclear envelope	9	358	122	28362	4.1e-05	0.0017		GO:0008219	P	cell death	22	248	544	24075	9.6e-08	4.9e-06
GO:0036094	F	small molecule binding	81	374	3434	28362	1.8e-07	7.9e-06		GO:0005515	F	protein binding	77	358	3669	28362	5.6e-06	0.0024		GO:0016265	P	death	22	248	544	24075	9.6e-08	4.9e-06
GO:0032553	F	ribonucleotide binding	67	374	2664	28362	3e-07	1.1e-05		GO:0031981	C	nuclear lumen	25	358	824	28362	7.4e-05	0.0028		GO:0012501	P	programmed cell death	22	248	532	24075	6.6e-08	4.9e-06
GO:0097367	F	carbohydrate derivative binding	67	374	2696	28362	4.6e-07	1.6e-05		GO:1990234	C	transferase complex	17	358	445	28362	8e-05	0.0029		GO:0050896	P	response to stimulus	32	248	1026	24075	4.1e-08	4.9e-06
GO:0005623	C	cell	336	374	22664	28362	2e-07	0.00012		GO:0009628	P	response to abiotic stimulus	51	358	2022	28362	2.6e-06	0.003		GO:0006915	P	apoptosis	22	248	532	24075	6.6e-08	4.9e-06
GO:0016887	F	ATPase activity	22	374	530	28362	4.1e-06	0.00013		GO:0090304	P	nucleic acid metabolic process	79	358	3768	28362	4.2e-06	0.0033		GO:0006952	P	defense response	19	248	452	24075	4.2e-07	1.9e-05
GO:0044464	C	cell part	335	374	22662	28362	4.4e-07	0.00013		GO:0006139	P	nucleobase-containing compound metabolic process	84	358	4178	28362	9.5e-06	0.0055		GO:0044267	P	cellular protein metabolic process	55	248	2877	24075	4.9e-06	0.00019
GO:0071944	C	cell periphery	93	374	4309	28362	9.2e-07	0.00013		GO:0050789	P	regulation of biological process	100	358	5306	28362	1.6e-05	0.0072		GO:0016301	F	kinase activity	38	248	1750	24075	1.3e-05	0.00043
GO:0005886	C	plasma membrane	84	374	3735	28362	7.3e-07	0.00013		GO:0070013	C	intracellular organelle lumen	27	358	1008	28362	0.00027	0.008		GO:0004674	F	protein serine/threonine kinase activity	34	248	1478	24075	1.2e-05	0.00043
GO:0017111	F	nucleoside-triphosphatase activity	27	374	766	28362	6.4e-06	0.00018		GO:0031974	C	membrane-enclosed lumen	27	358	1008	28362	0.00027	0.008		GO:0004672	F	protein kinase activity	35	248	1575	24075	1.9e-05	0.00056
GO:0016462	F	pyrophosphatase activity	28	374	809	28362	6e-06	0.00018		GO:0043233	C	organelle lumen	27	358	1008	28362	0.00027	0.008		GO:0016773	F	phosphotransferase activity, alcohol group as acceptor	37	248	1726	24075	2.3e-05	0.00063
GO:0016818	F	hydrolase activity, acting on acid anhydrides, in phosphorus-containing anhydrides	28	374	817	28362	7.1e-06	0.00019		GO:0006725	P	cellular aromatic compound metabolic process	88	358	4588	28362	3.3e-05	0.011		GO:0006464	P	protein modification process	40	248	1929	24075	2.1e-05	0.00073
GO:0051301	P	cell division	20	374	358	28362	1.5e-07	0.0002		GO:0046483	P	heterocycle metabolic process	86	358	4433	28362	2.7e-05	0.011		GO:0016310	P	phosphorylation	36	248	1695	24075	3.6e-05	0.0011
GO:0044699	P	single-organism process	173	374	9448	28362	1.7e-07	0.0002		GO:1901360	P	organic cyclic compound metabolic process	89	358	4700	28362	4.6e-05	0.013		GO:0043412	P	macromolecule modification	40	248	1979	24075	3.7e-05	0.0011
GO:0016817	F	hydrolase activity, acting on acid anhydrides	28	374	826	28362	8.6e-06	0.00022		GO:0050793	P	regulation of developmental process	21	358	627	28362	7.5e-05	0.016		GO:0006468	P	protein amino acid phosphorylation	34	248	1570	24075	4.1e-05	0.0011
GO:0044446	C	intracellular organelle part	100	374	4882	28362	3.2e-06	0.00034		GO:0090567	P	reproductive shoot system development	19	358	533	28362	7.5e-05	0.016		GO:0043687	P	post-translational protein modification	37	248	1815	24075	6.4e-05	0.0015
GO:0044422	C	organelle part	100	374	4894	28362	3.6e-06	0.00034		GO:0008380	P	RNA splicing	12	358	236	28362	7.3e-05	0.016		GO:0006796	P	phosphate metabolic process	36	248	1795	24075	0.00011	0.0023
GO:0007049	P	cell cycle	24	374	558	28362	8.3e-07	0.00062		GO:0010467	P	gene expression	88	358	4747	28362	0.00011	0.017		GO:0006793	P	phosphorus metabolic process	36	248	1795	24075	0.00011	0.0023
GO:0044763	P	single-organism cellular process	128	374	6591	28362	1.1e-06	0.00065		GO:0006397	P	mRNA processing	14	358	324	28362	0.0001	0.017		GO:0017111	F	nucleoside-triphosphatase activity	20	248	726	24075	8.8e-05	0.0023
GO:0000278	P	mitotic cell cycle	15	374	245	28362	1.9e-06	0.00084		GO:0010468	P	regulation of gene expression	59	358	2814	28362	9e-05	0.017		GO:0016462	F	pyrophosphatase activity	20	248	743	24075	0.00012	0.0029
GO:1901363	F	heterocyclic compound binding	137	374	7718	28362	4.9e-05	0.0012		GO:0006396	P	RNA processing	22	358	693	28362	0.00011	0.017		GO:0016818	F	hydrolase activity, acting on acid anhydrides, in phosphorus-containing anhydrides	20	248	759	24075	0.00016	0.0035
GO:0022402	P	cell cycle process	18	374	370	28362	4e-06	0.0013		GO:0048856	P	anatomical structure development	63	358	3146	28362	0.00018	0.018		GO:0016817	F	hydrolase activity, acting on acid anhydrides	20	248	764	24075	0.00017	0.0036
GO:1903047	P	mitotic cell cycle process	14	374	228	28362	4e-06	0.0013		GO:0044260	P	cellular macromolecule metabolic process	125	358	7410	28362	0.00016	0.018		GO:0008238	F	exopeptidase activity	6	248	82	24075	0.00029	0.0057
GO:0097159	F	organic cyclic compound binding	137	374	7737	28362	5.6e-05	0.0013		GO:0009908	P	flower development	18	358	520	28362	0.00016	0.018		GO:0019538	P	protein metabolic process	67	248	4333	24075	0.00031	0.006
GO:0005488	F	binding	197	374	12081	28362	6.2e-05	0.0014		GO:0043170	P	macromolecule metabolic process	135	358	8111	28362	0.00014	0.018		GO:0004386	F	helicase activity	8	248	165	24075	0.00042	0.0079
GO:0042623	F	ATPase activity, coupled	16	374	389	28362	9.4e-05	0.002		GO:0097659	P	nucleic acid-templated transcription	54	358	2561	28362	0.00016	0.018		GO:0070008	F	serine-type exopeptidase activity	5	248	61	24075	0.00057	0.0098
GO:0030054	C	cell junction	28	374	901	28362	3.9e-05	0.0022		GO:0009909	P	regulation of flower development	9	358	150	28362	0.00018	0.018		GO:0004185	F	serine-type carboxypeptidase activity	5	248	61	24075	0.00057	0.0098
GO:0005911	C	cell-cell junction	28	374	901	28362	3.9e-05	0.0022		GO:0032774	P	RNA biosynthetic process	54	358	2566	28362	0.00017	0.018		GO:0004180	F	carboxypeptidase activity	5	248	63	24075	0.00065	0.011
GO:0009506	C	plasmodesma	28	374	899	28362	3.8e-05	0.0022		GO:0006351	P	transcription, DNA-templated	54	358	2559	28362	0.00016	0.018		GO:0042623	F	ATPase activity, coupled	10	248	275	24075	0.00073	0.012
GO:0055044	C	symplast	28	374	899	28362	3.8e-05	0.0022		GO:0005488	F	binding	188	358	12081	28362	0.00011	0.021		GO:0003824	F	catalytic activity	156	248	12724	24075	0.00093	0.014
GO:0016020	C	membrane	148	374	8532	28362	6.5e-05	0.0034		GO:0032502	P	developmental process	64	358	3233	28362	0.00022	0.021		GO:0070035	F	purine NTP-dependent helicase activity	6	248	107	24075	0.0011	0.015
GO:0042803	F	protein homodimerization activity	9	374	143	28362	0.00018	0.0037		GO:0019222	P	regulation of metabolic process	63	358	3181	28362	0.00024	0.021		GO:0008026	F	ATP-dependent helicase activity	6	248	107	24075	0.0011	0.015
GO:0016772	F	transferase activity, transferring phosphorus-containing groups	40	374	1657	28362	0.00022	0.0044		GO:0051252	P	regulation of RNA metabolic process	52	358	2474	28362	0.00023	0.021
GO:0004674	F	protein serine/threonine kinase activity	23	374	767	28362	0.00031	0.006		GO:0008270	F	zinc ion binding	33	358	1297	28362	0.00015	0.021
GO:0044425	C	membrane part	109	374	5962	28362	0.00014	0.0069		GO:0051171	P	regulation of nitrogen compound metabolic process	56	358	2739	28362	0.00026	0.022
GO:0043234	C	protein complex	43	374	1834	28362	0.00023	0.01		GO:0048367	P	shoot system development	25	358	896	28362	0.00026	0.022
GO:0003824	F	catalytic activity	150	374	9101	28362	0.00071	0.013		GO:0044767	P	single-organism developmental process	62	358	3131	28362	0.00027	0.022
GO:0004222	F	metalloendopeptidase activity	5	374	50	28362	0.00074	0.013		GO:0005654	C	nucleoplasm	13	358	359	28362	0.00088	0.024
GO:0006996	P	organelle organization	36	374	1335	28362	5.7e-05	0.015		GO:1902494	C	catalytic complex	20	358	711	28362	0.00095	0.025
GO:0050789	P	regulation of biological process	101	374	5306	28362	6.1e-05	0.015		GO:0003006	P	developmental process involved in reproduction	35	358	1496	28362	0.00043	0.025
GO:0044437	C	vacuolar part	22	374	725	28362	0.00036	0.015		GO:0048444	P	floral organ morphogenesis	5	358	46	28362	0.00043	0.025
GO:0005694	C	chromosome	13	374	323	28362	0.00051	0.018		GO:0010286	P	heat acclimation	5	358	46	28362	0.00043	0.025
GO:0031224	C	intrinsic component of membrane	100	374	5540	28362	0.00048	0.018		GO:0048563	P	post-embryonic organ morphogenesis	5	358	46	28362	0.00043	0.025
GO:0004175	F	endopeptidase activity	10	374	225	28362	0.0011	0.019		GO:0031323	P	regulation of cellular metabolic process	59	358	2980	28362	0.0004	0.025
GO:0043229	C	intracellular organelle	274	374	18517	28362	0.00063	0.021		GO:0019219	P	regulation of nucleobase-containing compound metabolic process	52	358	2529	28362	0.00039	0.025
GO:0008237	F	metallopeptidase activity	6	374	85	28362	0.0012	0.021		GO:0048831	P	regulation of shoot system development	10	358	204	28362	0.00038	0.025
GO:0043226	C	organelle	274	374	18527	28362	0.00066	0.021		GO:0000003	P	reproduction	39	358	1721	28362	0.00037	0.025
GO:0031090	C	organelle membrane	40	374	1760	28362	0.0007	0.021		GO:0022414	P	reproductive process	39	358	1715	28362	0.00035	0.025
GO:0007017	P	microtubule-based process	9	374	132	28362	0.0001	0.023		GO:0009266	P	response to temperature stimulus	18	358	559	28362	0.00038	0.025
GO:0005774	C	vacuolar membrane	21	374	720	28362	0.00079	0.023		GO:0009987	P	cellular process	193	358	12771	28362	0.0005	0.027
GO:0042802	F	identical protein binding	10	374	236	28362	0.0015	0.025		GO:0048518	P	positive regulation of biological process	24	358	881	28362	0.00047	0.027
GO:0016301	F	kinase activity	33	374	1436	28362	0.0017	0.026		GO:0048522	P	positive regulation of cellular process	20	358	676	28362	0.00052	0.027
GO:0005515	F	protein binding	69	374	3669	28362	0.0016	0.026		GO:0060255	P	regulation of macromolecule metabolic process	59	358	2998	28362	0.00046	0.027
GO:0005938	C	cell cortex	6	374	83	28362	0.0011	0.027		GO:0044707	P	single-multicellular organism process	57	358	2875	28362	0.00049	0.027
GO:0099568	C	cytoplasmic region	6	374	83	28362	0.0011	0.027		GO:0044451	C	nucleoplasm part	11	358	283	28362	0.0012	0.03
GO:0016021	C	integral component of membrane	95	374	5324	28362	0.001	0.027		GO:0032501	P	multicellular organismal process	59	358	3032	28362	0.00061	0.031
GO:0044424	C	intracellular part	299	374	20693	28362	0.0012	0.028		GO:0034654	P	nucleobase-containing compound biosynthetic process	55	358	2781	28362	0.00066	0.032
GO:0016043	P	cellular component organization	54	374	2456	28362	0.00018	0.03		GO:0001101	P	response to acid chemical	29	358	1181	28362	0.00065	0.032
GO:0009987	P	cellular process	203	374	12771	28362	0.00023	0.03		GO:0031328	P	positive regulation of cellular biosynthetic process	14	358	396	28362	0.0007	0.034
GO:0006260	P	DNA replication	9	374	146	28362	0.00021	0.03		GO:0044702	P	single organism reproductive process	35	358	1544	28362	0.00075	0.035
GO:0005622	C	intracellular	299	374	20721	28362	0.0013	0.03		GO:2000241	P	regulation of reproductive process	11	358	266	28362	0.00077	0.036
GO:0043231	C	intracellular membrane-bounded organelle	268	374	18205	28362	0.0014	0.03		GO:0065007	P	biological regulation	102	358	6062	28362	0.00097	0.037
GO:0005874	C	microtubule	9	374	193	28362	0.0014	0.03		GO:0044237	P	cellular metabolic process	154	358	9879	28362	0.00087	0.037
GO:0000280	P	nuclear division	11	374	215	28362	0.0002	0.03		GO:0018130	P	heterocycle biosynthetic process	57	358	2957	28362	0.00095	0.037
GO:0010015	P	root morphogenesis	12	374	249	28362	0.00018	0.03		GO:0016071	P	mRNA metabolic process	14	358	409	28362	0.00095	0.037
GO:1902578	P	single-organism localization	29	374	1040	28362	0.00018	0.03		GO:0007275	P	multicellular organism development	55	358	2811	28362	0.00084	0.037
GO:0044765	P	single-organism transport	28	374	1004	28362	0.00023	0.03		GO:0009891	P	positive regulation of biosynthetic process	14	358	409	28362	0.00095	0.037
GO:0043227	C	membrane-bounded organelle	268	374	18217	28362	0.0015	0.031		GO:0044238	P	primary metabolic process	154	358	9890	28362	0.00092	0.037
GO:0009524	C	phragmoplast	6	374	91	28362	0.0017	0.034		GO:1903506	P	regulation of nucleic acid-templated transcription	49	358	2445	28362	0.001	0.037
GO:0005215	F	transporter activity	32	374	1406	28362	0.0023	0.035		GO:0080090	P	regulation of primary metabolic process	56	358	2889	28362	0.00093	0.037
GO:0016773	F	phosphotransferase activity, alcohol group as acceptor	26	374	1072	28362	0.0026	0.038		GO:2001141	P	regulation of RNA biosynthetic process	49	358	2445	28362	0.001	0.037
GO:0008094	F	DNA-dependent ATPase activity	5	374	69	28362	0.0028	0.039		GO:0006355	P	regulation of transcription, DNA-templated	49	358	2443	28362	0.00099	0.037
GO:0043412	P	macromolecule modification	54	374	2532	28362	0.00037	0.039		GO:1901700	P	response to oxygen-containing compound	35	358	1557	28362	0.00086	0.037
GO:0000281	P	mitotic cytokinesis	6	374	65	28362	0.00033	0.039		GO:2000112	P	regulation of cellular macromolecule biosynthetic process	52	358	2657	28362	0.0012	0.043
GO:0048364	P	root development	17	374	482	28362	0.00033	0.039		GO:0019438	P	aromatic compound biosynthetic process	58	358	3058	28362	0.0012	0.044
GO:0022622	P	root system development	17	374	484	28362	0.00035	0.039		GO:0010557	P	positive regulation of macromolecule biosynthetic process	13	358	373	28362	0.0012	0.044
GO:0000910	P	cytokinesis	7	374	99	28362	0.00048	0.041		GO:0010556	P	regulation of macromolecule biosynthetic process	52	358	2666	28362	0.0013	0.044
GO:0061640	P	cytoskeleton-dependent cytokinesis	6	374	69	28362	0.00044	0.041		GO:0009408	P	response to heat	9	358	199	28362	0.0013	0.044
GO:0006259	P	DNA metabolic process	18	374	539	28362	0.00042	0.041		GO:0032991	C	macromolecular complex	51	358	2658	28362	0.002	0.046
GO:0006261	P	DNA-dependent DNA replication	7	374	99	28362	0.00048	0.041		GO:0048519	P	negative regulation of biological process	22	358	848	28362	0.0015	0.049
GO:0031975	C	envelope	28	374	1170	28362	0.0022	0.041		GO:0009889	P	regulation of biosynthetic process	53	358	2752	28362	0.0015	0.049
GO:0015630	C	microtubule cytoskeleton	10	374	252	28362	0.0024	0.041		GO:0050794	P	regulation of cellular process	84	358	4857	28362	0.0015	0.049
GO:0007067	P	mitotic nuclear division	8	374	131	28362	0.00049	0.041
GO:0031967	C	organelle envelope	28	374	1170	28362	0.0022	0.041
GO:0099513	C	polymeric cytoskeletal fiber	9	374	209	28362	0.0023	0.041
GO:0050794	P	regulation of cellular process	90	374	4857	28362	0.00044	0.041
GO:0099512	C	supramolecular fiber	9	374	209	28362	0.0023	0.041
GO:0012505	C	endomembrane system	44	374	2143	28362	0.0027	0.043
GO:0006796	P	phosphate-containing compound metabolic process	40	374	1735	28362	0.00054	0.043
GO:0005773	C	vacuole	31	374	1359	28362	0.0026	0.043
GO:0044427	C	chromosomal part	10	374	259	28362	0.0029	0.046
GO:0004672	F	protein kinase activity	23	374	925	28362	0.0034	0.046
GO:0065007	P	biological regulation	107	374	6062	28362	0.00064	0.047
GO:0006793	P	phosphorus metabolic process	40	374	1751	28362	0.00064	0.047
GO:0048731	P	system development	43	374	1929	28362	0.00065	0.047
